# Supplementary material for: Confirmation of the predictive function of cuproptosis-related gene FDX1 in clear cell renal carcinoma using qRT-PCR and western blotting
Source: Aging (Albany NY). 2023 Jul 10;15(13):6117–34. doi: 10.18632/aging.204807 (PMC10373983; doi:10.18632/aging.204807)
Supplement: Supplementary Tables 1-5, 7-8 and 10 [file aging-15-204807-s001.xlsx]

## Sheet: Supplementary Table 1
Supplementary Table 1. 146 genes correlated to FDX1.
Query	Gene	cor	pvalue
FDX1	COLGALT1	-0.575883	4.11e-49
FDX1	PLD2	-0.566924	2.51e-47
FDX1	AMPD2	-0.566863	2.58e-47
FDX1	TMEM44	-0.563923	9.69e-47
FDX1	BMP1	-0.562945	1.5e-46
FDX1	DAGLB	-0.558087	1.29e-45
FDX1	SH3D21	-0.553303	1.03e-44
FDX1	MAP3K12	-0.546764	1.68e-43
FDX1	MYO9B	-0.542776	8.95e-43
FDX1	INTS3	-0.54015	2.66e-42
FDX1	NUMBL	-0.539617	3.31e-42
FDX1	C1QTNF6	-0.539296	3.78e-42
FDX1	ENO2	-0.534042	3.23e-41
FDX1	CNTROB	-0.525187	1.1e-39
FDX1	PML	-0.523273	2.33e-39
FDX1	SFXN3	-0.522484	3.17e-39
FDX1	POLE	-0.522215	3.52e-39
FDX1	EHBP1L1	-0.522193	3.55e-39
FDX1	MED15	-0.519439	1.03e-38
FDX1	JAK3	-0.518707	1.37e-38
FDX1	GRAMD1A	-0.516946	2.68e-38
FDX1	THBS3	-0.513413	1.03e-37
FDX1	SSBP4	-0.510745	2.8e-37
FDX1	SIPA1	-0.510649	2.9e-37
FDX1	MOV10	-0.509402	4.63e-37
FDX1	ADAMTS10	-0.507881	8.14e-37
FDX1	PLEC	-0.504178	3.19e-36
FDX1	IFFO1	-0.50405	3.34e-36
FDX1	DTX2	-0.501797	7.6e-36
FDX1	TMEM79	-0.501456	8.6e-36
FDX1	P3H1	-0.501046	9.98e-36
FDX1	ZDHHC8	-0.500882	1.06e-35
FDX1	STAT2	-0.500499	1.22e-35
FDX1	MARS2	0.500718	1.12e-35
FDX1	TAX1BP1	0.500725	1.12e-35
FDX1	NDUFS1	0.500845	1.07e-35
FDX1	SUCLA2	0.501227	9.35e-36
FDX1	SLC25A5	0.501409	8.75e-36
FDX1	CDS1	0.501609	8.14e-36
FDX1	SACM1L	0.501965	7.15e-36
FDX1	TMEM251	0.501999	7.06e-36
FDX1	MPP7	0.502264	6.41e-36
FDX1	CCNC	0.5023	6.33e-36
FDX1	RDH11	0.502917	5.05e-36
FDX1	AASDHPPT	0.503584	3.96e-36
FDX1	VAPA	0.50391	3.52e-36
FDX1	ATG4A	0.504459	2.88e-36
FDX1	FBXL17	0.505825	1.74e-36
FDX1	ATP5PB	0.505994	1.64e-36
FDX1	ATP6AP2	0.506415	1.4e-36
FDX1	WDR72	0.506492	1.36e-36
FDX1	PPM1A	0.507157	1.06e-36
FDX1	ATP6V1E1	0.507255	1.03e-36
FDX1	NNT	0.509089	5.2e-37
FDX1	OCIAD1	0.509318	4.77e-37
FDX1	ISCA2	0.511446	2.15e-37
FDX1	DPH3	0.511681	1.97e-37
FDX1	NUDT9	0.51255	1.42e-37
FDX1	MDH1	0.513199	1.11e-37
FDX1	GOT1	0.513522	9.86e-38
FDX1	TMED7	0.513596	9.58e-38
FDX1	ATP6V1H	0.514897	5.86e-38
FDX1	NDUFB5	0.515078	5.47e-38
FDX1	ETFRF1	0.515098	5.43e-38
FDX1	AUH	0.515372	4.89e-38
FDX1	GMFB	0.515384	4.87e-38
FDX1	HSDL2	0.517666	2.04e-38
FDX1	ANAPC13	0.518542	1.46e-38
FDX1	SLC30A9	0.518796	1.32e-38
FDX1	SYPL1	0.519022	1.21e-38
FDX1	MAIP1	0.520725	6.27e-39
FDX1	HIGD1A	0.522366	3.32e-39
FDX1	C2orf69	0.522911	2.68e-39
FDX1	CD59	0.523771	1.92e-39
FDX1	RAB9A	0.524147	1.66e-39
FDX1	RAB11A	0.527858	3.84e-40
FDX1	EIF4E	0.528194	3.36e-40
FDX1	ATP6V1G1	0.529814	1.76e-40
FDX1	AK3	0.530854	1.16e-40
FDX1	ENOPH1	0.531735	8.18e-41
FDX1	SKP1	0.532417	6.22e-41
FDX1	NDUFC2	0.532758	5.42e-41
FDX1	HACD3	0.53287	5.18e-41
FDX1	SAR1B	0.534804	2.37e-41
FDX1	TRMT10C	0.536369	1.25e-41
FDX1	TMX2	0.536579	1.15e-41
FDX1	RAB18	0.537671	7.37e-42
FDX1	DNAAF2	0.538032	6.36e-42
FDX1	DNAJA2	0.538454	5.35e-42
FDX1	MICU2	0.53902	4.24e-42
FDX1	MRPS35	0.54086	1.98e-42
FDX1	ZFAND6	0.540896	1.95e-42
FDX1	DLD	0.541238	1.7e-42
FDX1	BPGM	0.54249	1.01e-42
FDX1	IDI1	0.543535	6.52e-43
FDX1	TSG101	0.543637	6.25e-43
FDX1	PDHX	0.544007	5.35e-43
FDX1	FH	0.545332	3.07e-43
FDX1	MRPL50	0.546067	2.26e-43
FDX1	CAT	0.546341	2.01e-43
FDX1	RWDD4	0.54949	5.29e-44
FDX1	CGRRF1	0.549882	4.48e-44
FDX1	FBXO8	0.551806	1.96e-44
FDX1	COMMD10	0.553331	1.02e-44
FDX1	NDUFA5	0.555495	3.99e-45
FDX1	ETFA	0.556187	2.95e-45
FDX1	ATP5F1A	0.556374	2.72e-45
FDX1	TIMM10B	0.557101	1.98e-45
FDX1	IER3IP1	0.558274	1.18e-45
FDX1	MPC1	0.559095	8.26e-46
FDX1	PNPLA8	0.559534	6.81e-46
FDX1	SLC25A4	0.561232	3.21e-46
FDX1	ATP6V1A	0.561458	2.91e-46
FDX1	CAAP1	0.562684	1.68e-46
FDX1	PPP2CA	0.56274	1.64e-46
FDX1	ISOC1	0.565901	3.99e-47
FDX1	ALG2	0.566441	3.13e-47
FDX1	ZNRF2	0.567376	2.05e-47
FDX1	NDUFAF4	0.568362	1.31e-47
FDX1	NDUFB6	0.568526	1.22e-47
FDX1	APIP	0.568875	1.04e-47
FDX1	PDE12	0.569124	9.26e-48
FDX1	GABARAPL2	0.571942	2.55e-48
FDX1	SVIP	0.572189	2.28e-48
FDX1	SELENOT	0.575114	5.88e-49
FDX1	ATP5MG	0.575358	5.25e-49
FDX1	GFM1	0.577578	1.86e-49
FDX1	PHYH	0.581708	2.65e-50
FDX1	HCCS	0.586243	3.01e-51
FDX1	ATP6V1D	0.586381	2.82e-51
FDX1	MED21	0.588232	1.15e-51
FDX1	COMMD8	0.591261	2.61e-52
FDX1	MTCH2	0.593051	1.08e-52
FDX1	ACAT1	0.593203	1e-52
FDX1	SC5D	0.593312	9.49e-53
FDX1	LAMTOR3	0.596055	2.42e-53
FDX1	AP5M1	0.600974	2.03e-54
FDX1	CYCS	0.601435	1.6e-54
FDX1	TMEM33	0.607522	6.98e-56
FDX1	GHITM	0.607561	6.83e-56
FDX1	TMEM9B	0.621073	5.06e-59
FDX1	PPA2	0.634726	2.41e-62
FDX1	NDFIP1	0.653725	2.95e-67
FDX1	UQCRFS1	0.65865	1.37e-68
FDX1	SCOC	0.668794	2.06e-71
FDX1	SDHD	0.710633	2.4e-84

## Sheet: Supplementary Table 2
Supplementary Table 2. GO analysis of the correlated genes.
ONTOLOGY	ID	Description	GeneRatio	BgRatio	pvalue	p.adjust	qvalue	geneID	Count
BP	GO:0045333	cellular respiration	17/138	187/18862	3.50228e-14	6.40567e-11	5.84328e-11	NDUFS1/SUCLA2/NNT/MDH1/NDUFB5/ETFRF1/NDUFC2/DLD/FH/CAT/NDUFA5/ETFA/NDUFB6/CYCS/GHITM/UQCRFS1/SDHD	17
BP	GO:0006119	oxidative phosphorylation	14/138	148/18862	4.11845e-12	3.76632e-09	3.43565e-09	NDUFS1/ATP5PB/NDUFB5/NDUFC2/DLD/NDUFA5/ATP5F1A/NDUFB6/PDE12/ATP5MG/CYCS/GHITM/UQCRFS1/SDHD	14
BP	GO:0015980	energy derivation by oxidation of organic compounds	17/138	278/18862	2.18093e-11	1.32964e-08	1.2129e-08	NDUFS1/SUCLA2/NNT/MDH1/NDUFB5/ETFRF1/NDUFC2/DLD/FH/CAT/NDUFA5/ETFA/NDUFB6/CYCS/GHITM/UQCRFS1/SDHD	17
BP	GO:0022904	respiratory electron transport chain	12/138	117/18862	5.7723e-11	2.63938e-08	2.40766e-08	NDUFS1/NDUFB5/ETFRF1/NDUFC2/DLD/NDUFA5/ETFA/NDUFB6/CYCS/GHITM/UQCRFS1/SDHD	12
BP	GO:0046034	ATP metabolic process	17/138	313/18862	1.39829e-10	5.11495e-08	4.66587e-08	ENO2/NDUFS1/ATP5PB/NDUFB5/NDUFC2/DLD/BPGM/NDUFA5/ATP5F1A/ATP6V1A/NDUFB6/PDE12/ATP5MG/CYCS/GHITM/UQCRFS1/SDHD	17
BP	GO:0042775	mitochondrial ATP synthesis coupled electron transport	10/138	99/18862	2.83298e-09	8.17391e-07	7.45627e-07	NDUFS1/NDUFB5/NDUFC2/DLD/NDUFA5/NDUFB6/CYCS/GHITM/UQCRFS1/SDHD	10
BP	GO:0042773	ATP synthesis coupled electron transport	10/138	100/18862	3.12834e-09	8.17391e-07	7.45627e-07	NDUFS1/NDUFB5/NDUFC2/DLD/NDUFA5/NDUFB6/CYCS/GHITM/UQCRFS1/SDHD	10
BP	GO:0022900	electron transport chain	12/138	178/18862	7.46089e-09	1.70574e-06	1.55599e-06	NDUFS1/NDUFB5/ETFRF1/NDUFC2/DLD/NDUFA5/ETFA/NDUFB6/CYCS/GHITM/UQCRFS1/SDHD	12
BP	GO:1990542	mitochondrial transmembrane transport	9/138	109/18862	1.06039e-07	2.15495e-05	1.96575e-05	SFXN3/SLC25A5/ATP5PB/MAIP1/MICU2/ATP5F1A/MPC1/SLC25A4/ATP5MG	9
BP	GO:0006099	tricarboxylic acid cycle	6/138	34/18862	1.56255e-07	2.8579e-05	2.60699e-05	SUCLA2/NNT/MDH1/DLD/FH/SDHD	6
BP	GO:0009060	aerobic respiration	8/138	86/18862	2.19778e-07	3.65431e-05	3.33348e-05	SUCLA2/NNT/MDH1/DLD/FH/CAT/CYCS/SDHD	8
BP	GO:0090383	phagosome acidification	5/138	28/18862	1.67314e-06	0.000255014	0.000232625	ATP6V1E1/ATP6V1H/ATP6V1G1/ATP6V1A/ATP6V1D	5
BP	GO:1902600	proton transmembrane transport	9/138	157/18862	2.3396e-06	0.000329164	0.000300264	ATP5PB/ATP6V1E1/NNT/ATP6V1H/ATP6V1G1/ATP5F1A/ATP6V1A/ATP5MG/ATP6V1D	9
BP	GO:0006120	mitochondrial electron transport, NADH to ubiquinone	6/138	55/18862	2.9694e-06	0.000362069	0.000330281	NDUFS1/NDUFB5/NDUFC2/DLD/NDUFA5/NDUFB6	6
BP	GO:0051452	intracellular pH reduction	6/138	55/18862	2.9694e-06	0.000362069	0.000330281	ATP6AP2/ATP6V1E1/ATP6V1H/ATP6V1G1/ATP6V1A/ATP6V1D	6
BP	GO:0007007	inner mitochondrial membrane organization	6/138	56/18862	3.30586e-06	0.000377901	0.000344723	ATP5PB/MAIP1/ATP5F1A/TIMM10B/ATP5MG/GHITM	6
BP	GO:0045851	pH reduction	6/138	58/18862	4.072e-06	0.0004381	0.000399636	ATP6AP2/ATP6V1E1/ATP6V1H/ATP6V1G1/ATP6V1A/ATP6V1D	6
BP	GO:0009152	purine ribonucleotide biosynthetic process	9/138	175/18862	5.69979e-06	0.000579162	0.000528313	AMPD2/ATP5PB/AK3/DLD/PDHX/ATP5F1A/ATP6V1A/ATP5MG/ACAT1	9
BP	GO:0033572	transferrin transport	5/138	36/18862	6.12332e-06	0.00058945	0.000537699	ATP6V1E1/ATP6V1H/ATP6V1G1/ATP6V1A/ATP6V1D	5
BP	GO:0010257	NADH dehydrogenase complex assembly	6/138	65/18862	7.96856e-06	0.000694024	0.000633091	NDUFS1/NDUFB5/NDUFC2/NDUFA5/NDUFAF4/NDUFB6	6
BP	GO:0032981	mitochondrial respiratory chain complex I assembly	6/138	65/18862	7.96856e-06	0.000694024	0.000633091	NDUFS1/NDUFB5/NDUFC2/NDUFA5/NDUFAF4/NDUFB6	6
BP	GO:0033108	mitochondrial respiratory chain complex assembly	7/138	101/18862	9.345e-06	0.000763358	0.000696338	NDUFS1/NDUFB5/NDUFC2/NDUFA5/NDUFAF4/NDUFB6/UQCRFS1	7
BP	GO:0009150	purine ribonucleotide metabolic process	13/138	408/18862	9.59936e-06	0.000763358	0.000696338	AMPD2/ENO2/SUCLA2/ATP5PB/NUDT9/AK3/DLD/BPGM/PDHX/ATP5F1A/ATP6V1A/ATP5MG/ACAT1	13
BP	GO:0009260	ribonucleotide biosynthetic process	9/138	188/18862	1.01757e-05	0.000775473	0.00070739	AMPD2/ATP5PB/AK3/DLD/PDHX/ATP5F1A/ATP6V1A/ATP5MG/ACAT1	9
BP	GO:0046390	ribose phosphate biosynthetic process	9/138	195/18862	1.36404e-05	0.000973546	0.000888072	AMPD2/ATP5PB/AK3/DLD/PDHX/ATP5F1A/ATP6V1A/ATP5MG/ACAT1	9
BP	GO:0006164	purine nucleotide biosynthetic process	9/138	197/18862	1.47981e-05	0.000973546	0.000888072	AMPD2/ATP5PB/AK3/DLD/PDHX/ATP5F1A/ATP6V1A/ATP5MG/ACAT1	9
BP	GO:0009259	ribonucleotide metabolic process	13/138	425/18862	1.4801e-05	0.000973546	0.000888072	AMPD2/ENO2/SUCLA2/ATP5PB/NUDT9/AK3/DLD/BPGM/PDHX/ATP5F1A/ATP6V1A/ATP5MG/ACAT1	13
BP	GO:0009067	aspartate family amino acid biosynthetic process	4/138	21/18862	1.49039e-05	0.000973546	0.000888072	AASDHPPT/GOT1/ENOPH1/APIP	4
BP	GO:0019693	ribose phosphate metabolic process	13/138	435/18862	1.89023e-05	0.00119215	0.00108748	AMPD2/ENO2/SUCLA2/ATP5PB/NUDT9/AK3/DLD/BPGM/PDHX/ATP5F1A/ATP6V1A/ATP5MG/ACAT1	13
BP	GO:0090382	phagosome maturation	5/138	46/18862	2.09957e-05	0.00128004	0.00116765	ATP6V1E1/ATP6V1H/ATP6V1G1/ATP6V1A/ATP6V1D	5
BP	GO:0006163	purine nucleotide metabolic process	13/138	441/18862	2.18155e-05	0.00128712	0.00117411	AMPD2/ENO2/SUCLA2/ATP5PB/NUDT9/AK3/DLD/BPGM/PDHX/ATP5F1A/ATP6V1A/ATP5MG/ACAT1	13
BP	GO:0072522	purine-containing compound biosynthetic process	9/138	208/18862	2.27777e-05	0.00130189	0.00118759	AMPD2/ATP5PB/AK3/DLD/PDHX/ATP5F1A/ATP6V1A/ATP5MG/ACAT1	9
BP	GO:0009066	aspartate family amino acid metabolic process	5/138	50/18862	3.17006e-05	0.00175698	0.00160273	AASDHPPT/GOT1/ENOPH1/DLD/APIP	5
BP	GO:0072521	purine-containing compound metabolic process	13/138	460/18862	3.38018e-05	0.00179297	0.00163556	AMPD2/ENO2/SUCLA2/ATP5PB/NUDT9/AK3/DLD/BPGM/PDHX/ATP5F1A/ATP6V1A/ATP5MG/ACAT1	13
BP	GO:0006839	mitochondrial transport	10/138	274/18862	3.43106e-05	0.00179297	0.00163556	SFXN3/SLC25A5/ATP5PB/MAIP1/MICU2/ATP5F1A/TIMM10B/MPC1/SLC25A4/ATP5MG	10
BP	GO:0015985	energy coupled proton transport, down electrochemical gradient	4/138	27/18862	4.22392e-05	0.00208799	0.00190467	ATP5PB/ATP5F1A/ATP6V1A/ATP5MG	4
BP	GO:0015986	ATP synthesis coupled proton transport	4/138	27/18862	4.22392e-05	0.00208799	0.00190467	ATP5PB/ATP5F1A/ATP6V1A/ATP5MG	4
BP	GO:0051453	regulation of intracellular pH	6/138	88/18862	4.5561e-05	0.00219292	0.00200039	ATP6AP2/ATP6V1E1/ATP6V1H/ATP6V1G1/ATP6V1A/ATP6V1D	6
BP	GO:0030641	regulation of cellular pH	6/138	95/18862	7.00748e-05	0.00328633	0.0029978	ATP6AP2/ATP6V1E1/ATP6V1H/ATP6V1G1/ATP6V1A/ATP6V1D	6
BP	GO:0007006	mitochondrial membrane organization	7/138	144/18862	9.19892e-05	0.00420621	0.00383692	SLC25A5/ATP5PB/MAIP1/ATP5F1A/TIMM10B/ATP5MG/GHITM	7
BP	GO:0006885	regulation of pH	6/138	103/18862	0.000109909	0.00490303	0.00447257	ATP6AP2/ATP6V1E1/ATP6V1H/ATP6V1G1/ATP6V1A/ATP6V1D	6
BP	GO:0009165	nucleotide biosynthetic process	9/138	264/18862	0.00014331	0.0062408	0.00569289	AMPD2/ATP5PB/AK3/DLD/PDHX/ATP5F1A/ATP6V1A/ATP5MG/ACAT1	9
BP	GO:1901293	nucleoside phosphate biosynthetic process	9/138	267/18862	0.000156	0.00663544	0.00605287	AMPD2/ATP5PB/AK3/DLD/PDHX/ATP5F1A/ATP6V1A/ATP5MG/ACAT1	9
BP	GO:0016241	regulation of macroautophagy	7/138	160/18862	0.000177236	0.00736738	0.00672055	ATP6V1E1/ATP6V1H/ATP6V1G1/ATP6V1A/ATP6V1D/LAMTOR3/SCOC	7
BP	GO:0006103	2-oxoglutarate metabolic process	3/138	16/18862	0.000200123	0.00800581	0.00730293	GOT1/DLD/PHYH	3
BP	GO:0030004	cellular monovalent inorganic cation homeostasis	6/138	115/18862	0.000201349	0.00800581	0.00730293	ATP6AP2/ATP6V1E1/ATP6V1H/ATP6V1G1/ATP6V1A/ATP6V1D	6
BP	GO:0006826	iron ion transport	5/138	79/18862	0.000284592	0.0110749	0.0101025	ATP6V1E1/ATP6V1H/ATP6V1G1/ATP6V1A/ATP6V1D	5
BP	GO:0009205	purine ribonucleoside triphosphate metabolic process	5/138	80/18862	0.000301798	0.0114997	0.0104901	ATP5PB/AK3/ATP5F1A/ATP6V1A/ATP5MG	5
BP	GO:0000041	transition metal ion transport	6/138	127/18862	0.000344399	0.0128552	0.0117266	ATP6V1E1/ATP6V1H/SLC30A9/ATP6V1G1/ATP6V1A/ATP6V1D	6
BP	GO:0009142	nucleoside triphosphate biosynthetic process	5/138	84/18862	0.000378625	0.0138501	0.0126341	ATP5PB/AK3/ATP5F1A/ATP6V1A/ATP5MG	5
BP	GO:0009083	branched-chain amino acid catabolic process	3/138	20/18862	0.000398756	0.0143005	0.0130449	AUH/DLD/ACAT1	3
BP	GO:0009144	purine nucleoside triphosphate metabolic process	5/138	86/18862	0.000422169	0.014849	0.0135453	ATP5PB/AK3/ATP5F1A/ATP6V1A/ATP5MG	5
BP	GO:0009199	ribonucleoside triphosphate metabolic process	5/138	87/18862	0.000445307	0.0153673	0.0140181	ATP5PB/AK3/ATP5F1A/ATP6V1A/ATP5MG	5
BP	GO:0016236	macroautophagy	9/138	311/18862	0.000479312	0.0162345	0.0148092	ATP6V1E1/ATP6V1H/ATP6V1G1/TSG101/ATP6V1A/GABARAPL2/ATP6V1D/LAMTOR3/SCOC	9
BP	GO:0006085	acetyl-CoA biosynthetic process	3/138	22/18862	0.000532934	0.017406	0.0158778	DLD/PDHX/ACAT1	3
BP	GO:0042776	mitochondrial ATP synthesis coupled proton transport	3/138	22/18862	0.000532934	0.017406	0.0158778	ATP5PB/ATP5F1A/ATP5MG	3
BP	GO:0009081	branched-chain amino acid metabolic process	3/138	23/18862	0.000609603	0.0195608	0.0178434	AUH/DLD/ACAT1	3
BP	GO:0043648	dicarboxylic acid metabolic process	5/138	96/18862	0.00069901	0.0220429	0.0201076	MDH1/GOT1/DLD/FH/PHYH	5
BP	GO:0006520	cellular amino acid metabolic process	9/138	331/18862	0.000748366	0.0228689	0.0208611	MARS2/AASDHPPT/GOT1/AUH/ENOPH1/DLD/APIP/ACAT1/PPA2	9
BP	GO:0006754	ATP biosynthetic process	4/138	56/18862	0.000750211	0.0228689	0.0208611	ATP5PB/ATP5F1A/ATP6V1A/ATP5MG	4
BP	GO:0055067	monovalent inorganic cation homeostasis	6/138	161/18862	0.00119831	0.0353627	0.032258	ATP6AP2/ATP6V1E1/ATP6V1H/ATP6V1G1/ATP6V1A/ATP6V1D	6
BP	GO:0036296	response to increased oxygen levels	3/138	29/18862	0.00121807	0.0353627	0.032258	ATP6V1G1/CAT/ATP6V1A	3
BP	GO:1902186	regulation of viral release from host cell	3/138	29/18862	0.00121807	0.0353627	0.032258	PML/VAPA/TSG101	3
BP	GO:0009141	nucleoside triphosphate metabolic process	5/138	109/18862	0.00123873	0.0354005	0.0322925	ATP5PB/AK3/ATP5F1A/ATP6V1A/ATP5MG	5
BP	GO:0009206	purine ribonucleoside triphosphate biosynthetic process	4/138	67/18862	0.00147149	0.0407782	0.037198	ATP5PB/ATP5F1A/ATP6V1A/ATP5MG	4
BP	GO:1901607	alpha-amino acid biosynthetic process	4/138	67/18862	0.00147149	0.0407782	0.037198	AASDHPPT/GOT1/ENOPH1/APIP	4
BP	GO:0009145	purine nucleoside triphosphate biosynthetic process	4/138	68/18862	0.00155469	0.0424407	0.0387146	ATP5PB/ATP5F1A/ATP6V1A/ATP5MG	4
BP	GO:0006879	cellular iron ion homeostasis	4/138	70/18862	0.0017308	0.0452263	0.0412556	ATP6V1G1/SKP1/ATP6V1A/NDFIP1	4
BP	GO:0046916	cellular transition metal ion homeostasis	5/138	118/18862	0.00176066	0.0452263	0.0412556	SLC30A9/ATP6V1G1/SKP1/ATP6V1A/NDFIP1	5
BP	GO:0019076	viral release from host cell	3/138	33/18862	0.00178037	0.0452263	0.0412556	PML/VAPA/TSG101	3
BP	GO:0035890	exit from host	3/138	33/18862	0.00178037	0.0452263	0.0412556	PML/VAPA/TSG101	3
BP	GO:0035891	exit from host cell	3/138	33/18862	0.00178037	0.0452263	0.0412556	PML/VAPA/TSG101	3
BP	GO:0051881	regulation of mitochondrial membrane potential	4/138	71/18862	0.00182385	0.0456961	0.0416842	NDUFS1/NNT/GOT1/PPA2	4
BP	GO:0043094	cellular metabolic compound salvage	3/138	34/18862	0.00194228	0.0480058	0.0437911	AMPD2/ENOPH1/APIP	3
BP	GO:0009201	ribonucleoside triphosphate biosynthetic process	4/138	73/18862	0.00202024	0.049267	0.0449415	ATP5PB/ATP5F1A/ATP6V1A/ATP5MG	4
BP	GO:0042407	cristae formation	3/138	35/18862	0.00211308	0.0508529	0.0463882	ATP5PB/ATP5F1A/ATP5MG	3
CC	GO:0005743	mitochondrial inner membrane	26/143	493/19520	2.35517e-15	6.0528e-13	5.03264e-13	SFXN3/NDUFS1/SLC25A5/ATP5PB/NNT/NDUFB5/MAIP1/HIGD1A/NDUFC2/MICU2/MRPS35/MRPL50/NDUFA5/ATP5F1A/TIMM10B/MPC1/SLC25A4/NDUFAF4/NDUFB6/ATP5MG/HCCS/MTCH2/CYCS/GHITM/UQCRFS1/SDHD	26
CC	GO:0005759	mitochondrial matrix	22/143	476/19520	5.63828e-12	7.24519e-10	6.02405e-10	MARS2/NDUFS1/SUCLA2/SLC25A5/ATP5PB/ISCA2/NUDT9/AUH/MAIP1/AK3/TRMT10C/MRPS35/DLD/PDHX/FH/MRPL50/ETFA/ATP5F1A/PDE12/GFM1/ACAT1/PPA2	22
CC	GO:0016469	proton-transporting two-sector ATPase complex	9/143	52/19520	1.32719e-10	1.13696e-08	9.45332e-09	ATP5PB/ATP6AP2/ATP6V1E1/ATP6V1H/ATP6V1G1/ATP5F1A/ATP6V1A/ATP5MG/ATP6V1D	9
CC	GO:0098800	inner mitochondrial membrane protein complex	12/143	142/19520	5.78136e-10	3.71453e-08	3.08846e-08	NDUFS1/ATP5PB/NDUFB5/NDUFC2/MICU2/NDUFA5/ATP5F1A/TIMM10B/NDUFB6/ATP5MG/UQCRFS1/SDHD	12
CC	GO:0098798	mitochondrial protein-containing complex	15/143	265/19520	1.07128e-09	5.5064e-08	4.57833e-08	NDUFS1/ATP5PB/NDUFB5/NDUFC2/TRMT10C/MICU2/MRPS35/MRPL50/NDUFA5/ATP5F1A/TIMM10B/NDUFB6/ATP5MG/UQCRFS1/SDHD	15
CC	GO:0070469	respirasome	10/143	103/19520	4.28067e-09	1.83356e-07	1.52452e-07	NDUFS1/NNT/NDUFB5/HIGD1A/NDUFC2/NDUFA5/NDUFB6/CYCS/UQCRFS1/SDHD	10
CC	GO:1990204	oxidoreductase complex	9/143	111/19520	1.265e-07	4.64437e-06	3.86159e-06	NDUFS1/NDUFB5/NDUFC2/DLD/PDHX/NDUFA5/NDUFB6/UQCRFS1/SDHD	9
CC	GO:0005746	mitochondrial respirasome	8/143	89/19520	2.91843e-07	9.37545e-06	7.79528e-06	NDUFS1/NNT/NDUFB5/NDUFC2/NDUFA5/NDUFB6/UQCRFS1/SDHD	8
CC	GO:0005774	vacuolar membrane	15/143	431/19520	6.58756e-07	1.77758e-05	1.47798e-05	DAGLB/TMEM79/VAPA/ATP6AP2/ATP6V1E1/ATP6V1H/ATP6V1G1/NDUFC2/ATP6V1A/ZNRF2/GABARAPL2/ATP6V1D/LAMTOR3/AP5M1/TMEM9B	15
CC	GO:0005765	lysosomal membrane	14/143	378/19520	7.6083e-07	1.77758e-05	1.47798e-05	DAGLB/TMEM79/VAPA/ATP6AP2/ATP6V1E1/ATP6V1H/ATP6V1G1/NDUFC2/ATP6V1A/ZNRF2/ATP6V1D/LAMTOR3/AP5M1/TMEM9B	14
CC	GO:0098852	lytic vacuole membrane	14/143	378/19520	7.6083e-07	1.77758e-05	1.47798e-05	DAGLB/TMEM79/VAPA/ATP6AP2/ATP6V1E1/ATP6V1H/ATP6V1G1/NDUFC2/ATP6V1A/ZNRF2/ATP6V1D/LAMTOR3/AP5M1/TMEM9B	14
CC	GO:0033176	proton-transporting V-type ATPase complex	5/143	27/19520	1.3946e-06	2.98677e-05	2.48337e-05	ATP6AP2/ATP6V1H/ATP6V1G1/ATP6V1A/ATP6V1D	5
CC	GO:0098803	respiratory chain complex	7/143	87/19520	3.50178e-06	6.92275e-05	5.75596e-05	NDUFS1/NDUFB5/NDUFC2/NDUFA5/NDUFB6/UQCRFS1/SDHD	7
CC	GO:0033178	proton-transporting two-sector ATPase complex, catalytic domain	4/143	18/19520	7.80205e-06	0.000143223	0.000119084	ATP6V1E1/ATP6V1H/ATP5F1A/ATP6V1A	4
CC	GO:0005747	mitochondrial respiratory chain complex I	5/143	50/19520	3.19678e-05	0.000483278	0.000401825	NDUFS1/NDUFB5/NDUFC2/NDUFA5/NDUFB6	5
CC	GO:0030964	NADH dehydrogenase complex	5/143	50/19520	3.19678e-05	0.000483278	0.000401825	NDUFS1/NDUFB5/NDUFC2/NDUFA5/NDUFB6	5
CC	GO:0045271	respiratory chain complex I	5/143	50/19520	3.19678e-05	0.000483278	0.000401825	NDUFS1/NDUFB5/NDUFC2/NDUFA5/NDUFB6	5
CC	GO:0045239	tricarboxylic acid cycle enzyme complex	3/143	14/19520	0.000132082	0.00188584	0.00156799	SUCLA2/DLD/FH	3
CC	GO:0016471	vacuolar proton-transporting V-type ATPase complex	3/143	18/19520	0.0002898	0.00391993	0.00325925	ATP6AP2/ATP6V1H/ATP6V1G1	3
CC	GO:0005758	mitochondrial intermembrane space	5/143	83/19520	0.000361017	0.00463907	0.00385718	NDUFS1/MICU2/CAT/TIMM10B/CYCS	5
CC	GO:0005777	peroxisome	6/143	136/19520	0.00050101	0.00585271	0.00486627	HSDL2/IDI1/CAT/PNPLA8/ISOC1/PHYH	6
CC	GO:0042579	microbody	6/143	136/19520	0.00050101	0.00585271	0.00486627	HSDL2/IDI1/CAT/PNPLA8/ISOC1/PHYH	6
CC	GO:0005753	mitochondrial proton-transporting ATP synthase complex	3/143	22/19520	0.000535314	0.00598155	0.00497339	ATP5PB/ATP5F1A/ATP5MG	3
CC	GO:0031970	organelle envelope lumen	5/143	93/19520	0.000609534	0.00629464	0.00523372	NDUFS1/MICU2/CAT/TIMM10B/CYCS	5
CC	GO:0045259	proton-transporting ATP synthase complex	3/143	23/19520	0.000612319	0.00629464	0.00523372	ATP5PB/ATP5F1A/ATP5MG	3
CC	GO:0030667	secretory granule membrane	8/143	305/19520	0.00186524	0.0184372	0.0153297	VAPA/ATP6AP2/CD59/NDUFC2/RAB18/SVIP/ATP6V1D/LAMTOR3	8
CC	GO:0070821	tertiary granule membrane	4/143	73/19520	0.00203209	0.0193425	0.0160825	ATP6AP2/CD59/SVIP/LAMTOR3	4
CC	GO:0140268	endoplasmic reticulum-plasma membrane contact site	2/143	10/19520	0.0023076	0.0211804	0.0176106	GRAMD1A/SACM1L	2
CC	GO:0000276	mitochondrial proton-transporting ATP synthase complex, coupling factor F(o)	2/143	11/19520	0.00280687	0.0240482	0.019995	ATP5PB/ATP5MG	2
CC	GO:0031300	intrinsic component of organelle membrane	9/143	402/19520	0.00287959	0.0240482	0.019995	SFXN3/GRAMD1A/SYPL1/HACD3/IER3IP1/MPC1/SLC25A4/TMEM33/GHITM	9
CC	GO:0044232	organelle membrane contact site	3/143	39/19520	0.00290075	0.0240482	0.019995	GRAMD1A/SACM1L/TMX2	3
CC	GO:0016592	mediator complex	3/143	40/19520	0.00311928	0.0250517	0.0208294	MED15/CCNC/MED21	3
CC	GO:0032592	integral component of mitochondrial membrane	4/143	85/19520	0.00353352	0.0275186	0.0228805	SFXN3/MPC1/SLC25A4/GHITM	4
CC	GO:0098573	intrinsic component of mitochondrial membrane	4/143	86/19520	0.00368513	0.0278552	0.0231604	SFXN3/MPC1/SLC25A4/GHITM	4
CC	GO:0045263	proton-transporting ATP synthase complex, coupling factor F(o)	2/143	14/19520	0.0045777	0.0336134	0.0279481	ATP5PB/ATP5MG	2
CC	GO:0030134	COPII-coated ER to Golgi transport vesicle	4/143	94/19520	0.00505969	0.0361206	0.0300327	TMED7/CD59/SAR1B/IER3IP1	4
CC	GO:0030127	COPII vesicle coat	2/143	15/19520	0.0052567	0.0365128	0.0303588	TMED7/SAR1B	2
CC	GO:0031301	integral component of organelle membrane	8/143	371/19520	0.00608907	0.0411814	0.0342405	SFXN3/SYPL1/HACD3/IER3IP1/MPC1/SLC25A4/TMEM33/GHITM	8
CC	GO:0031304	intrinsic component of mitochondrial inner membrane	3/143	55/19520	0.00764803	0.0491386	0.0408566	SFXN3/MPC1/GHITM	3
CC	GO:0031305	integral component of mitochondrial inner membrane	3/143	55/19520	0.00764803	0.0491386	0.0408566	SFXN3/MPC1/GHITM	3
CC	GO:0000159	protein phosphatase type 2A complex	2/143	19/19520	0.00839853	0.0526444	0.0437715	PPP2CA/CYCS	2
MF	GO:0015078	proton transmembrane transporter activity	9/136	124/18337	3.59031e-07	5.10858e-05	4.48991e-05	ATP5PB/ATP6V1E1/NNT/ATP6V1H/ATP6V1G1/ATP5F1A/ATP6V1A/ATP5MG/ATP6V1D	9
MF	GO:0044769	ATPase activity, coupled to transmembrane movement of ions, rotational mechanism	5/136	22/18337	4.95978e-07	5.10858e-05	4.48991e-05	ATP6V1E1/ATP6V1H/ATP6V1G1/ATP6V1A/ATP6V1D	5
MF	GO:0046961	proton-transporting ATPase activity, rotational mechanism	5/136	22/18337	4.95978e-07	5.10858e-05	4.48991e-05	ATP6V1E1/ATP6V1H/ATP6V1G1/ATP6V1A/ATP6V1D	5
MF	GO:0016651	oxidoreductase activity, acting on NAD(P)H	8/136	102/18337	9.08758e-07	7.02016e-05	6.16999e-05	NDUFS1/NNT/NDUFB5/NDUFC2/DLD/NDUFA5/NDUFB6/SELENOT	8
MF	GO:0046933	proton-transporting ATP synthase activity, rotational mechanism	4/136	17/18337	6.39233e-06	0.000395046	0.000347204	ATP5PB/ATP5F1A/ATP6V1A/ATP5MG	4
MF	GO:0009055	electron transfer activity	8/136	138/18337	8.79415e-06	0.000452899	0.000398051	NDUFS1/NDUFB5/NDUFC2/NDUFA5/ETFA/NDUFB6/UQCRFS1/SDHD	8
MF	GO:0019829	ATPase-coupled cation transmembrane transporter activity	5/136	44/18337	1.79438e-05	0.000620074	0.000544981	ATP6V1E1/ATP6V1H/ATP6V1G1/ATP6V1A/ATP6V1D	5
MF	GO:0003954	NADH dehydrogenase activity	5/136	45/18337	2.00671e-05	0.000620074	0.000544981	NDUFS1/NDUFB5/NDUFC2/NDUFA5/NDUFB6	5
MF	GO:0008137	NADH dehydrogenase (ubiquinone) activity	5/136	45/18337	2.00671e-05	0.000620074	0.000544981	NDUFS1/NDUFB5/NDUFC2/NDUFA5/NDUFB6	5
MF	GO:0050136	NADH dehydrogenase (quinone) activity	5/136	45/18337	2.00671e-05	0.000620074	0.000544981	NDUFS1/NDUFB5/NDUFC2/NDUFA5/NDUFB6	5
MF	GO:0042625	ATPase-coupled ion transmembrane transporter activity	5/136	46/18337	2.2381e-05	0.000628701	0.000552563	ATP6V1E1/ATP6V1H/ATP6V1G1/ATP6V1A/ATP6V1D	5
MF	GO:0015252	proton channel activity	4/136	24/18337	2.74124e-05	0.000656682	0.000577155	ATP5PB/ATP5F1A/ATP6V1A/ATP5MG	4
MF	GO:0003955	NAD(P)H dehydrogenase (quinone) activity	5/136	48/18337	2.76274e-05	0.000656682	0.000577155	NDUFS1/NDUFB5/NDUFC2/NDUFA5/NDUFB6	5
MF	GO:0016655	oxidoreductase activity, acting on NAD(P)H, quinone or similar compound as acceptor	5/136	60/18337	8.2062e-05	0.00181123	0.00159188	NDUFS1/NDUFB5/NDUFC2/NDUFA5/NDUFB6	5
MF	GO:0016836	hydro-lyase activity	5/136	64/18337	0.000111877	0.00230468	0.00202557	ENO2/AUH/HACD3/FH/APIP	5
MF	GO:0016835	carbon-oxygen lyase activity	5/136	79/18337	0.0003026	0.00584396	0.00513624	ENO2/AUH/HACD3/FH/APIP	5
MF	GO:0051537	2 iron, 2 sulfur cluster binding	3/136	22/18337	0.000554241	0.0100742	0.00885413	NDUFS1/ISCA2/UQCRFS1	3
MF	GO:0016829	lyase activity	7/136	194/18337	0.000615918	0.0105733	0.0092928	ENO2/GOT1/AUH/HACD3/FH/APIP/HCCS	7
MF	GO:0016874	ligase activity	6/136	163/18337	0.00136644	0.0222227	0.0195314	MARS2/SUCLA2/ATP5PB/ATP5F1A/ATP6V1A/ATP5MG	6
MF	GO:0051536	iron-sulfur cluster binding	4/136	67/18337	0.00154562	0.0227427	0.0199885	POLE/NDUFS1/ISCA2/UQCRFS1	4
MF	GO:0051540	metal cluster binding	4/136	67/18337	0.00154562	0.0227427	0.0199885	POLE/NDUFS1/ISCA2/UQCRFS1	4
MF	GO:0005347	ATP transmembrane transporter activity	2/136	11/18337	0.00287446	0.040373	0.0354837	SLC25A5/SLC25A4	2
MF	GO:0016668	oxidoreductase activity, acting on a sulfur group of donors, NAD(P) as acceptor	2/136	12/18337	0.00343263	0.045835	0.0402842	DLD/SELENOT	2
MF	GO:0051117	ATPase binding	4/136	85/18337	0.00368551	0.045835	0.0402842	ATP6V1E1/ATP6V1G1/GABARAPL2/SVIP	4
MF	GO:0051539	4 iron, 4 sulfur cluster binding	3/136	42/18337	0.00370833	0.045835	0.0402842	POLE/NDUFS1/ISCA2	3

## Sheet: Supplementary Table 3
Supplementary Table 3. KEGG analysis of the correlated genes.
ID	Description	GeneRatio	BgRatio	pvalue	p.adjust	qvalue	geneID	Count
hsa00190	Oxidative phosphorylation	17/80	134/8163	6.89284e-15	1.17867e-12	9.94019e-13	4719/515/529/51606/4711/9550/4718/4698/498/523/4712/10632/51382/54205/27068/7386/6392	17
hsa05208	Chemical carcinogenesis - reactive oxygen species	13/80	223/8163	2.07762e-07	1.77636e-05	1.49807e-05	5338/4719/292/515/4711/4718/847/4698/498/291/4712/7386/6392	13
hsa05415	Diabetic cardiomyopathy	12/80	203/8163	5.52164e-07	3.14733e-05	2.65426e-05	4719/292/515/4711/4718/4698/498/51660/291/4712/7386/6392	12
hsa01200	Carbon metabolism	9/80	115/8163	1.60219e-06	6.84936e-05	5.77631e-05	2026/8803/4190/2805/1738/2271/847/38/6392	9
hsa05012	Parkinson disease	12/80	266/8163	9.35166e-06	0.000267114	0.000225267	4719/292/515/4711/4718/4698/498/291/4712/54205/7386/6392	12
hsa00020	Citrate cycle (TCA cycle)	5/80	30/8163	9.37241e-06	0.000267114	0.000225267	8803/4190/1738/2271/6392	5
hsa05020	Prion disease	12/80	273/8163	1.21685e-05	0.00029726	0.00025069	4719/292/515/4711/4718/4698/498/291/4712/54205/7386/6392	12
hsa04714	Thermogenesis	11/80	232/8163	1.43446e-05	0.000306616	0.00025858	4719/515/4711/4718/4698/498/29078/4712/10632/7386/6392	11
hsa05016	Huntington disease	12/80	306/8163	3.79273e-05	0.000720619	0.000607725	4719/292/515/4711/4718/4698/498/291/4712/54205/7386/6392	12
hsa05110	Vibrio cholerae infection	5/80	50/8163	0.00011956	0.00183025	0.00154351	529/51606/9550/523/51382	5
hsa04966	Collecting duct acid secretion	4/80	27/8163	0.000126463	0.00183025	0.00154351	529/9550/523/51382	4
hsa04932	Non-alcoholic fatty liver disease	8/80	155/8163	0.000128438	0.00183025	0.00154351	4719/4711/4718/4698/4712/54205/7386/6392	8
hsa00630	Glyoxylate and dicarboxylate metabolism	4/80	30/8163	0.000193118	0.00254024	0.00214228	4190/1738/847/38	4
hsa05010	Alzheimer disease	12/80	384/8163	0.000327232	0.0039969	0.00337074	4719/292/515/4711/4718/4698/498/291/4712/54205/7386/6392	12
hsa05120	Epithelial cell signaling in Helicobacter pylori infection	5/80	70/8163	0.000586225	0.00668296	0.00563598	529/51606/9550/523/51382	5
hsa05022	Pathways of neurodegeneration - multiple diseases	13/80	476/8163	0.000661605	0.00707091	0.00596315	4719/292/515/4711/4718/847/4698/498/291/4712/54205/7386/6392	13
hsa05014	Amyotrophic lateral sclerosis	11/80	364/8163	0.000783794	0.00763361	0.0064377	4719/515/4711/4718/847/4698/498/4712/54205/7386/6392	11
hsa04150	mTOR signaling pathway	7/80	156/8163	0.000803538	0.00763361	0.0064377	529/51606/1977/9550/523/51382/8649	7
hsa04721	Synaptic vesicle cycle	5/80	78/8163	0.000962059	0.00865854	0.00730206	529/51606/9550/523/51382	5
hsa00620	Pyruvate metabolism	4/80	47/8163	0.00110789	0.00947246	0.00798847	4190/1738/2271/38	4
hsa00270	Cysteine and methionine metabolism	4/80	51/8163	0.00150692	0.0122706	0.0103483	4190/2805/58478/51074	4
hsa05323	Rheumatoid arthritis	5/80	93/8163	0.00211297	0.0164235	0.0138506	529/51606/9550/523/51382	5
hsa04723	Retrograde endocannabinoid signaling	6/80	148/8163	0.00320304	0.0238139	0.0200831	221955/4719/4711/4718/4698/4712	6
hsa04145	Phagosome	6/80	152/8163	0.00365457	0.0250607	0.0211346	7059/529/51606/9550/523/51382	6
hsa04136	Autophagy - other	3/80	32/8163	0.00366385	0.0250607	0.0211346	115201/5515/11345	3
hsa05164	Influenza A	6/80	171/8163	0.00647195	0.0425655	0.0358971	5371/6773/292/8766/291/54205	6

## Sheet: Supplementary Table 4
Supplementary Table 4. 234 differentially expressed genes (DEGs).
gene	lowMean	highMean	logFC	pValue	fdr
AL353593.3	0.0481531	0.0119781	-2.00723	0.000113327	0.000342189
AC008591.1	0.0150451	0.00362306	-2.05402	6.80917e-05	0.000219533
SLC12A3	1.08326	5.01342	2.21041	0.00240706	0.00497743
CDH18	0.0464206	0.00567995	-3.03081	0.00334459	0.00663734
AL591222.1	0.0179799	0.00374987	-2.26147	0.000979718	0.00225744
AC122688.4	0.0385421	0.00765827	-2.33134	3.7694e-05	0.000131505
AC243967.3	0.0960698	0.0139865	-2.78005	0.000213765	0.000593103
LINC01992	0.0225744	0.00516642	-2.12745	0.000128114	0.000380708
LINC00868	0.0741586	0.0168114	-2.14117	4.35405e-07	2.72958e-06
AL589826.2	0.154227	0.0204398	-2.9156	0.000744032	0.00177091
ACOT12	0.0212554	0.086482	2.02457	0.0184837	0.0296924
SCNN1G	3.68966	0.827758	-2.15621	0.00353703	0.0069634
AL358394.1	0.424113	0.088506	-2.2606	1.13831e-08	1.16732e-07
RPSAP2	0.130009	0.0225578	-2.52692	0.00278974	0.00565825
DCXR-DT	0.0331125	0.133484	2.01122	0.016821	0.0273526
SLITRK1	0.0321192	0.00675858	-2.24864	0.00367732	0.00720397
TPH2	0.0235123	0.00414098	-2.50537	0.000287153	0.000767431
UBTFL9	0.146306	0.0293348	-2.31831	0.00364496	0.0071496
GOLGA8F	0.0101361	0.00202231	-2.32543	5.27967e-07	3.23224e-06
DPRXP2	0.135602	0.030483	-2.1533	5.90525e-05	0.000193914
LINC02346	0.0127714	0.00283333	-2.17235	0.000135487	0.000400076
TNNT1	2.13042	0.521215	-2.03118	9.28555e-09	9.82673e-08
AC016134.1	0.0700459	0.0151731	-2.20679	0.00396311	0.0076917
RPL12P10	0.738892	0.180196	-2.03579	1.65582e-05	6.43876e-05
LRRC15	1.32602	0.255597	-2.37517	7.82007e-07	4.54812e-06
ZPLD1	0.443262	0.105041	-2.07721	0.00220924	0.00461562
FOXI2	0.146971	2.76279	4.23252	0.00101785	0.00233508
RPS4XP5	0.113554	0.0186305	-2.60764	0.00126934	0.00283646
TLX2	0.0258495	0.00639637	-2.01481	0.00138102	0.00305633
PRKAR2B-AS1	0.0818568	0.0190108	-2.10628	3.57219e-05	0.000125711
ZFHX4-AS1	0.0280789	0.00540251	-2.37779	0.00103269	0.00236471
CALY	0.255707	0.0424267	-2.59145	2.31811e-06	1.16606e-05
PLPPR1	0.117475	0.752795	2.6799	5.12374e-11	1.13462e-09
AC007638.1	0.0691848	0.0127119	-2.44428	1.72508e-06	9.00741e-06
NEUROD2	0.0529292	0.0125354	-2.07806	3.97829e-06	1.86159e-05
HNRNPKP5	0.259693	0.0545554	-2.25101	0.000132953	0.00039362
ATP6V0D2	0.251901	17.7606	6.13968	5.29471e-06	2.38805e-05
AL360169.3	0.152438	1.06714	2.80746	0.00371807	0.0072746
SLC13A2	0.130201	1.53091	3.55558	6.78631e-11	1.44103e-09
GJD4	0.055908	0.0115516	-2.27496	0.000201662	0.000563719
AC116003.1	0.0822956	0.0149078	-2.46475	0.00208154	0.00437897
AL355578.1	0.0959727	0.0228023	-2.07345	9.07679e-07	5.16412e-06
AC026355.3	0.186958	0.0368429	-2.34326	0.000128475	0.000381666
GRAMD4P3	0.0500831	0.0117018	-2.0976	0.00781994	0.0139753
AC009518.1	0.0901414	0.0133887	-2.75117	3.1033e-13	1.38693e-11
CYP17A1	0.15302	3.08095	4.33158	6.74104e-12	1.98339e-10
AC090983.1	0.0219904	0.00541936	-2.02068	0.00125002	0.00279957
LPAR3	0.405437	0.0282924	-3.84099	0.00513887	0.00968351
AL391005.1	0.0407596	0.196953	2.27264	0.00769385	0.01378
CYP4F8	0.00859511	0.00208784	-2.0415	0.0138112	0.0230447
MCCD1	0.257131	2.56217	3.31679	1.96605e-06	1.01001e-05
AQP2	0.47503	2.15563	2.18202	0.00664546	0.0121243
AC012363.2	0.23417	0.0324942	-2.8493	0.00172589	0.00371923
CRNN	0.0687699	0.0129348	-2.41052	5.67289e-07	3.43853e-06
AL391097.2	0.212905	0.0411462	-2.37138	1.38692e-07	1.01208e-06
AL160408.1	0.0110467	0.0656269	2.57067	0.0285954	0.0436414
AC092757.1	0.350651	0.0617967	-2.50443	6.70421e-07	3.97608e-06
AC010329.1	0.00374549	0.0331835	3.14724	0.0266582	0.0409779
DYTN	0.0189085	0.00384599	-2.29761	6.12412e-07	3.67272e-06
CACNG2	0.0326044	0.00699612	-2.22044	0.000701171	0.00168263
FER1L6	0.0357539	0.287373	3.00675	1.18339e-05	4.81001e-05
AC004687.3	0.0248135	0.00542657	-2.19302	1.07761e-08	1.11556e-07
BCAR4	0.0622411	0.0149053	-2.06205	0.0135811	0.022701
AC087894.3	0.0475404	0.0102044	-2.21996	5.88285e-07	3.54609e-06
AC009088.4	0.274817	0.0590089	-2.21946	1.84977e-05	7.08997e-05
AC022523.1	0.116208	0.0218018	-2.41419	0.0137553	0.0229582
AC113348.3	0.0861576	0.0196458	-2.13276	0.000231625	0.000636007
LYPD6B	0.0949845	0.910243	3.26049	0.00114845	0.00259746
MYOG	0.106085	0.0246278	-2.10686	1.12245e-05	4.59655e-05
AL078602.1	0.0193021	0.00446153	-2.11315	0.000130614	0.000387395
COPDA1	0.397889	0.0645997	-2.62276	0.000373638	0.000969026
EGFL6	1.50899	0.36982	-2.02869	0.000449803	0.00113977
LMO1	0.86115	0.211295	-2.027	8.59628e-10	1.27545e-08
WFDC10B	0.375954	0.0743858	-2.33746	1.78171e-16	2.01053e-14
AC104066.3	0.0622414	0.0155289	-2.00291	1.2729e-07	9.39786e-07
CYP2T3P	0.173218	0.0393849	-2.13688	6.62759e-06	2.90254e-05
EPB41L4B	0.112927	0.490114	2.11773	0.00773698	0.013844
AC007342.5	0.0483581	0.227249	2.23245	0.00286415	0.00578963
RPTN	0.233019	0.0123472	-4.23819	0.00650852	0.0119113
AC006348.1	0.0836992	0.0166299	-2.33143	0.00417474	0.00805888
ROS1	0.13588	0.0268602	-2.33879	0.000177854	0.000505613
MAGEC3	0.179099	0.0285878	-2.64729	7.55007e-07	4.40558e-06
Z97200.1	0.286371	0.0691152	-2.05081	4.81936e-13	2.04524e-11
RNU6-758P	0.636461	0.15689	-2.02032	0.000110703	0.000335297
INPP5J	0.334845	5.39423	4.00985	0.018576	0.0298181
LINC01656	0.095906	0.0167038	-2.52145	2.86449e-10	4.98023e-09
BCL9P1	0.0507917	0.0111982	-2.18132	6.09235e-06	2.69741e-05
LRRC74B	0.0299154	0.00735802	-2.0235	9.51922e-05	0.000294064
S100G	2.65635	0.644638	-2.04288	5.85248e-05	0.000192567
AC009961.2	0.554253	0.0942409	-2.55612	1.02088e-05	4.2318e-05
LINC01989	0.0874883	0.0191709	-2.19017	4.80501e-06	2.19816e-05
ANXA8	0.106631	0.0209452	-2.34793	0.000308821	0.000817564
AL139354.1	0.126703	0.029799	-2.08812	0.000112978	0.000341205
OTC	0.0270614	0.180467	2.73743	0.0126809	0.0213697
NKX2-5	0.204141	0.0384158	-2.4098	0.000101251	0.000310402
AC124067.3	0.0424224	0.0090584	-2.2275	7.38132e-06	3.18994e-05
METTL11B	0.0333876	0.00811516	-2.04062	0.000139354	0.00040967
AL031587.1	0.16653	0.0372308	-2.16122	3.82863e-07	2.44442e-06
Z95114.2	0.0702373	0.0167536	-2.06776	0.00417607	0.00806092
FOXI1	0.0642466	14.4624	7.81448	0.0180608	0.0291101
DNAH8-AS1	0.143534	0.0160675	-3.15918	1.49653e-05	5.89957e-05
AC004990.1	0.0388134	0.008199	-2.24304	1.91188e-05	7.29103e-05
CRX	0.075305	0.0163039	-2.20752	0.000347447	0.000908955
GALNTL5	0.0326846	0.00687174	-2.24986	0.000123021	0.000368079
AC012103.1	0.054414	0.0123754	-2.1365	0.00721299	0.013021
AC109466.1	0.0313545	0.00541015	-2.53493	4.85208e-08	4.07946e-07
NR0B2	0.0348311	3.03354	6.44448	4.05835e-06	1.89484e-05
AC017006.2	0.304898	0.0665615	-2.19557	1.59888e-05	6.24788e-05
OR7E122P	0.0310367	0.00686184	-2.17731	2.04353e-06	1.04397e-05
UBE3AP2	0.0270602	0.00645677	-2.06729	0.00576259	0.0107133
IL20RB-AS1	0.227122	0.0564127	-2.00937	6.52985e-05	0.000211524
LINC00922	0.26907	0.028685	-3.22961	1.68811e-05	6.55126e-05
FOXG1	0.0874075	0.0199736	-2.12967	0.00237757	0.00492503
AL022326.1	0.131118	0.0298009	-2.13744	2.21193e-05	8.27564e-05
PACRG	0.476759	2.67815	2.4899	5.23093e-05	0.00017505
AC018521.3	0.103329	0.0254796	-2.01983	0.000102219	0.000312949
LINC01583	0.100944	0.019996	-2.33578	9.20303e-10	1.3495e-08
NANOG	0.0369259	0.00857657	-2.10616	0.000316529	0.000836091
HS6ST3	0.101495	0.82195	3.01764	3.28638e-05	0.000116911
CLDN8	0.0770494	9.73887	6.98183	0.000247841	0.000674623
EPYC	0.399198	0.0677086	-2.55969	0.00396722	0.00769917
AL162293.1	0.0753204	0.0119158	-2.66017	2.81563e-05	0.000102252
AC007342.9	0.0498726	0.219199	2.13592	0.000603339	0.00147686
NFE4	0.936098	0.0961293	-3.28361	3.69236e-06	1.74201e-05
GOLGA6B	0.0342883	0.00790382	-2.1171	0.00230032	0.00478758
SLC35G3	0.138894	0.030751	-2.17528	0.00134979	0.0029935
NLRP9P1	0.0418203	0.00956823	-2.12788	0.0138941	0.0231656
LINC01304	0.0174654	0.00406779	-2.10218	0.000296228	0.000788762
SREK1IP1P1	0.279767	0.0430297	-2.70082	0.005829	0.0108265
AP003327.2	0.0996297	0.0181747	-2.45464	0.021074	0.0333101
AC148477.4	0.156791	1.01598	2.69595	0.000666883	0.00161019
AL928921.1	0.0415712	0.447326	3.42767	5.53178e-05	0.000183479
CWH43	0.231177	2.00308	3.11515	1.20275e-08	1.22361e-07
KERA	0.129006	0.0178431	-2.854	0.002392	0.00495076
AC090403.1	0.0807697	0.0172946	-2.22349	0.000373791	0.000969178
AGXT	0.293094	1.59768	2.44654	3.48813e-05	0.000123151
AC011467.1	0.120522	0.0232708	-2.37271	0.00718337	0.0129731
IGHV2-70	24.4319	3.88731	-2.65192	0.00510336	0.00962562
AC021739.1	0.584718	0.115849	-2.33549	0.000123111	0.000368258
AP004147.1	0.0249029	0.00600871	-2.05119	5.68671e-08	4.67574e-07
SCGB1A1	0.0952808	0.0233321	-2.02987	7.53915e-05	0.000240098
AL161431.1	0.531712	0.12274	-2.11504	2.87316e-05	0.000104058
ACTL6B	0.076267	0.0112558	-2.76039	6.72548e-05	0.000217144
DUSP15	0.642113	3.20016	2.31724	0.00022956	0.00063122
SLC9A4	0.0230596	0.296191	3.68309	0.00460027	0.00878533
LINC01305	0.0423192	0.00706228	-2.58311	1.40539e-08	1.39884e-07
AQP5	0.0358018	0.331681	3.21169	0.00714774	0.0129173
LINC00466	0.0146693	0.00280952	-2.3844	6.578e-05	0.000212896
AC120498.4	0.246345	1.08446	2.13823	0.00989344	0.0172008
STMN2	1.36946	0.231149	-2.56671	1.60043e-06	8.44123e-06
AQP6	0.0906749	14.2644	7.2975	0.000299646	0.000796569
AC007342.4	0.0558779	0.262887	2.23409	0.000116456	0.000350452
AC020765.6	0.0184915	0.00378722	-2.28765	4.67318e-06	2.14551e-05
ARLNC1	0.040163	0.0090901	-2.1435	1.23082e-06	6.73042e-06
AC007608.4	0.0898118	0.0207017	-2.11716	1.19893e-07	8.93492e-07
AL359704.2	0.509229	10.9994	4.43297	6.31281e-10	9.81652e-09
PAPPA2	0.26861	1.13451	2.07849	0.000692787	0.00166536
LCN1	0.75515	0.0738449	-3.35419	4.49575e-07	2.80694e-06
TLCD3B	0.341602	0.0673244	-2.34311	6.95557e-08	5.55766e-07
HEPACAM2	0.0359698	8.8601	7.94439	0.0165174	0.0269081
AC008868.1	0.0993223	0.0224853	-2.14314	0.0204277	0.0324108
OR9A4	0.0752137	0.0176535	-2.09104	9.27804e-07	5.26303e-06
CCR12P	0.0348848	0.00824305	-2.08135	0.000396007	0.00101942
AC007342.8	0.0351154	0.160402	2.19152	0.000722352	0.00172769
AL845552.1	0.400896	0.0842164	-2.25106	0.00133775	0.00297018
GREM2	0.767066	0.0643152	-3.57612	0.000138637	0.000407864
TMPOP1	0.0786797	0.0195454	-2.00917	0.00135137	0.00299634
ADGRF1	0.127172	0.99663	2.97027	0.00781747	0.0139717
LINC01198	0.0211511	0.00417857	-2.33965	0.0096534	0.0168346
AC020558.5	0.093853	0.0224793	-2.06181	1.07966e-06	6.01328e-06
SLC22A8	0.208819	0.9925	2.24881	6.04996e-09	6.81912e-08
KRT13	0.777949	0.0890221	-3.12744	0.0136608	0.0228173
LINC01492	0.0315727	0.00573258	-2.46142	0.0001952	0.000547943
AC073065.1	0.03155	0.00627738	-2.32941	0.000972263	0.00224255
SLC9A2	0.120463	0.736106	2.61132	1.34396e-06	7.26774e-06
LINC01405	0.0525861	0.00922018	-2.51182	9.76289e-07	5.51047e-06
AC126121.2	0.333456	0.0722841	-2.20574	0.000300816	0.000799318
FDCSP	22.2345	1.87466	-3.5681	1.59572e-05	6.23988e-05
SERPINA7	0.0745961	0.757023	3.34317	1.69196e-05	6.56455e-05
CTXN3	0.533277	2.21071	2.05155	1.11437e-08	1.14757e-07
ATP4B	0.0281982	0.120615	2.09674	0.000403059	0.00103567
RPL10P2	0.333538	0.0549605	-2.60138	6.07176e-05	0.000198695
CIDEC	1.52082	0.337962	-2.16992	0.000211494	0.000587912
AC092793.1	0.0370591	0.00827337	-2.16328	2.36736e-10	4.21291e-09
TMPRSS2	0.186157	2.49752	3.74591	2.02604e-07	1.40473e-06
NUPR2	0.202645	2.51927	3.63598	0.00936024	0.0163918
PCAT5	0.100183	0.0191098	-2.39026	0.000667941	0.00161203
GPR78	0.0159693	0.00382513	-2.06172	2.57164e-12	8.76564e-11
AC011352.2	0.0627284	0.0151174	-2.05291	1.90147e-12	6.79637e-11
AC135012.1	0.0214076	0.00447538	-2.25805	0.000531698	0.00132238
BPIFA2	0.0456084	0.306523	2.74862	0.0026592	0.00542833
CHAT	0.43897	0.0772291	-2.50691	5.5306e-06	2.48418e-05
CYP4F26P	0.031842	0.00792957	-2.00561	3.73342e-05	0.000130435
AC005906.2	0.0218838	0.00524511	-2.06082	0.000484636	0.00121819
AC004817.3	0.380351	0.0914158	-2.05681	1.13144e-12	4.36169e-11
WASF3-AS1	0.053897	0.0123364	-2.12728	0.000283717	0.00075964
GABRA3	0.174642	0.0295153	-2.56487	4.43102e-06	2.04999e-05
LINC01570	0.0421127	0.00962356	-2.12961	3.28395e-05	0.000116851
LINC00710	0.0238216	0.00533271	-2.15933	0.00574769	0.010689
TNNT3	2.17961	0.29251	-2.89751	6.64336e-05	0.000214799
GGT6	0.272087	1.67291	2.62022	9.83491e-10	1.42759e-08
OR10H5	0.0230208	0.00573484	-2.00511	3.54423e-05	0.000124923
DNTT	0.0169887	0.313379	4.20526	0.017679	0.0285791
AC105101.1	0.0560593	0.0119508	-2.22985	1.90553e-06	9.83442e-06
MMP13	0.855206	0.0974876	-3.13298	8.39691e-08	6.54768e-07
AMBP	1.05689	9.51897	3.17098	0.00596098	0.0110347
FMR1NB	0.0942004	0.0163672	-2.52492	0.000247252	0.000673454
CNGA3	0.0245152	0.00528885	-2.21265	0.0174541	0.0282636
SIX3	0.222698	0.0526706	-2.08002	1.14508e-05	4.67169e-05
AC006262.2	0.342126	0.0749627	-2.19028	7.14065e-14	3.99822e-12
OACYLP	5.04291	0.407498	-3.62939	2.70454e-06	1.33179e-05
AC011471.2	0.29213	0.0704096	-2.05277	2.14073e-05	8.04808e-05
SH3GL2	0.327434	1.76856	2.4333	0.019158	0.030632
AL359976.1	0.0353553	0.007299	-2.27615	0.0114898	0.0195857
PIK3C2G	0.0229055	0.212561	3.21411	0.000200214	0.000560364
AC008567.1	0.134304	0.0296129	-2.18121	0.00463317	0.00883898
AL035661.1	0.456497	4.29447	3.2338	0.000723691	0.00173047
AP000753.1	0.159351	0.0279051	-2.51361	0.00332443	0.0066009
AJ239328.1	0.0472363	0.0107639	-2.1337	5.54506e-10	8.785e-09
SLC18A3	2.55959	0.422699	-2.59821	1.4684e-05	5.80967e-05
MPPED2-AS1	0.00654624	0.0369281	2.49598	0.0021028	0.00441927
RNA5SP477	0.612503	0.144953	-2.07914	0.00114061	0.00258092
ATP5MFP5	0.535864	0.0932984	-2.52194	0.00588723	0.0109236
TMEM213	0.172888	15.0287	6.44174	0.00041746	0.00106848
ATP6V0A4	0.254274	20.9228	6.36255	1.13708e-05	4.64613e-05
IGLV7-46	59.2064	6.82337	-3.1172	0.0224362	0.0351915
AL133492.1	0.0449575	0.00909561	-2.30532	2.59652e-09	3.2835e-08
SLC4A1	0.553221	8.21651	3.8926	0.00268151	0.0054674
PAGE2B	1.16349	0.0365946	-4.99069	7.32139e-06	3.1659e-05
AC009264.1	0.0208011	0.00451291	-2.20453	3.27385e-05	0.000116563
PPM1E	0.0986877	0.401601	2.02482	0.000224275	0.000618552
AP005203.1	0.311259	0.0391546	-2.99086	3.19453e-05	0.000114167
AC139491.3	0.0294455	0.00564273	-2.38358	2.32956e-06	1.17022e-05
AC011462.3	0.422714	0.0866781	-2.28594	0.000726986	0.00173665

## Sheet: Supplementary Table 5
Supplementary Table 5. GO analysis of the differential genes.
ONTOLOGY	ID	Description	GeneRatio	BgRatio	pvalue	p.adjust	qvalue	geneID	Count
BP	GO:0055067	monovalent inorganic cation homeostasis	9/94	161/18862	1.10002e-07	0.000139263	0.000132118	SLC12A3/SCNN1G/ATP6V0D2/OTC/SLC9A4/SLC9A2/ATP4B/ATP6V0A4/SLC4A1	9
BP	GO:0006885	regulation of pH	6/94	103/18862	1.26371e-05	0.0079993	0.00758892	ATP6V0D2/SLC9A4/SLC9A2/ATP4B/ATP6V0A4/SLC4A1	6
BP	GO:0030004	cellular monovalent inorganic cation homeostasis	6/94	115/18862	2.37051e-05	0.0100036	0.00949038	ATP6V0D2/SLC9A4/SLC9A2/ATP4B/ATP6V0A4/SLC4A1	6
BP	GO:0051453	regulation of intracellular pH	5/94	88/18862	7.80456e-05	0.0214234	0.0203243	ATP6V0D2/SLC9A4/SLC9A2/ATP6V0A4/SLC4A1	5
BP	GO:0030641	regulation of cellular pH	5/94	95/18862	0.000112307	0.0214234	0.0203243	ATP6V0D2/SLC9A4/SLC9A2/ATP6V0A4/SLC4A1	5
BP	GO:0098659	inorganic cation import across plasma membrane	5/94	97/18862	0.000123943	0.0214234	0.0203243	SLC12A3/SLC9A4/SLC9A2/ATP4B/CNGA3	5
BP	GO:0099587	inorganic ion import across plasma membrane	5/94	97/18862	0.000123943	0.0214234	0.0203243	SLC12A3/SLC9A4/SLC9A2/ATP4B/CNGA3	5
BP	GO:0006833	water transport	3/94	21/18862	0.00014937	0.0214234	0.0203243	AQP2/AQP5/AQP6	3
BP	GO:0098657	import into cell	7/94	230/18862	0.000152299	0.0214234	0.0203243	SLC12A3/CALY/CACNG2/SLC9A4/SLC9A2/ATP4B/CNGA3	7
BP	GO:0006814	sodium ion transport	7/94	239/18862	0.000192834	0.0244127	0.0231603	SLC12A3/SCNN1G/SLC13A2/NKX2-5/SLC9A4/SLC9A2/ATP4B	7
BP	GO:0015698	inorganic anion transport	6/94	171/18862	0.000214182	0.0246504	0.0233858	SLC12A3/ROS1/AQP6/SLC22A8/GABRA3/SLC4A1	6
BP	GO:0055075	potassium ion homeostasis	3/94	29/18862	0.000398693	0.0420621	0.0399042	SLC12A3/SLC9A4/ATP4B	3
BP	GO:0042044	fluid transport	3/94	31/18862	0.000486931	0.0474196	0.0449869	AQP2/AQP5/AQP6	3
CC	GO:0045177	apical part of cell	12/102	414/19520	1.70778e-06	0.000217068	0.000192975	SLC12A3/SCNN1G/ATP6V0D2/AQP2/EPB41L4B/S100G/SLC9A4/AQP5/AQP6/PAPPA2/SLC22A8/ATP6V0A4	12
CC	GO:0016324	apical plasma membrane	11/102	351/19520	2.2494e-06	0.000217068	0.000192975	SLC12A3/SCNN1G/ATP6V0D2/AQP2/S100G/SLC9A4/AQP5/AQP6/PAPPA2/SLC22A8/ATP6V0A4	11
CC	GO:0009925	basal plasma membrane	7/102	240/19520	0.0002667	0.0171577	0.0152534	AQP2/S100G/CLDN8/SLC9A4/AQP5/SLC22A8/SLC4A1	7
CC	GO:0045178	basal part of cell	7/102	258/19520	0.000412529	0.0199045	0.0176953	AQP2/S100G/CLDN8/SLC9A4/AQP5/SLC22A8/SLC4A1	7
CC	GO:0016323	basolateral plasma membrane	6/102	211/19520	0.00084512	0.0326216	0.029001	AQP2/S100G/CLDN8/SLC9A4/SLC22A8/SLC4A1	6
CC	GO:0033179	proton-transporting V-type ATPase, V0 domain	2/102	10/19520	0.00118393	0.038083	0.0338562	ATP6V0D2/ATP6V0A4	2
CC	GO:0030666	endocytic vesicle membrane	5/102	163/19520	0.00165761	0.0457026	0.0406301	ATP6V0D2/CACNG2/SH3GL2/SLC18A3/ATP6V0A4	5
MF	GO:0015250	water channel activity	3/95	12/18337	2.86495e-05	0.0064689	0.00564559	AQP2/AQP5/AQP6	3
MF	GO:0005372	water transmembrane transporter activity	3/95	14/18337	4.70466e-05	0.0064689	0.00564559	AQP2/AQP5/AQP6	3
MF	GO:0008509	anion transmembrane transporter activity	10/95	459/18337	0.00013235	0.0121321	0.010588	SLC12A3/SLC13A2/AQP2/SLC9A4/AQP6/SLC22A8/SLC9A2/GABRA3/SLC18A3/SLC4A1	10
MF	GO:0015078	proton transmembrane transporter activity	5/95	124/18337	0.000464842	0.0319579	0.0278905	ATP6V0D2/SLC9A4/SLC9A2/ATP4B/ATP6V0A4	5
MF	GO:0022853	active ion transmembrane transporter activity	6/95	206/18337	0.000708214	0.0334837	0.0292221	SLC12A3/SLC13A2/SLC9A4/SLC22A8/SLC9A2/SLC4A1	6
MF	GO:0015103	inorganic anion transmembrane transporter activity	5/95	145/18337	0.000944533	0.0334837	0.0292221	SLC12A3/AQP6/SLC22A8/GABRA3/SLC4A1	5
MF	GO:0048306	calcium-dependent protein binding	4/95	84/18337	0.000950258	0.0334837	0.0292221	CRNN/S100G/STMN2/TNNT3	4
MF	GO:0015081	sodium ion transmembrane transporter activity	5/95	146/18337	0.00097407	0.0334837	0.0292221	SLC12A3/SCNN1G/SLC13A2/SLC9A4/SLC9A2	5
MF	GO:0015386	potassium:proton antiporter activity	2/95	11/18337	0.00141697	0.0365935	0.0319362	SLC9A4/SLC9A2	2
MF	GO:0015291	secondary active transmembrane transporter activity	6/95	239/18337	0.00152285	0.0365935	0.0319362	SLC12A3/SLC13A2/SLC9A4/SLC22A8/SLC9A2/SLC4A1	6
MF	GO:0019829	ATPase-coupled cation transmembrane transporter activity	3/95	44/18337	0.00152963	0.0365935	0.0319362	ATP6V0D2/ATP4B/ATP6V0A4	3
MF	GO:0015385	sodium:proton antiporter activity	2/95	12/18337	0.00169464	0.0365935	0.0319362	SLC9A4/SLC9A2	2
MF	GO:0042625	ATPase-coupled ion transmembrane transporter activity	3/95	46/18337	0.00174017	0.0365935	0.0319362	ATP6V0D2/ATP4B/ATP6V0A4	3
MF	GO:0005451	monovalent cation:proton antiporter activity	2/95	13/18337	0.00199601	0.0365935	0.0319362	SLC9A4/SLC9A2	2
MF	GO:0005452	inorganic anion exchanger activity	2/95	13/18337	0.00199601	0.0365935	0.0319362	SLC22A8/SLC4A1	2
MF	GO:0051139	metal ion:proton antiporter activity	2/95	14/18337	0.00232084	0.0398894	0.0348126	SLC9A4/SLC9A2	2
MF	GO:0005523	tropomyosin binding	2/95	16/18337	0.00303988	0.0463785	0.0404758	TNNT1/TNNT3	2
MF	GO:0022821	potassium ion antiporter activity	2/95	16/18337	0.00303988	0.0463785	0.0404758	SLC9A4/SLC9A2	2
MF	GO:0015267	channel activity	8/95	477/18337	0.00333047	0.0463785	0.0404758	SCNN1G/GJD4/AQP2/CACNG2/AQP5/AQP6/GABRA3/CNGA3	8
MF	GO:0022803	passive transmembrane transporter activity	8/95	478/18337	0.00337298	0.0463785	0.0404758	SCNN1G/GJD4/AQP2/CACNG2/AQP5/AQP6/GABRA3/CNGA3	8

## Sheet: Supplementary Table 7
Supplementary Table 7. GSEA analysis of Gene ontology enrichment items of FDX1.
ID	Description	setSize	enrichmentScore	NES	pvalue	p.adjust	qvalues	rank	leading_edge	core_enrichment
GOBP_ALPHA_AMINO_ACID_METABOLIC_PROCESS	GOBP_ALPHA_AMINO_ACID_METABOLIC_PROCESS	190	0.557445	2.30734	1e-10	2.06486e-08	1.72842e-08	11377	tags=54%, list=20%, signal=44%	TAT/BAAT/OTC/AGXT/TYR/ARG1/PAH/CPS1/IYD/GNMT/SLC25A21/HAL/DAO/ACAT1/ALDH8A1/CRYM/GOT1/TH/SEPHS2/AGXT2/DPEP1/ALDH5A1/NOS2/ARG2/GLYATL1/TST/ACMSD/ACADSB/ALDH4A1/DLD/AMDHD1/DDAH1/QDPR/MMUT/AGMAT/MSRA/ASRGL1/GOT2/PRODH/DDO/GPT2/SLC39A8/HGD/GLYAT/SLC7A7/ODC1/PHGDH/CDO1/PSPHP1/GLUD1/GSTZ1/APIP/RIDA/AASDHPPT/OGDH/PCBD1/HOGA1/ILVBL/OAT/GLUD2/GCLC/SDSL/BHMT/CTPS1/PRODH2/GLDC/GFPT1/DLST/MTHFS/ENOPH1/GPT/SL…
GOBP_CELLULAR_KETONE_METABOLIC_PROCESS	GOBP_CELLULAR_KETONE_METABOLIC_PROCESS	252	0.46654	1.99003	1e-10	2.06486e-08	1.72842e-08	8584	tags=27%, list=15%, signal=23%	APOA5/ADH4/APOC3/CYP17A1/APOA1/PLA2G3/CYP7A1/AKR1C4/OXCT1/FABP1/HSD17B6/ABCB11/CYP11A1/MIR33A/CES1/CYP2B6/PPARGC1A/SLC22A13/AVPR1A/ALDH8A1/AKR1C1/CYP4F2/DGAT2/FGF19/PLIN5/GPD1/RGN/ACMSD/SOX9/GOT2/PDP1/PRKCE/SLC7A7/CEACAM1/FSHB/COQ3/ODC1/COQ9/DHRS4/FABP3/SRD5A2/NR4A3/PPARG/INSIG1/PDP2/GSTZ1/CPT1A/PDSS2/PRKAA2/COQ10B/ACADL/COQ2/GLO1/BHMT/CBR4/AKR1B1/PRKAG2/NDUFA9/RDH10/BMP2/PPTC7/SIRT5/KDSR/PDSS1/P…
GOBP_CELLULAR_MONOVALENT_INORGANIC_CATION_HOMEOSTASIS	GOBP_CELLULAR_MONOVALENT_INORGANIC_CATION_HOMEOSTASIS	114	0.669692	2.53996	1e-10	2.06486e-08	1.72842e-08	5380	tags=27%, list=9%, signal=25%	ATP6V1G3/ATP6V0A4/ATP6V0D2/CFTR/SLC4A1/SLC4A9/SLC9A4/ATP6V1B1/ATP6V1C2/SLC9A2/UMOD/ATP4B/ATP12A/TTPA/SLC26A3/AVPR1A/CA2/ATP6V1A/TFAP2B/ATP4A/NEDD4L/SLC4A5/ATP6V1D/ATP1A1/ATP6AP2/KCNMA1/SLC4A4/ATP5F1B/ATP6V0B/ATP6V1H/SLC4A10
GOBP_CELLULAR_RESPIRATION	GOBP_CELLULAR_RESPIRATION	186	0.568989	2.37768	1e-10	2.06486e-08	1.72842e-08	13361	tags=68%, list=23%, signal=52%	CYP1A2/NDUFC2-KCTD14/OGDHL/PPARGC1A/NNT/MTCO2P12/CYCS/UQCRFS1/PRDM16/SDHD/NDUFA4/CAT/IDH3A/SUCLG1/COX7B/UQCRFS1P1/NOS2/SLC25A25/NDUFS1/GPD1/COX5A/DLD/GHITM/SUCLA2/ACO2/UQCRC1/NDUFB6/NDUFB5/FH/FAHD1/NDUFC2/ETFDH/DLAT/MDH1/UQCRQ/UQCRC2/ETFA/NDUFAB1/PDHA1/COQ9/ACO1/COX8A/NR4A3/NDUFB2/NDUFA6/NDUFB1/NDUFA5/SUCLG2/SDHC/COQ10B/FXN/PDHB/OGDH/CISD1/ETFRF1/MTFR1/COX7A2L/NDUFB3/COX7C/CYC1/SDHB/IDH2/NDUFB9/U…
GOBP_LIPID_MODIFICATION	GOBP_LIPID_MODIFICATION	269	0.509815	2.23719	1e-10	2.06486e-08	1.72842e-08	10058	tags=43%, list=18%, signal=35%	APOA5/ADH4/INPP5J/APOA1/APOA2/PIK3C2G/PLPPR1/CYP1A1/HAO1/FA2H/CYP3A4/FABP1/ABCB11/DGKI/CYP4A22/PPARGC1A/HAO2/B4GALNT2/ACAT1/CERKL/P3R3URF/SLC27A2/ST3GAL4/PHYH/PIP5K1B/CYP3A7/DGAT2/IMPA2/AUH/ACADM/CISH/PLIN5/SGPP1/EHHADH/ACAA2/PLPP4/SACM1L/SOX9/PEX7/ABCD3/HADH/ETFDH/AGTR1/ACOX2/ETFA/MIR27B/PECR/FABP3/NR4A3/PPARG/HADHB/ECI2/PIP4P2/CPT1A/AMACR/HSD17B4/ACADL/CPT2/PLPP3/BDH2/SOCS4/IP6K3/ILVBL/SOCS2/IV…
GOBP_MITOCHONDRIAL_GENE_EXPRESSION	GOBP_MITOCHONDRIAL_GENE_EXPRESSION	165	0.556558	2.21858	1e-10	2.06486e-08	1.72842e-08	15143	tags=67%, list=27%, signal=49%	MRPL53/SLC25A33/LARS2/MRPL34/GFM1/FASTKD5/MRPS28/MRPL50/MRPS35/CHCHD10/TRMT10C/TFAM/MRPS36/MRPL44/COA3/MRPL19/MRPL15/GFM2/TACO1/MRPL49/MRPL35/MRPS30/MRPL13/MRPS16/MRPS22/LRPPRC/EARS2/MRPL3/TRMT61B/MRPL1/MRPS18A/MRPL47/MRPL54/TFB2M/C1QBP/FASTKD2/MRPS18B/QRSL1/MRPL48/MRPS9/TRNT1/MRPS10/DARS2/TRUB2/MTRES1/MRPL30/MRPS33/MPV17L2/GATB/PRORP/PNPT1/MRPL42/MRPL45/MRPL41/MRPL39/MALSU1/CHCHD1/UQCC2/NGRN/MRP…
GOBP_MITOCHONDRIAL_TRANSPORT	GOBP_MITOCHONDRIAL_TRANSPORT	270	0.471158	2.07468	1e-10	2.06486e-08	1.72842e-08	13949	tags=57%, list=25%, signal=43%	THRSP/SLC25A21/SLC25A5/MPC1/MGARP/SLC25A4/ATP5F1A/SLC25A33/AIFM1/ACAA2/SFXN2/TST/TMEM14EP/ATP5MC3/ATP5MG/ATP5F1B/FZD5/SLC25A15/MAIP1/TIMM10B/MICU2/MIR29A/SLC39A8/MIPEP/SLC35F6/ATP5ME/HSP90AA1/CHCHD10/PPIF/AFG3L2/HSPA4/CPT1A/SMDT1/PRKAA2/MUL1/CPT2/ATP5PF/ATP5PB/TIMM17A/HSPD1/DMAC2L/MPC2/PMAIP1/TIMM8B/PRKAG2/BOK/MICU1/TMEM14A/SLC25A13/ATPSCKMT/SLC25A20/TIMM10/PINK1/FZD9/VDAC1/MRS2/SFN/ATP5MC1/ATP5P…
GOBP_MONOCARBOXYLIC_ACID_BIOSYNTHETIC_PROCESS	GOBP_MONOCARBOXYLIC_ACID_BIOSYNTHETIC_PROCESS	224	0.54705	2.28577	1e-10	2.06486e-08	1.72842e-08	8584	tags=36%, list=15%, signal=31%	PLA2G4F/APOA5/APOC3/BAAT/APOA1/CYP1A2/PLA2G3/CYP7A1/AGXT/AKR1C4/CYP1A1/FA2H/CYP3A4/ABCB11/AKR1D1/MIR33A/CES1/AVPR1A/PKLR/ALDH8A1/LIPH/ELOVL4/ALDH1A2/TECRL/SLC27A2/CYP39A1/FGF19/SCD5/HACD3/HPGD/ABHD3/SLC27A5/ABHD2/PTGDS/RGN/PNPLA8/ACSBG1/ACSM2B/ACMSD/ACOT4/ELOVL7/FADS6/ABCD3/GATM/HSD17B12/HSD17B8/ACOX2/CBR1/CEACAM1/FADS2B/NDUFAB1/PECR/INSIG1/ACSL3/OLAH/AMACR/HSD17B4/PRKAA2/ACADL/PLP1/HOGA1/EPHX2/C…
GOBP_MONOVALENT_INORGANIC_CATION_HOMEOSTASIS	GOBP_MONOVALENT_INORGANIC_CATION_HOMEOSTASIS	160	0.629618	2.46877	1e-10	2.06486e-08	1.72842e-08	5776	tags=28%, list=10%, signal=25%	ATP6V1G3/RHCG/ATP6V0A4/ATP6V0D2/CFTR/SLC4A1/SLC4A9/SLC9A4/ATP6V1B1/OTC/ATP6V1C2/SLC9A2/UMOD/SLC12A3/ATP4B/SLC12A1/ATP12A/TTPA/SCNN1A/SLC26A3/SLC26A4/CYP4A11/AVPR1A/CA2/ATP6V1A/TAC1/TFAP2B/ATP4A/NEDD4L/CYP4F2/SLC4A5/ATP6V1D/ATP1A1/SPX/KCNJ10/ATP6AP2/KCNMA1/SLC4A4/ATP5F1B/ATP6V0B/ATP6V1H/SLC4A10/AGTR1/EDNRB
GOBP_ORGANIC_ACID_CATABOLIC_PROCESS	GOBP_ORGANIC_ACID_CATABOLIC_PROCESS	257	0.573981	2.46475	1e-10	2.06486e-08	1.72842e-08	9529	tags=56%, list=17%, signal=47%	TAT/SULT2A1/PON1/OTC/AGXT/CEL/ARG1/PAH/HAO1/FABP1/ABCB11/AKR1D1/HAO2/SLC25A21/LDHD/CYP4A11/HAL/DAO/ACAT1/ALDH8A1/CRYM/GOT1/CYP4F2/SLC27A2/ABAT/PHYH/AGXT2/PCCA/PCCB/BCKDHB/AUH/SORD/PCK1/ACADM/PON3/ALDH6A1/ABHD3/HIBCH/ALDH5A1/NOS2/ALDH1L1/PLIN5/QPRT/ARG2/ABHD2/EHHADH/ACAA2/TST/ACMSD/ACOT4/ACADSB/ALDH4A1/DLD/AMDHD1/DDAH1/QDPR/MMUT/ASRGL1/PEX7/ABCD3/GOT2/PRODH/PCK2/CRYL1/DDO/GPT2/HADH/HGD/ETFDH/ADTRP…
GOBP_ORGANIC_HYDROXY_COMPOUND_BIOSYNTHETIC_PROCESS	GOBP_ORGANIC_HYDROXY_COMPOUND_BIOSYNTHETIC_PROCESS	251	0.472782	2.01229	1e-10	2.06486e-08	1.72842e-08	8999	tags=33%, list=16%, signal=28%	APOA5/CFTR/BAAT/APOA1/CYP7A1/PMEL/TYR/AKR1C4/PAH/HMGCS2/INSM1/CYP3A4/PLCG2/TYRP1/LHCGR/ABCB11/AKR1D1/MIR33A/CES1/PNMT/DAO/SC5D/SLC45A2/DDC/GOT1/TH/PTH1R/SLC27A2/CYP39A1/DDT/FGF19/IMPA2/ASAH1/PCK1/SLC27A5/TM7SF2/ACAA2/HAND2/QDPR/IDI1/PCK2/ACOX2/SPTLC3/GPR37/FGF1/DHCR7/CYP51A1/SRD5A2/INSIG1/MSMO1/AMACR/HSD17B4/PRKAA2/HMGCS1/PCBD1/IP6K3/IPPK/HMGCR/CYP7B1/AVPR1B/SCP2/PTS/AKR1B1/LEP/AGTR2/PRKAG2/BMP2/…
GOBP_ORGANIC_HYDROXY_COMPOUND_TRANSPORT	GOBP_ORGANIC_HYDROXY_COMPOUND_TRANSPORT	267	0.460687	1.99443	1e-10	2.06486e-08	1.72842e-08	8781	tags=31%, list=15%, signal=26%	NR0B2/APOA5/APOC3/CFTR/CRH/APOA1/APOA2/SYT10/PON1/SLCO1B1/CYP7A1/SLC6A2/MIR130B/AQP2/CEL/AKR1C4/SLC10A1/SLC18A2/SLC16A7/EGF/ABCB11/RBP4/MIR33A/CES1/SLC6A4/SYT9/SLC51B/PCSK9/SYT17/TAC1/SLC5A1/CHRNA4/SLC5A8/AKR1C1/SLC10A2/SYT8/TTC39B/ABCA8/APOM/GALR1/GRAMD1C/SLC27A5/REN/ABCG8/KCNA2/ENPP7/SYT3/SYT7/LDLR/SLC22A2/SLC10A5/AGTR1/CEACAM1/SLC5A12/MIR27B/SLC2A13/SLC51A/AQP1/SLC22A24/GAL/LIMA1/AQP7/SLCO1A2/…
GOBP_PEROXISOMAL_TRANSPORT	GOBP_PEROXISOMAL_TRANSPORT	72	0.705981	2.58544	1e-10	2.06486e-08	1.72842e-08	12083	tags=65%, list=21%, signal=51%	BAAT/AGXT/HAO1/HAO2/DAO/SLC27A2/PHYH/CAT/NOS2/EHHADH/ACOT4/PEX7/ABCD3/PEX3/DDO/ACOX2/DHRS4/PECR/ACOT2/ECI2/AMACR/HSD17B4/ZFAND6/EPHX2/ACOX1/HACL1/SCP2/CRAT/AGPS/UBE2D1/NUDT7/CROT/UBE2D3/UBB/MLYCD/PEX2/PEX12/USP9X/ACAA1/PEX13/PEX19/IDE/LONP2/PAOX/PEX1/HMGCL/PEX26
GOBP_PEROXISOME_ORGANIZATION	GOBP_PEROXISOME_ORGANIZATION	84	0.67208	2.41304	1e-10	2.06486e-08	1.72842e-08	12205	tags=63%, list=21%, signal=50%	BAAT/AGXT/HAO1/HAO2/DAO/SLC27A2/PHYH/CAT/NOS2/EHHADH/ACOT4/PEX7/ABCD3/PEX3/DDO/ACOX2/DHRS4/PECR/ACOT2/ECI2/AMACR/HSD17B4/ZFAND6/EPHX2/ACOX1/TMEM135/HACL1/SCP2/CRAT/AGPS/UBE2D1/NUDT7/CROT/UBE2D3/UBB/MLYCD/PEX2/FIS1/PEX12/PEX11G/USP9X/ACAA1/PEX13/PEX19/IDE/MFF/LONP2/PAOX/PEX11B/PEX1/HMGCL/PEX26/DNM1L
GOBP_REGULATION_OF_PH	GOBP_REGULATION_OF_PH	102	0.685985	2.56997	1e-10	2.06486e-08	1.72842e-08	5380	tags=25%, list=9%, signal=23%	ATP6V1G3/RHCG/ATP6V0A4/ATP6V0D2/CFTR/SLC4A1/SLC4A9/SLC9A4/ATP6V1B1/ATP6V1C2/SLC9A2/ATP4B/TTPA/SLC26A3/SLC26A4/AVPR1A/CA2/ATP6V1A/SLC4A5/ATP6V1D/ATP6AP2/SLC4A4/ATP5F1B/ATP6V0B/ATP6V1H/SLC4A10
GOBP_SENSORY_PERCEPTION_OF_SMELL	GOBP_SENSORY_PERCEPTION_OF_SMELL	445	-0.534227	-1.63361	1e-10	2.06486e-08	1.72842e-08	14894	tags=50%, list=26%, signal=37%	OR1E1/OR51Q1/OR52N2/OR2M4/OR9A1P/OR52B2/OR8D4/OR5AN1/OR4D6/OR9Q1/OR4A16/OR2T27/OR52Z1/OBP2B/OR7A5/OR3A1/OR5B21/OR2A4/OR52A4P/OR5H14/OR13J1/OR13C7/OR4K13/NCAM2/OR51J1/OR4K1/OR5AU1/OR13C9/OR13C6P/OR5P3/OR5D16/OR8B4/OR6K6/OR3A2/OR9G1/OR7A10/OR1F12/OR2A25/OR11H4/OR8D1/GPR148/OR9K2/OR5B17/OR2J3/OR6X1/OR9G4/OR5B12/OR4F5/OR6J1/OR2M7/OR52E4/OR7D2/OR2K2/OR2H2/OR5AK2/OR12D1/OR52N5/OR1F2P/OR2V1/OR4K15/OR52K…
GOBP_SODIUM_ION_TRANSPORT	GOBP_SODIUM_ION_TRANSPORT	239	0.460023	1.92211	1e-10	2.06486e-08	1.72842e-08	8209	tags=33%, list=14%, signal=28%	SLC38A8/FXYD4/SLC4A9/SLC9A4/SLC13A2/SLC24A2/ATP6V1B1/SLC38A3/SLC6A2/SLC9A2/UMOD/SLC6A15/SLC12A3/HCN2/ATP4B/SLC34A1/SLC10A1/SLC12A1/ATP12A/SCNN1A/SLC38A4/SLC6A18/ABCB11/SCN2B/SLC6A4/SLC5A2/PCSK9/GPD1L/KLHL3/SLC5A1/SLC13A1/SLC5A8/SLC6A19/WNK3/ATP4A/NEDD4L/SLC10A2/PTPN3/SLC6A20/ANK3/PRSS8/SCN2A/SLC4A5/ATP1A1/SLC4A11/SLC6A13/SLC5A10/SLC34A3/SLC17A2/SLC4A4/SLC17A7/HECW1/SLC10A5/SLC4A10/PRKCE/SLC5A12/H…
GOBP_STEROID_BIOSYNTHETIC_PROCESS	GOBP_STEROID_BIOSYNTHETIC_PROCESS	190	0.523323	2.1661	1e-10	2.06486e-08	1.72842e-08	8865	tags=34%, list=16%, signal=29%	APOA5/CFTR/CYP17A1/BAAT/APOA1/CGA/CYP7A1/AKR1C4/CYP1A1/PRLR/HMGCS2/CYP3A4/HSD17B6/HSD11B2/ABCB11/AKR1D1/CYP11A1/MIR33A/CES1/PPARGC1A/SC5D/FDX1/SLC27A2/CYP39A1/CYP3A7/FGF19/ASAH1/ATP1A1/SLC27A5/TM7SF2/ACAA2/PBX1/IDI1/HSD17B12/HSD17B8/ACOX2/FSHB/FGF1/DHCR7/CYP51A1/SRD5A2/INSIG1/MSMO1/SDR42E1/AMACR/HSD17B4/PRKAA2/HMGCS1/DHRS11/HMGCR/CYP7B1/SCP2/AKR1B1/LEP/PRKAG2/BMP2/CYP27A1/OSBP/OSBPL1A/LPCAT3/GPAM…
GOBP_STEROL_METABOLIC_PROCESS	GOBP_STEROL_METABOLIC_PROCESS	165	0.574494	2.29007	1e-10	2.06486e-08	1.72842e-08	8865	tags=34%, list=16%, signal=29%	NR0B2/APOA5/CFTR/APOA1/APOA2/CYP1A2/SULT2A1/APOF/PON1/CYP7A1/CEL/HMGCS2/CYP3A4/AKR1D1/CYP11A1/CES1/PCSK9/SC5D/FDX1/TTC39B/CYP39A1/FMO5/DGAT2/CAT/ANGPTL3/TM7SF2/ACAA2/CUBN/LDLR/IDI1/FGF1/DHCR7/SMPD1/CYP51A1/INSIG1/MSMO1/PRKAA2/LIMA1/ACADL/HMGCS1/EPHX2/HMGCR/CYP7B1/CYP26C1/LEP/PRKAG2/CYP4V2/CYP27A1/OSBPL1A/CLN8/LPCAT3/GPAM/FDFT1/LRP5/PLPP6/FAXDC2
GOCC_BASAL_PART_OF_CELL	GOCC_BASAL_PART_OF_CELL	258	0.583792	2.51009	1e-10	2.06486e-08	1.72842e-08	7202	tags=31%, list=13%, signal=27%	RHCG/CLDN8/BSND/RHBG/SLC26A7/SLC4A1/SLC4A9/SLC9A4/AQP5/SLCO1B1/ATP6V1B1/SLC38A3/UMOD/SLC22A8/AQP2/CDH17/SLC10A1/SLC22A9/SLC22A6/MUC20/NDRG4/SLC7A8/CASR/MARVELD2/ERBB4/SLC22A7/SLC51B/CLDN19/TACSTD2/CA2/DLG2/LIN7A/EPCAM/CLDN4/PTH1R/ABCA8/ST14/CDH16/ANK3/SLC29A2/HPGD/ATP1A1/SLC4A11/SLC27A5/SLC6A13/KCNJ10/CLDN7/SLC16A10/MAP7/AJAP1/SLC4A4/DSP/LDLR/SLCO4C1/SLC4A10/SLC39A8/ANK2/PDPN/SLC7A7/CEACAM1/ABCC4…
GOCC_BASOLATERAL_PLASMA_MEMBRANE	GOCC_BASOLATERAL_PLASMA_MEMBRANE	211	0.613784	2.50461	1e-10	2.06486e-08	1.72842e-08	7202	tags=33%, list=13%, signal=29%	RHCG/CLDN8/BSND/RHBG/SLC26A7/SLC4A1/SLC4A9/SLC9A4/SLCO1B1/ATP6V1B1/SLC38A3/UMOD/SLC22A8/AQP2/CDH17/SLC10A1/SLC22A9/SLC22A6/NDRG4/SLC7A8/CASR/MARVELD2/ERBB4/SLC22A7/SLC51B/CLDN19/CA2/DLG2/LIN7A/EPCAM/PTH1R/ABCA8/ST14/CDH16/ANK3/SLC29A2/HPGD/ATP1A1/SLC4A11/SLC6A13/KCNJ10/CLDN7/SLC16A10/MAP7/AJAP1/SLC4A4/DSP/LDLR/SLCO4C1/SLC4A10/SLC39A8/ANK2/PDPN/SLC7A7/ABCC4/ENPP1/SYNJ2BP/EZR/SLC13A3/KCNC2/SLC51A/S…
GOCC_INNER_MITOCHONDRIAL_MEMBRANE_PROTEIN_COMPLEX	GOCC_INNER_MITOCHONDRIAL_MEMBRANE_PROTEIN_COMPLEX	141	0.581823	2.28335	1e-10	2.06486e-08	1.72842e-08	13224	tags=70%, list=23%, signal=54%	NDUFC2-KCTD14/UQCRFS1/ATP5F1A/SDHD/NDUFA4/UQCRFS1P1/NDUFS1/COX5A/APOO/ATP5MC3/ATP5MG/ATP5F1B/UQCRC1/NDUFB6/NDUFB5/TIMM10B/NDUFC2/MICU2/UQCRQ/ATP5ME/UQCRC2/CHCHD10/NDUFAB1/PPIF/NDUFB2/NDUFA6/DMAC1/AFG3L2/NDUFB1/NDUFA5/APOOL/HSPA9/SMDT1/SDHC/ATP5PF/ATP5PB/TIMM17A/NDUFB3/COX7C/ATP5MPL/CYC1/SDHB/NDUFB9/UQCR10/NDUFA9/MICU1/IMMT/COX6A1/SDHAF4/TIMM10/NDUFA8/ATP5MC1/ATP5PO/ATP5MD/DNAJC19/COX4I1/PHB/NDUFS…
GOCC_MICROBODY	GOCC_MICROBODY	136	0.617755	2.40424	1e-10	2.06486e-08	1.72842e-08	12257	tags=63%, list=22%, signal=50%	BAAT/AGXT/HAO1/FABP1/URAD/HAO2/DAO/CRYM/TMEM35A/SLC27A2/PHYH/ACSL1/ACSL6/CAT/FNDC5/NUDT12/NOS2/HSDL2/EHHADH/ISOC1/PNPLA8/ACOT4/PEX7/SYT7/ABCD3/PEX3/IDI1/DDO/ACOX2/VWA8/DHRS4/PECR/AOC1/ACOT2/ECI2/ACSL3/AMACR/HSD17B4/RIDA/MUL1/EPHX2/MTARC2/GRHPR/ACOX1/HMGCR/ACAD11/TMEM135/HACL1/ATAD1/IDH2/SCP2/CRAT/AGPS/PXMP2/NUDT7/CROT/ACSL4/MPV17L/MLYCD/PEX2/PRDX5/FIS1/ACBD5/ALDH3A2/TTC1/PEX12/PEX11G/ACAA1/PEX13/…
GOCC_MITOCHONDRIAL_PROTEIN_CONTAINING_COMPLEX	GOCC_MITOCHONDRIAL_PROTEIN_CONTAINING_COMPLEX	263	0.582034	2.50291	1e-10	2.06486e-08	1.72842e-08	13912	tags=71%, list=24%, signal=54%	NDUFC2-KCTD14/MRPL53/UQCRFS1/ATP5F1A/SDHD/NDUFA4/BCKDHB/UQCRFS1P1/NDUFS1/COX5A/APOO/ATP5MC3/ATP5MG/ATP5F1B/MRPL34/UQCRC1/NDUFB6/NDUFB5/TIMM10B/NDUFC2/MICU2/MRPS28/MRPL50/DLAT/UQCRQ/MRPS35/ATP5ME/UQCRC2/CHCHD10/NDUFAB1/PDHA1/PPIF/TRMT10C/NDUFB2/NDUFA6/DMAC1/AFG3L2/NDUFB1/NDUFA5/APOOL/HSPA9/SUCLG2/MRPS36/SMDT1/SDHC/PDHB/ATP5PF/ATP5PB/MRPL44/TIMM17A/MRPL19/MRPL15/MRPL49/NDUFB3/COX7C/ATP5MPL/MRPL35/M…
GOMF_ACTIVE_ION_TRANSMEMBRANE_TRANSPORTER_ACTIVITY	GOMF_ACTIVE_ION_TRANSMEMBRANE_TRANSPORTER_ACTIVITY	205	0.548718	2.25246	1e-10	2.06486e-08	1.72842e-08	7129	tags=35%, list=13%, signal=31%	SLC26A7/SLC4A1/SLC4A9/SLC9A4/SLC13A2/SLC24A2/SLCO1B1/SLC6A2/SLC9A2/SLC6A15/SLC36A2/SLC22A8/SLC12A3/CDH17/SLC34A1/SLC10A1/SLC18A2/SLC22A9/SLC12A1/ATP12A/SLC16A7/SLC26A3/SLC22A6/ABCB11/SLC26A4/SLC6A4/SLC5A2/SLC22A7/SLC1A6/SLC25A5/SLC5A1/SLC13A1/SLC5A8/SLC45A2/ATP4A/SLC22A11/SLC10A2/SLC25A4/SLC6A20/SLC4A5/ATP1A1/SLC4A11/SLC6A13/SLC5A10/SLC15A2/SLC34A3/SLC17A2/SLC4A4/SLC1A1/CLCN5/SLC17A7/SLC22A2/SLC2…
GOMF_OLFACTORY_RECEPTOR_ACTIVITY	GOMF_OLFACTORY_RECEPTOR_ACTIVITY	421	-0.547168	-1.67055	1e-10	2.06486e-08	1.72842e-08	14894	tags=52%, list=26%, signal=39%	OR1E1/OR51Q1/OR52N2/OR2M4/OR9A1P/OR52B2/OR8D4/OR5AN1/OR4D6/OR9Q1/OR4A16/OR2T27/OR52Z1/OR7A5/OR3A1/OR5B21/OR2A4/OR52A4P/OR5H14/OR13J1/OR13C7/OR4K13/OR51J1/OR4K1/OR5AU1/OR13C9/OR13C6P/OR5P3/OR5D16/OR8B4/OR6K6/OR3A2/OR9G1/OR7A10/OR1F12/OR2A25/OR11H4/OR8D1/GPR148/OR9K2/OR5B17/OR2J3/OR6X1/OR9G4/OR5B12/OR4F5/OR6J1/OR2M7/OR52E4/OR7D2/OR2K2/OR2H2/OR5AK2/OR12D1/OR52N5/OR1F2P/OR2V1/OR4K15/OR52K2/OR4D5/OR4K…
GOMF_ORGANIC_ACID_TRANSMEMBRANE_TRANSPORTER_ACTIVITY	GOMF_ORGANIC_ACID_TRANSMEMBRANE_TRANSPORTER_ACTIVITY	156	0.571274	2.22651	1e-10	2.06486e-08	1.72842e-08	7759	tags=41%, list=14%, signal=36%	SLC26A7/SLC38A8/SLC13A2/SLCO1B1/SLC38A3/SLC6A15/SLC36A2/AKR1C4/SLC10A1/SLC22A9/SLC16A7/SLC38A4/SLC6A18/SLC16A11/SLC26A3/ABCB11/SLC26A4/SLC7A8/SLC7A3/SLC25A21/SLC22A13/SLC51B/SLC1A6/SLC5A8/SLC6A19/SLC16A9/SLC19A2/MPC1/SLC10A2/SLC27A2/SLC6A20/SLC7A9/SLC27A5/SLC6A13/SFXN2/SLC16A10/SLC1A1/SLC17A7/SLC22A2/SLC25A15/SLC26A9/SLC10A5/SLC16A6/SLC1A2/SLC7A7/CEACAM1/SLC5A12/SLC13A3/SLC51A/SLC16A12/SLC47A1/SL…
GOMF_OXIDOREDUCTASE_ACTIVITY_ACTING_ON_CH_OH_GROUP_OF_DONORS	GOMF_OXIDOREDUCTASE_ACTIVITY_ACTING_ON_CH_OH_GROUP_OF_DONORS	130	0.609967	2.35411	1e-10	2.06486e-08	1.72842e-08	9392	tags=52%, list=17%, signal=44%	ADH4/ADH1A/ADH1C/DHRS2/AKR1C4/HAO1/HSD17B6/RDH12/HSD11B2/AKR1D1/CYP4A22/HAO2/LDHD/ADH6/RDH16/MIOX/BDH1/AKR1C1/DHDH/AKR7A3/IDH3A/SORD/HPGD/HSD17B13/EHHADH/GPD1/RDH11/ADH1B/CRYL1/HADH/HSD17B12/HSD17B8/MDH1/CBR1/ABCC4/PHGDH/DHRS4/LDHB/DCXR/HIBADH/SRD5A2/HADHB/SDR42E1/CHDH/HSD17B4/RDH14/BDH2/DHRS11/GRHPR/ME1/ADH5/HMGCR/L2HGDH/IDH2/CBR4/AKR1B1/RDH10/BMP2/HADHA/KDSR/LDHC/AKR7A2/SPR/DHRS9/PTGR1/UEVLD/AL…
GOMF_SECONDARY_ACTIVE_TRANSMEMBRANE_TRANSPORTER_ACTIVITY	GOMF_SECONDARY_ACTIVE_TRANSMEMBRANE_TRANSPORTER_ACTIVITY	238	0.535011	2.23581	1e-10	2.06486e-08	1.72842e-08	7129	tags=33%, list=13%, signal=29%	SLC26A7/SLC4A1/SLC4A9/SLC9A4/SLC13A2/SLC24A2/SLCO1B1/SLC38A3/SLC6A2/SLC9A2/SLC6A15/SLC36A2/SLC22A8/SLC12A3/CDH17/SLC34A1/SLC10A1/SLC18A2/SLC22A9/SLC12A1/SLC16A7/SLC38A4/SLC6A18/SLC16A11/SLC26A3/SLC22A6/SLC26A4/SLC7A8/SLC6A4/SLC5A2/SLC22A7/SLC1A6/SLC25A5/SLC5A1/SLC13A1/SLC5A8/SLC6A19/SLC45A2/SLC16A9/SLC22A11/SLC10A2/SLC25A4/SLC6A20/SLC4A5/SLC4A11/SLC6A13/SLC16A10/SLC5A10/SLC15A2/SLC34A3/SLC17A2/SL…
GOMF_SYMPORTER_ACTIVITY	GOMF_SYMPORTER_ACTIVITY	143	0.578817	2.29816	1e-10	2.06486e-08	1.72842e-08	7954	tags=41%, list=14%, signal=36%	SLC4A9/SLC13A2/SLC24A2/SLC38A3/SLC6A2/SLC6A15/SLC36A2/SLC12A3/SLC34A1/SLC10A1/SLC18A2/SLC12A1/SLC16A7/SLC38A4/SLC6A18/SLC16A11/SLC6A4/SLC5A2/SLC1A6/SLC5A1/SLC13A1/SLC5A8/SLC6A19/SLC45A2/SLC16A9/SLC10A2/SLC6A20/SLC4A5/SLC4A11/SLC6A13/SLC5A10/SLC15A2/SLC34A3/SLC17A2/SLC4A4/SLC1A1/SLC17A7/SLC10A5/SLC4A10/SLC39A8/SLC16A6/SLC1A2/SLC5A12/SLC12A2/SLC13A3/SLC2A13/SLC16A12/MFSD3/SLC16A13/SLC25A3/SLC6A12/S…
GOBP_CELLULAR_AMINO_ACID_CATABOLIC_PROCESS	GOBP_CELLULAR_AMINO_ACID_CATABOLIC_PROCESS	105	0.605845	2.2799	1.00165e-10	2.06486e-08	1.72842e-08	9529	tags=58%, list=17%, signal=48%	TAT/OTC/AGXT/ARG1/PAH/SLC25A21/HAL/DAO/ALDH8A1/CRYM/GOT1/ABAT/AGXT2/AUH/ALDH6A1/HIBCH/ALDH5A1/NOS2/ARG2/ACMSD/ALDH4A1/DLD/AMDHD1/DDAH1/QDPR/ASRGL1/GOT2/PRODH/DDO/GPT2/HGD/CDO1/HIBADH/GLUD1/GSTZ1/RIDA/OGDH/PCBD1/HOGA1/OAT/IVD/CARNMT1/GLUD2/ACAD8/SDSL/MCCC2/PRODH2/GLDC/DLST/GPT/MCCC1/MAT1A/GLS/ALDH7A1/SHMT1/HNMT/SDS/FTCD/KYNU/GCAT/GCDH
GOMF_ORGANIC_ANION_TRANSMEMBRANE_TRANSPORTER_ACTIVITY	GOMF_ORGANIC_ANION_TRANSMEMBRANE_TRANSPORTER_ACTIVITY	176	0.507004	2.02871	1.00756e-10	2.06486e-08	1.72842e-08	7231	tags=32%, list=13%, signal=28%	SLC26A7/CFTR/SLC4A1/SLC4A9/SLC13A2/SLCO1B1/SLC38A3/SLC36A2/SLC22A9/SLC16A7/SLC16A11/SLC26A3/SLC22A6/SLC26A4/SLC7A8/SLC22A12/SLC7A3/SLC25A21/SLC22A7/SLC22A13/SLC1A6/SLC25A5/SLC2A2/SLC5A8/SLC19A2/MPC1/SLC22A11/SLC25A4/SLC6A20/SLC4A5/SLC44A4/SLC7A9/SLC4A11/SLC25A25/SLC6A13/SFXN2/SLC4A4/SLC1A1/SLC17A7/SLC22A2/SLC25A15/SLC26A9/SLCO4C1/SLC4A10/SLC39A8/SLC1A2/SLC5A12/SLC13A3/SLC16A12/SLC47A1/SLC52A3/SLC…
GOBP_CELLULAR_LIPID_CATABOLIC_PROCESS	GOBP_CELLULAR_LIPID_CATABOLIC_PROCESS	229	0.469049	1.93071	1.49829e-10	2.97752e-08	2.49238e-08	10058	tags=43%, list=18%, signal=36%	PLA2G4F/APOA5/APOC3/APOA1/APOA2/CEL/AADAC/HAO1/PLCG2/CPS1/FABP1/ABCB11/NEU4/HAO2/ACAT1/LIPH/SLC27A2/GBA3/PHYH/PCCA/PCCB/ANGPTL3/AUH/ASAH1/PCK1/ACADM/ABHD3/PLIN5/ABHD2/EHHADH/ACAA2/PNPLA8/ENPP7/MMUT/PEX7/ABCD3/LDLR/PCK2/HADH/ETFDH/PNPLA4/ADTRP/ACOX2/SORL1/ABHD6/ETFA/SMPD1/PECR/FABP3/HADHB/ECI2/SLC27A4/CPT1A/AMACR/HSD17B4/GDE1/ACADL/CPT2/BDH2/ILVBL/IVD/ABHD5/ACOX1/ACAD11/DECR1/HACL1/CYP26C1/PRKCD/E…
GOCC_MICROBODY_LUMEN	GOCC_MICROBODY_LUMEN	51	0.765979	2.57585	1.89006e-10	3.64559e-08	3.0516e-08	11322	tags=76%, list=20%, signal=61%	BAAT/AGXT/HAO1/FABP1/HAO2/DAO/CRYM/PHYH/CAT/NUDT12/NOS2/EHHADH/ACOT4/PEX7/ABCD3/DDO/ACOX2/DHRS4/ACOT2/ECI2/AMACR/HSD17B4/EPHX2/GRHPR/ACOX1/HACL1/SCP2/CRAT/AGPS/NUDT7/CROT/MLYCD/PRDX5/ACAA1/FAR2/IDE/FAR1/LONP2/PAOX
GOBP_PROTON_TRANSMEMBRANE_TRANSPORT	GOBP_PROTON_TRANSMEMBRANE_TRANSPORT	157	0.527164	2.07471	3.54135e-10	6.63548e-08	5.55433e-08	9555	tags=45%, list=17%, signal=38%	ATP6V1G3/ATP6V0A4/ATP6V0D2/SLC9A4/ATP6V1B1/ATP6V1C2/SLC9A2/SLC36A2/ATP12A/ATP6V1A/NOX5/NNT/MTCO2P12/COX7A1/ATP4A/ATP5F1A/NDUFA4/ATP6V1D/ATP1A1/COX7B/SLC4A11/COX5A/SLC15A2/ATP5MC3/ATP5MG/ATP5F1B/ATP6V0B/CLCN5/ATP6V1H/SLC4A10/ATP5ME/TESC/PPIF/COX8A/COX7A2/PM20D1/MFSD3/ATP6V0D1/ATP6V1E1/ATP6V0E2/ATP5PF/ATP5PB/SLC25A3/ATP2C2/TACO1/SLC17A5/COX7A2L/COX7C/CHP1/DMAC2L/CYB5A/CLCN4/ATP6V1G1/COX6A1/ATPSCKMT…
GOBP_THIOESTER_METABOLIC_PROCESS	GOBP_THIOESTER_METABOLIC_PROCESS	105	0.592612	2.2301	3.80472e-10	6.93093e-08	5.80164e-08	12602	tags=63%, list=22%, signal=49%	BAAT/ACOT12/HMGCS2/ACAT1/ELOVL4/ACOT1/ACOT11/ACSL1/DGAT2/SCD5/ACSL6/ACSBG1/ACSM2B/ACOT4/DLD/ELOVL7/SUCLA2/PDP1/GLYAT/HSD17B12/HSD17B8/DLAT/FITM2/PDHA1/ACOT2/ACSL3/PDP2/SUCLG2/GSTZ1/PDHX/HSD17B4/HMGCS1/PDHB/OGDH/MPC2/CBR4/ACSM2A/DLST/HACD2/NUDT7/ACSL4/ACSS1/GPAM/MLYCD/PDK2/KYNU/PDK4/GCDH/OXSM/AADAT/FAR2/PPCS/ACSM3/ACSM5/DBI/ACOT13/ACLY/THEM5/ACSF2/FAR1/ACOT7/HMGCL/THEM4/GPAT4/ACSS2/ELOVL6
GOBP_MITOCHONDRIAL_TRANSLATION	GOBP_MITOCHONDRIAL_TRANSLATION	134	0.555822	2.17735	4.25768e-10	7.54644e-08	6.31687e-08	16485	tags=74%, list=29%, signal=53%	MRPL53/LARS2/MRPL34/GFM1/MRPS28/MRPL50/MRPS35/TRMT10C/MRPS36/MRPL44/COA3/MRPL19/MRPL15/GFM2/TACO1/MRPL49/MRPL35/MRPS30/MRPL13/MRPS16/MRPS22/LRPPRC/EARS2/MRPL3/MRPL1/MRPS18A/MRPL47/MRPL54/C1QBP/FASTKD2/MRPS18B/QRSL1/MRPL48/MRPS9/MRPS10/DARS2/TRUB2/MRPL30/MRPS33/MPV17L2/GATB/MRPL42/MRPL45/MRPL41/MRPL39/MALSU1/CHCHD1/UQCC2/NGRN/MRPL4/MRPL16/MRPL32/TUFM/MRPL21/MRPS23/MRPS14/MRPS31/MRPS7/MRPL22/MRPL14…
GOMF_PROTON_TRANSMEMBRANE_TRANSPORTER_ACTIVITY	GOMF_PROTON_TRANSMEMBRANE_TRANSPORTER_ACTIVITY	124	0.572891	2.20623	5.63007e-10	9.71632e-08	8.13319e-08	9033	tags=48%, list=16%, signal=40%	ATP6V1G3/ATP6V0A4/ATP6V0D2/SLC9A4/ATP6V1B1/ATP6V1C2/SLC9A2/SLC36A2/ATP4B/ATP12A/ATP6V1A/NOX5/NNT/SLC45A2/MTCO2P12/COX7A1/ATP4A/ATP5F1A/NDUFA4/ATP6V1D/COX7B/SLC4A11/COX5A/SLC15A2/ATP5MG/ATP5F1B/ATP6V0B/CLCN5/ATP6V1H/SLC39A8/ATP5ME/COX8A/SLC2A13/COX7A2/MFSD3/ATP6V0D1/ATP6V1E1/ATP6V0E2/ATP5PF/ATP5PB/SLC25A3/ATP2C2/SLC17A5/COX7A2L/COX7C/DMAC2L/CYB5A/CLCN4/ATP6V1G1/COX6A1/ATP5PO/ATP6V1C1/SURF1/COX4I1/…
GOBP_HORMONE_METABOLIC_PROCESS	GOBP_HORMONE_METABOLIC_PROCESS	217	0.46222	1.90598	6.51035e-10	1.09474e-07	9.1637e-08	8224	tags=34%, list=14%, signal=29%	ADH4/ADH1A/CYP17A1/ADH1C/UGT2B15/CYP1A2/SULT2A1/UGT2B4/CGA/DHRS2/TTR/DIO1/AKR1C4/CYP1A1/CYP3A4/CTSK/HSD17B6/RDH12/IYD/RBP4/AKR1D1/CYP11A1/KLK6/DUOX2/CES1/PPARGC1A/ADH6/DUOXA2/RDH16/ALDH8A1/ALDH1A2/AKR1C1/CRYM/GHR/FDX1/ACE2/CYP3A7/DGAT2/DUOXA1/ATP1A1/UGT1A9/ATP6AP2/RDH11/REN/SLC16A10/ADH1B/CMA1/DDO/PNPLA4/HSD17B12/HSD17B8/FSHB/UGT1A7/DHCR7/SRD5A2/GAL/HSD17B4/RDH14/CYP2C18/DHRS11/SULT1B1/SCPEP1/ALD…
GOBP_ORGANIC_ACID_TRANSMEMBRANE_TRANSPORT	GOBP_ORGANIC_ACID_TRANSMEMBRANE_TRANSPORT	153	0.525462	2.06555	7.04578e-10	1.15516e-07	9.66941e-08	8692	tags=39%, list=15%, signal=33%	SLC38A8/SLC13A2/THRSP/SLC38A3/SLC6A15/SLC36A2/SLC16A7/SLC38A4/SLC6A18/SLC16A11/SLC7A8/SLC7A3/SLC25A21/SLC1A6/GRM1/SLC5A8/SLC6A19/MPC1/ACE2/CLTRN/SLC6A20/ACSL1/LRP2/SLC7A9/SLC27A5/SLC6A13/SFXN2/KCNJ10/SLC16A10/SLC1A1/SLC17A7/ABCD3/SLC22A2/SLC25A15/SLC1A2/PDPN/SLC7A7/SLC5A12/SLC13A3/CPT1A/SLC47A1/PRKAA2/CPT2/SLC6A12/SLC7A13/SLC22A4/SLC3A2/MPC2/SLC13A5/PRKAG2/SLC25A13/SLC43A1/FOLR1/SLC25A20/SLC25A11…
GOBP_FATTY_ACID_BIOSYNTHETIC_PROCESS	GOBP_FATTY_ACID_BIOSYNTHETIC_PROCESS	168	0.511152	2.06615	8.49806e-10	1.35928e-07	1.1378e-07	8584	tags=33%, list=15%, signal=28%	PLA2G4F/APOA5/APOC3/APOA1/CYP1A2/PLA2G3/CYP7A1/CYP1A1/FA2H/CYP3A4/MIR33A/AVPR1A/LIPH/ELOVL4/TECRL/SCD5/HACD3/HPGD/ABHD3/ABHD2/PTGDS/RGN/PNPLA8/ACSBG1/ACSM2B/ACOT4/ELOVL7/FADS6/ABCD3/HSD17B12/HSD17B8/CBR1/CEACAM1/FADS2B/NDUFAB1/PECR/INSIG1/ACSL3/OLAH/PRKAA2/ACADL/PLP1/EPHX2/PRKAB1/PTGES2/CBR4/PRKAG2/ACSM2A/LIPC/HACD2/PLA2G4A/ALOXE3/CYP2E1/ACSS1/MLYCD
GOBP_ELECTRON_TRANSPORT_CHAIN	GOBP_ELECTRON_TRANSPORT_CHAIN	178	0.50241	2.04243	8.83926e-10	1.38019e-07	1.15531e-07	13217	tags=63%, list=23%, signal=49%	CYP1A2/AKR1C4/NDUFC2-KCTD14/HSD17B6/PPARGC1A/MTCO2P12/RDH16/CYCS/COX7A1/DHDH/UQCRFS1/FDX1/SDHD/NDUFA4/AKR7A3/COX7B/UQCRFS1P1/NDUFS1/GPD1/COX5A/ALDH4A1/DLD/QDPR/GHITM/UQCRC1/NDUFB6/NDUFB5/NDUFC2/ETFDH/UQCRQ/UQCRC2/ETFA/NDUFAB1/PHGDH/COQ9/COX8A/NDUFB2/NDUFA6/NDUFB1/COX7A2/NDUFA5/SDHC/ETFRF1/COX7A2L/NDUFB3/COX7C/ME1/ADH5/CYB5A/CYC1/SDHB/NDUFB9/UQCR10/AKR1B1/AFG1L/NDUFA9/GLDC/SLC25A13/COX6A1/CIAPIN1/…
GOBP_RESPIRATORY_ELECTRON_TRANSPORT_CHAIN	GOBP_RESPIRATORY_ELECTRON_TRANSPORT_CHAIN	117	0.56535	2.15835	1.03795e-09	1.583e-07	1.32507e-07	13217	tags=70%, list=23%, signal=54%	NDUFC2-KCTD14/PPARGC1A/MTCO2P12/CYCS/UQCRFS1/SDHD/NDUFA4/COX7B/UQCRFS1P1/NDUFS1/GPD1/COX5A/DLD/GHITM/UQCRC1/NDUFB6/NDUFB5/NDUFC2/ETFDH/UQCRQ/UQCRC2/ETFA/NDUFAB1/COQ9/COX8A/NDUFB2/NDUFA6/NDUFB1/NDUFA5/SDHC/ETFRF1/COX7A2L/NDUFB3/COX7C/CYC1/SDHB/NDUFB9/UQCR10/AFG1L/NDUFA9/SLC25A13/COX6A1/ISCU/PINK1/NDUFA8/COX4I1/NDUFS4/SLC25A12/NDUFS3/NDUFAF1/NDUFS6/GPD2/NDUFC1/NDUFA10/SLC25A18/COX6C/NDUFV1/COX5B/CH…
GOBP_CELLULAR_MODIFIED_AMINO_ACID_METABOLIC_PROCESS	GOBP_CELLULAR_MODIFIED_AMINO_ACID_METABOLIC_PROCESS	196	0.477837	1.98387	1.08706e-09	1.60603e-07	1.34436e-07	9294	tags=41%, list=16%, signal=35%	PLA2G4F/SULT2A1/CGA/PLA2G3/GSTA3/GGT6/DIO1/CKMT1B/CKMT1A/EEF1G/CKMT2/CTSK/IYD/GNMT/DUOX2/VNN1/DUOXA2/CLIC5/CRYM/NAT8/BBOX1/DPEP1/ACADM/DUOXA1/ALDH1L1/SLC16A10/GSTA1/ALDH4A1/SLC1A1/GOT2/GATM/PRODH/CHAC1/GGH/GSTO2/CKB/GSTA5/GSTZ1/CPT1A/CHDH/CHAC2/GSTA2/ACADL/AASDHPPT/CPT2/HOGA1/PLA1A/SLC22A4/GGTLC1/SULT1B1/ALDH9A1/GLO1/GCLC/PTGES2/CNDP2/BHMT/CRAT/PLA2G12A/FOLR1/MBOAT2/CROT/MTHFS/SERINC1/PLA2G4A/OSB…
GOBP_FATTY_ACID_CATABOLIC_PROCESS	GOBP_FATTY_ACID_CATABOLIC_PROCESS	106	0.583601	2.19113	1.10204e-09	1.60603e-07	1.34436e-07	10058	tags=59%, list=18%, signal=49%	CEL/HAO1/FABP1/ABCB11/HAO2/ACAT1/SLC27A2/PHYH/PCCA/PCCB/AUH/PCK1/ACADM/ABHD3/PLIN5/ABHD2/EHHADH/ACAA2/MMUT/PEX7/ABCD3/PCK2/HADH/ETFDH/ADTRP/ACOX2/ETFA/PECR/HADHB/ECI2/SLC27A4/CPT1A/AMACR/HSD17B4/ACADL/CPT2/BDH2/ILVBL/IVD/ACOX1/ACAD11/DECR1/HACL1/ECHDC1/ACADS/SCP2/LEP/CRAT/HADHA/NUDT7/CROT/ECHS1/ECI1/MLYCD/PEX2/ACBD5/AIG1/MMAA/ALDH3A2/GCDH/PPARA/ACAA1/PEX13
GOCC_PROTON_TRANSPORTING_TWO_SECTOR_ATPASE_COMPLEX	GOCC_PROTON_TRANSPORTING_TWO_SECTOR_ATPASE_COMPLEX	52	0.733001	2.48155	1.23046e-09	1.75421e-07	1.46839e-07	8247	tags=54%, list=15%, signal=46%	ATP6V1G3/ATP6V0A4/ATP6V0D2/ATP6V1B1/ATP6V1C2/ATP6V1A/ATP5F1A/ATP6V1D/ATP6AP2/ATP5MC3/ATP5MG/ATP5F1B/ATP6V0B/ATP6V1H/ATP5ME/PPIF/ATP6V0D1/ATP6V1E1/ATP6V0E2/ATP5PF/ATP5PB/ATP5MPL/DMAC2L/ATP6V1G1/ATP5MC1/ATP5PO/ATP5MD/ATP6V1C1
GOBP_ISOPRENOID_METABOLIC_PROCESS	GOBP_ISOPRENOID_METABOLIC_PROCESS	142	0.528433	2.06897	1.72129e-09	2.40175e-07	2.01042e-07	8410	tags=42%, list=15%, signal=35%	ADH4/ADH1A/APOC3/CRH/APOA1/ADH1C/APOA2/CYP1A2/TTR/AKR1C4/CYP1A1/HMGCS2/CYP3A4/RDH12/RBP4/OPN1MW/GPC3/ADH6/ABCA4/RDH16/ALDH8A1/ALDH1A2/AKR1C1/TH/RLBP1/PHYH/CYP3A7/DGAT2/APOM/LRP2/UGT1A9/RDH11/ADH1B/IDI1/PNPLA4/GPC4/SDC4/UGT1A7/PECR/PDSS2/SDC2/RDH14/HMGCS1/CYP2C18/SDC1/SCPEP1/ADH5/HMGCR/COQ2/CYP26C1/AKR1B1/CYP4V2/RDH10/NAPEPLD/CRPPA/CYP3A5/BCO1/PDSS1/CYP2E1
GOMF_SULFUR_COMPOUND_BINDING	GOMF_SULFUR_COMPOUND_BINDING	260	0.425031	1.83544	1.80556e-09	2.44105e-07	2.04332e-07	3372	tags=13%, list=6%, signal=12%	HRG/APOA5/DEFB106A/SERPINC1/KNG1/FGF9/APOH/SULT2A1/VTN/SMOC1/SULT1C3/SERPINA10/ELSPBP1/CEL/SERPIND1/ACOT12/BMP7/PRMT8/F11/GAL3ST3/OGDHL/SOST/GNMT/FGFBP1/SERPINA5/SLIT2/LPA/SFRP1/GPNMB/CXCL6/LIPH/PANK1/CCN6
GOBP_REGULATION_OF_WOUND_HEALING	GOBP_REGULATION_OF_WOUND_HEALING	129	0.543393	2.10853	1.8239e-09	2.44105e-07	2.04332e-07	6631	tags=28%, list=12%, signal=25%	HRG/SERPINC1/KNG1/APOH/VTN/CPB2/F7/F11/PROC/PLG/VIL1/DUOX2/REG3G/OCLN/CLDN19/CLDN4/ST3GAL4/MIR200B/CADM4/MIR221/CD9/FERMT1/AJAP1/ENPP4/PRDX2/KLKB1/MIR29A/PRKCE/ADTRP/F2RL1/CEACAM1/REG3A/SLC12A2/F12/CLDN3/PLPP3
GOBP_MONOCARBOXYLIC_ACID_CATABOLIC_PROCESS	GOBP_MONOCARBOXYLIC_ACID_CATABOLIC_PROCESS	131	0.552274	2.16971	2.30345e-09	3.01867e-07	2.52683e-07	10058	tags=60%, list=18%, signal=49%	SULT2A1/AGXT/CEL/HAO1/FABP1/ABCB11/AKR1D1/HAO2/LDHD/CYP4A11/ACAT1/CYP4F2/SLC27A2/PHYH/AGXT2/PCCA/PCCB/AUH/SORD/PCK1/ACADM/PON3/ABHD3/PLIN5/ABHD2/EHHADH/ACAA2/MMUT/PEX7/ABCD3/PCK2/CRYL1/HADH/ETFDH/ADTRP/ACOX2/ETFA/PECR/DCXR/HADHB/ECI2/SLC27A4/CPT1A/AMACR/HSD17B4/ACADL/CPT2/IDNK/BDH2/HOGA1/ILVBL/IVD/ACOX1/ACAD11/DECR1/HACL1/CYP26C1/ECHDC1/ACADS/SCP2/LEP/CRAT/HADHA/NUDT7/CROT/XYLB/ECHS1/ECI1/MLYCD/P…
GOMF_SOLUTE_CATION_SYMPORTER_ACTIVITY	GOMF_SOLUTE_CATION_SYMPORTER_ACTIVITY	99	0.590881	2.2282	2.43034e-09	3.01867e-07	2.52683e-07	7954	tags=44%, list=14%, signal=38%	SLC4A9/SLC13A2/SLC6A2/SLC6A15/SLC36A2/SLC12A3/SLC34A1/SLC10A1/SLC18A2/SLC12A1/SLC6A4/SLC5A2/SLC1A6/SLC5A1/SLC13A1/SLC5A8/SLC45A2/SLC10A2/SLC6A20/SLC4A5/SLC6A13/SLC5A10/SLC15A2/SLC34A3/SLC17A2/SLC4A4/SLC1A1/SLC17A7/SLC10A5/SLC4A10/SLC39A8/SLC1A2/SLC5A12/SLC12A2/SLC13A3/SLC2A13/MFSD3/SLC25A3/SLC6A12/SLC17A5/SLC5A11/SLC13A5/SLC17A3/SLC22A1
GOBP_TRANSLATIONAL_TERMINATION	GOBP_TRANSLATIONAL_TERMINATION	105	0.573449	2.15799	2.43532e-09	3.01867e-07	2.52683e-07	14036	tags=66%, list=25%, signal=50%	MRPL53/MRPL34/MRPS28/EIF5A2/MRPL50/MRPS35/APEH/MRPS36/MRPL44/MRPL19/ETF1/MRPL15/GFM2/MRPL49/MRPL35/MRPS30/MRPL13/MRPS16/MRPS22/GSPT1/MRPL3/MRPL1/MRPS18A/MRPL47/MRPL54/MRPS18B/MRPL48/MRPS9/MRPS10/ABCE1/MRPL30/MRPS33/MRPL42/GSPT2/MRPL45/MRPL41/MRPL39/CHCHD1/MRPL4/MRPL16/MRPL32/MRPL21/MRPS23/MRPS14/OGFOD1/MRPS31/MRPS7/MRPL22/MRPL14/MRPS25/MRPS18C/MRPL11/MRPL12/MRPS2/MRPL58/MRPS5/MRPL33/MRPL27/MRPL43…
GOBP_MITOCHONDRIAL_MEMBRANE_ORGANIZATION	GOBP_MITOCHONDRIAL_MEMBRANE_ORGANIZATION	141	0.522537	2.05068	2.43961e-09	3.01867e-07	2.52683e-07	14174	tags=62%, list=25%, signal=46%	SLC25A5/ATP5F1A/ACAA2/APOO/ATP5MC3/ATP5MG/ATP5F1B/GHITM/MAIP1/TIMM10B/MIR29A/SLC35F6/ATP5ME/HSP90AA1/CHCHD10/PPIF/AFG3L2/HSPA4/APOOL/HSPA9/MUL1/ATP5PF/ATP5PB/DMAC2L/PMAIP1/TIMM8B/BOK/IMMT/TMEM14A/TIMM10/PINK1/FZD9/SFN/ATP5MC1/ATP5PO/MOAP1/COX18/CLN8/OPA1/MPV17L/MTX2/CIBAR1/ATP5F1C/LETM1/CHCHD3/TOMM70/BCL2/MFN2/OMA1/ALKBH7/ATP5PD/VDAC2/BLOC1S2/SAMM50/MAPK8/BNIP3/GSK3B/MICOS10/TOMM22/YWHAB/AP3B1/TF…
GOBP_CELLULAR_RESPONSE_TO_STARVATION	GOBP_CELLULAR_RESPONSE_TO_STARVATION	157	0.508333	2.0006	2.91011e-09	3.53417e-07	2.95833e-07	11847	tags=42%, list=21%, signal=33%	GCGR/KRT20/ALB/NUPR2/SLC38A3/DAPL1/FOXA3/PCSK9/SFRP1/GABARAPL1/RRAGD/RNF152/PCK1/KLF10/GABARAPL3/AOC1/HSPA8/PRKAA2/UPP1/CPEB4/DSC2/FOXO1/GABARAPL2/PMAIP1/PRKAG2/SESN3/SIK2/PIK3R4/WNT9B/EIF2AK3/SEH1L/EIF2S1/LAMP2/NFE2L2/GAS6/RRAGA/MAP1LC3B/ATG5/SLC39A5/PDK4/XBP1/BCL2/HSPA5/MAPK1/WIPI1/PPARA/STK24/RALB/MAP1LC3A/XPR1/PRKAG1/IMPACT/ATF3/MAPK8/SREBF2/NUAK2/BMT2/PRKAA1/PRKD1/BMPR2/ZFYVE1/DAP/WIPI2/RRAG…
GOBP_NUCLEOSIDE_BISPHOSPHATE_METABOLIC_PROCESS	GOBP_NUCLEOSIDE_BISPHOSPHATE_METABOLIC_PROCESS	140	0.535797	2.09284	3.4051e-09	4.06012e-07	3.39858e-07	11248	tags=53%, list=20%, signal=43%	BAAT/SULT2A1/SULT1C3/ACOT12/HMGCS2/ACAT1/ELOVL4/PANK1/ACOT1/ACOT11/ACSL1/DGAT2/SCD5/ACSL6/ACSBG1/ACSM2B/ACOT4/DLD/ELOVL7/SUCLA2/PDP1/GLYAT/HSD17B12/HSD17B8/DLAT/FITM2/ENPP1/PDHA1/ACOT2/ACSL3/PDP2/SUCLG2/GSTZ1/PDHX/HSD17B4/HMGCS1/PDHB/OGDH/SULT1C4/SULT1B1/HMGCR/MPC2/CBR4/MCCC2/ACSM2A/DLST/HACD2/NUDT7/CROT/ACSL4/ACSS1/GPAM/MLYCD/BPNT1/BPNT2/PANK3/PDK2/KYNU/PDK4/GCDH/OXSM/AADAT/FAR2/PPCS/ACSM3/ACSM5…
GOMF_ATPASE_COUPLED_ION_TRANSMEMBRANE_TRANSPORTER_ACTIVITY	GOMF_ATPASE_COUPLED_ION_TRANSMEMBRANE_TRANSPORTER_ACTIVITY	46	0.749233	2.46752	3.96152e-09	4.63922e-07	3.88333e-07	8247	tags=54%, list=15%, signal=47%	ATP6V1G3/ATP6V0A4/ATP6V0D2/ATP6V1C2/ATP4B/ATP12A/ABCB11/KCNJ11/ATP6V1A/ATP4A/ATP2B3/ATP6V1D/ATP5F1B/ATP6V0B/ATP6V1H/ABCC4/ATP2B2/ATP6V0D1/ATP6V1E1/ATP6V0E2/ATP2C2/ATP8A1/ATP6V1G1/PCYOX1/ATP6V1C1
GOBP_ALPHA_AMINO_ACID_CATABOLIC_PROCESS	GOBP_ALPHA_AMINO_ACID_CATABOLIC_PROCESS	87	0.600525	2.18779	5.24637e-09	5.93957e-07	4.9718e-07	9529	tags=55%, list=17%, signal=46%	TAT/OTC/AGXT/ARG1/PAH/SLC25A21/DAO/ACAT1/ALDH8A1/CRYM/GOT1/AGXT2/NOS2/ARG2/ACMSD/ACADSB/ALDH4A1/DLD/DDAH1/QDPR/ASRGL1/GOT2/PRODH/DDO/GPT2/HGD/CDO1/GLUD1/GSTZ1/RIDA/OGDH/PCBD1/HOGA1/OAT/GLUD2/SDSL/PRODH2/GLDC/DLST/GPT/MAT1A/GLS/ALDH7A1/SHMT1/SDS/KYNU/GCAT/GCDH
GOBP_TRANSITION_METAL_ION_TRANSPORT	GOBP_TRANSITION_METAL_ION_TRANSPORT	127	0.541285	2.10224	5.33073e-09	5.93957e-07	4.9718e-07	9814	tags=39%, list=17%, signal=32%	ATP6V1G3/HRG/ATP6V0A4/ATP6V0D2/ATP6V1B1/ATP6V1C2/HPX/LCN2/SLC39A2/ATP6V1A/NOX5/SLC30A2/TRPC7/STEAP2/ATP6V1D/ATP6V0B/ATP6V1H/SLC30A9/SLC39A8/TRPC5/SLC31A1/SLC40A1/ATP6V0D1/ATP6V1E1/ATP6V0E2/ATP2C2/MMGT1/ATP6V1G1/ISCU/TCN1/ATP6V1C1/CLTC/ATOX1/SLC48A1/TCN2/SLC30A1/ATP7B/SLC39A9/ATP6V0E1/B2M/COX17/ATP7A/SLC39A5/TFRC/ATP2C1/SLC30A10/SLC30A8/SLC30A6/ATP6V1F
GOMF_ODORANT_BINDING	GOMF_ODORANT_BINDING	114	-0.640264	-1.82077	5.34362e-09	5.93957e-07	4.9718e-07	14685	tags=62%, list=26%, signal=46%	OR8D4/OR5AN1/OR9Q1/OBP2B/OR5B21/OR2A4/OR5H14/OR5AU1/OR5P3/OR5D16/OR8B4/OR6K6/OR2A25/OR8D1/GPR148/OR9K2/OR5B17/OR9G4/OR5B12/OR5AK2/OR12D1/OR10T2/OR8K5/OR5H1/OR1K1/OR5A2/OR8J3/OR5B3/OR8B2/OR10W1/OR10J4/OR10J1/OR5D18/OR4E2/OR5H15/OR5D13/OR10R2/OR13A1/OR10Z1/OR6B3/OR8I2/OR14C36/OR10J3/OR10V1/OR8B12/OR6B2/OR5D14/OR8J2/OBP2A/OR5H2/OR8H2/OR5M3/OR5AC2/OR5A1/OR8G2P/OR5AS1/OR5M11/OR5C1/OR8J1/OR6N2/OR5F1/OR…
GOBP_CELLULAR_HORMONE_METABOLIC_PROCESS	GOBP_CELLULAR_HORMONE_METABOLIC_PROCESS	135	0.512544	2.00176	8.25696e-09	9.02486e-07	7.55439e-07	8224	tags=35%, list=14%, signal=30%	ADH4/ADH1A/CYP17A1/ADH1C/UGT2B15/CYP1A2/UGT2B4/DHRS2/TTR/AKR1C4/CYP1A1/CYP3A4/HSD17B6/RDH12/RBP4/AKR1D1/CYP11A1/PPARGC1A/ADH6/RDH16/ALDH8A1/ALDH1A2/AKR1C1/FDX1/CYP3A7/DGAT2/UGT1A9/RDH11/ADH1B/PNPLA4/HSD17B12/HSD17B8/FSHB/UGT1A7/SRD5A2/HSD17B4/RDH14/CYP2C18/DHRS11/SCPEP1/CYP26C1/AKR1B1/RDH10/BMP2/CYP3A5/BCO1/SHH
GOBP_MITOCHONDRIAL_TRANSLATIONAL_TERMINATION	GOBP_MITOCHONDRIAL_TRANSLATIONAL_TERMINATION	89	0.600643	2.18722	8.5734e-09	9.21711e-07	7.71532e-07	14036	tags=69%, list=25%, signal=52%	MRPL53/MRPL34/MRPS28/MRPL50/MRPS35/MRPS36/MRPL44/MRPL19/MRPL15/GFM2/MRPL49/MRPL35/MRPS30/MRPL13/MRPS16/MRPS22/MRPL3/MRPL1/MRPS18A/MRPL47/MRPL54/MRPS18B/MRPL48/MRPS9/MRPS10/MRPL30/MRPS33/MRPL42/MRPL45/MRPL41/MRPL39/CHCHD1/MRPL4/MRPL16/MRPL32/MRPL21/MRPS23/MRPS14/MRPS31/MRPS7/MRPL22/MRPL14/MRPS25/MRPS18C/MRPL11/MRPL12/MRPS2/MRPL58/MRPS5/MRPL33/MRPL27/MRPL43/MRPS12/MRPS17/MRPL36/MRPL28/MRPL57/MRPL52…
GOBP_TERPENOID_METABOLIC_PROCESS	GOBP_TERPENOID_METABOLIC_PROCESS	123	0.527733	2.03564	1.30041e-08	1.37549e-06	1.15138e-06	8134	tags=41%, list=14%, signal=35%	ADH4/ADH1A/APOC3/CRH/APOA1/ADH1C/APOA2/CYP1A2/TTR/AKR1C4/CYP1A1/HMGCS2/CYP3A4/RDH12/RBP4/OPN1MW/GPC3/ADH6/ABCA4/RDH16/ALDH8A1/ALDH1A2/AKR1C1/RLBP1/CYP3A7/DGAT2/APOM/LRP2/UGT1A9/RDH11/ADH1B/PNPLA4/GPC4/SDC4/UGT1A7/PECR/SDC2/RDH14/HMGCS1/CYP2C18/SDC1/SCPEP1/ADH5/CYP26C1/AKR1B1/CYP4V2/RDH10/NAPEPLD/CYP3A5/BCO1
GOCC_BLOOD_MICROPARTICLE	GOCC_BLOOD_MICROPARTICLE	144	0.520488	2.06244	1.34483e-08	1.3999e-06	1.17181e-06	2266	tags=16%, list=4%, signal=15%	HRG/SERPINC1/C8A/ALB/KNG1/ORM2/AHSG/SLC4A1/APOA1/ORM1/APOA2/AMBP/PON1/VTN/ITIH2/ITIH1/HPX/GC/BCHE/CFHR1/PLG/HPR/C4BPA
GOBP_EXCRETION	GOBP_EXCRETION	60	0.657888	2.29739	1.48112e-08	1.51769e-06	1.2704e-06	5943	tags=40%, list=10%, signal=36%	AQP6/ATP6V0A4/CLCNKB/ATP6V1B1/CLCNKA/UMOD/KCNJ1/NPHS2/SLC26A3/CHRNB4/AVPR1A/TAC1/NEDD4L/NPHS1/CLDN16/SPX/KCNMA1/ABCG8/CLCN5/GUCA2B/AGTR1/EDNRB/UGT1A7/AMN
GOBP_RESPONSE_TO_STARVATION	GOBP_RESPONSE_TO_STARVATION	196	0.456992	1.89733	1.69883e-08	1.71398e-06	1.43472e-06	11847	tags=39%, list=21%, signal=31%	GCGR/KRT20/ALB/NUPR2/PAGE4/SLC38A3/DAPL1/ADCYAP1/OXCT1/CPS1/FOXA3/PPARGC1A/PCSK9/SFRP1/GABARAPL1/RRAGD/RNF152/PCK1/UCN3/KLF10/PCK2/GABARAPL3/AOC1/PPARG/HSPA8/PRKAA2/UPP1/CPEB4/DSC2/FOXO1/GABARAPL2/PMAIP1/PRKAG2/SESN3/SIK2/PIK3R4/GPT/WNT9B/EIF2AK3/SEH1L/EIF2S1/LAMP2/NFE2L2/GAS6/RRAGA/MAP1LC3B/ATG5/SLC39A5/PDK4/XBP1/BCL2/HSPA5/MAPK1/WIPI1/PPARA/STK24/RALB/MAP1LC3A/XPR1/PRKAG1/IMPACT/ATF3/MAPK8/SREB…
GOBP_AEROBIC_RESPIRATION	GOBP_AEROBIC_RESPIRATION	86	0.596855	2.16472	1.79445e-08	1.78303e-06	1.49251e-06	13839	tags=71%, list=24%, signal=54%	OGDHL/NNT/MTCO2P12/CYCS/SDHD/NDUFA4/CAT/IDH3A/SUCLG1/COX7B/COX5A/DLD/SUCLA2/ACO2/UQCRC1/FH/FAHD1/DLAT/MDH1/UQCRC2/PDHA1/ACO1/COX8A/SUCLG2/SDHC/FXN/PDHB/OGDH/MTFR1/COX7A2L/COX7C/SDHB/IDH2/UQCR10/DHTKD1/AFG1L/COX6A1/DLST/SURF1/COX4I1/COX6C/COX5B/MDH2/NDUFS8/IDE/UQCRB/HIF1A/BNIP3/CS/COX10/IREB2/UQCRH/COX15/VCP/COX4I2/NDUFS7/SDHA/ATP5F1D/SIRT3/ME2/MTFR1L
GOBP_TRANSLATIONAL_ELONGATION	GOBP_TRANSLATIONAL_ELONGATION	133	0.521385	2.04195	1.88412e-08	1.84419e-06	1.54371e-06	15191	tags=68%, list=27%, signal=50%	EEF1G/MRPL53/EEF1A2/MRPL34/GFM1/MRPS28/EIF5A2/MRPL50/DPH6/MRPS35/SELENOT/CPEB3/DPH3/MRPS36/MRPL44/MRPL19/MRPL15/MRPL49/MRPL35/MRPS30/MRPL13/MRPS16/SRP9/MRPS22/MRPL3/MRPL1/MRPS18A/SECISBP2L/EEF1A1P5/MRPL47/MRPL54/MRPS18B/MRPL48/MRPS9/MRPS10/MRPL30/MRPS33/CPEB2/MRPL42/MRPL45/MRPL41/MRPL39/CHCHD1/MRPL4/MRPL16/MRPL32/TUFM/MRPL21/MRPS23/MRPS14/SECISBP2/MRPS31/MRPS7/MRPL22/GRM5/MRPL14/MRPS25/MRPS18C/EE…
GOMF_STEROID_BINDING	GOMF_STEROID_BINDING	100	0.56809	2.12766	1.97809e-08	1.8875e-06	1.57996e-06	4362	tags=20%, list=8%, signal=18%	APOA5/APOC3/APOA1/APOA2/APOF/CALB1/GC/CYP3A4/HSD11B2/ESRRG/AKR1D1/KL/ESRRB/NR3C2/PAQR5/SERPINA6/PGR/ATP1A1/VDR/GRAMD1C
GOBP_DETECTION_OF_CHEMICAL_STIMULUS	GOBP_DETECTION_OF_CHEMICAL_STIMULUS	499	-0.491226	-1.50173	1.98593e-08	1.8875e-06	1.57996e-06	14894	tags=48%, list=26%, signal=36%	FOXA2/OR1F1/OR2T7/OR4C13/OR10K2/GCK/OR6V1/OR2M5/OR1Q1/OR1E1/OR51Q1/OR52N2/OR2M4/OR9A1P/OR52B2/OR8D4/OR5AN1/KCNIP2/OR4D6/OR9Q1/OR4A16/OR2T27/OR52Z1/OR7A5/OR3A1/OR5B21/OR2A4/OR52A4P/OR5H14/OR13J1/OR13C7/OR4K13/PKD1L3/OR51J1/CA6/OR4K1/OR5AU1/OR13C9/OR13C6P/OR5P3/SSC5D/OR5D16/OR8B4/OR6K6/OR3A2/OR9G1/OR7A10/OR1F12/OR2A25/DRGX/TAS2R9/DMBT1/OR11H4/OR8D1/GPR148/OR9K2/OR5B17/OR2J3/OR6X1/OR9G4/OR5B12/OR4F5…
GOBP_ATP_SYNTHESIS_COUPLED_ELECTRON_TRANSPORT	GOBP_ATP_SYNTHESIS_COUPLED_ELECTRON_TRANSPORT	100	0.567226	2.12443	2.1025e-08	1.96974e-06	1.6488e-06	13217	tags=70%, list=23%, signal=54%	NDUFC2-KCTD14/MTCO2P12/CYCS/UQCRFS1/SDHD/NDUFA4/COX7B/UQCRFS1P1/NDUFS1/COX5A/DLD/GHITM/UQCRC1/NDUFB6/NDUFB5/NDUFC2/UQCRQ/UQCRC2/NDUFAB1/COQ9/COX8A/NDUFB2/NDUFA6/NDUFB1/NDUFA5/SDHC/COX7A2L/NDUFB3/COX7C/CYC1/NDUFB9/UQCR10/AFG1L/NDUFA9/COX6A1/ISCU/PINK1/NDUFA8/COX4I1/NDUFS4/NDUFS3/NDUFAF1/NDUFS6/NDUFC1/NDUFA10/COX6C/NDUFV1/COX5B/CHCHD2/NDUFB7/NDUFA2/UQCR11/NDUFS8/UQCRB/COX10/SNCA/UQCRH/NDUFA1/DNAJC1…
GOBP_PH_REDUCTION	GOBP_PH_REDUCTION	58	0.675532	2.35041	2.17303e-08	2.00714e-06	1.68011e-06	6925	tags=31%, list=12%, signal=27%	ATP6V1G3/ATP6V0A4/ATP6V0D2/ATP6V1B1/ATP6V1C2/ATP4B/TTPA/AVPR1A/CA2/ATP6V1A/ATP6V1D/ATP6AP2/ATP6V0B/ATP6V1H/ATP6V0D1/ATP6V1E1/ATP6V0E2/CLIC4
GOMF_HEPARIN_BINDING	GOMF_HEPARIN_BINDING	164	0.477263	1.88883	2.45026e-08	2.23178e-06	1.86814e-06	3372	tags=15%, list=6%, signal=14%	HRG/APOA5/DEFB106A/SERPINC1/KNG1/FGF9/APOH/VTN/SMOC1/SERPINA10/ELSPBP1/CEL/SERPIND1/BMP7/F11/SOST/FGFBP1/SERPINA5/SLIT2/LPA/SFRP1/GPNMB/CXCL6/LIPH/CCN6
GOMF_SOLUTE_SODIUM_SYMPORTER_ACTIVITY	GOMF_SOLUTE_SODIUM_SYMPORTER_ACTIVITY	72	0.62455	2.28722	2.72991e-08	2.45243e-06	2.05284e-06	7954	tags=50%, list=14%, signal=43%	SLC4A9/SLC13A2/SLC6A2/SLC6A15/SLC12A3/SLC34A1/SLC10A1/SLC18A2/SLC12A1/SLC6A4/SLC5A2/SLC1A6/SLC5A1/SLC13A1/SLC5A8/SLC10A2/SLC6A20/SLC4A5/SLC6A13/SLC5A10/SLC34A3/SLC17A2/SLC4A4/SLC1A1/SLC17A7/SLC10A5/SLC4A10/SLC1A2/SLC5A12/SLC12A2/SLC13A3/SLC6A12/SLC5A11/SLC13A5/SLC17A3/SLC22A1
GOCC_PIGMENT_GRANULE	GOCC_PIGMENT_GRANULE	106	0.549795	2.0642	2.84192e-08	2.48647e-06	2.08133e-06	14740	tags=59%, list=26%, signal=44%	MLANA/PMEL/TYR/GPR143/TYRP1/MYRIP/GPNMB/SLC45A2/TH/ATP1A1/TMEM33/GGH/HSP90AA1/SYPL1/HSPA8/RAB9A/SLC3A2/RAB17/STX3/RAB29/CLTC/PDCD6IP/MREG/RAB1A/BSG/RAB32/TFRC/HSPA5/RPN1/RAB5A/LAMP1/SDCBP/RAB7A/RAB2A/RAB5C/YWHAB/CANX/SYNGR1/GCHFR/CCT4/AHCY/YWHAE/TPP1/ATP6V1B2/ATP6V0A1/PDIA6/TMED10/MYO7A/CTSB/CTSD/RAN/GNA13/ATP1B3/ATP6V1G2/CTNS/ANKRD27/RAB27A/STOM/ANXA11/CAPG/DNAJC5/RAB38/SEC22B
GOMF_ELECTRON_TRANSFER_ACTIVITY	GOMF_ELECTRON_TRANSFER_ACTIVITY	138	0.507251	1.96731	2.84363e-08	2.48647e-06	2.08133e-06	13217	tags=64%, list=23%, signal=50%	CYP1A2/AKR1C4/NDUFC2-KCTD14/HSD17B6/MTCO2P12/RDH16/COX7A1/DHDH/UQCRFS1/FDX1/SDHD/NDUFA4/AKR7A3/COX7B/UQCRFS1P1/NDUFS1/COX5A/ALDH4A1/QDPR/UQCRC1/NDUFB6/NDUFB5/NDUFC2/ETFDH/UQCRQ/ETFA/NDUFAB1/PHGDH/COX8A/NDUFB2/NDUFA6/NDUFB1/COX7A2/NDUFA5/SDHC/COX7A2L/NDUFB3/COX7C/ME1/ADH5/CYB5A/SDHB/NDUFB9/UQCR10/AKR1B1/NDUFA9/GLDC/COX6A1/CIAPIN1/NDUFA8/COX11/SURF1/COX4I1/NDUFS4/AKR7A2/DMGDH/AOX1/NDUFS3/NDUFS6/NDU…
GOBP_RESPONSE_TO_CARBOHYDRATE	GOBP_RESPONSE_TO_CARBOHYDRATE	220	0.441371	1.8366	2.95948e-08	2.55372e-06	2.13763e-06	9323	tags=29%, list=16%, signal=24%	NR0B2/MIR15A/NKX6-1/CFTR/CRH/APOA2/EPHA5/CYP7A1/CPB2/OXCT1/MAFA/PFKFB2/CASR/PDX1/KCNJ11/PPARGC1A/ACVR1C/PKLR/GRIK5/G6PC/GOT1/TH/GJB6/COLEC12/CLTRN/GYS2/APOM/CAT/VSNL1/PCK1/MIR221/KHK/UCN3/CMA1/ILDR2/PCK2/PRKCE/ENDOG/SELENOT/RAB11FIP2/GPR27/PRKAA2/CCDC186/RAB11FIP5/NKX2-2/ME1/MPC2/LEP/NDUFA9/UNC13B/CAMK2N1/COL4A3/OPA1/GPAM/LRP5/GPER1/MAP2K4/GSTP1/CALCRL/SRF/GCLM/ADCY5/GAS6
GOMF_SERINE_HYDROLASE_ACTIVITY	GOMF_SERINE_HYDROLASE_ACTIVITY	186	0.445468	1.86151	3.74516e-08	3.18971e-06	2.66999e-06	2838	tags=17%, list=5%, signal=16%	KLK1/KLK15/TMPRSS11E/KLK4/F9/PRSS38/TMPRSS2/KLK3/PRSS29P/TMPRSS11A/DPP10/PROZ/F7/AADAC/F11/TMPRSS4/PROC/KLK7/PRSS22/DPP6/PLG/KLK6/HPR/TMPRSS11D/TMPRSS7/HABP2/KLK2/PCSK9/PRSS3/LPA/CD5L
GOBP_PLATELET_DEGRANULATION	GOBP_PLATELET_DEGRANULATION	128	0.516342	2.00694	3.8189e-08	3.21081e-06	2.68766e-06	1836	tags=10%, list=3%, signal=10%	HRG/ALB/KNG1/ORM2/AHSG/SCG3/APOA1/ORM1/APOH/SPP2/EGF/SERPINA4/PLG
GOBP_RESPONSE_TO_MONOSACCHARIDE	GOBP_RESPONSE_TO_MONOSACCHARIDE	195	0.450315	1.85836	4.05032e-08	3.36228e-06	2.81445e-06	6962	tags=22%, list=12%, signal=19%	NR0B2/MIR15A/NKX6-1/CFTR/CRH/APOA2/EPHA5/CYP7A1/CPB2/OXCT1/MAFA/PFKFB2/CASR/PDX1/KCNJ11/PPARGC1A/ACVR1C/PKLR/GRIK5/TH/GJB6/CLTRN/GYS2/APOM/CAT/VSNL1/PCK1/MIR221/KHK/UCN3/CMA1/ILDR2/PCK2/PRKCE/ENDOG/SELENOT/RAB11FIP2/GPR27/PRKAA2/CCDC186/RAB11FIP5/NKX2-2
GOBP_PRIMARY_ALCOHOL_METABOLIC_PROCESS	GOBP_PRIMARY_ALCOHOL_METABOLIC_PROCESS	94	0.575809	2.14393	4.11838e-08	3.37604e-06	2.82597e-06	9574	tags=48%, list=17%, signal=40%	ADH4/ADH1A/ADH1C/CYP1A2/SULT2A1/TTR/AKR1C4/CYP1A1/HAO1/CYP3A4/RDH12/RBP4/CYP11A1/ADH6/ALDH1B1/RDH16/ALDH1A2/AKR1C1/CYP3A7/DGAT2/GPD1/RDH11/ADH1B/PNPLA4/PECR/RDH14/GDE1/SULT1C4/SULT1B1/ADH5/CBR4/AKR1B1/RDH10/NAPEPLD/BMP2/CYP3A5/BCO1/AKR7A2/ACSS1/BMP5/DHRS9/RETSAT/ALDH3A2/GPD2/IGF1
GOBP_LIPID_OXIDATION	GOBP_LIPID_OXIDATION	110	0.55649	2.07526	4.49893e-08	3.64028e-06	3.04715e-06	10058	tags=55%, list=18%, signal=45%	ADH4/HAO1/FABP1/ABCB11/PPARGC1A/HAO2/ACAT1/SLC27A2/PHYH/DGAT2/AUH/ACADM/PLIN5/EHHADH/ACAA2/SOX9/PEX7/ABCD3/HADH/ETFDH/ACOX2/ETFA/PECR/FABP3/NR4A3/PPARG/HADHB/ECI2/CPT1A/AMACR/HSD17B4/ACADL/CPT2/BDH2/ILVBL/IVD/ACOX1/ADH5/ACAD11/DECR1/HACL1/ECHDC1/ACADS/SCP2/LEP/CRAT/PRKAG2/CYP4V2/HADHA/CROT/ECHS1/ECI1/MLYCD/PEX2/ALDH3A2/PDK4/GCDH/PPARA/ACAA1/PEX13
GOBP_REGULATION_OF_STEROID_METABOLIC_PROCESS	GOBP_REGULATION_OF_STEROID_METABOLIC_PROCESS	121	0.519804	1.98807	4.57683e-08	3.64028e-06	3.04715e-06	8718	tags=31%, list=15%, signal=27%	APOA5/APOA1/APOA2/CGA/CYP7A1/KIT/ABCB11/MIR33A/CES1/PPARGC1A/SC5D/TTC39B/FMO5/DGAT2/FGF19/ASAH1/ATP1A1/TM7SF2/IDI1/AGTR1/FSHB/FGF1/DHCR7/MIR27B/CYP51A1/INSIG1/GAL/ACADL/HMGCS1/EPHX2/HMGCR/LEP/BMP2/LPCAT3/GPAM/BMP5/FDFT1/AGT
GOBP_BILE_ACID_METABOLIC_PROCESS	GOBP_BILE_ACID_METABOLIC_PROCESS	49	0.706433	2.37487	4.60725e-08	3.64028e-06	3.04715e-06	8068	tags=49%, list=14%, signal=42%	BAAT/SULT2A1/CYP7A1/AKR1C4/KIT/ABCB11/AKR1D1/MIR33A/CES1/AKR1C1/SLC27A2/CYP39A1/FGF19/SLC27A5/ACOX2/AMACR/HSD17B4/CYP7B1/UGT2A1/SCP2/LEP/CYP27A1/OSBP/OSBPL1A
GOBP_STEROL_HOMEOSTASIS	GOBP_STEROL_HOMEOSTASIS	92	0.576577	2.13462	4.80131e-08	3.74845e-06	3.1377e-06	10698	tags=45%, list=19%, signal=36%	APOA5/APOC3/APOA1/APOA2/CYP7A1/ABCB11/CES1/PCSK9/G6PC/AKR1C1/TTC39B/MIR208A/CYP39A1/DGAT2/APOM/ANGPTL3/ABCG8/LDLR/MIR27B/FABP3/INSIG1/LIMA1/EPHX2/CYP7B1/LIPC/MTTP/MIR33B/PLA2G12B/LRP5/NUS1/FABP4/LAMTOR1/MALRD1/XBP1/CETP/CD24/MIR132/ACSM3/TMEM97/MIR128-1/SREBF2
GOBP_REGULATION_OF_RESPONSE_TO_WOUNDING	GOBP_REGULATION_OF_RESPONSE_TO_WOUNDING	160	0.483426	1.89555	5.06391e-08	3.90695e-06	3.27038e-06	6372	tags=23%, list=11%, signal=21%	HRG/SERPINC1/KNG1/APOH/VTN/CPB2/F7/F11/PROC/PLG/VIL1/DUOX2/REG3G/OCLN/CLDN19/CLDN4/ST3GAL4/MIR200B/CADM4/MIR221/CD9/FERMT1/AJAP1/ENPP4/PRDX2/KLKB1/KLF4/MIR29A/PRKCE/ADTRP/F2RL1/MIR222/CEACAM1/REG3A/SLC12A2/F12/CLDN3
GOCC_ORGANELLAR_RIBOSOME	GOCC_ORGANELLAR_RIBOSOME	87	0.575323	2.09598	5.4395e-08	4.14793e-06	3.47209e-06	13868	tags=68%, list=24%, signal=51%	MRPL53/MRPL34/MRPS28/MRPL50/MRPS35/NDUFAB1/MRPS36/MRPL44/MRPL19/MRPL15/MRPL49/MRPL35/MRPS30/MRPL13/MRPS16/MRPS22/MRPL3/MRPS18A/MRPL47/MRPL54/MRPS18B/MRPL48/MRPS9/MRPS10/MRPL30/MRPS33/MPV17L2/MRPL42/MRPL45/MRPL41/MRPL39/MALSU1/CHCHD1/MRPL4/MRPL16/MRPL32/MRPL21/MRPS14/MRPS31/MRPS7/MRPL22/MRPL14/MRPS18C/MRPL11/MRPL12/MRPS2/MRPL58/MRPS5/MRPL33/MRPL27/MRPL43/MRPS12/MRPS17/MRPL36/MRPL28/MRPL57/MRPL52/M…
GOBP_SODIUM_ION_TRANSMEMBRANE_TRANSPORT	GOBP_SODIUM_ION_TRANSMEMBRANE_TRANSPORT	171	0.4612	1.8617	6.20381e-08	4.67639e-06	3.91444e-06	5998	tags=27%, list=11%, signal=24%	FXYD4/SLC4A9/SLC9A4/SLC24A2/SLC6A2/SLC9A2/SLC6A15/SLC12A3/HCN2/ATP4B/SLC34A1/SLC12A1/ATP12A/SCNN1A/SLC6A18/ABCB11/SCN2B/SLC6A4/SLC5A2/PCSK9/GPD1L/SLC5A1/SLC6A19/WNK3/ATP4A/NEDD4L/PTPN3/SLC6A20/ANK3/SCN2A/SLC4A5/ATP1A1/SLC4A11/SLC6A13/SLC5A10/SLC34A3/SLC17A2/SLC4A4/SLC17A7/HECW1/SLC4A10/PRKCE/HCN4/FGF12/TESC/SLC12A2
GOBP_LIPOPROTEIN_METABOLIC_PROCESS	GOBP_LIPOPROTEIN_METABOLIC_PROCESS	131	0.517074	2.03142	6.88495e-08	5.13085e-06	4.29486e-06	11092	tags=37%, list=20%, signal=30%	HHATL/APOA5/APOC3/APOA1/APOA2/CWH43/PCSK9/ZDHHC23/DGAT2/APOM/SVIP/ZDHHC2/ABHD17C/ZDHHC3/LYPLA1/PPM1A/ABHD10/PIGH/LYPLAL1/PGAP4/HHAT/PIGW/NOTUM/ABHD17B/APOLD1/ABHD13/LEP/ZDHHC21/PPM1B/PIGO/RABL3/MTTP/ZDHHC13/ZDHHC4/PIGA/PIGK/ATG5/GOLGA7/PIGX/MPPE1/WIPI1/PPARA/ZDHHC9/ZDHHC15/PIGF/PIGS/DPM1/DBI/SELENOK
GOBP_TRIGLYCERIDE_METABOLIC_PROCESS	GOBP_TRIGLYCERIDE_METABOLIC_PROCESS	107	0.540662	2.02811	7.39205e-08	5.44686e-06	4.55938e-06	6973	tags=30%, list=12%, signal=26%	APOA5/APOC3/APOA1/APOA2/APOH/THRSP/AADAC/CPS1/FABP1/GPAT3/PCSK9/G6PC/LIPH/ACSL1/DGAT2/GK/CAT/PCK1/SLC27A5/PLIN5/RGN/LDLR/PCK2/PNPLA4/FITM2/SORL1/MOGAT2/FABP3/INSIG1/CPT1A/ABHD5/SLC22A4
GOBP_POSITIVE_REGULATION_OF_WOUND_HEALING	GOBP_POSITIVE_REGULATION_OF_WOUND_HEALING	58	0.658256	2.2903	7.68943e-08	5.60303e-06	4.6901e-06	6631	tags=36%, list=12%, signal=32%	HRG/APOH/VTN/CPB2/F7/PLG/DUOX2/REG3G/OCLN/CLDN4/ST3GAL4/MIR221/FERMT1/ENPP4/PRDX2/MIR29A/PRKCE/REG3A/F12/CLDN3/PLPP3
GOCC_TIGHT_JUNCTION	GOCC_TIGHT_JUNCTION	123	0.511033	1.97123	8.32068e-08	5.9615e-06	4.99016e-06	10336	tags=39%, list=18%, signal=32%	CLDN8/EPB41L4B/CLDN6/MARVELD2/OCLN/MPP7/TJP3/CLDN19/WNK3/LIN7A/EPCAM/CLDN4/ILDR1/CGN/ANK3/CLDN16/MARVELD3/POF1B/CLDN7/CLDN10/FZD5/MAGI3/MPP5/AOC1/CLDN3/CLDN23/CRB3/PARD6A/CGNL1/USP53/CCND1/LIN7C/AMOT/VAPA/FRMPD2/CLDN34/EPHA2/PDCD6IP/CLDN14/PRKCI/PATJ/CCDC85C/MAGI2/CLDN2/CLDN12/MAGI1/CLDN17/PARD6B
GOBP_TRICARBOXYLIC_ACID_CYCLE	GOBP_TRICARBOXYLIC_ACID_CYCLE	34	0.77566	2.39788	8.36318e-08	5.9615e-06	4.99016e-06	7896	tags=65%, list=14%, signal=56%	OGDHL/NNT/SDHD/IDH3A/SUCLG1/DLD/SUCLA2/ACO2/FH/FAHD1/DLAT/MDH1/PDHA1/ACO1/SUCLG2/SDHC/PDHB/OGDH/SDHB/IDH2/DHTKD1/DLST
GOBP_RESPONSE_TO_NUTRIENT	GOBP_RESPONSE_TO_NUTRIENT	165	0.469997	1.87352	1.16021e-07	8.1579e-06	6.82869e-06	4305	tags=17%, list=8%, signal=16%	SERPINC1/GCGR/APOA1/OTC/TYR/BMP7/SLC34A1/ARG1/OXCT1/F7/CYP1A1/TTPA/BCHE/SST/AMELX/CASR/PDX1/SLC6A4/SFRP1/PKLR/SLC6A19/NNT/ALDH1A2/ASCL1/ACSL1/CAT/BCKDHB/VDR
GOBP_DICARBOXYLIC_ACID_METABOLIC_PROCESS	GOBP_DICARBOXYLIC_ACID_METABOLIC_PROCESS	96	0.558926	2.08572	1.16932e-07	8.1579e-06	6.82869e-06	11503	tags=59%, list=20%, signal=47%	TAT/HAL/GOT1/TH/PHYH/PCK1/ALDH5A1/ALDH1L1/QPRT/ACMSD/ACOT4/ALDH4A1/DLD/AMDHD1/GOT2/PRODH/PCK2/FH/DDO/GPT2/MDH1/SUCLG2/GLUD1/MRPS36/OGDH/HOGA1/OAT/ME1/GLUD2/L2HGDH/GCLC/SDHB/IDH2/PRODH2/FOLR1/DLST/MTHFS/SLC25A12/DGLUCY/MTHFD2L/GLS/SDHAF3/NAGS/SHMT1/GCLM/FTCD/KYNU/ADSS2/AADAT/MDH2/DHFRP1/KYAT3/ACLY/ATIC/DHFR/DHFR2/SLC46A1
GOMF_INORGANIC_ANION_TRANSMEMBRANE_TRANSPORTER_ACTIVITY	GOMF_INORGANIC_ANION_TRANSMEMBRANE_TRANSPORTER_ACTIVITY	145	0.481867	1.91711	1.21233e-07	8.3689e-06	7.00532e-06	5471	tags=23%, list=10%, signal=21%	AQP6/BSND/SLC26A7/CLCNKB/CFTR/SLC4A1/SLC4A9/CLCNKA/SLC6A2/SLC22A8/SLC12A3/SLC18A2/ANO5/SLC12A1/SLC26A3/SLC22A6/SLC26A4/SLC6A4/CLIC5/SLC13A1/ANO4/CLDN4/SLC22A11/SLC4A5/SLC4A11/GABRA2/SLC4A4/SLC1A1/CLCN5/GABRG1/GABRB3/SLC26A9/SLC4A10/SLC39A8
GOMF_SODIUM_ION_TRANSMEMBRANE_TRANSPORTER_ACTIVITY	GOMF_SODIUM_ION_TRANSMEMBRANE_TRANSPORTER_ACTIVITY	146	0.490327	1.95172	1.2273e-07	8.38402e-06	7.01798e-06	6146	tags=32%, list=11%, signal=28%	SLC4A9/SLC9A4/SLC13A2/SLC24A2/SLC6A2/SLC9A2/SLC6A15/SLC12A3/HCN2/SLC34A1/SLC10A1/SLC18A2/SLC12A1/ATP12A/GRIK1/SCNN1A/ABCB11/SCN2B/SLC6A4/SLC5A2/SLC1A6/GRIK5/SLC5A1/SLC13A1/SLC5A8/ATP4A/SLC10A2/SLC6A20/SCN2A/SLC4A5/ATP1A1/SLC4A11/SLC6A13/SLC5A10/SLC34A3/SLC17A2/SLC4A4/SLC1A1/SLC17A7/SLC10A5/SLC4A10/SLC1A2/SLC5A12/HCN4/SLC12A2/SLC13A3
GOBP_REGULATION_OF_LIPID_TRANSPORT	GOBP_REGULATION_OF_LIPID_TRANSPORT	151	0.474936	1.86195	1.29693e-07	8.76833e-06	7.33967e-06	9646	tags=34%, list=17%, signal=29%	APOA5/APOC3/CRH/APOA1/APOA2/PON1/PLA2G3/MIR130B/CCK/EGF/MIR33A/CES1/CYP4A11/PCSK9/AVPR1A/TAC1/CYP4F2/TTC39B/ABCA8/ACSL1/GALR1/REN/ABCG8/ENPP7/AGTR1/MIR27B/SLC12A2/FABP3/PPARG/CRY1/GAL/STXBP1/NAXE/PRKCD/AVPR1B/ATP8A1/SCP2/LEP/AGTR2/SHH/PLA2G4A/LPCAT3/MIR33B/AGT/MIR301B/FIS1/NUS1/LAMTOR1/TMEM30A/PSEN1/CETP/ARV1
GOBP_ENDOPLASMIC_RETICULUM_TO_GOLGI_VESICLE_MEDIATED_TRANSPORT	GOBP_ENDOPLASMIC_RETICULUM_TO_GOLGI_VESICLE_MEDIATED_TRANSPORT	205	0.43308	1.77777	1.35224e-07	9.04898e-06	7.57459e-06	15634	tags=61%, list=27%, signal=44%	F9/CAPZA3/PROZ/F7/PROC/SPTBN2/TMED6/ANK3/F5/F10/IER3IP1/TMED7/ANK2/SORL1/DYNLL2/TMED5/INSIG1/CD59/GOLT1A/CAPZA2/SAR1B/MIA2/SEC23B/CUL3/TRAPPC8/ACTR10/CNIH1/PPP6C/FOLR1/VTI1B/SEC24A/VAPA/DCTN3/TRAPPC6A/COPB1/RAB1A/NAPA/GAS6/DCTN6/TRAPPC2B/TRIP11/SEC23IP/TRAPPC4/MPPE1/DYNC1LI1/F8/SPTBN4/TRAPPC6B/USO1/YIF1A/SCFD1/F2/ZW10/SEC22C/SPTBN1/ARFGAP3/SEC24B/COG2/NSF/TMED1/MCFD2/STX5/ARF4/RNF139/COPG2/CTSC/R…
GOBP_POSITIVE_REGULATION_OF_RESPONSE_TO_WOUNDING	GOBP_POSITIVE_REGULATION_OF_RESPONSE_TO_WOUNDING	69	0.615788	2.22741	1.41922e-07	9.40126e-06	7.86947e-06	6631	tags=32%, list=12%, signal=28%	HRG/APOH/VTN/CPB2/F7/PLG/DUOX2/REG3G/OCLN/CLDN4/ST3GAL4/MIR221/FERMT1/ENPP4/PRDX2/MIR29A/PRKCE/MIR222/REG3A/F12/CLDN3/PLPP3
GOBP_MITOCHONDRIAL_RESPIRATORY_CHAIN_COMPLEX_ASSEMBLY	GOBP_MITOCHONDRIAL_RESPIRATORY_CHAIN_COMPLEX_ASSEMBLY	101	0.539781	2.03908	1.48482e-07	9.73747e-06	8.15089e-06	14244	tags=71%, list=25%, signal=54%	UQCRFS1/SLC25A33/AIFM1/NDUFS1/NDUFAF4/NDUFB6/NDUFB5/NDUFC2/NDUFAB1/NDUFB2/NDUFA6/DMAC1/NDUFB1/PET117/NDUFA5/TFAM/COA3/TACO1/NDUFB3/NDUFAF5/NDUFB9/NDUFA9/SDHAF4/NDUFA8/SMIM20/COX18/SURF1/TMEM126A/NDUFS4/TMEM126B/CHCHD4/NUBPL/SCO1/TIMM21/SDHAF3/NDUFS3/NDUFAF1/COX14/NDUFS6/COX17/NDUFC1/COX16/NDUFA10/LYRM7/TTC19/OMA1/NDUFV1/TIMMDC1/NDUFB7/ECSIT/NDUFA2/SDHAF1/NDUFS8/SAMM50/UQCC2/IMMP2L/NDUFA1/NDUFS2/N…
GOBP_MITOCHONDRIAL_TRANSMEMBRANE_TRANSPORT	GOBP_MITOCHONDRIAL_TRANSMEMBRANE_TRANSPORT	108	0.534128	2.00175	1.5815e-07	1.02688e-05	8.59567e-06	10241	tags=54%, list=18%, signal=44%	THRSP/SLC25A21/SLC25A5/MPC1/SLC25A4/ATP5F1A/SLC25A33/AIFM1/SFXN2/TST/ATP5MC3/ATP5MG/ATP5F1B/SLC25A15/MAIP1/MICU2/SLC39A8/ATP5ME/AFG3L2/CPT1A/SMDT1/PRKAA2/CPT2/ATP5PF/ATP5PB/TIMM17A/HSPD1/DMAC2L/MPC2/PRKAG2/MICU1/SLC25A13/ATPSCKMT/SLC25A20/VDAC1/MRS2/ATP5MC1/ATP5PO/DNAJC19/OPA1/SLC25A12/CHCHD4/GRPEL1/TIMM21/TIMM23/ATP5F1C/LETM1/MICU3/MCUR1/TOMM70/SLC25A51/STOML2/DNAJC30/PNPT1/SLC25A18/SFXN4/ATP5PD…
GOBP_REGULATION_OF_LIPID_BIOSYNTHETIC_PROCESS	GOBP_REGULATION_OF_LIPID_BIOSYNTHETIC_PROCESS	200	0.429749	1.77005	1.75294e-07	1.12704e-05	9.43404e-06	8873	tags=26%, list=16%, signal=22%	APOA5/APOC3/APOA1/CGA/PLA2G3/THRSP/CYP7A1/MIR33A/CES1/PPARGC1A/AVPR1A/SC5D/HTR2C/DGAT2/FGF19/ASAH1/PCK1/HSD17B13/ATP1A1/PLIN5/TM7SF2/RGN/ENPP7/LDLR/IDI1/FITM2/CEACAM1/FSHB/FGF1/ABHD6/DHCR7/CYP51A1/FABP3/INSIG1/ACSL3/PRKAA2/ACADL/HMGCS1/ADGRF5/CHP1/HMGCR/PRKCD/LEP/PRKAG2/RDH10/BMP2/LPCAT3/GPAM/BMP5/FDFT1/ENHO/GPER1
GOCC_APICAL_JUNCTION_COMPLEX	GOCC_APICAL_JUNCTION_COMPLEX	136	0.49341	1.92031	2.02916e-07	1.29196e-05	1.08146e-05	11004	tags=40%, list=19%, signal=33%	CLDN8/EPB41L4B/CLDN6/MARVELD2/OCLN/MPP7/TJP3/CLDN19/WNK3/LIN7A/EPCAM/CLDN4/CGN/SHROOM3/ANK3/CLDN16/CDH1/NECTIN3/MARVELD3/POF1B/CLDN7/CLDN10/FZD5/MAGI3/MPP5/AOC1/CLDN3/CLDN23/CRB3/PARD6A/CGNL1/USP53/CCND1/LIN7C/AMOT/VAPA/FRMPD2/PLEKHA7/CLDN34/PDCD6IP/CLDN14/PRKCI/PATJ/CCDC85C/CAMSAP3/MAGI2/CLDN2/CLDN12/MAGI1/CLDN17/PARD6B/CTNNA1/RHOA/STRN/DLG1
GOBP_NUCLEOSIDE_PHOSPHATE_BIOSYNTHETIC_PROCESS	GOBP_NUCLEOSIDE_PHOSPHATE_BIOSYNTHETIC_PROCESS	265	0.382101	1.65774	2.16038e-07	1.36229e-05	1.14032e-05	12916	tags=48%, list=23%, signal=37%	NMRK2/AK5/PPARGC1A/SLC22A13/ACAT1/ATP6V1A/PKLR/SLC5A8/MTCO2P12/ELOVL4/PANK1/ATP5F1A/ACSL1/SCD5/ACSL6/NUDT12/NOS2/QPRT/ACSBG1/ACMSD/RFK/DLD/ATP5MC3/ELOVL7/ATP5MG/ATP5F1B/ENTPD8/GUCA2B/HPRT1/PDP1/HSD17B12/AK3/HSD17B8/DLAT/ATP5ME/PDHA1/ACSL3/PDP2/GSTZ1/PDHX/PDHB/UPP1/ATP5PF/ATP5PB/ME1/ADK/DMAC2L/MPC2/NAXE/IDH2/CBR4/CTPS1/ADCY1/PRKAG2/SLC25A13/ATPSCKMT/PNP/PINK1/HACD2/ATP5MC1/ATP5PO/ACSL4/LDHC/ACSS1/…
GOCC_OXIDOREDUCTASE_COMPLEX	GOCC_OXIDOREDUCTASE_COMPLEX	111	0.517551	1.95411	2.31547e-07	1.44618e-05	1.21054e-05	13603	tags=67%, list=24%, signal=51%	NDUFC2-KCTD14/OGDHL/DUOX2/GMPR/GPD1L/UQCRFS1/SDHD/NDUFA4/BCKDHB/UQCRFS1P1/NDUFS1/GPD1/DLD/UQCRC1/NDUFB6/NDUFB5/NDUFC2/DLAT/UQCRQ/UQCRC2/NDUFAB1/PDHA1/NDUFB2/NDUFA6/NOXO1/DMAC1/NDUFB1/NDUFA5/PDHX/MRPS36/SDHC/PDHB/OGDH/NDUFB3/CYC1/SDHB/NDUFB9/CBR4/UQCR10/NDUFA9/GLDC/SDHAF4/DLST/NDUFA8/NDUFS4/NDUFS3/NDUFAF1/DBT/NDUFS6/PDK2/GPD2/NDUFC1/NDUFA10/NOX4/NDUFV1/NDUFB7/NDUFA2/NDUFS8/UQCRB/CYB5B/GCSH/UQCRH/N…
GOBP_STEROL_TRANSPORT	GOBP_STEROL_TRANSPORT	118	0.510101	1.91116	2.42102e-07	1.49784e-05	1.25379e-05	8781	tags=32%, list=15%, signal=27%	APOA5/APOC3/CFTR/APOA1/APOA2/PON1/MIR130B/CEL/EGF/MIR33A/CES1/PCSK9/AKR1C1/TTC39B/ABCA8/APOM/GRAMD1C/ABCG8/ENPP7/SYT7/LDLR/MIR27B/SLC22A24/LIMA1/NAXE/SCP2/LEP/LIPC/OSBP/OSBPL1A/SHH/OSBPL8/MTTP/LPCAT3/MIR33B/CD36/MIR301B/SERAC1
GOMF_OXIDOREDUCTASE_ACTIVITY_ACTING_ON_NAD_P_H_QUINONE_OR_SIMILAR_COMPOUND_AS_ACCEPTOR	GOMF_OXIDOREDUCTASE_ACTIVITY_ACTING_ON_NAD_P_H_QUINONE_OR_SIMILAR_COMPOUND_AS_ACCEPTOR	60	0.621117	2.16898	2.50078e-07	1.51853e-05	1.27111e-05	13159	tags=67%, list=23%, signal=51%	ADH4/AKR1C4/NDUFC2-KCTD14/AKR1C1/NDUFA4/NDUFS1/NDUFB6/NDUFB5/NDUFC2/CBR1/NDUFAB1/DHRS4/DCXR/NDUFB2/NDUFA6/NDUFB1/NDUFA5/CRYZ/NDUFB3/NDUFB9/CBR4/NDUFA9/NDUFA8/NDUFS4/NDUFS3/NDUFS6/NDUFC1/NDUFA10/NDUFV1/NDUFB7/NDUFA2/NDUFS8/NQO2/NDUFA1/NDUFS2/NDUFB10/NDUFB4/NDUFS7/NDUFB8/NDUFA12
GOMF_STEROL_BINDING	GOMF_STEROL_BINDING	60	0.621074	2.16883	2.50078e-07	1.51853e-05	1.27111e-05	375	tags=8%, list=1%, signal=8%	APOA5/APOC3/APOA1/APOA2/APOF
GOCC_VACUOLAR_PROTON_TRANSPORTING_V_TYPE_ATPASE_COMPLEX	GOCC_VACUOLAR_PROTON_TRANSPORTING_V_TYPE_ATPASE_COMPLEX	18	0.874047	2.38891	2.52484e-07	1.51908e-05	1.27156e-05	562	tags=28%, list=1%, signal=28%	ATP6V1G3/ATP6V0A4/ATP6V0D2/ATP6V1B1/ATP6V1C2
GOBP_ALCOHOL_BIOSYNTHETIC_PROCESS	GOBP_ALCOHOL_BIOSYNTHETIC_PROCESS	156	0.460196	1.79359	2.56189e-07	1.52269e-05	1.27459e-05	12602	tags=48%, list=22%, signal=38%	APOA5/CFTR/APOA1/CYP7A1/HMGCS2/CYP3A4/PLCG2/LHCGR/CES1/SC5D/GOT1/PTH1R/IMPA2/ASAH1/PCK1/TM7SF2/ACAA2/QDPR/IDI1/PCK2/SPTLC3/FGF1/DHCR7/CYP51A1/INSIG1/MSMO1/PRKAA2/HMGCS1/PCBD1/IP6K3/IPPK/HMGCR/AVPR1B/PTS/AKR1B1/LEP/BMP2/CYP27A1/SPTLC2/LPCAT3/GPAM/BMP5/FDFT1/PLPP6/SPR/PGP/GPER1/NUS1/SPTLC1/IMPA1/ARV1/ERLIN2/DHFRP1/SREBF2/GCH1/REST/PRKAA1/PDXP/SNCA/ACLY/DHFR/ASAH2B/NTSR1/GGPS1/DHCR24/ERLIN1/PPIP5K1/…
GOMF_OXIDOREDUCTASE_ACTIVITY_ACTING_ON_NAD_P_H	GOMF_OXIDOREDUCTASE_ACTIVITY_ACTING_ON_NAD_P_H	102	0.539992	2.02302	2.57729e-07	1.52269e-05	1.27459e-05	12142	tags=57%, list=21%, signal=45%	ADH4/AKR1C4/NDUFC2-KCTD14/DUOX2/GMPR/NOX5/NNT/MIOX/AKR1C1/DHDH/FMO5/NDUFA4/AIFM1/NDUFS1/DLD/NDUFB6/NDUFB5/NDUFC2/CBR1/PRDX3/NDUFAB1/DHRS4/DCXR/NDUFB2/SELENOT/NDUFA6/NDUFB1/NDUFA5/TXNDC2/CRYZ/NDUFB3/NDUFB9/CBR4/NDUFA9/NDUFA8/NDUFS4/NDUFS3/NDUFS6/NDUFC1/NDUFA10/NOX4/NDUFV1/NDUFB7/NDUFA2/PGK1/NDUFS8/GSR/RNLS/TXNRD3/TXNRD2/TXN/NQO2/CYB5R1/CYB5R4/NDUFA1/NDUFS2/NDUFB10/COX15
GOMF_GLYCOSAMINOGLYCAN_BINDING	GOMF_GLYCOSAMINOGLYCAN_BINDING	227	0.408583	1.69792	2.72321e-07	1.59454e-05	1.33473e-05	3035	tags=12%, list=5%, signal=12%	HRG/APOA5/DEFB106A/SERPINC1/KNG1/FGF9/SPOCK3/APOH/VTN/SMOC1/SERPINA10/ELSPBP1/CEL/SERPIND1/BMP7/F11/SOST/FGFBP1/SERPINA5/REG3G/ZG16/HABP2/SLIT2/LPA/SFRP1/GPNMB/CXCL6/LIPH
GOBP_STEROL_BIOSYNTHETIC_PROCESS	GOBP_STEROL_BIOSYNTHETIC_PROCESS	78	0.601048	2.15518	2.84528e-07	1.65127e-05	1.38222e-05	12602	tags=49%, list=22%, signal=38%	APOA5/CFTR/APOA1/CYP7A1/HMGCS2/CES1/SC5D/TM7SF2/ACAA2/IDI1/FGF1/DHCR7/CYP51A1/INSIG1/MSMO1/PRKAA2/HMGCS1/HMGCR/PRKAG2/LPCAT3/GPAM/FDFT1/PLPP6/FAXDC2/ARV1/ERLIN2/ERG28/SREBF2/PRKAA1/ACLY/CYB5R1/GGPS1/DHCR24/ERLIN1/MBTPS2/SOD1/SQLE/ELOVL6
GOCC_MICROBODY_MEMBRANE	GOCC_MICROBODY_MEMBRANE	61	0.644758	2.2698	2.97259e-07	1.71002e-05	1.4314e-05	12083	tags=64%, list=21%, signal=50%	DAO/TMEM35A/SLC27A2/ACSL1/ACSL6/CAT/FNDC5/PNPLA8/PEX7/SYT7/ABCD3/PEX3/DHRS4/PECR/ACSL3/HSD17B4/ACOX1/HMGCR/TMEM135/ATAD1/AGPS/PXMP2/ACSL4/MPV17L/PEX2/FIS1/ACBD5/ALDH3A2/TTC1/PEX12/PEX11G/PEX13/PEX19/FAR2/SLC25A17/FAR1/PEX11B/PEX1/PEX26
GOBP_MONOCARBOXYLIC_ACID_TRANSPORT	GOBP_MONOCARBOXYLIC_ACID_TRANSPORT	178	0.448602	1.82368	3.14414e-07	1.7891e-05	1.49759e-05	8693	tags=34%, list=15%, signal=29%	NR0B2/PLA2G4F/PLA2G3/SLCO1B1/CYP7A1/RIMS1/AKR1C4/SLC10A1/SLC22A9/CCK/SLC16A7/SLC16A11/ABCB11/MIR33A/CES1/CASR/SLC22A13/SLC51B/SLC1A6/AVPR1A/GRM1/SLC5A8/SLC16A9/MPC1/AKR1C1/SLC10A2/NOS2/SLC27A5/SLC6A13/KCNJ10/PNPLA8/SLC1A1/SLC17A7/SLC10A5/SLC16A6/SLC1A2/CEACAM1/ABCC4/SLC5A12/SLC12A2/SLC51A/SLC16A12/SLC27A4/SLC16A13/SLC6A12/SLCO1A2/ABCG2/SLC16A4/MPC2/STXBP1/AVPR1B/LEP/PLA2G12A/SLC25A13/UNC13B/PLA2G…
GOCC_CHYLOMICRON	GOCC_CHYLOMICRON	13	0.916266	2.32487	3.16462e-07	1.7891e-05	1.49759e-05	360	tags=38%, list=1%, signal=38%	APOA5/APOC3/APOA1/APOA2/APOH
GOBP_CELLULAR_RESPONSE_TO_INSULIN_STIMULUS	GOBP_CELLULAR_RESPONSE_TO_INSULIN_STIMULUS	226	0.402712	1.68226	3.4375e-07	1.92676e-05	1.61283e-05	10412	tags=31%, list=18%, signal=25%	ATP6V1G3/ATP6V0A4/ATP6V0D2/AHSG/ATP6V1B1/ATP6V1C2/TRIM72/PCSK9/MIR103A1/ATP6V1A/PKLR/SLC2A4/GRB14/PDE3B/G6PC/GOT1/KL/PCK1/ATP6V1D/SLC25A33/CPEB1/VWA2/TBC1D4/ATP6V0B/ATP6V1H/PCK2/CEACAM1/SORL1/ENPP1/ECHDC3/PPARG/INSIG1/SLC27A4/ATP6V0D1/ATP6V1E1/ATP6V0E2/PIP4K2C/SLC2A8/FOXO1/PRKCD/LEP/SESN3/ATP6V1G1/SIK2/ATP6V1C1/OSBPL8/GPT/PIK3C2A/BAIAP2/OPA1/ENHO/PRKCI/ATP6V0E1/GSTP1/SYAP1/PDK2/RAB10/PDK4/XBP1/CP…
GOBP_NEUTRAL_LIPID_METABOLIC_PROCESS	GOBP_NEUTRAL_LIPID_METABOLIC_PROCESS	134	0.493643	1.93377	3.67052e-07	2.03994e-05	1.70756e-05	6368	tags=25%, list=11%, signal=22%	APOA5/APOC3/APOA1/APOA2/APOH/THRSP/AADAC/CPS1/FABP1/GPAT3/DGKI/PCSK9/G6PC/LIPH/ACSL1/DGAT2/GK/CAT/PCK1/SLC27A5/PLIN5/ABHD2/RGN/LDLR/PCK2/PNPLA4/FITM2/SORL1/ABHD6/MOGAT2/FABP3/INSIG1/CPT1A
GOBP_POSITIVE_REGULATION_OF_LIPID_BIOSYNTHETIC_PROCESS	GOBP_POSITIVE_REGULATION_OF_LIPID_BIOSYNTHETIC_PROCESS	83	0.561926	2.03894	3.84657e-07	2.11981e-05	1.77442e-05	7763	tags=28%, list=14%, signal=24%	APOA5/APOA1/CGA/PLA2G3/CYP7A1/PPARGC1A/AVPR1A/HTR2C/DGAT2/HSD17B13/PLIN5/RGN/ENPP7/LDLR/FSHB/FGF1/ABHD6/FABP3/ACSL3/ADGRF5/CHP1/PRKCD/RDH10
GOMF_OXIDOREDUCTASE_ACTIVITY_ACTING_ON_THE_CH_CH_GROUP_OF_DONORS	GOMF_OXIDOREDUCTASE_ACTIVITY_ACTING_ON_THE_CH_CH_GROUP_OF_DONORS	59	0.636249	2.23008	4.04082e-07	2.20831e-05	1.8485e-05	12142	tags=56%, list=21%, signal=44%	AKR1D1/AKR1C1/DHDH/TECRL/SDHD/ACADM/TM7SF2/ACADSB/ACOX2/DHCR7/PECR/SRD5A2/SDHC/ACADL/BDH2/IVD/ACOX1/ACAD11/DECR1/SDHB/ACAD8/ACADS/CRAT/SDHAF4/BLVRA/PTGR1/RETSAT/GCDH/ACAA1/ACAD10/ZADH2/DHCR24/COX15
GOBP_IRON_ION_TRANSPORT	GOBP_IRON_ION_TRANSPORT	79	0.589068	2.10989	4.22638e-07	2.29063e-05	1.91741e-05	2692	tags=13%, list=5%, signal=12%	ATP6V1G3/HRG/ATP6V0A4/ATP6V0D2/ATP6V1B1/ATP6V1C2/HPX/LCN2/ATP6V1A/NOX5
GOMF_POTASSIUM_ION_TRANSMEMBRANE_TRANSPORTER_ACTIVITY	GOMF_POTASSIUM_ION_TRANSMEMBRANE_TRANSPORTER_ACTIVITY	152	0.45545	1.7898	4.46094e-07	2.39794e-05	2.00723e-05	4853	tags=21%, list=9%, signal=19%	LRRC52/LRRC38/FXYD4/SLC9A4/SLC24A2/KCNE5/SLC9A2/KCNG3/SLC12A3/HCN2/ATP4B/TMEM38A/KCNJ1/KCNA1/SLC12A1/ATP12A/GRIK1/KCNJ11/KCNK15/KCNV1/GRIK5/KCNE1B/ATP4A/TMEM38B/KCNMB2/KCNH6/ATP1A1/KCNH7/KCNIP1/KCNJ10/KCNMA1/KCNA2
GOCC_BRUSH_BORDER_MEMBRANE	GOCC_BRUSH_BORDER_MEMBRANE	59	0.63458	2.22423	4.53561e-07	2.41825e-05	2.02424e-05	9402	tags=49%, list=17%, signal=41%	ATP6V0A4/SLC34A1/SLC6A18/SLC26A3/ITLN1/SLC26A4/SLC22A12/SLC5A1/SLC6A19/PTH1R/ACE2/LRP2/SLC7A9/CA4/SLC34A3/CUBN/PDZK1/CDHR2/AMN/AQP1/SLC27A4/LIMA1/ABCG2/FOLR1/SLC17A3/MTTP/CD36/ATP7A/SLC9A3R1
GOMF_NAD_BINDING	GOMF_NAD_BINDING	53	0.665403	2.26239	4.60692e-07	2.43386e-05	2.0373e-05	11530	tags=60%, list=20%, signal=48%	ADH4/HSD11B2/GPD1L/ALDH1B1/NNT/IDH3A/SORD/HPGD/GPD1/DLD/QDPR/CRYL1/HADH/HSD17B8/PHGDH/HIBADH/GLUD1/BDH2/GRHPR/ME1/IDH2/SIRT5/UXS1/AOX1/GLYR1/NDUFV1/ALDH1A1/RNLS/ALDH2/ALDH1A3/CTBP2/AHCY
GOBP_PIGMENT_METABOLIC_PROCESS	GOBP_PIGMENT_METABOLIC_PROCESS	72	0.590898	2.16399	4.6391e-07	2.43386e-05	2.0373e-05	12885	tags=56%, list=23%, signal=43%	AMBP/PMEL/TYR/GPR143/HPX/TYRP1/UGT1A4/PPARGC1A/SLC45A2/DDT/UGT1A9/ALAS1/HPRT1/UGT1A7/FXN/BDH2/PGRMC1/FECH/BLVRA/IBA57/CDH3/SHMT1/ALAD/BCL2/APPL1/SLC25A39/TMEM14C/GMPS/COX10/IREB2/ALAS2/RAPGEF2/HMBS/COX15/PPAT/UGT1A8/PAICS/GART/PRPS1/SLC25A38
GOBP_OXIDATIVE_PHOSPHORYLATION	GOBP_OXIDATIVE_PHOSPHORYLATION	148	0.469608	1.8722	4.72799e-07	2.4608e-05	2.05985e-05	13361	tags=70%, list=23%, signal=53%	NDUFC2-KCTD14/MTCO2P12/CYCS/COX7A1/UQCRFS1/ATP5F1A/SDHD/NDUFA4/COX7B/SLC25A33/UQCRFS1P1/NDUFS1/COX5A/PDE12/DLD/ATP5MC3/ATP5MG/ATP5F1B/GHITM/NIPSNAP2/UQCRC1/NDUFB6/NDUFB5/NDUFC2/UQCRQ/ATP5ME/UQCRC2/CHCHD10/NDUFAB1/COQ9/PPIF/COX8A/NDUFB2/NDUFA6/NDUFB1/COX7A2/NDUFA5/SDHC/FXN/ATP5PF/ATP5PB/COX7A2L/NDUFB3/COX7C/DMAC2L/CYC1/NDUFB9/UQCR10/AFG1L/NDUFA9/COX6A1/ATPSCKMT/ISCU/PINK1/NDUFA8/ATP5MC1/ATP5PO/SUR…
GOBP_CELLULAR_RESPONSE_TO_EXTRACELLULAR_STIMULUS	GOBP_CELLULAR_RESPONSE_TO_EXTRACELLULAR_STIMULUS	235	0.393854	1.63313	4.78378e-07	2.47024e-05	2.06775e-05	11281	tags=33%, list=20%, signal=27%	GCGR/KRT20/ALB/NUPR2/SLC38A3/DAPL1/AQP2/CASR/FOXA3/PCSK9/AVPR1A/SFRP1/GABARAPL1/RRAGD/RNF152/PCK1/VDR/UCN3/KLF10/GABARAPL3/AOC1/PPARG/DCTPP1/HSPA8/PRKAA2/UPP1/CPEB4/DSC2/FOXO1/GABARAPL2/FOSL1/PMAIP1/LEP/PRKAG2/SESN3/FOLR1/SIK2/PIK3R4/WNT9B/EIF2AK3/GSTP1/SRF/SEH1L/EIF2S1/LAMP2/PDK2/NFE2L2/GAS6/RRAGA/MAP1LC3B/ATG5/SLC39A5/PDK4/XBP1/VCAM1/BCL2/HSPA5/MAPK1/WIPI1/PPARA/STK24/RALB/MAP1LC3A/XPR1/PRKAG1/…
GOBP_TRANSFERRIN_TRANSPORT	GOBP_TRANSFERRIN_TRANSPORT	36	0.727312	2.2538	4.9824e-07	2.5527e-05	2.13678e-05	562	tags=14%, list=1%, signal=14%	ATP6V1G3/ATP6V0A4/ATP6V0D2/ATP6V1B1/ATP6V1C2
GOMF_CHOLESTEROL_BINDING	GOMF_CHOLESTEROL_BINDING	50	0.663503	2.23625	6.22969e-07	3.15646e-05	2.64217e-05	375	tags=10%, list=1%, signal=10%	APOA5/APOC3/APOA1/APOA2/APOF
GOBP_INSULIN_RECEPTOR_SIGNALING_PATHWAY	GOBP_INSULIN_RECEPTOR_SIGNALING_PATHWAY	143	0.46504	1.84641	6.2571e-07	3.15646e-05	2.64217e-05	8437	tags=24%, list=15%, signal=20%	ATP6V1G3/ATP6V0A4/ATP6V0D2/AHSG/ATP6V1B1/ATP6V1C2/TRIM72/MIR103A1/ATP6V1A/GRB14/KL/ATP6V1D/VWA2/ATP6V0B/ATP6V1H/SORL1/ENPP1/SLC27A4/ATP6V0D1/ATP6V1E1/ATP6V0E2/PIP4K2C/SLC2A8/FOXO1/PRKCD/LEP/SESN3/ATP6V1G1/SIK2/ATP6V1C1/OSBPL8/PIK3C2A/BAIAP2/OPA1
GOBP_RESPONSE_TO_TOXIC_SUBSTANCE	GOBP_RESPONSE_TO_TOXIC_SUBSTANCE	236	0.392298	1.62457	6.51071e-07	3.25447e-05	2.7242e-05	11342	tags=37%, list=20%, signal=30%	ADH4/ALB/PON1/DHRS2/SLC22A8/BMP7/ARG1/SLC18A2/CYP1A1/CPS1/FABP1/RDH12/IYD/DUOX2/SCN2B/SLC7A8/CES1/SLC6A4/NNT/DDC/TH/APOM/AKR7A3/CAT/CDH1/PON3/RDH11/HP/GSTA1/SLC15A2/ABTB2/PDZK1/MBP/PRDX2/GLYAT/GSTO2/PRDX3/SELENOT/BPHL/KCNC2/GSTZ1/CHUK/TXNDC2/FANCC/SDC1/HBG1/EPHX2/MTARC2/ABCG2/ADH5/FECH/SLC17A3/PINK1/GPX3/MGST2/GSTO1/SLC30A1/CD36/PRDX5/GSTP1/SRF/PPP1R9A/GSTM3/NFE2L2/ALAD/ATP7A/SLC30A10/SLC23A1/BCL…
GOMF_LIPID_TRANSPORTER_ACTIVITY	GOMF_LIPID_TRANSPORTER_ACTIVITY	162	0.452532	1.76925	6.55062e-07	3.25447e-05	2.7242e-05	9958	tags=37%, list=18%, signal=31%	APOA1/APOA2/APOF/SLCO1B1/AKR1C4/SLC10A1/SLC22A9/TTPA/TMEM30B/FABP1/TNFAIP8L3/CFHR4/ABCB11/RBP4/SLC51B/SLC1A6/ABCA4/SLC5A8/SLC10A2/SLC27A2/ABCA8/APOM/GRAMD1C/SLC27A5/ABCA6/ABCG8/SLC1A1/ATP9A/SLC17A7/ABCD3/SLC10A5/SLC1A2/CEACAM1/GLTPD2/FABP3/SLC51A/ATP10D/SLC27A4/SLCO1A2/PRELID3B/ATP8A1/SPNS2/SLC25A13/GLTP/OSBP/OSBPL1A/OSBPL8/MTTP/SLC25A12/ABCB1/CD36/PLEKHA3/FABP4/TMEM30A/CERT1/CETP/SLCO2A1/ARV1/AT…
GOBP_REGULATION_OF_COAGULATION	GOBP_REGULATION_OF_COAGULATION	70	0.593342	2.12497	7.10111e-07	3.50143e-05	2.93093e-05	5693	tags=26%, list=10%, signal=23%	HRG/SERPINC1/KNG1/APOH/VTN/CPB2/F7/F11/PROC/PLG/ST3GAL4/CD9/ENPP4/PRDX2/KLKB1/ADTRP/F2RL1/CEACAM1
GOMF_MONOCARBOXYLIC_ACID_TRANSMEMBRANE_TRANSPORTER_ACTIVITY	GOMF_MONOCARBOXYLIC_ACID_TRANSMEMBRANE_TRANSPORTER_ACTIVITY	69	0.59018	2.13478	7.42049e-07	3.61137e-05	3.02295e-05	7231	tags=46%, list=13%, signal=41%	SLCO1B1/AKR1C4/SLC10A1/SLC22A9/SLC16A7/SLC16A11/ABCB11/SLC22A13/SLC51B/SLC1A6/SLC5A8/SLC16A9/MPC1/SLC10A2/SLC27A2/SLC27A5/SLC6A13/SLC1A1/SLC17A7/SLC10A5/SLC16A6/SLC1A2/CEACAM1/SLC5A12/SLC51A/SLC16A12/SLC16A13/SLC6A12/SLCO1A2/ABCG2/SLC16A4/MPC2
GOBP_POTASSIUM_ION_TRANSPORT	GOBP_POTASSIUM_ION_TRANSPORT	229	0.395786	1.62914	7.4342e-07	3.61137e-05	3.02295e-05	4853	tags=17%, list=9%, signal=16%	LRRC52/LRRC38/FXYD4/SLC9A4/SLC24A2/KCNE5/SLC9A2/MTNR1B/KCNG3/SLC12A3/HCN2/ATP4B/TMEM38A/ADCYAP1/DPP10/KCNJ1/KCNA1/SLC12A1/ATP12A/KCNU1/DPP6/KCNJ11/KCNK15/KCNV1/WNK3/KCNE1B/ATP4A/NEDD4L/TMEM38B/KCNMB2/KCNH6/ANK3/ATP1A1/KCNH7/KCNIP1/KCNJ10/AMIGO1/CACNA1D/KCNMA1/KCNA2
GOBP_REGULATION_OF_SYSTEMIC_ARTERIAL_BLOOD_PRESSURE	GOBP_REGULATION_OF_SYSTEMIC_ARTERIAL_BLOOD_PRESSURE	89	0.543628	1.9796	8.06884e-07	3.86697e-05	3.2369e-05	5955	tags=25%, list=10%, signal=22%	KLK1/CALCA/CRH/KLK3/ADRB1/HSD11B2/CES1/CYP4A11/KLK2/AVPR1A/CYP4F2/ACE2/SLC4A5/SPX/SUCNR1/ATP6AP2/REN/DDAH1/CMA1/F2RL1/AGTR1/ADAMTS16
GOBP_PHAGOSOME_MATURATION	GOBP_PHAGOSOME_MATURATION	46	0.686166	2.25982	8.07829e-07	3.86697e-05	3.2369e-05	6670	tags=28%, list=12%, signal=25%	ATP6V1G3/ATP6V0A4/ATP6V0D2/ATP6V1B1/ATP6V1C2/ATP6V1A/ATP6V1D/ATP6V0B/SYT7/ATP6V1H/ATP6V0D1/ATP6V1E1/ATP6V0E2
GOBP_PHOSPHOLIPID_BIOSYNTHETIC_PROCESS	GOBP_PHOSPHOLIPID_BIOSYNTHETIC_PROCESS	266	0.374883	1.63119	8.72709e-07	4.14727e-05	3.47153e-05	10314	tags=30%, list=18%, signal=25%	INPP5J/APOA1/APOA2/PIK3C2G/CWH43/ETNPPL/HMGCS2/PLCG2/CPNE6/GPAT3/GPD1L/LIPH/CDS1/TMEM38B/ALPI/ABCA8/PIP5K1B/HTR2C/SLC44A4/ABHD3/GPD1/SGMS2/SACM1L/ETNK2/IDI1/FITM2/FABP3/CHPT1/PIGH/ACSL3/SELENOI/PGAP4/HMGCS1/PIGW/ADGRF5/ABHD5/PIP4K2C/CHP1/PTPMT1/SGMS1/MTM1/PLA2G12A/DOLK/MTMR6/PCYT2/PIGO/STARD7/STARD10/MBOAT2/SPTLC2/SERINC1/RAB14/PIK3R4/PLA2G4A/SLC44A3/PIK3C2A/ETNK1/LPCAT3/AGPAT3/GPAM/PLEKHA3/SERAC…
GOBP_INSULIN_SECRETION	GOBP_INSULIN_SECRETION	204	0.410983	1.67833	8.90016e-07	4.19908e-05	3.5149e-05	6411	tags=22%, list=11%, signal=19%	NR0B2/NKX6-1/CFTR/CRH/EPHA5/STXBP5L/MTNR1B/ADCYAP1/OXCT1/FAM3B/MAFA/MYRIP/RBP4/PFKFB2/CASR/PDX1/KCNJ11/ACVR1C/SYT9/SFRP1/SLC25A5/SLC2A2/TFAP2B/SLC25A4/SSTR5/CLTRN/DPP4/VSNL1/NOS2/CACNA1D/UCN3/ILDR2/SYT7/PCK2/ITPR2/HADH/PRKCE/SELENOT/KCNC2/RAB11FIP2/GLUD1/GPR27/CPT1A/GAL
GOBP_PHOSPHATIDYLINOSITOL_BIOSYNTHETIC_PROCESS	GOBP_PHOSPHATIDYLINOSITOL_BIOSYNTHETIC_PROCESS	114	0.499506	1.89449	9.85274e-07	4.61531e-05	3.86331e-05	14998	tags=54%, list=26%, signal=40%	INPP5J/PIK3C2G/CWH43/PLCG2/CDS1/PIP5K1B/HTR2C/SACM1L/PIGH/PGAP4/PIGW/PIP4K2C/MTM1/MTMR6/PIGO/RAB14/PIK3R4/PIK3C2A/PLEKHA3/PIGA/PI4K2B/SH3YL1/PIGK/PLEKHA1/IMPA1/MTMR12/PIGX/MPPE1/MTMR9/RAB5A/PIK3CA/PIK3R3/PIGF/PIGS/DPM1/RAB4A/INPP4B/PTPN13/PIK3CB/PIK3R1/PIKFYVE/PTEN/PIGV/PIGZ/PI4K2A/PIK3C3/MTMR2/PGAP3/PIGP/OCRL/INPP5F/PI4KA/MTMR1/SYNJ1/PIGM/PIGN/PIGB/VAC14/INPP4A/PGAP1/ARF3/PIGU
GOCC_PROTON_TRANSPORTING_V_TYPE_ATPASE_COMPLEX	GOCC_PROTON_TRANSPORTING_V_TYPE_ATPASE_COMPLEX	27	0.781297	2.28826	1.06185e-06	4.93872e-05	4.13403e-05	5206	tags=37%, list=9%, signal=34%	ATP6V1G3/ATP6V0A4/ATP6V0D2/ATP6V1B1/ATP6V1C2/ATP6V1A/ATP6V1D/ATP6AP2/ATP6V0B/ATP6V1H
GOBP_MEMBRANE_LIPID_METABOLIC_PROCESS	GOBP_MEMBRANE_LIPID_METABOLIC_PROCESS	213	0.400684	1.63899	1.07552e-06	4.9671e-05	4.15779e-05	11122	tags=39%, list=20%, signal=31%	SFTPB/CWH43/CEL/KIT/FA2H/GAL3ST3/ST8SIA5/NEU4/FUT3/CERKL/UGT8/ELOVL4/TH/ST3GAL4/B4GALT6/GBA3/ABCA8/HACD3/ASAH1/FUT6/SGPP1/ST3GAL6/SGMS2/ELOVL7/ENPP7/DEGS2/SPTLC3/SMPD1/PIGH/SPTSSA/PGAP4/PLPP3/PIGW/GLB1/ST8SIA6/PPP2CA/SGMS1/B3GALNT1/PRKCD/SUMF1/CERS4/SPNS2/PIGO/VAPA/GLTP/HACD2/SPTLC2/B4GALNT1/SERINC1/ITGB8/KDSR/ALOXE3/CLN8/ST3GAL1/MGST2/AGMO/PPM1L/PLPP1/B3GALT1/PIGA/PIGK/SPTLC1/ALDH3A2/FUCA1/SCCPD…
GOBP_REGULATION_OF_BLOOD_PRESSURE	GOBP_REGULATION_OF_BLOOD_PRESSURE	175	0.427631	1.7018	1.25598e-06	5.75993e-05	4.82144e-05	8209	tags=26%, list=14%, signal=22%	KLK1/CALCA/GCGR/CRH/KLK3/ADRB1/TACR3/HSD11B2/CES1/UTS2R/CYP4A11/KLK2/AVPR1A/TAC1/CYP4F2/ACE2/SLC4A5/ATP1A1/NOS2/TRHDE/SPX/SUCNR1/ATP6AP2/REN/DDAH1/CMA1/F2RL1/AGTR1/EDNRB/ADAMTS16/MIR27B/PPARG/RENBP/MKKS/PRCP/SCPEP1/ADH5/AVPR1B/LEP/AGTR2/NPR3/ADM2/CAMK2N1/SGK1/ADRB2
GOBP_RENAL_SYSTEM_PROCESS	GOBP_RENAL_SYSTEM_PROCESS	118	0.484553	1.81544	1.49226e-06	6.79598e-05	5.68868e-05	9939	tags=43%, list=17%, signal=36%	SLC4A1/ATP6V1B1/UMOD/AQP2/TRPV5/HSD11B2/SLC22A6/CHRNB4/CYP4A11/AVPR1A/KLHL3/TAC1/BTC/TFAP2B/CLDN4/CYP4F2/MYO5B/SLC4A5/SPX/SUCNR1/REN/KCNMA1/SLC15A2/LGMN/F2RL1/AGTR1/EDNRB/TMEM63C/AQP1/RAB11FIP2/ADGRF5/KCNQ1/PRKAR1A/AKR1B1/ADCY1/AGTR2/NPR3/CHRNA3/PRKACB/SGK1/AQP4/AGT/RAB11A/ADCY5/GAS6/PRKAR2A/SLC9A3R1/ADCY9/BCL2/WFS1/HBB
GOBP_INNER_MITOCHONDRIAL_MEMBRANE_ORGANIZATION	GOBP_INNER_MITOCHONDRIAL_MEMBRANE_ORGANIZATION	56	0.627398	2.19151	1.56246e-06	7.038e-05	5.89126e-05	12707	tags=71%, list=22%, signal=56%	ATP5F1A/APOO/ATP5MC3/ATP5MG/ATP5F1B/GHITM/MAIP1/TIMM10B/ATP5ME/CHCHD10/AFG3L2/APOOL/HSPA9/ATP5PF/ATP5PB/DMAC2L/TIMM8B/IMMT/TIMM10/PINK1/ATP5MC1/ATP5PO/OPA1/MTX2/CIBAR1/ATP5F1C/LETM1/CHCHD3/TOMM70/OMA1/ATP5PD/SAMM50/MICOS10/ATP5F1E/MICOS13/TIMM13/TIMM22/CHCHD6/TIMM9/ADCK1
GOBP_REGULATION_OF_FATTY_ACID_METABOLIC_PROCESS	GOBP_REGULATION_OF_FATTY_ACID_METABOLIC_PROCESS	97	0.518032	1.92839	1.56686e-06	7.038e-05	5.89126e-05	6527	tags=27%, list=11%, signal=24%	APOA5/APOC3/APOA1/PLA2G3/CYP7A1/FABP1/ABCB11/MIR33A/PPARGC1A/SLC22A13/AVPR1A/DGAT2/PLIN5/RGN/SOX9/PDP1/CEACAM1/FABP3/NR4A3/PPARG/INSIG1/PDP2/GSTZ1/CPT1A/PRKAA2/ACADL
GOBP_PHAGOSOME_ACIDIFICATION	GOBP_PHAGOSOME_ACIDIFICATION	28	0.776979	2.28822	1.58667e-06	7.07851e-05	5.92517e-05	6670	tags=43%, list=12%, signal=38%	ATP6V1G3/ATP6V0A4/ATP6V0D2/ATP6V1B1/ATP6V1C2/ATP6V1A/ATP6V1D/ATP6V0B/ATP6V1H/ATP6V0D1/ATP6V1E1/ATP6V0E2
GOMF_TETRAPYRROLE_BINDING	GOMF_TETRAPYRROLE_BINDING	150	0.450006	1.78074	1.71353e-06	7.59279e-05	6.35566e-05	8540	tags=31%, list=15%, signal=27%	HRG/CYP2A6/CYP17A1/CYP1A2/AMBP/CYP2A7/CYP7A1/CYP1A1/FA2H/CYP3A4/NGB/CYP11A1/DUOX2/CYP2B6/CYP4A22/CYP4A11/NOX5/CYCS/CYP4F2/MB/CYP39A1/CYP3A7/SDHD/CAT/NOS2/MMUT/CUBN/HCCS/CYP51A1/SDHC/CYP2C18/CYP2J2/HBG1/PGRMC1/LMBRD1/CYP7B1/CYB5A/CYC1/CYP26C1/PTGES2/CYP4V2/CYP27A1/CYP3A5/TCN1/CYP2E1/SLC48A1/TCN2
GOBP_POSITIVE_REGULATION_OF_LIPID_METABOLIC_PROCESS	GOBP_POSITIVE_REGULATION_OF_LIPID_METABOLIC_PROCESS	148	0.453502	1.80799	1.88076e-06	8.27787e-05	6.92912e-05	7371	tags=24%, list=13%, signal=21%	APOA5/APOA1/APOA2/CGA/PLA2G3/CYP7A1/KIT/AADAC/FABP1/TNFAIP8L3/CES1/PPARGC1A/AVPR1A/HTR2C/DGAT2/EEF1A2/ANGPTL3/HSD17B13/PLIN5/RGN/ENPP7/LDLR/PRKCE/AGTR1/FSHB/FGF1/ABHD6/FABP3/NR4A3/PPARG/ACSL3/CPT1A/ADGRF5/ABHD5/CHP1/PRKCD
GOCC_BRUSH_BORDER	GOCC_BRUSH_BORDER	101	0.510529	1.92858	2.09334e-06	9.15207e-05	7.66088e-05	6526	tags=32%, list=11%, signal=28%	ATP6V0A4/SLC34A1/SLC6A18/SLC26A3/ITLN1/VIL1/SLC26A4/SLC22A12/MYO7B/SLC2A2/SLC5A1/SLC6A19/MYH14/PTH1R/ACE2/ANKS4B/LRP2/PLS1/SLC7A9/CA4/SLC34A3/CUBN/PDZK1/CDHR2/EZR/AMN/DCXR/ESPN/AQP1/SLC27A4/CAPZA2/LIMA1
GOBP_BILE_ACID_BIOSYNTHETIC_PROCESS	GOBP_BILE_ACID_BIOSYNTHETIC_PROCESS	38	0.692421	2.16286	2.12024e-06	9.2083e-05	7.70794e-05	8068	tags=50%, list=14%, signal=43%	BAAT/CYP7A1/AKR1C4/ABCB11/AKR1D1/MIR33A/CES1/SLC27A2/CYP39A1/FGF19/SLC27A5/ACOX2/AMACR/HSD17B4/CYP7B1/SCP2/CYP27A1/OSBP/OSBPL1A
GOCC_INTRINSIC_COMPONENT_OF_MITOCHONDRIAL_MEMBRANE	GOCC_INTRINSIC_COMPONENT_OF_MITOCHONDRIAL_MEMBRANE	86	0.538853	1.95435	2.15705e-06	9.30655e-05	7.79019e-05	14124	tags=69%, list=25%, signal=52%	MPC1/MGARP/SLC25A4/SFXN2/APOO/GHITM/ETFDH/CHCHD10/AFG3L2/APOOL/HSPA9/CPT1A/SMDT1/MUL1/TIMM17A/COA3/SLC25A3/MPC2/L2HGDH/COQ2/MICU1/IMMT/TMEM70/PINK1/COX11/COX18/TMEM177/SCO1/MTX2/ARMCX3/ABCB10/FIS1/TIMM23/CHCHD3/MCUR1/COX16/MFN2/SFXN4/SFXN1/CCDC51/SAMM50/BNIP3/MICOS10/FUNDC2/MFF/MCU/SPIRE1/FUNDC1/TIMM23B/MICOS13/CHCHD6/ADCK1/SFXN5/TOMM20L/MFN1/BAK1/TOMM20/DNAJC11/UQCC3
GOBP_RESPONSE_TO_XENOBIOTIC_STIMULUS	GOBP_RESPONSE_TO_XENOBIOTIC_STIMULUS	131	0.473662	1.86087	2.23371e-06	9.56123e-05	8.00337e-05	6997	tags=29%, list=12%, signal=25%	CYP2A6/UGT2B15/CYP1A2/SULT2A1/CYP2A7/GSTA3/SULT1C3/AADAC/CYP1A1/CYP3A4/UGT1A4/CES1/CYP2B6/UGT2B28/AKR1C1/CYP3A7/ACSL1/DPEP1/AKR7A3/FMO1/PON3/UGT1A9/ACSM2B/GSTA1/GLYAT/GSTO2/UGT1A7/GSTA5/AOC1/BPHL/CMBL/GSTA2/CYP2C18/CRYZ/CYP2J2/ARNT2/MTARC2/SULT1B1
GOBP_INORGANIC_ANION_TRANSPORT	GOBP_INORGANIC_ANION_TRANSPORT	171	0.425446	1.71737	2.25255e-06	9.56123e-05	8.00337e-05	5471	tags=20%, list=10%, signal=19%	AQP6/BSND/SLC26A7/CLCNKB/CFTR/SLC4A1/SLC4A9/CLCNKA/SLC22A8/SLC12A3/SLC34A1/ANO5/SLC12A1/SLC26A3/SLC22A6/SLC26A4/CASR/CLIC5/SLC13A1/ANO4/CLDN4/SLC22A11/SLC4A5/SLC4A11/GABRA2/SLC34A3/SLC4A4/SLC1A1/CLCN5/SLC17A7/GABRG1/GABRB3/SLC26A9/SLC4A10/SLC39A8
GOBP_NUCLEOSOME_ASSEMBLY	GOBP_NUCLEOSOME_ASSEMBLY	145	0.450114	1.79078	2.2744e-06	9.56123e-05	8.00337e-05	3250	tags=15%, list=6%, signal=14%	TSPY2/TSPY1/H2BW2/H4C6/H1-5/TSPY10/H2BC3/H4C4/H4C2/H3C11/H2BC10/H3C2/H3C7/H4C1/H1-1/H1-4/H3C3/H4C13/H1-3/H4C3/H3C1/H2BC14
GOBP_POSITIVE_REGULATION_OF_STEROID_METABOLIC_PROCESS	GOBP_POSITIVE_REGULATION_OF_STEROID_METABOLIC_PROCESS	29	0.753577	2.26977	2.28652e-06	9.56123e-05	8.00337e-05	2070	tags=24%, list=4%, signal=23%	APOA5/APOA1/APOA2/CGA/CYP7A1/CES1/PPARGC1A
GOBP_PYRUVATE_METABOLIC_PROCESS	GOBP_PYRUVATE_METABOLIC_PROCESS	148	0.45185	1.80141	2.28898e-06	9.56123e-05	8.00337e-05	10599	tags=37%, list=19%, signal=30%	SLC4A1/AGXT/ALDOB/OGDHL/PFKFB2/PPARGC1A/PKLR/FBP1/ESRRB/ENTPD5/PCK1/GPD1/DLD/SLC4A4/BPGM/PDP1/PCK2/PFKM/DLAT/ENO3/PC/PDHA1/LDHB/NR4A3/PDP2/GSTZ1/PDHX/PRKAA2/PDHB/OGDH/HOGA1/ME1/PGAM4/MPC2/GLO1/DHTKD1/PRKAG2/VDAC1/LDHC/RANBP2/HAGH/BSG/SEH1L/PDK2/SDS/PSEN1/PDK4/NUP35/IGF1/PGAM1/PPARA/PGK1/APP/HIF1A/PRKAG1
GOBP_DIGESTION	GOBP_DIGESTION	138	0.457898	1.7759	2.56432e-06	0.000106436	8.90935e-05	6632	tags=33%, list=12%, signal=30%	APOA5/SLC26A7/CHRM1/CRH/APOA1/PGC/SLC9A4/AQP5/CEL/CHIA/CCK/FABP1/GKN1/RBP4/SST/AKR1D1/VIL1/PPARGC1A/PRSS3/TAC1/SLC2A2/SLC5A1/AKR1C1/MUC2/ALPI/CAPN8/CYP39A1/PLS1/HRH2/UCN3/ABCG8/SOX9/ENPP7/LDLR/GUCA2B/PTGER3/EZR/MOGAT2/ACO1/CHRM3/PBLD/AQP1/PTGER1/MGAM/LIMA1/GCNT3
GOBP_REGULATION_OF_CELLULAR_KETONE_METABOLIC_PROCESS	GOBP_REGULATION_OF_CELLULAR_KETONE_METABOLIC_PROCESS	183	0.417337	1.7376	2.68055e-06	0.00011056	9.25458e-05	8584	tags=23%, list=15%, signal=20%	APOA5/APOC3/APOA1/PLA2G3/CYP7A1/FABP1/ABCB11/MIR33A/CES1/PPARGC1A/SLC22A13/AVPR1A/DGAT2/FGF19/PLIN5/RGN/ACMSD/SOX9/PDP1/PRKCE/SLC7A7/CEACAM1/COQ3/ODC1/FABP3/NR4A3/PPARG/INSIG1/PDP2/GSTZ1/CPT1A/PRKAA2/ACADL/BHMT/PRKAG2/RDH10/BMP2/PPTC7/SIRT5/PSME3/BMP5/MLYCD
GOMF_FLAVIN_ADENINE_DINUCLEOTIDE_BINDING	GOMF_FLAVIN_ADENINE_DINUCLEOTIDE_BINDING	81	0.544254	1.96683	2.70666e-06	0.000110939	9.28634e-05	12624	tags=53%, list=22%, signal=41%	LDHD/DAO/NOX5/FMO5/FMO1/ACADM/NOS2/AIFM1/ACADSB/DLD/PRODH/DDO/ETFDH/ACOX2/ETFA/CRY1/CRY2/CHDH/ACADL/ILVBL/IVD/ACOX1/ACAD11/ACAD8/ACADS/AGPS/PRODH2/AOX1/GCDH/NOX4/GSR/TXNRD3/TXNRD2/ACAD10/FOXRED2/NQO2/CYB5R1/FMO4/DHCR24/XDH/SQLE/MMACHC/STEAP4
GOBP_PROTEIN_PROCESSING	GOBP_PROTEIN_PROCESSING	222	0.388543	1.62404	2.88887e-06	0.000117672	9.84992e-05	8811	tags=25%, list=15%, signal=21%	KLK1/F9/TMPRSS2/APOH/CGA/KLK3/CPB2/HJV/F7/F11/TMPRSS4/CPN1/KLK6/CES1/HPR/KLK2/PCSK9/PRSS3/CD5L/ACE2/SPON1/CPXM2/CCBE1/IHH/ATP6AP2/REN/HP/CMA1/LGMN/CYFIP2/CHAC1/KLKB1/MIPEP/FSHB/CLEC3B/PLGRKT/F12/AFG3L2/FXN/TIMM17A/SPCS1/SEC11C/ZMPSTE24/USP17L2/BACE2/PRKACB/SPCS3/SHH/SPCS2/CPD/PRSS12/LPCAT3/PMPCB/CPM/FADD/CTSG
GOCC_MITOCHONDRIAL_LARGE_RIBOSOMAL_SUBUNIT	GOCC_MITOCHONDRIAL_LARGE_RIBOSOMAL_SUBUNIT	57	0.611229	2.13439	3.21184e-06	0.00013002	0.000108835	13747	tags=70%, list=24%, signal=53%	MRPL53/MRPL34/MRPL50/NDUFAB1/MRPL44/MRPL19/MRPL15/MRPL49/MRPL35/MRPS30/MRPL13/MRPL3/MRPS18A/MRPL47/MRPL54/MRPL48/MRPL30/MPV17L2/MRPL42/MRPL45/MRPL41/MRPL39/MALSU1/MRPL4/MRPL16/MRPL32/MRPL21/MRPL22/MRPL14/MRPL11/MRPL12/MRPL58/MRPL33/MRPL27/MRPL43/MRPL36/MRPL28/MRPL57/MRPL52/MRPL20
GOBP_IMPORT_ACROSS_PLASMA_MEMBRANE	GOBP_IMPORT_ACROSS_PLASMA_MEMBRANE	161	0.43191	1.69495	3.46408e-06	0.000139371	0.000116663	5998	tags=24%, list=11%, signal=22%	SLC9A4/SLC24A2/SLC9A2/SLC12A3/HCN2/ATP4B/SLC34A1/KCNJ1/SLC12A1/ATP12A/TRPV5/SLC7A8/KCNJ11/SLC7A3/SLC5A2/SLC1A6/TRPV6/GRM1/SLC5A1/WNK3/ATP4A/ACE2/FAM155B/CLTRN/SLC6A20/ACSL1/LRP2/ATP1A1/SLC27A5/SLC6A13/KCNJ10/SLC15A2/SLC1A1/SLC22A2/SLC39A8/SLC1A2/SLC31A1/HCN4/SLC12A2
GOBP_ORGANELLE_DISASSEMBLY	GOBP_ORGANELLE_DISASSEMBLY	107	0.490465	1.83981	3.49784e-06	0.000139657	0.000116902	13557	tags=47%, list=24%, signal=36%	PLK5/CTSK/PPARGC1A/GABARAPL1/RETREG1/FZD5/GABARAPL3/CISD2/MUL1/GFM2/GABARAPL2/TEX264/SPATA18/PINK1/VDAC1/KIF9/FBXO7/VPS13D/FIS1/MAP1LC3B/ATG5/MFN2/KIF5B/WIPI1/UFL1/MAP1LC3A/UBA5/HIF1A/ATG3/SREBF2/BNIP3/SQSTM1/FUNDC2/STX5/ZFAND1/UFM1/FUNDC1/WIPI2/DNM1L/PELO/GBA/VCP/RB1CC1/WDR45B/SPAST/VRK1/DYRK3/DDRGK1/ATG9A/HK2
GOMF_ATPASE_ACTIVITY_COUPLED_TO_TRANSMEMBRANE_MOVEMENT_OF_IONS_ROTATIONAL_MECHANISM	GOMF_ATPASE_ACTIVITY_COUPLED_TO_TRANSMEMBRANE_MOVEMENT_OF_IONS_ROTATIONAL_MECHANISM	22	0.802801	2.28485	3.51379e-06	0.000139657	0.000116902	6670	tags=55%, list=12%, signal=48%	ATP6V1G3/ATP6V0A4/ATP6V0D2/ATP6V1C2/ATP6V1A/ATP6V1D/ATP5F1B/ATP6V0B/ATP6V1H/ATP6V0D1/ATP6V1E1/ATP6V0E2
GOBP_CELLULAR_ALDEHYDE_METABOLIC_PROCESS	GOBP_CELLULAR_ALDEHYDE_METABOLIC_PROCESS	62	0.599903	2.10123	3.61822e-06	0.000142942	0.000119651	11870	tags=58%, list=21%, signal=46%	ADH4/AGXT/ALDOB/ALDH8A1/ALDH1A2/AKR1C1/AGXT2/AKR7A3/KHK/RDH11/ALDH4A1/GOT2/HOGA1/GRHPR/ADH5/ALDH9A1/GLO1/IDH2/PRODH2/RDH10/BMP2/BCO1/PNPO/HAGH/AKR7A2/BMP5/ALDH7A1/BCO2/ALDH3A2/ALDH1A1/REST/PDXP/ALDH1A3/DHRS13/ESD/CYP1B1
GOBP_RETINOL_METABOLIC_PROCESS	GOBP_RETINOL_METABOLIC_PROCESS	47	0.644135	2.13426	3.64832e-06	0.000143268	0.000119924	4751	tags=34%, list=8%, signal=31%	ADH4/ADH1A/ADH1C/CYP1A2/TTR/CYP1A1/CYP3A4/RDH12/RBP4/ADH6/RDH16/ALDH1A2/CYP3A7/DGAT2/RDH11/ADH1B
GOCC_CLUSTER_OF_ACTIN_BASED_CELL_PROJECTIONS	GOCC_CLUSTER_OF_ACTIN_BASED_CELL_PROJECTIONS	156	0.434033	1.69162	3.75178e-06	0.000146453	0.000122591	7007	tags=26%, list=12%, signal=23%	ATP6V0A4/PVALB/CALB1/SLC34A1/SLC6A18/SLC26A3/ITLN1/VIL1/SLC26A4/SLC22A12/MYO7B/SLC2A2/SLC5A1/SLC6A19/MYH14/MYO3B/TSPEAR/PTH1R/ADGRV1/ACE2/ANKS4B/LRP2/PLS1/SLC7A9/CA4/SLC34A3/CUBN/PDZK1/CIB2/CDHR2/EZR/AMN/DCXR/ESPN/AQP1/SLC27A4/CAPZA2/LIMA1/MKKS/EPS8/ABCG2
GOBP_REGULATION_OF_STEROL_TRANSPORT	GOBP_REGULATION_OF_STEROL_TRANSPORT	66	0.574841	2.05695	4.17555e-06	0.000162031	0.000135631	3597	tags=18%, list=6%, signal=17%	APOA5/APOC3/APOA1/APOA2/PON1/MIR130B/EGF/MIR33A/CES1/PCSK9/TTC39B/ABCA8
GOBP_SECONDARY_METABOLIC_PROCESS	GOBP_SECONDARY_METABOLIC_PROCESS	56	0.610323	2.13187	4.30164e-06	0.000165942	0.000138904	4776	tags=30%, list=8%, signal=28%	CYP2A6/CYP1A2/CYP2A7/PMEL/TYR/AKR1C4/CYP1A1/TYRP1/SLC45A2/DDC/AKR1C1/TH/DDT/AKR7A3/FMO1/PON3/ACMSD
GOBP_GLYCEROLIPID_BIOSYNTHETIC_PROCESS	GOBP_GLYCEROLIPID_BIOSYNTHETIC_PROCESS	263	0.363375	1.56261	4.46135e-06	0.00017104	0.000143172	10314	tags=30%, list=18%, signal=24%	INPP5J/APOA1/APOA2/PIK3C2G/CWH43/THRSP/ETNPPL/PLCG2/CPNE6/GPAT3/GPD1L/LIPH/CDS1/ALPI/PIP5K1B/HTR2C/ACSL1/DGAT2/GK/PCK1/SLC44A4/ABHD3/PLIN5/GPD1/RGN/SACM1L/ETNK2/LDLR/PCK2/FITM2/MOGAT2/FABP3/CHPT1/PIGH/ACSL3/SELENOI/PGAP4/PIGW/ABHD5/PIP4K2C/PTPMT1/MTM1/PLA2G12A/MTMR6/PCYT2/PIGO/STARD7/STARD10/RAB14/ACSL4/PIK3R4/PLA2G4A/SLC44A3/PIK3C2A/ETNK1/LPCAT3/AGPAT3/GPAM/AGMO/PLEKHA3/MOGAT1/PIGA/PI4K2B/SH3YL1…
GOCC_PLATELET_ALPHA_GRANULE_LUMEN	GOCC_PLATELET_ALPHA_GRANULE_LUMEN	67	0.571459	2.05022	4.48595e-06	0.00017104	0.000143172	1836	tags=12%, list=3%, signal=12%	HRG/ALB/KNG1/ORM2/AHSG/ORM1/EGF/PLG
GOBP_PHENOL_CONTAINING_COMPOUND_METABOLIC_PROCESS	GOBP_PHENOL_CONTAINING_COMPOUND_METABOLIC_PROCESS	106	0.489264	1.83694	4.64259e-06	0.000175989	0.000147314	4721	tags=25%, list=8%, signal=23%	SULT2A1/CGA/PMEL/DIO1/TYR/PAH/TACR3/SNCB/INSM1/CTSK/TYRP1/IYD/RTL4/DUOX2/PNMT/DAO/DUOXA2/SLC45A2/DDC/CRYM/TH/DDT/RNF180/DUOXA1/HAND2/SLC16A10
GOCC_RECYCLING_ENDOSOME	GOCC_RECYCLING_ENDOSOME	189	0.399044	1.6484	4.68382e-06	0.000176531	0.000147768	12470	tags=38%, list=22%, signal=30%	SLC26A7/CFTR/PLA2G3/AQP2/RAB25/ABCB11/TBC1D14/C1orf210/MYO5B/ZDHHC2/PLEKHB2/ABHD17C/SLC1A1/ATP9A/PDLIM4/ANK2/SORL1/SLC31A1/SCAMP1/RAB11FIP2/RAB11FIP4/PACSIN2/VAMP8/RAB11FIP5/ABHD17B/PLEKHJ1/RAB17/SCAMP5/RAB29/ACKR2/ARFGEF2/CLCN4/RNF11/BOK/HLA-G/VTI1B/RAB14/AP1G1/FZD7/RAB11FIP1/CLCN3/GPER1/RAB11A/B2M/RAB10/TFRC/ACKR4/SLC30A10/ARF6/TMEM230/ATP11A/SGK3/TNIK/APP/COMMD1/ATP11B/STX7/BAIAP3/RAB4A/EHD1/V…
GOBP_VASCULAR_PROCESS_IN_CIRCULATORY_SYSTEM	GOBP_VASCULAR_PROCESS_IN_CIRCULATORY_SYSTEM	242	0.380275	1.58089	4.75656e-06	0.000177876	0.000148894	9456	tags=31%, list=17%, signal=26%	CALCA/KNG1/SLC38A3/SH3GL2/SLC22A8/ADRB1/SLC16A7/CPS1/SLC7A8/CASR/SLC7A3/UTS2R/SLC6A4/OCLN/SLIT2/TJP3/AVPR1A/SLC2A4/SLC5A1/ACE2/KCNMB2/SLC6A20/SLC29A2/LRP2/SLC6A13/HRH2/KCNMA1/SLC15A2/SLC4A4/SLC1A1/DDAH1/SLC22A2/SMTNL2/F2RL1/AGTR1/SLC1A2/CEACAM1/ANGPT1/ABCC4/EDNRB/SLC12A2/C2CD4A/SLC13A3/CHRM3/SLC2A13/SLC16A12/SLC27A4/MKKS/FOXC1/ABCG2/SCPEP1/YES1/GCLC/AVPR1B/ATP8A1/LEP/AGTR2/ZDHHC21/PTPRJ/SLC22A1/T…
GOBP_CELL_CELL_JUNCTION_ORGANIZATION	GOBP_CELL_CELL_JUNCTION_ORGANIZATION	207	0.390792	1.59088	4.77373e-06	0.000177876	0.000148894	9138	tags=26%, list=16%, signal=22%	CLDN8/CD177/CDH12/CDH17/CLDN6/GRHL2/CDH7/CDH20/MARVELD2/OCLN/MPP7/TJP3/CLDN19/WNT11/CDH19/UGT8/CLDN4/DSG2/GJB6/ACE2/GJB1/CLDN16/CDH1/NECTIN3/MARVELD3/CD9/POF1B/CLDN7/GRHL1/CLDN10/DSP/FZD5/F2RL1/MPP5/RDX/CLDN3/CLDN23/CRB3/PARD6A/EPHA4/TRPV4/FRMPD2/PLEKHA7/CLDN34/EPHA2/PDCD6IP/AGT/CLDN14/PRKCI/CDH3/TLN2/SRF/PATJ
GOBP_CARBOHYDRATE_HOMEOSTASIS	GOBP_CARBOHYDRATE_HOMEOSTASIS	229	0.380893	1.56784	4.91122e-06	0.000180541	0.000151125	7231	tags=21%, list=13%, signal=18%	MIR15A/GCGR/CFTR/CRH/EPHA5/CYP7A1/STXBP5L/CPB2/MTNR1B/OXCT1/FAM3B/RBP4/MIR33A/CASR/PDX1/KCNJ11/FOXA3/PPARGC1A/MIR103A1/SLC2A4/GRIK5/G6PC/TFAP2B/TH/GJB6/SSTR5/CLTRN/VSNL1/PCK1/SUCNR1/CMA1/PCK2/PRKCE/ENDOG/PPARG/SELENOT/KLF15/CRY1/RAB11FIP2/GPR27/CRY2/PRKAA2/ADGRF5/CCDC186/RAB11FIP5/PRCP/FOXO1/MPC2
GOMF_OXIDOREDUCTASE_ACTIVITY_ACTING_ON_THE_ALDEHYDE_OR_OXO_GROUP_OF_DONORS	GOMF_OXIDOREDUCTASE_ACTIVITY_ACTING_ON_THE_ALDEHYDE_OR_OXO_GROUP_OF_DONORS	44	0.656032	2.17806	4.91437e-06	0.000180541	0.000151125	11248	tags=70%, list=20%, signal=57%	ADH4/AKR1C4/OGDHL/ALDH1B1/ALDH8A1/ALDH1A2/FMO5/BCKDHB/ALDH6A1/ALDH5A1/ALDH1L1/ALDH4A1/DLD/HSD17B12/DLAT/PDHA1/PDHX/PDHB/OGDH/ADH5/ALDH9A1/AKR1B1/DHTKD1/AOX1/ALDH7A1/ALDH3A2/FAR2/ALDH1A1/ALDH2/ALDH1A3/FAR1
GOBP_PEPTIDE_HORMONE_SECRETION	GOBP_PEPTIDE_HORMONE_SECRETION	244	0.361958	1.51449	4.92786e-06	0.000180541	0.000151125	6411	tags=20%, list=11%, signal=18%	NR0B2/NKX6-1/CFTR/CRH/EPHA5/STXBP5L/MTNR1B/ADCYAP1/OXCT1/FAM3B/MAFA/MYRIP/RBP4/PFKFB2/CASR/PDX1/KCNJ11/ACVR1C/SYT9/CRHBP/SFRP1/SLC25A5/SLC2A2/TFAP2B/ILDR1/SLC25A4/SSTR5/HTR2C/CLTRN/DPP4/VSNL1/NOS2/CACNA1D/SLC16A10/UCN3/ILDR2/SYT7/PCK2/ITPR2/HADH/PRKCE/SELENOT/KCNC2/RAB11FIP2/GLUD1/GPR27/CPT1A/GAL
GOBP_ORGANOPHOSPHATE_CATABOLIC_PROCESS	GOBP_ORGANOPHOSPHATE_CATABOLIC_PROCESS	153	0.42797	1.68231	5.23937e-06	0.000190888	0.000159786	10994	tags=34%, list=19%, signal=27%	PLA2G4F/INPP5J/APOA2/PON1/PLCG2/GDA/ACAT1/GPD1L/ENTPD5/IMPA2/ANGPTL3/NUDT12/GPD1/PNPLA8/ENPP7/NUDT4B/LDLR/ENTPD8/HPRT1/FITM2/ENPP1/ABHD6/SMPD1/NUDT9/DCTPP1/GDE1/UPP1/PRKCD/UPB1/NAPEPLD/LIPC/PNP/NUDT7/PLA2G4A/NUDT4/MLYCD/AMPD3/SMPDL3A/BPNT1/BPNT2/ENTPD2/IMPA1/DNPH1/NT5C1B/PDE7B/ENPP6/INPP1/PDE4D/HINT1/DUT/NUDT15/PDXP
GOBP_ZYMOGEN_ACTIVATION	GOBP_ZYMOGEN_ACTIVATION	57	0.599241	2.09253	5.27404e-06	0.000191089	0.000159954	6190	tags=30%, list=11%, signal=27%	KLK1/F9/APOH/KLK3/CPB2/F11/HPR/KLK2/PRSS3/CD5L/HP/LGMN/CYFIP2/KLKB1/CLEC3B/PLGRKT/F12
GOBP_ACETYL_COA_METABOLIC_PROCESS	GOBP_ACETYL_COA_METABOLIC_PROCESS	38	0.67516	2.10894	5.38456e-06	0.000194022	0.000162409	11050	tags=61%, list=19%, signal=49%	ACOT12/HMGCS2/ACAT1/DLD/PDP1/DLAT/PDHA1/PDP2/GSTZ1/PDHX/HMGCS1/PDHB/MPC2/DLST/NUDT7/ACSS1/MLYCD/PDK2/KYNU/PDK4/AADAT/PPCS/ACLY
GOBP_NUCLEOSIDE_BISPHOSPHATE_BIOSYNTHETIC_PROCESS	GOBP_NUCLEOSIDE_BISPHOSPHATE_BIOSYNTHETIC_PROCESS	67	0.565819	2.02998	5.51742e-06	0.000197723	0.000165507	12901	tags=55%, list=23%, signal=43%	ACAT1/ELOVL4/PANK1/ACSL1/SCD5/ACSL6/ACSBG1/DLD/ELOVL7/PDP1/HSD17B12/HSD17B8/DLAT/PDHA1/ACSL3/PDP2/GSTZ1/PDHX/PDHB/MPC2/CBR4/HACD2/ACSL4/ACSS1/MLYCD/PANK3/PDK2/PDK4/GCDH/PPCS/SLC26A1/ACLY/ACOT7/ACSS2/SLC35B2/ELOVL6/SLC35B3
GOBP_BLOOD_COAGULATION_INTRINSIC_PATHWAY	GOBP_BLOOD_COAGULATION_INTRINSIC_PATHWAY	17	0.85335	2.28857	5.78839e-06	0.000206306	0.000172691	1204	tags=29%, list=2%, signal=29%	SERPINC1/KNG1/F9/APOH/F11
GOMF_OXIDOREDUCTASE_ACTIVITY_ACTING_ON_PAIRED_DONORS_WITH_INCORPORATION_OR_REDUCTION_OF_MOLECULAR_OXYGEN	GOMF_OXIDOREDUCTASE_ACTIVITY_ACTING_ON_PAIRED_DONORS_WITH_INCORPORATION_OR_REDUCTION_OF_MOLECULAR_OXYGEN	160	0.429226	1.68302	5.94968e-06	0.000210908	0.000176544	4383	tags=18%, list=8%, signal=16%	CYP2A6/CYP17A1/CYP1A2/CYP2A7/CYP7A1/TYR/AKR1C4/PAH/CYP1A1/CYP3A4/TYRP1/AKR1D1/CYP11A1/CYP2B6/CYP4A22/CYP4A11/SC5D/AKR1C1/TH/CYP4F2/PHYH/CYP39A1/FMO5/CYP3A7/BBOX1/SCD5/FMO1/NOS2
GOBP_POLYOL_METABOLIC_PROCESS	GOBP_POLYOL_METABOLIC_PROCESS	130	0.450608	1.73908	6.00735e-06	0.000211808	0.000177297	12448	tags=54%, list=22%, signal=42%	INPP5J/SLC34A1/CYP3A4/PLCG2/LHCGR/PLCZ1/MIOX/GOT1/PTH1R/DGAT2/GK/IMPA2/ANGPTL3/SORD/ASAH1/PCK1/SGPP1/QDPR/NUDT4B/PCK2/DEGS2/SPTLC3/COQ3/MOGAT2/PLPP3/PCBD1/PLCH2/IP6K3/IPPK/COQ2/AVPR1B/PTS/AKR1B1/LEP/CYP27A1/SPTLC2/PLA2G4A/NUDT4/MINPP1/SPR/PGP/MOGAT1/GPER1/PLPP1/BPNT1/PLCB4/BPNT2/PLCD4/SPTLC1/GPD2/IMPA1/ITPK1/SGPP2/SLC5A3/DHFRP1/GCH1/INPP1/PDXP/SNCA/GK5/INPP4B/DHFR/ASAH2B/NTSR1/PPIP5K1/CALM1/IP6K1…
GOBP_REGULATION_OF_MACROAUTOPHAGY	GOBP_REGULATION_OF_MACROAUTOPHAGY	160	0.428667	1.68083	6.28725e-06	0.000220491	0.000184565	12193	tags=39%, list=21%, signal=31%	ATP6V0D2/ATP6V1B1/ATP6V1C2/ATP6V1A/RRAGD/SCOC/ATP6V1D/ATP6V0B/ATP6V1H/EPM2A/PRKAA2/ATP6V0D1/ATP6V1E1/ATP6V0E2/LAMTOR3/PIP4K2C/PRKAB1/MTM1/PRKAG2/SESN3/ATP6V1G1/ATG101/PINK1/VDAC1/SPTLC2/ADRB2/ATP6V1C1/UBQLN1/VPS13D/VPS26A/ATP6V0E1/EXOC8/FYCO1/SPTLC1/LAMTOR1/RRAGA/LAMTOR5/RHEB/BAG3/PAFAH1B2/RALB/TRIM13/PIK3CA/HIF1A/VPS35/SCFD1/PRKAG1/MAPK8/BNIP3/POLDIP2/PRKAA1/PHF23/SNX6/FEZ2/ATP6V1B2/SNX5/RRAGC/A…
GOBP_REGULATION_OF_LIPID_LOCALIZATION	GOBP_REGULATION_OF_LIPID_LOCALIZATION	183	0.406562	1.69273	6.81921e-06	0.000237874	0.000199116	9648	tags=33%, list=17%, signal=27%	APOA5/APOC3/CRH/APOA1/APOA2/PON1/PLA2G3/MIR130B/CCK/EGF/VSTM2A/MIR33A/CES1/CYP4A11/PCSK9/AVPR1A/TAC1/CYP4F2/TTC39B/ABCA8/ACSL1/GALR1/PLIN5/REN/ABCG8/ENPP7/AGTR1/FITM2/MIR27B/SLC12A2/FABP3/PPARG/CRY1/GAL/ABHD5/PLIN2/STXBP1/NAXE/PRKCD/AVPR1B/ATP8A1/SCP2/LEP/AGTR2/SHH/PLA2G4A/OSBPL8/LPCAT3/MIR33B/CD36/AGT/MIR301B/FIS1/NUS1/LAMTOR1/TMEM30A/PSEN1/CETP/ARV1/ASXL2
GOBP_GLUTAMINE_FAMILY_AMINO_ACID_METABOLIC_PROCESS	GOBP_GLUTAMINE_FAMILY_AMINO_ACID_METABOLIC_PROCESS	74	0.548753	2.02253	6.96866e-06	0.000241802	0.000202404	9271	tags=49%, list=16%, signal=41%	TAT/OTC/ARG1/CPS1/HAL/DAO/GOT1/ALDH5A1/NOS2/ARG2/GLYATL1/ALDH4A1/AMDHD1/DDAH1/AGMAT/ASRGL1/GOT2/PRODH/SLC39A8/SLC7A7/PHGDH/GLUD1/OAT/GLUD2/GCLC/CTPS1/PRODH2/GFPT1/MTHFS/SLC25A12/DGLUCY/GLS/ASNSD1/NAGS/GCLM/FTCD
GOBP_GLYCEROLIPID_CATABOLIC_PROCESS	GOBP_GLYCEROLIPID_CATABOLIC_PROCESS	73	0.548749	2.02127	7.25454e-06	0.000250396	0.000209598	6067	tags=23%, list=11%, signal=21%	PLA2G4F/APOA5/APOC3/APOA1/APOA2/AADAC/CPS1/FABP1/LIPH/PLIN5/ABHD2/PNPLA8/LDLR/PNPLA4/SORL1/ABHD6/FABP3
GOBP_CHOLESTEROL_EFFLUX	GOBP_CHOLESTEROL_EFFLUX	61	0.593134	2.08807	7.29879e-06	0.000250604	0.000209772	3982	tags=20%, list=7%, signal=18%	APOA5/APOC3/APOA1/APOA2/PON1/MIR130B/EGF/MIR33A/CES1/TTC39B/ABCA8/APOM
GOBP_LIPID_HOMEOSTASIS	GOBP_LIPID_HOMEOSTASIS	159	0.43043	1.68682	7.50605e-06	0.000255823	0.000214141	9748	tags=36%, list=17%, signal=30%	APOA5/APOC3/APOA1/APOA2/CYP7A1/ABCB11/MIR33A/CES1/PCSK9/G6PC/AKR1C1/GOT1/TTC39B/MIR208A/CYP39A1/DGAT2/APOM/ANGPTL3/PNPLA8/ABCG8/ENPP7/LDLR/PNPLA4/FITM2/ACOX2/MIR27B/FABP3/PPARG/INSIG1/NR1D2/PRKAA2/LIMA1/RTN4/EPHX2/ABHD5/ACOX1/CYP7B1/ACSM2A/LIPC/TLCD3A/CLN8/MTTP/GPAM/MIR33B/PLA2G12B/DDX3X/LRP5/NUS1/FABP4/LAMTOR1/CERT1/MALRD1/XBP1/CETP/CD24/TLCD4/ORMDL2
GOBP_PROTEIN_LOCALIZATION_TO_MITOCHONDRION	GOBP_PROTEIN_LOCALIZATION_TO_MITOCHONDRION	145	0.435768	1.7337	7.55674e-06	0.000255823	0.000214141	13949	tags=52%, list=25%, signal=39%	MGARP/AIFM1/FZD5/MAIP1/TIMM10B/MIPEP/MTCH2/HSP90AA1/HSPA4/DNAJA1/TIMM17A/HSPD1/RNF186/PMAIP1/TIMM8B/MARCHF5/TIMM10/PINK1/SFN/MOAP1/FBXO7/COX18/DNAJC19/MAPT/CHCHD4/UBE2D3/PMPCB/GRPEL1/TIMM21/RHOU/FIS1/TIMM23/TOMM70/BCL2/MFN2/BAG3/TOMM34/UBL5/SAMM50/MAPK8/SREBF2/PMPCA/TOMM22/YWHAB/PRKAA1/AP3B1/MFF/TOMM40L/TFDP2/IMMP2L/LEPROT/TP73/YWHAE/TIMM23B/BAG4/DNAJC15/IMMP1L/LRRK2/TIMM13/DNM1L/YWHAQ/DDIT3/TIMM…
GOBP_CARBOHYDRATE_CATABOLIC_PROCESS	GOBP_CARBOHYDRATE_CATABOLIC_PROCESS	195	0.397871	1.64193	7.5678e-06	0.000255823	0.000214141	14503	tags=49%, list=26%, signal=36%	SLC4A1/ALDOB/CHIA/OGDHL/PFKFB2/NEU4/PPARGC1A/TREH/PKLR/G6PC/MIOX/FBP1/DHDH/ESRRB/GBA3/ENTPD5/GK/SORD/FUT6/KHK/GPD1/SLC4A4/FUT9/BPGM/PHKA1/PFKM/ENO3/ABHD10/PRKAA2/AGL/MGAM/IDNK/OGDH/GLB1/FUT1/PGAM4/DHTKD1/PRKAG2/XYLB/RANBP2/SLC25A12/PPP1CB/PHKB/LRP5/SEH1L/PSEN1/GPD2/NUP35/IGF1/RPE/PGAM1/NEU1/HEXB/PPARA/ALDH1A1/PGK1/APP/HIF1A/PRKAG1/PRKAA1/GK5/CTBS/PYGB/GALM/NUP58/PGM2/FUT10/NUP160/CALM1/DERA/NUP98…
GOBP_RDNA_HETEROCHROMATIN_ASSEMBLY	GOBP_RDNA_HETEROCHROMATIN_ASSEMBLY	39	0.666046	2.10065	7.68126e-06	0.000258327	0.000216236	3116	tags=28%, list=5%, signal=27%	H4C6/H4C4/H4C2/H3C11/H3C2/H3C7/H4C1/H3C3/H4C13/H4C3/H3C1
GOBP_NEGATIVE_REGULATION_OF_WOUND_HEALING	GOBP_NEGATIVE_REGULATION_OF_WOUND_HEALING	73	0.545825	2.0105	8.47207e-06	0.000283469	0.000237282	6372	tags=25%, list=11%, signal=22%	HRG/KNG1/APOH/VTN/CPB2/F11/PROC/PLG/CLDN19/MIR200B/CD9/AJAP1/KLKB1/ADTRP/CEACAM1/SLC12A2/F12/CLDN3
GOBP_REGULATION_OF_PEPTIDE_HORMONE_SECRETION	GOBP_REGULATION_OF_PEPTIDE_HORMONE_SECRETION	207	0.383319	1.56046	8.58995e-06	0.000285954	0.000239362	6368	tags=20%, list=11%, signal=18%	NR0B2/NKX6-1/CFTR/CRH/EPHA5/STXBP5L/MTNR1B/ADCYAP1/OXCT1/MYRIP/RBP4/PFKFB2/CASR/PDX1/KCNJ11/ACVR1C/SYT9/CRHBP/SFRP1/SLC25A5/SLC2A2/TFAP2B/ILDR1/SLC25A4/SSTR5/HTR2C/CLTRN/DPP4/VSNL1/NOS2/CACNA1D/UCN3/SYT7/PCK2/ITPR2/HADH/PRKCE/SELENOT/KCNC2/GLUD1/GPR27/CPT1A
GOBP_ALCOHOL_CATABOLIC_PROCESS	GOBP_ALCOHOL_CATABOLIC_PROCESS	55	0.606717	2.09861	9.58257e-06	0.000317386	0.000265673	4168	tags=24%, list=7%, signal=22%	ADH4/INPP5J/SULT2A1/CYP7A1/CEL/HAO1/AKR1D1/ALDH1B1/MIOX/CYP39A1/GK/IMPA2/SORD
GOCC_PROTEIN_LIPID_COMPLEX	GOCC_PROTEIN_LIPID_COMPLEX	39	0.663138	2.09148	9.72049e-06	0.000320337	0.000268143	5166	tags=33%, list=9%, signal=30%	APOA5/APOC3/APOA1/APOA2/APOH/APOF/PON1/HPR/LPA/APOM/APOO/LDLR/PEX3
GOCC_ANCHORED_COMPONENT_OF_MEMBRANE	GOCC_ANCHORED_COMPONENT_OF_MEMBRANE	169	0.407352	1.62319	9.92274e-06	0.000325367	0.000272353	4433	tags=17%, list=8%, signal=15%	RHBG/OMG/LYPD6B/PSCA/CNTN3/HJV/CD177/UMOD/CEACAM7/ALPG/LSAMP/PRMT8/FOLR3/XPNPEP2/CNTN6/ITLN1/LY6L/VNN1/GFRA4/GPC3/MSLN/TREH/CNTFR/ALPI/GPHN/DPEP1/CA4/SVIP
GOMF_OXIDOREDUCTASE_ACTIVITY_ACTING_ON_THE_ALDEHYDE_OR_OXO_GROUP_OF_DONORS_NAD_OR_NADP_AS_ACCEPTOR	GOMF_OXIDOREDUCTASE_ACTIVITY_ACTING_ON_THE_ALDEHYDE_OR_OXO_GROUP_OF_DONORS_NAD_OR_NADP_AS_ACCEPTOR	36	0.672801	2.08488	1.02406e-05	0.00033412	0.00027968	11248	tags=69%, list=20%, signal=56%	ADH4/AKR1C4/ALDH1B1/ALDH8A1/ALDH1A2/ALDH6A1/ALDH5A1/ALDH1L1/ALDH4A1/DLD/HSD17B12/DLAT/PDHA1/PDHX/PDHB/ADH5/ALDH9A1/AKR1B1/ALDH7A1/ALDH3A2/FAR2/ALDH1A1/ALDH2/ALDH1A3/FAR1
GOBP_ENDOTHELIAL_CELL_MIGRATION	GOBP_ENDOTHELIAL_CELL_MIGRATION	258	0.347571	1.49443	1.03513e-05	0.000336058	0.000281302	7738	tags=18%, list=14%, signal=15%	HRG/MIR15A/APOA1/APOH/MIR188/MIR200C/EGF/FGFBP1/MIR494/MIR329-1/SLIT2/MIR505/PRSS3/MIR200A/S100A2/MIR200B/CCBE1/ATP5F1A/DPP4/MIR640/MIR221/ANXA3/ATP5F1B/LGMN/DNAJA4/KLF4/MIR29A/ADTRP/CEACAM1/ANGPT1/MIR361/SYNJ2BP/FGF1/MIR2355/MIR27B/PPARG/PLPP3/PRCP/FUT1/PDCD10/S100P/MIR30A/NR4A1/AGTR2/AMOT/RHOB
GOBP_PHOSPHOLIPID_EFFLUX	GOBP_PHOSPHOLIPID_EFFLUX	13	0.880324	2.23367	1.07168e-05	0.000346212	0.000289802	337	tags=31%, list=1%, signal=31%	APOA5/APOC3/APOA1/APOA2
GOBP_RIBOSE_PHOSPHATE_BIOSYNTHETIC_PROCESS	GOBP_RIBOSE_PHOSPHATE_BIOSYNTHETIC_PROCESS	194	0.382701	1.58973	1.12797e-05	0.000362608	0.000303527	12916	tags=49%, list=23%, signal=38%	AK5/PPARGC1A/ACAT1/ATP6V1A/PKLR/MTCO2P12/ELOVL4/PANK1/ATP5F1A/ACSL1/SCD5/ACSL6/ACSBG1/RFK/DLD/ATP5MC3/ELOVL7/ATP5MG/ATP5F1B/HPRT1/PDP1/HSD17B12/AK3/HSD17B8/DLAT/ATP5ME/PDHA1/ACSL3/PDP2/GSTZ1/PDHX/PDHB/UPP1/ATP5PF/ATP5PB/ADK/DMAC2L/MPC2/CBR4/CTPS1/ADCY1/PRKAG2/SLC25A13/ATPSCKMT/PINK1/HACD2/ATP5MC1/ATP5PO/ACSL4/LDHC/ACSS1/SLC25A12/MLYCD/NME5/AMPD3/ATP5F1C/PANK3/ADCY5/PDK2/PRPSAP2/ADSS2/PDK4/STOML2/…
GOBP_NUCLEOSOME_ORGANIZATION	GOBP_NUCLEOSOME_ORGANIZATION	183	0.40119	1.67037	1.14341e-05	0.00036578	0.000306182	3250	tags=12%, list=6%, signal=11%	TSPY2/TSPY1/H2BW2/H4C6/H1-5/TSPY10/H2BC3/H4C4/H4C2/H3C11/H2BC10/H3C2/H3C7/H4C1/H1-1/H1-4/H3C3/H4C13/H1-3/H4C3/H3C1/H2BC14
GOBP_ORGANIC_HYDROXY_COMPOUND_CATABOLIC_PROCESS	GOBP_ORGANIC_HYDROXY_COMPOUND_CATABOLIC_PROCESS	77	0.526256	1.90968	1.1594e-05	0.000369095	0.000308957	4168	tags=22%, list=7%, signal=20%	ADH4/INPP5J/SULT2A1/CYP7A1/CEL/HAO1/HSD17B6/AKR1D1/LDHD/CYP4A11/ALDH1B1/MIOX/CYP4F2/CYP39A1/GK/IMPA2/SORD
GOBP_NEUTRAL_LIPID_CATABOLIC_PROCESS	GOBP_NEUTRAL_LIPID_CATABOLIC_PROCESS	47	0.625137	2.07131	1.18057e-05	0.000372809	0.000312066	6067	tags=30%, list=11%, signal=27%	APOA5/APOC3/APOA1/APOA2/AADAC/CPS1/FABP1/LIPH/PLIN5/ABHD2/PNPLA4/SORL1/ABHD6/FABP3
GOMF_LIGASE_ACTIVITY	GOMF_LIGASE_ACTIVITY	163	0.41727	1.63866	1.18244e-05	0.000372809	0.000312066	14532	tags=53%, list=26%, signal=40%	CPS1/ATP6V1A/ACSS3/SLC27A2/TTLL2/ATP5F1A/ACSL1/MARS2/ACSL6/PCCA/PCCB/SUCLG1/SLC27A5/LARS2/ACSBG1/ACSM2B/ATP5MG/ATP5F1B/SUCLA2/DPH6/PC/ATP5ME/ACSL3/SLC27A4/SUCLG2/ATP5PF/ATP5PB/NARS1/GCLC/NARS2/CTPS1/MCCC2/ACSM2A/EARS2/ATP5PO/MTHFS/ACSL4/MCCC1/ACSS1/QRSL1/ASNSD1/ATP5F1C/LIG4/RTCB/GCLM/DARS2/ADSS2/GATB/PARS2/RIMKLA/ATP5PD/PPCS/UBA5/ACSM3/UBA3/ACSM5/FARS2/GMPS/ACSF2/ATP5F1E/FARSB/TARS1/WARS2/IARS2/M…
GOBP_IMPORT_INTO_CELL	GOBP_IMPORT_INTO_CELL	230	0.368803	1.53313	1.20259e-05	0.000376359	0.000315037	6555	tags=23%, list=12%, signal=20%	SLC9A4/SLC24A2/SLC6A2/SLC9A2/SLC12A3/HCN2/ATP4B/SLC34A1/KCNJ1/SLC18A2/SLC12A1/ATP12A/TRPV5/SLC7A8/KCNJ11/SLC7A3/SLC6A4/SLC5A2/SLC1A6/TRPV6/GRM1/NOX5/SLC5A1/WNK3/ATP4A/SLC27A2/ACE2/FAM155B/CLTRN/SLC6A20/ACSL1/SLC29A2/ARC/LRP2/ATP1A1/SLC27A5/SPX/SLC6A13/KCNJ10/SLC15A2/SLC1A1/SLC22A2/SLC39A8/SLC1A2/SLC31A1/HCN4/SLC12A2/FABP3/ACSL3/SLC27A4/SLC47A1/KCNJ15
GOMF_MONOOXYGENASE_ACTIVITY	GOMF_MONOOXYGENASE_ACTIVITY	101	0.484735	1.83114	1.20518e-05	0.000376359	0.000315037	4383	tags=24%, list=8%, signal=22%	CYP2A6/CYP17A1/CYP1A2/CYP2A7/CYP7A1/TYR/AKR1C4/PAH/CYP1A1/CYP3A4/TYRP1/AKR1D1/CYP11A1/CYP2B6/CYP4A22/CYP4A11/AKR1C1/TH/CYP4F2/CYP39A1/FMO5/CYP3A7/FMO1/NOS2
GOMF_HEAT_SHOCK_PROTEIN_BINDING	GOMF_HEAT_SHOCK_PROTEIN_BINDING	123	0.450883	1.73921	1.25063e-05	0.000388225	0.00032497	14218	tags=46%, list=25%, signal=35%	APOA1/APOA2/PACRG/METTL21C/CYP1A1/KCNJ11/DNAJB9/BAG1/DNAJA4/GPR37/FGF1/CDC37L1/SLC12A2/DNAJA1/HSPA9/HSPA8/TFAM/ST13P4/DNAJB14/FICD/HSPA13/BAG5/DNAJA2/DNAJB1/CYP2E1/MAPT/EIF2AK3/ST13P5/HSPA2/HSPA5/BAG3/ST13/TOMM34/PPID/HIF1A/DNAJA3/STUB1/PDXP/SNCA/GBP1/BAG4/KDR/HDAC2/PTGES3/BAG2/ARNTL/AHSA1/STIP1/USP19/METTL21A/BCOR/BAK1/HSPA1L/CHORDC1/AHR/CSNK2A1/DNAJC10
GOMF_PEPTIDASE_REGULATOR_ACTIVITY	GOMF_PEPTIDASE_REGULATOR_ACTIVITY	228	0.372168	1.52803	1.25835e-05	0.000388225	0.00032497	4026	tags=15%, list=7%, signal=14%	HRG/SERPINC1/KNG1/AHSG/SPOCK3/SERPINA7/AMBP/ITIH2/ITIH1/SPINK7/CST9LP1/WFIKKN2/SERPINA10/SERPIND1/CST5/SPP2/SERPINA11/MAL/SERPINA4/PRSS22/VIL1/UMODL1/SPINK1/SERPINA5/CST6/GPC3/LPA/WFDC5/C3P1/SPINK14/ITIH3/C5/DPEP1/SERPINA6/WFDC2
GOBP_REGULATION_OF_LIPOPROTEIN_LIPASE_ACTIVITY	GOBP_REGULATION_OF_LIPOPROTEIN_LIPASE_ACTIVITY	24	0.766052	2.17501	1.26093e-05	0.000388225	0.00032497	360	tags=17%, list=1%, signal=17%	APOA5/APOC3/APOA1/APOH
GOBP_ICOSANOID_METABOLIC_PROCESS	GOBP_ICOSANOID_METABOLIC_PROCESS	123	0.450438	1.73749	1.26916e-05	0.000388932	0.000325562	4787	tags=18%, list=8%, signal=16%	PLA2G4F/CYP2A6/CYP1A2/PON1/PLA2G3/ATP6V1B1/CYP2A7/GGT6/AKR1C4/CYP1A1/CYP2B6/CYP4A22/CYP4A11/AVPR1A/AKR1C1/CYP4F2/DPEP1/HPGD/PON3/PTGDS/PNPLA8/GSTA1
GOCC_INTRINSIC_COMPONENT_OF_MITOCHONDRIAL_INNER_MEMBRANE	GOCC_INTRINSIC_COMPONENT_OF_MITOCHONDRIAL_INNER_MEMBRANE	55	0.598548	2.07035	1.28049e-05	0.000390581	0.000326942	12728	tags=65%, list=22%, signal=51%	MPC1/SFXN2/APOO/GHITM/ETFDH/CHCHD10/AFG3L2/APOOL/HSPA9/SMDT1/TIMM17A/COA3/SLC25A3/MPC2/L2HGDH/COQ2/IMMT/COX11/COX18/TMEM177/SCO1/MTX2/TIMM23/CHCHD3/MCUR1/COX16/SFXN4/SFXN1/CCDC51/SAMM50/MICOS10/MCU/TIMM23B/MICOS13/CHCHD6/SFXN5
GOBP_TRIGLYCERIDE_RICH_LIPOPROTEIN_PARTICLE_REMODELING	GOBP_TRIGLYCERIDE_RICH_LIPOPROTEIN_PARTICLE_REMODELING	14	0.864845	2.22242	1.34171e-05	0.000407358	0.000340985	337	tags=29%, list=1%, signal=28%	APOA5/APOC3/APOA1/APOA2
GOMF_ANTIPORTER_ACTIVITY	GOMF_ANTIPORTER_ACTIVITY	85	0.522338	1.87995	1.47367e-05	0.000445362	0.000372797	5380	tags=21%, list=9%, signal=19%	SLC26A7/SLC4A1/SLC4A9/SLC9A4/SLC24A2/SLC38A3/SLC9A2/SLC22A9/SLC26A3/SLC22A6/SLC26A4/SLC25A5/SLC25A4/SLC4A5/SLC4A11/CLCN5/SLC26A9/SLC4A10
GOBP_PROTEIN_CONTAINING_COMPLEX_REMODELING	GOBP_PROTEIN_CONTAINING_COMPLEX_REMODELING	35	0.677291	2.11232	1.51536e-05	0.000455858	0.000381583	458	tags=17%, list=1%, signal=17%	APOA5/APOC3/ALB/APOA1/APOA2/PLA2G3
GOBP_AMINO_ACID_TRANSPORT	GOBP_AMINO_ACID_TRANSPORT	150	0.424746	1.68079	1.7171e-05	0.000514189	0.00043041	9402	tags=36%, list=17%, signal=30%	SLC38A8/SLC38A3/RIMS1/SLC6A15/SLC36A2/ARG1/CCK/SLC38A4/SLC6A18/SLC7A8/SLC7A3/SLC1A6/AVPR1A/GRM1/SLC6A19/SLC25A48/ACE2/CLTRN/SLC6A20/SLC7A9/SLC6A13/SFXN2/KCNJ10/SLC16A10/SLC1A1/SLC17A7/SLC22A2/SLC25A15/SLC1A2/PDPN/SLC7A7/SLC12A2/SLC47A1/SLC6A12/SLC7A13/SLC17A5/SLC22A4/SLC3A2/STXBP1/SLC25A44/LEP/SLC25A13/SLC43A1/UNC13B/CLN8/SLC25A47/SLC25A12/LLGL2/GLS/XK/SLC43A2/SLC6A17/PSEN1/SLC9A3R1
GOMF_ALCOHOL_BINDING	GOMF_ALCOHOL_BINDING	86	0.505474	1.83329	1.75133e-05	0.000522056	0.000436995	5528	tags=19%, list=10%, signal=17%	APOA5/ADH4/APOC3/APOA1/APOA2/APOF/RBP4/RLBP1/PLCL1/TRPC7/GRAMD1C/ASTN2/PLCL2/ITPR2/TRPC5/PRKCE
GOBP_BICARBONATE_TRANSPORT	GOBP_BICARBONATE_TRANSPORT	43	0.631852	2.09832	1.81413e-05	0.00053833	0.000450617	5471	tags=35%, list=10%, signal=32%	SLC26A7/CFTR/SLC4A1/SLC4A9/SLC26A3/SLC26A4/CA2/SLC4A5/SLC4A11/CA4/CA3/SLC4A4/SLC26A9/SLC4A10/SLC39A8
GOBP_UNSATURATED_FATTY_ACID_METABOLIC_PROCESS	GOBP_UNSATURATED_FATTY_ACID_METABOLIC_PROCESS	115	0.469546	1.77883	1.82402e-05	0.000538824	0.000451031	8410	tags=30%, list=15%, signal=26%	PLA2G4F/CYP2A6/CYP1A2/PLA2G3/ATP6V1B1/CYP2A7/AKR1C4/CYP1A1/CYP2B6/CYP4A22/CYP4A11/AVPR1A/ELOVL4/AKR1C1/CYP4F2/ACSL1/SCD5/HPGD/PTGDS/PNPLA8/GSTA1/ELOVL7/CBR1/FADS2B/HSD17B4/CYP2C18/CYP2J2/EPHX2/ACOX1/PTGES2/SCP2/FAAH2/PLA2G4A/ALOXE3/CYP2E1
GOBP_CELLULAR_MODIFIED_AMINO_ACID_BIOSYNTHETIC_PROCESS	GOBP_CELLULAR_MODIFIED_AMINO_ACID_BIOSYNTHETIC_PROCESS	48	0.627575	2.05959	1.8649e-05	0.000548431	0.000459073	11287	tags=56%, list=20%, signal=45%	GGT6/CKMT1B/CKMT1A/CKMT2/BBOX1/ACADM/GATM/CHAC1/CKB/CHDH/CHAC2/ALDH9A1/GCLC/CNDP2/MTHFS/HAGH/MGST2/ALDH7A1/SHMT1/GCLM/NFE2L2/DHFRP1/TMLHE/GCH1/ATIC/DHFR/DHFR2
GOCC_PLATELET_ALPHA_GRANULE	GOCC_PLATELET_ALPHA_GRANULE	90	0.497469	1.82388	1.90764e-05	0.000558495	0.000467497	2089	tags=10%, list=4%, signal=10%	HRG/ALB/KNG1/ORM2/AHSG/ORM1/EGF/PLG/SERPINA5
GOCC_RESPIRASOME	GOCC_RESPIRASOME	103	0.471374	1.7608	1.9888e-05	0.000579669	0.000485221	13217	tags=65%, list=23%, signal=50%	NDUFC2-KCTD14/HIGD1A/NNT/MTCO2P12/CYCS/COX7A1/UQCRFS1/SDHD/NDUFA4/COX7B/UQCRFS1P1/NDUFS1/COX5A/UQCRC1/NDUFB6/NDUFB5/NDUFC2/UQCRQ/UQCRC2/NDUFAB1/COX8A/NDUFB2/NDUFA6/DMAC1/NDUFB1/COX7A2/NDUFA5/SDHC/COX7A2L/NDUFB3/COX7C/CYC1/SDHB/NDUFB9/UQCR10/NDUFA9/COX6A1/SDHAF4/NDUFA8/SURF1/COX4I1/NDUFS4/NDUFS3/NDUFAF1/NDUFS6/NDUFC1/NDUFA10/TTC19/NDUFV1/NDUFB7/NDUFA2/UQCR11/NDUFS8/UQCRB/UQCRH/NDUFA1/NDUFS2/NDUFB1…
GOBP_NEGATIVE_REGULATION_OF_PEPTIDASE_ACTIVITY	GOBP_NEGATIVE_REGULATION_OF_PEPTIDASE_ACTIVITY	248	0.354976	1.50024	2.06133e-05	0.000598152	0.000500692	2923	tags=12%, list=5%, signal=12%	HRG/SERPINC1/KNG1/AHSG/SPOCK3/SERPINA7/AMBP/VTN/ITIH2/ITIH1/SPINK7/CST9LP1/WFIKKN2/SERPINA10/SERPIND1/CST5/SPP2/SERPINA11/FABP1/SERPINA4/VIL1/UMODL1/SPINK1/SERPINA5/CST6/GPC3/LPA/WFDC5/C3P1/SPINK14
GOBP_NEGATIVE_REGULATION_OF_COAGULATION	GOBP_NEGATIVE_REGULATION_OF_COAGULATION	51	0.615758	2.07068	2.11992e-05	0.000612443	0.000512655	1836	tags=16%, list=3%, signal=15%	HRG/KNG1/APOH/VTN/CPB2/F11/PROC/PLG
GOBP_DIGESTIVE_SYSTEM_PROCESS	GOBP_DIGESTIVE_SYSTEM_PROCESS	99	0.475583	1.79341	2.14743e-05	0.000617668	0.000517028	6855	tags=33%, list=12%, signal=29%	APOA5/SLC26A7/CHRM1/CRH/APOA1/SLC9A4/AQP5/CEL/FABP1/RBP4/VIL1/TAC1/SLC2A2/SLC5A1/AKR1C1/MUC2/PLS1/HRH2/ABCG8/SOX9/ENPP7/LDLR/PTGER3/EZR/MOGAT2/ACO1/CHRM3/PBLD/AQP1/PTGER1/LIMA1/GCNT3/KCNQ1
GOBP_DNA_REPLICATION_DEPENDENT_NUCLEOSOME_ORGANIZATION	GOBP_DNA_REPLICATION_DEPENDENT_NUCLEOSOME_ORGANIZATION	32	0.6914	2.09854	2.28353e-05	0.000653948	0.000547398	3116	tags=34%, list=5%, signal=33%	H4C6/H4C4/H4C2/H3C11/H3C2/H3C7/H4C1/H3C3/H4C13/H4C3/H3C1
GOBP_BILE_ACID_AND_BILE_SALT_TRANSPORT	GOBP_BILE_ACID_AND_BILE_SALT_TRANSPORT	33	0.696803	2.13177	2.44089e-05	0.000695973	0.000582575	6211	tags=39%, list=11%, signal=35%	NR0B2/SLCO1B1/CYP7A1/AKR1C4/SLC10A1/ABCB11/SLC51B/AKR1C1/SLC10A2/SLC27A5/SLC10A5/CEACAM1/SLC51A
GOMF_TRANSLATION_FACTOR_ACTIVITY_RNA_BINDING	GOMF_TRANSLATION_FACTOR_ACTIVITY_RNA_BINDING	84	0.516791	1.85549	2.49276e-05	0.000707685	0.000592379	16046	tags=56%, list=28%, signal=40%	EEF1G/EEF1A2/CPEB1/GFM1/EIF1B/EIF5A2/CPEB3/ETF1/EIF4E/CPEB4/EIF5/EIF1AX/EIF3CL/GSPT1/DHX29/EIF4E1B/EIF2S3B/EEF1A1P5/EIF2S1/CPEB2/ABCF1/EIF4E3/GSPT2/EIF3K/EIF3M/EIF4G2/EIF3J/EIF3A/TUFM/EIF2A/EIF3L/EEF1A1/HBS1L/MRPL58/EFL1/MTIF3/EIF2B3/EIF4A2/EIF1/EEF1B2/EIF2S2/EEFSEC/EIF4G1/MTRF1L/EIF6/EIF2B2/EIF4H
GOBP_RESPONSE_TO_OSMOTIC_STRESS	GOBP_RESPONSE_TO_OSMOTIC_STRESS	82	0.502602	1.81426	2.57038e-05	0.000726577	0.000608192	9139	tags=33%, list=16%, signal=28%	SLC9A4/AQP5/PAPPA2/TACR3/SST/SLC2A4/WNK3/TH/FMO1/SCN2A/SORD/MARVELD3/KCNMA1/MAP7/EFHD1/SLC12A2/AQP1/MBIP/AKR1B1/MICU1/CAB39/TRPV4/ABCB1/DDX3X/TLR3/LETM1/HNMT
GOBP_NEGATIVE_REGULATION_OF_EPITHELIAL_CELL_MIGRATION	GOBP_NEGATIVE_REGULATION_OF_EPITHELIAL_CELL_MIGRATION	102	0.475748	1.78234	3.24535e-05	0.000913434	0.000764604	6206	tags=22%, list=11%, signal=19%	HRG/MIR15A/APOH/MIR188/MIR200C/MIR494/MIR329-1/SLIT2/MIR505/TACSTD2/PFN2/MIR200B/MIR640/MARVELD3/MIR221/DNAJA4/KLF4/MIR361/SYNJ2BP/MIR2355/PPARG/PBLD
GOBP_AMINO_ACID_TRANSMEMBRANE_TRANSPORT	GOBP_AMINO_ACID_TRANSMEMBRANE_TRANSPORT	94	0.483984	1.80203	3.26568e-05	0.000915228	0.000766105	7001	tags=33%, list=12%, signal=29%	SLC38A8/SLC38A3/SLC6A15/SLC36A2/SLC38A4/SLC6A18/SLC7A8/SLC7A3/SLC1A6/GRM1/SLC6A19/ACE2/CLTRN/SLC6A20/SLC7A9/SLC6A13/SFXN2/KCNJ10/SLC16A10/SLC1A1/SLC17A7/SLC22A2/SLC25A15/SLC1A2/PDPN/SLC7A7/SLC47A1/SLC6A12/SLC7A13/SLC22A4/SLC3A2
GOBP_REGULATION_OF_LIPID_CATABOLIC_PROCESS	GOBP_REGULATION_OF_LIPID_CATABOLIC_PROCESS	60	0.546188	1.90732	3.3133e-05	0.000924622	0.000773969	5746	tags=23%, list=10%, signal=21%	APOA5/APOC3/APOA1/APOA2/AADAC/FABP1/ABCB11/PDE3B/ANGPTL3/PLIN5/ENPP7/LDLR/PRKCE/SORL1
GOBP_APICAL_JUNCTION_ASSEMBLY	GOBP_APICAL_JUNCTION_ASSEMBLY	85	0.503456	1.81199	3.41757e-05	0.000949679	0.000794943	11004	tags=42%, list=19%, signal=34%	CLDN8/CLDN6/GRHL2/MARVELD2/OCLN/MPP7/CLDN19/WNT11/CLDN4/CLDN16/MARVELD3/POF1B/CLDN7/CLDN10/FZD5/MPP5/CLDN3/CLDN23/CRB3/PARD6A/FRMPD2/CLDN34/EPHA2/PDCD6IP/CLDN14/PRKCI/SRF/PATJ/CLDN2/CLDN17/PARD6B/WDR1/CTNNA1/RHOA/STRN/DLG1
GOMF_ENDOPEPTIDASE_REGULATOR_ACTIVITY	GOMF_ENDOPEPTIDASE_REGULATOR_ACTIVITY	190	0.380755	1.576	3.46025e-05	0.000955649	0.000799941	4026	tags=16%, list=7%, signal=15%	HRG/SERPINC1/KNG1/AHSG/SPOCK3/SERPINA7/AMBP/ITIH2/ITIH1/SPINK7/CST9LP1/WFIKKN2/SERPINA10/SERPIND1/CST5/SPP2/SERPINA11/SERPINA4/VIL1/SPINK1/SERPINA5/CST6/LPA/WFDC5/C3P1/SPINK14/ITIH3/C5/DPEP1/SERPINA6/WFDC2
GOMF_ATPASE_BINDING	GOMF_ATPASE_BINDING	85	0.502343	1.80798	3.4682e-05	0.000955649	0.000799941	13314	tags=44%, list=23%, signal=33%	ATP6V1G3/ATP6V0A4/ALDOB/PTPN3/PGR/SVIP/SLC26A9/TRPC5/ANK2/EZR/RDX/SLC2A13/ATP6V1E1/GABARAPL2/ATP6V1G1/DNAJB1/PSEN1/WFS1/PEX19/RALB/TAF9/SELENOS/PDE4D/RAB4A/SNTA1/SDF2L1/RALA/ATP6V0A1/PEX26/RUVBL1/NUFIP1/USP25/ATP6V0A2/ATP1B3/TOR1AIP1/SNX10/ATP1B1
GOBP_FATTY_ACID_BETA_OXIDATION	GOBP_FATTY_ACID_BETA_OXIDATION	75	0.514718	1.87654	3.70615e-05	0.00101694	0.000851247	11304	tags=60%, list=20%, signal=48%	FABP1/ABCB11/ACAT1/SLC27A2/AUH/ACADM/PLIN5/EHHADH/ACAA2/PEX7/ABCD3/HADH/ETFDH/ACOX2/ETFA/HADHB/ECI2/CPT1A/AMACR/HSD17B4/ACADL/CPT2/BDH2/IVD/ACOX1/ACAD11/DECR1/ECHDC1/ACADS/SCP2/LEP/CRAT/HADHA/CROT/ECHS1/ECI1/MLYCD/PEX2/GCDH/PPARA/ACAA1/SLC25A17/ACAD10/ETFB/LONP2
GOBP_LIPOPROTEIN_BIOSYNTHETIC_PROCESS	GOBP_LIPOPROTEIN_BIOSYNTHETIC_PROCESS	92	0.48595	1.7991	4.21627e-05	0.0011521	0.00096438	13614	tags=49%, list=24%, signal=37%	HHATL/APOA1/CWH43/ZDHHC23/SVIP/ZDHHC2/ZDHHC3/PPM1A/PIGH/PGAP4/HHAT/PIGW/ZDHHC21/PPM1B/PIGO/RABL3/MTTP/ZDHHC13/ZDHHC4/PIGA/PIGK/ATG5/GOLGA7/PIGX/MPPE1/WIPI1/ZDHHC9/ZDHHC15/PIGF/PIGS/DPM1/DBI/SELENOK/ZDHHC5/WIPI2/GBA/PIGV/PIGZ/WDR45B/PIK3C3/APOB/ZDHHC6/UGCG/PGAP3/PIGP
GOBP_HIGH_DENSITY_LIPOPROTEIN_PARTICLE_REMODELING	GOBP_HIGH_DENSITY_LIPOPROTEIN_PARTICLE_REMODELING	18	0.798671	2.18289	4.41827e-05	0.00120228	0.00100639	458	tags=28%, list=1%, signal=28%	APOC3/ALB/APOA1/APOA2/PLA2G3
GOBP_CELL_CELL_JUNCTION_ASSEMBLY	GOBP_CELL_CELL_JUNCTION_ASSEMBLY	145	0.410623	1.63366	4.5464e-05	0.00123113	0.00103053	11004	tags=34%, list=19%, signal=28%	CLDN8/CDH12/CLDN6/GRHL2/CDH7/CDH20/MARVELD2/OCLN/MPP7/CLDN19/WNT11/CDH19/UGT8/CLDN4/GJB6/ACE2/GJB1/CLDN16/MARVELD3/CD9/POF1B/CLDN7/CLDN10/FZD5/MPP5/CLDN3/CLDN23/CRB3/PARD6A/TRPV4/FRMPD2/CLDN34/EPHA2/PDCD6IP/AGT/CLDN14/PRKCI/TLN2/SRF/PATJ/PKP4/CLDN2/CLDN17/PARD6B/WDR1/CTNNA1/RHOA/STRN/EPB41L3/DLG1
GOCC_CORTICAL_CYTOSKELETON	GOCC_CORTICAL_CYTOSKELETON	104	0.463501	1.73683	4.56181e-05	0.00123113	0.00103053	10808	tags=35%, list=19%, signal=28%	PVALB/SLC4A1/RIMS1/MYZAP/CALB1/CAPZA3/MYRIP/SPTBN2/SHROOM3/COBL/GYS2/PLS1/CDH1/BSN/NOS2/CIB2/EZR/RDX/CAPZA2/WASL/TRPV4/LLGL2/NSMF/DSTN/MPP1/DMTN/PPP1R9A/PCLO/RIMS2/LANCL2/SPTBN4/MAPRE1/DCDC2C/MYADM/SPTBN1/WDR1
GOBP_ODONTOGENESIS	GOBP_ODONTOGENESIS	122	0.429668	1.64837	4.60223e-05	0.00123694	0.0010354	3209	tags=11%, list=6%, signal=11%	AQP6/KLK4/ODAM/AQP5/PAX9/BMP7/SOSTDC1/SLC34A1/AMTN/AMELX/ENAM/CA2/EDAR/TSPEAR
GOBP_PROTEIN_LIPID_COMPLEX_SUBUNIT_ORGANIZATION	GOBP_PROTEIN_LIPID_COMPLEX_SUBUNIT_ORGANIZATION	55	0.573683	1.98434	4.89864e-05	0.00131124	0.00109759	615	tags=13%, list=1%, signal=13%	APOA5/APOC3/ALB/APOA1/APOA2/PLA2G3/SH3GL2
GOMF_VITAMIN_BINDING	GOMF_VITAMIN_BINDING	145	0.409179	1.62792	5.07606e-05	0.00135241	0.00113206	9297	tags=38%, list=16%, signal=32%	ADH4/ALB/TAT/AGXT/CALB1/ETNPPL/GC/TTPA/FOLR3/OGDHL/RBP4/GNMT/ALDH1A2/DDC/GOT1/KL/RLBP1/ABAT/PHYH/AGXT2/PCCA/AFM/VDR/MMUT/FTCDNL1/CUBN/GOT2/ALAS1/GPT2/SPTLC3/PC/OGDH/ILVBL/OAT/MTARC2/LMBRD1/HACL1/SDSL/DHTKD1/GLDC/FOLR1/SPTLC2/MTHFS/TCN1/PNPO/TPK1/GPT/MCCC1/TCN2/SHMT1/PANK3/SDS/FTCD/SPTLC1/KYNU
GOMF_OXIDOREDUCTASE_ACTIVITY_ACTING_ON_PAIRED_DONORS_WITH_INCORPORATION_OR_REDUCTION_OF_MOLECULAR_OXYGEN_NAD_P_H_AS_ONE_DONOR_AND_INCORPORATION_OF_ONE_ATOM_OF_OXYGEN	GOMF_OXIDOREDUCTASE_ACTIVITY_ACTING_ON_PAIRED_DONORS_WITH_INCORPORATION_OR_REDUCTION_OF_MOLECULAR_OXYGEN_NAD_P_H_AS_ONE_DONOR_AND_INCORPORATION_OF_ONE_ATOM_OF_OXYGEN	48	0.605711	1.98784	5.09371e-05	0.00135241	0.00113206	8865	tags=40%, list=16%, signal=33%	CYP7A1/AKR1C4/CYP1A1/CYP3A4/AKR1D1/CYP2B6/CYP4A22/CYP4A11/AKR1C1/CYP4F2/FMO5/FMO1/NOS2/CYP51A1/MSMO1/CYP7B1/CYP27A1/CYP2E1/FAXDC2
GOBP_THIOESTER_BIOSYNTHETIC_PROCESS	GOBP_THIOESTER_BIOSYNTHETIC_PROCESS	53	0.586121	1.99283	5.18981e-05	0.00137237	0.00114876	9529	tags=51%, list=17%, signal=42%	ACAT1/ELOVL4/ACSL1/SCD5/ACSL6/ACSBG1/DLD/ELOVL7/PDP1/HSD17B12/HSD17B8/DLAT/PDHA1/ACSL3/PDP2/GSTZ1/PDHX/PDHB/MPC2/CBR4/HACD2/ACSL4/ACSS1/MLYCD/PDK2/PDK4/GCDH
GOBP_TOXIN_TRANSPORT	GOBP_TOXIN_TRANSPORT	39	0.628235	1.9814	5.24472e-05	0.00138132	0.00115626	15920	tags=82%, list=28%, signal=59%	ANTXRL/SLC7A8/RAB40B/SLC22A2/DNAJA1/RAB29/SLC17A3/SLC22A1/LRP5/MTMR12/HSPA5/SCFD1/BNIP3/RAB28/CCT4/ATP6V0A1/CCT2/LRP6/TCP1/CCT5/TRIP4/CCT6B/CD274/CCT8/COPB2/RAB43/CCT7/SLC29A4/CCT3/SLC22A3/ABCG1/ADAM10
GOBP_LONG_CHAIN_FATTY_ACID_METABOLIC_PROCESS	GOBP_LONG_CHAIN_FATTY_ACID_METABOLIC_PROCESS	120	0.434447	1.655	5.63686e-05	0.00147866	0.00123774	8410	tags=37%, list=15%, signal=31%	CYP2A6/CYP1A2/CYP2A7/CYP1A1/CYP3A4/CYP2B6/CYP4A22/CYP4A11/CYP4F2/SLC27A2/ACOT1/ACSL1/ACSL6/HPGD/SLC27A5/PTGDS/PNPLA8/ACSBG1/ACSM2B/ACOT4/GSTA1/ADTRP/CBR1/ACOT2/ACSL3/SLC27A4/CPT1A/HSD17B4/ACADL/CPT2/PLP1/CYP2C18/CYP2J2/EPHX2/ACOX1/HACL1/PTGES2/SCP2/ACSM2A/FAAH2/ACSL4/PLA2G4A/ALOXE3/CYP2E1
GOMF_NADP_BINDING	GOMF_NADP_BINDING	53	0.581515	1.97717	6.10373e-05	0.00159475	0.00133491	11486	tags=49%, list=20%, signal=39%	NOX5/NNT/CRYM/FMO5/CAT/FMO1/NOS2/TM7SF2/QDPR/DHCR7/HIBADH/CRYZ/GRHPR/ME1/HMGCR/DECR1/CBR4/SPR/ASPDH/GLYR1/DHFRP1/GSR/DHFR/DHFR2/GMDS/FMO4
GOMF_THYROID_HORMONE_RECEPTOR_BINDING	GOMF_THYROID_HORMONE_RECEPTOR_BINDING	29	0.698502	2.10388	6.13583e-05	0.00159678	0.00133661	60	tags=3%, list=0%, signal=3%	NR0B2
GOBP_CYTOLYSIS	GOBP_CYTOLYSIS	31	0.681321	2.05874	6.58057e-05	0.00170575	0.00142782	2134	tags=23%, list=4%, signal=22%	HRG/CFHR5/CFHR2/C8B/C8A/CFHR1/REG3G
GOMF_LYASE_ACTIVITY	GOMF_LYASE_ACTIVITY	193	0.375093	1.5627	6.68719e-05	0.00172656	0.00144524	9334	tags=34%, list=16%, signal=29%	CYP17A1/CA10/CYP1A2/ALDOB/ETNPPL/CYP1A1/URAD/HAL/CA2/DDC/GOT1/DDT/HACD3/AUH/AMD1/PCK1/CA4/EHHADH/GGACT/CA3/ACMSD/ACO2/HCCS/CHAC1/PCK2/FH/FAHD1/CLYBL/ENO3/ODC1/ECHDC3/ACO1/HADHB/APIP/HSD17B4/CHAC2/PM20D1/PCBD1/HOGA1/ILVBL/CA5A/ME1/GLO1/HACL1/PTGES2/SDSL/ECHDC1/PTS/ADCY1/FECH/GLDC/HADHA/HACD2/ALOXE3/ECHS1/ECI1/MGST2/DGLUCY/MLYCD/UXS1/SHMT1/CA13/ADCY5/SDS/FTCD/ALAD
GOBP_CELLULAR_RESPONSE_TO_CARBOHYDRATE_STIMULUS	GOBP_CELLULAR_RESPONSE_TO_CARBOHYDRATE_STIMULUS	137	0.414069	1.61272	6.73821e-05	0.00173291	0.00145056	9323	tags=30%, list=16%, signal=25%	MIR15A/CFTR/CRH/EPHA5/CYP7A1/CPB2/OXCT1/CASR/PDX1/KCNJ11/PPARGC1A/GRIK5/TH/GJB6/COLEC12/CLTRN/VSNL1/PCK1/CMA1/PCK2/PRKCE/ENDOG/SELENOT/RAB11FIP2/GPR27/PRKAA2/CCDC186/RAB11FIP5/MPC2/LEP/UNC13B/CAMK2N1/OPA1/LRP5/GPER1/MAP2K4/CALCRL/SRF/GCLM/ADCY5/GAS6
GOBP_NEGATIVE_REGULATION_OF_RESPONSE_TO_WOUNDING	GOBP_NEGATIVE_REGULATION_OF_RESPONSE_TO_WOUNDING	89	0.477246	1.73787	6.76485e-05	0.00173297	0.00145061	6372	tags=20%, list=11%, signal=18%	HRG/KNG1/APOH/VTN/CPB2/F11/PROC/PLG/CLDN19/MIR200B/CD9/AJAP1/KLKB1/ADTRP/CEACAM1/SLC12A2/F12/CLDN3
GOBP_CELLULAR_PIGMENTATION	GOBP_CELLULAR_PIGMENTATION	52	0.565573	1.91473	6.88838e-05	0.00175774	0.00147135	14724	tags=58%, list=26%, signal=43%	PMEL/GPR143/TYRP1/SHROOM3/ARL6/MKKS/RAB17/RAB29/AP1G1/MREG/TRAPPC6A/CDH3/RAB1A/RAB11A/RAB32/BCL2/BLOC1S2/AP3B1/SHROOM2/MYO7A/PIKFYVE/BLOC1S6/BBS7/BLOC1S5/ANKRD27/RAB27A/BBS2/AP3D1/BLOC1S4/RAB38
GOBP_SPHINGOLIPID_METABOLIC_PROCESS	GOBP_SPHINGOLIPID_METABOLIC_PROCESS	167	0.381092	1.52958	6.94956e-05	0.00176648	0.00147866	10007	tags=35%, list=18%, signal=29%	SFTPB/CEL/KIT/FA2H/ST8SIA5/NEU4/FUT3/CERKL/UGT8/ELOVL4/TH/B4GALT6/GBA3/ABCA8/HACD3/ASAH1/FUT6/SGPP1/SGMS2/ELOVL7/ENPP7/DEGS2/SPTLC3/SMPD1/SPTSSA/PLPP3/GLB1/ST8SIA6/PPP2CA/SGMS1/B3GALNT1/PRKCD/SUMF1/CERS4/SPNS2/VAPA/GLTP/HACD2/SPTLC2/B4GALNT1/SERINC1/ITGB8/KDSR/ALOXE3/CLN8/ST3GAL1/PPM1L/PLPP1/B3GALT1/SPTLC1/ALDH3A2/CERT1/ARV1/ORMDL2/TEX2/SGPP2/NEU1/HEXB/CERS6
GOCC_IMMUNOGLOBULIN_COMPLEX	GOCC_IMMUNOGLOBULIN_COMPLEX	156	-0.528616	-1.55359	7.47007e-05	0.00188865	0.00158093	14330	tags=60%, list=25%, signal=45%	IGLV5-52/IGKV1-5/IGHD/IGKC/IGKV5-2/IGLV8-61/IGKV3-7/IGKV2D-30/IGHJ1/IGLV3-19/IGHM/CD79A/IGHV4-34/IGHV4-4/IGLC2/IGLV2-8/IGHA2/IGHG2/IGHV3-15/IGHG1/IGLV1-47/IGHV3-72/IGLC6/IGLV1-44/IGHV3-16/IGLV5-37/IGKV1D-42/IGHV3-23/IGHV4-61/IGLV3-32/IGHV3-11/IGKV3D-15/IGLV2-18/IGHV5-10-1/IGHV7-4-1/IGKV1-39/IGHV3-33/IGHV3-21/IGHV3-35/IGLV2-14/IGLV3-27/IGHV3-43/IGKV1D-39/IGKV3-20/IGHV7-81/IGKV3-15/IGLV2-11/IGKV1D-…
GOBP_PIGMENTATION	GOBP_PIGMENTATION	93	0.467386	1.7283	7.4878e-05	0.00188865	0.00158093	10925	tags=37%, list=19%, signal=30%	PMEL/TYR/GPR143/KIT/TYRP1/EDAR/SLC45A2/TH/SHROOM3/IHH/ATP6AP2/ARL6/KITLG/EDNRB/ENPP1/MKKS/GNA11/RAB17/RAB29/SPNS2/AP1G1/MREG/TRAPPC6A/CDH3/RAB1A/RAB11A/ATP7A/RAB32/EDA/BCL2/MITF/BLOC1S2/ATRN/AP3B1
GOBP_INORGANIC_ION_IMPORT_ACROSS_PLASMA_MEMBRANE	GOBP_INORGANIC_ION_IMPORT_ACROSS_PLASMA_MEMBRANE	97	0.458335	1.70617	7.68297e-05	0.00192594	0.00161214	5998	tags=25%, list=11%, signal=22%	SLC9A4/SLC24A2/SLC9A2/SLC12A3/HCN2/ATP4B/SLC34A1/KCNJ1/SLC12A1/ATP12A/TRPV5/KCNJ11/SLC5A2/TRPV6/SLC5A1/WNK3/ATP4A/FAM155B/ATP1A1/KCNJ10/SLC39A8/SLC31A1/HCN4/SLC12A2
GOCC_RECYCLING_ENDOSOME_MEMBRANE	GOCC_RECYCLING_ENDOSOME_MEMBRANE	86	0.483478	1.75351	7.69436e-05	0.00192594	0.00161214	12992	tags=49%, list=23%, signal=38%	SLC26A7/CFTR/ABCB11/ZDHHC2/PLEKHB2/ABHD17C/SLC1A1/PDLIM4/SORL1/SCAMP1/RAB11FIP2/RAB11FIP4/PACSIN2/VAMP8/RAB11FIP5/ABHD17B/RAB17/SCAMP5/CLCN4/BOK/HLA-G/VTI1B/RAB14/FZD7/RAB11A/B2M/RAB10/ARF6/ATP11B/BAIAP3/RAB4A/EHD1/CMTM6/STX12/NSG1/HLA-H/RAP2A/SLC9A6/HLA-C/RAB12/HLA-B/SCAMP2
GOMF_CHAPERONE_BINDING	GOMF_CHAPERONE_BINDING	101	0.454104	1.71542	7.73067e-05	0.00192767	0.00161359	10827	tags=38%, list=19%, signal=31%	CFTR/ALB/PACRG/PLG/LRP2/DNAJB9/ATP1A1/FNIP2/BAG1/DNAJA4/AMFR/PDPN/CDC37L1/SLC12A2/DNAJA1/HSPA8/HSPD1/FICD/HSPE1/TIMM10/BAG5/DNAJA2/BIN1/DNAJB1/DNAJC1/MAPT/GRPEL1/DNAJC3/ATP7A/DNAJB5/GNB5/HSPA2/HSPA5/BAG3/ST13/CLU/SLC25A17/STUB1
GOBP_POTASSIUM_ION_HOMEOSTASIS	GOBP_POTASSIUM_ION_HOMEOSTASIS	29	0.692981	2.08726	7.77203e-05	0.00193064	0.00161607	4755	tags=38%, list=8%, signal=35%	SLC9A4/ATP6V1B1/SLC12A3/ATP4B/SLC12A1/ATP12A/TFAP2B/ATP4A/ATP1A1/KCNJ10/KCNMA1
GOBP_BRANCHED_CHAIN_AMINO_ACID_METABOLIC_PROCESS	GOBP_BRANCHED_CHAIN_AMINO_ACID_METABOLIC_PROCESS	23	0.735307	2.10169	7.83362e-05	0.0019386	0.00162273	9254	tags=74%, list=16%, signal=62%	ACAT1/BCKDHB/AUH/ALDH6A1/HIBCH/ACADSB/DLD/HIBADH/ILVBL/IVD/ACAD8/SDSL/SLC25A44/MCCC2/MCCC1/DBT/SDS
GOBP_REGULATION_OF_RESPONSE_TO_ENDOPLASMIC_RETICULUM_STRESS	GOBP_REGULATION_OF_RESPONSE_TO_ENDOPLASMIC_RETICULUM_STRESS	81	0.491749	1.77709	7.87576e-05	0.0019417	0.00162533	15631	tags=58%, list=27%, signal=42%	AGR2/PDX1/DNAJB9/SVIP/TMEM33/PPP1R15B/FICD/PMAIP1/BOK/HERPUD1/UBQLN1/OPA1/LPCAT3/DNAJC3/EIF2AK3/CREB3/NFE2L2/TMBIM6/XBP1/AQP11/USP14/HSPA5/WFS1/RNF185/UFL1/CLU/SELENOS/LRRK2/UBQLN2/DDIT3/MBTPS2/PIK3R1/SIRT1/USP25/ATF6/DDRGK1/USP19/BAK1/BCAP31/MANF/RNF183/ERP29/BCL2L1/RNFT1/BFAR/DAB2IP/TMED2
GOMF_CHLORIDE_TRANSMEMBRANE_TRANSPORTER_ACTIVITY	GOMF_CHLORIDE_TRANSMEMBRANE_TRANSPORTER_ACTIVITY	101	0.453384	1.71271	8.05503e-05	0.00197414	0.00165248	3247	tags=17%, list=6%, signal=16%	BSND/SLC26A7/CLCNKB/CFTR/SLC4A1/CLCNKA/SLC6A2/SLC12A3/SLC18A2/ANO5/SLC12A1/SLC26A3/SLC26A4/SLC6A4/CLIC5/ANO4/CLDN4
GOBP_ORGANOPHOSPHATE_ESTER_TRANSPORT	GOBP_ORGANOPHOSPHATE_ESTER_TRANSPORT	132	0.430228	1.68689	8.07434e-05	0.00197414	0.00165248	9867	tags=31%, list=17%, signal=26%	APOA5/APOC3/SLC4A1/APOA1/APOA2/TMEM30B/TNFAIP8L3/ABCA4/SLC25A5/ANO4/G6PC/SLC25A4/SLC44A4/SLC25A33/SLC25A25/ABCG8/ATP9A/LDLR/TRPC5/GLTPD2/ABCC4/ATP10D/PRELID3B/PRKCD/ATP8A1/SCP2/XKR4/SLC17A3/GLTP/OSBPL8/MTTP/ABCB1/PLEKHA3/ABCC6/SLC33A1/TMEM30A/SLC25A51/CERT1/CETP/SLC25A24/ATP11A
GOCC_HIGH_DENSITY_LIPOPROTEIN_PARTICLE	GOCC_HIGH_DENSITY_LIPOPROTEIN_PARTICLE	27	0.706347	2.06875	8.09765e-05	0.00197414	0.00165248	435	tags=26%, list=1%, signal=26%	APOA5/APOC3/APOA1/APOA2/APOH/APOF/PON1
GOCC_PORE_COMPLEX	GOCC_PORE_COMPLEX	23	0.734266	2.09871	8.25253e-05	0.00200166	0.00167552	11706	tags=61%, list=21%, signal=48%	C8B/C8A/C6/C5/TSPAN33/PPIF/C9/VDAC1/PLEKHA7/BCL2/VDAC2/VDAC3/TOMM40L/C7
GOBP_CIRCADIAN_REGULATION_OF_GENE_EXPRESSION	GOBP_CIRCADIAN_REGULATION_OF_GENE_EXPRESSION	67	0.515695	1.85016	8.27156e-05	0.00200166	0.00167552	2072	tags=6%, list=4%, signal=6%	NR0B2/PASD1/PPARGC1A/USP2
GOMF_BICARBONATE_TRANSMEMBRANE_TRANSPORTER_ACTIVITY	GOMF_BICARBONATE_TRANSMEMBRANE_TRANSPORTER_ACTIVITY	21	0.748349	2.1203	8.47112e-05	0.00204241	0.00170963	5471	tags=57%, list=10%, signal=52%	SLC26A7/CFTR/SLC4A1/SLC4A9/SLC26A3/SLC26A4/SLC4A5/SLC4A11/SLC4A4/SLC26A9/SLC4A10/SLC39A8
GOCC_RESPIRATORY_CHAIN_COMPLEX	GOCC_RESPIRATORY_CHAIN_COMPLEX	87	0.467105	1.70173	8.70056e-05	0.00208498	0.00174527	13603	tags=68%, list=24%, signal=52%	NDUFC2-KCTD14/MTCO2P12/UQCRFS1/SDHD/NDUFA4/COX7B/UQCRFS1P1/NDUFS1/COX5A/UQCRC1/NDUFB6/NDUFB5/NDUFC2/UQCRQ/UQCRC2/NDUFAB1/COX8A/NDUFB2/NDUFA6/DMAC1/NDUFB1/NDUFA5/SDHC/NDUFB3/COX7C/CYC1/SDHB/NDUFB9/UQCR10/NDUFA9/COX6A1/SDHAF4/NDUFA8/COX4I1/NDUFS4/NDUFS3/NDUFAF1/NDUFS6/NDUFC1/NDUFA10/NDUFV1/NDUFB7/NDUFA2/NDUFS8/UQCRB/UQCRH/NDUFA1/NDUFS2/NDUFB10/NDUFB11/NDUFB4/COX4I2/NDUFS7/COA6/NDUFB8/NDUFA12/SDHA/F…
GOBP_REGULATION_OF_HORMONE_SECRETION	GOBP_REGULATION_OF_HORMONE_SECRETION	257	0.340605	1.46261	8.7362e-05	0.00208498	0.00174527	6931	tags=21%, list=12%, signal=18%	NR0B2/NKX6-1/CFTR/CRH/EPHA5/PLA2G3/STXBP5L/MTNR1B/ADCYAP1/OXCT1/MYRIP/RBP4/PFKFB2/CASR/PDX1/KCNJ11/ACVR1C/SYT9/CRHBP/SFRP1/TAC1/SLC25A5/SLC2A2/TFAP2B/ILDR1/SLC25A4/SSTR5/HTR2C/CLTRN/DPP4/VSNL1/GALR1/NOS2/CACNA1D/REN/UCN3/SYT7/PCK2/ITPR2/HADH/PRKCE/AGTR1/SELENOT/KCNC2/CRY1/GLUD1/GPR27/CPT1A/GAL/CCKAR/VAMP8/SNX4/RAB11FIP5
GOBP_ERBB_SIGNALING_PATHWAY	GOBP_ERBB_SIGNALING_PATHWAY	143	0.404488	1.60599	8.74307e-05	0.00208498	0.00174527	10539	tags=29%, list=19%, signal=24%	SH3GL2/FAM83B/AGR2/PIGR/NEURL1/EGF/VIL1/ERBB4/EREG/NRG2/HAP1/BTC/PTPN3/SOX9/LGMN/GAREM1/NRG4/MIR29A/CEACAM1/HSP90AA1/CUL5/RTN4/SOCS4/DUSP3/ERBB2/TSG101/PTPRJ/STAM2/PIK3C2A/PTPRR/AGT/GPER1/PSEN1/CPNE3/STAM/SLC30A10/MAPK1/KIF16B/SPRY2/PIK3CA/PDPK1/RAB7A
GOMF_ORGANIC_HYDROXY_COMPOUND_TRANSMEMBRANE_TRANSPORTER_ACTIVITY	GOMF_ORGANIC_HYDROXY_COMPOUND_TRANSMEMBRANE_TRANSPORTER_ACTIVITY	49	0.583986	1.96323	8.95867e-05	0.00212866	0.00178183	7129	tags=47%, list=13%, signal=41%	SLCO1B1/SLC6A2/AQP2/AKR1C4/SLC10A1/SLC18A2/SLC16A7/ABCB11/RBP4/SLC6A4/SLC51B/SLC5A1/SLC5A8/SLC10A2/SLC10A5/CEACAM1/SLC5A12/SLC2A13/SLC51A/AQP1/AQP7/SLCO1A2/SLC5A11
GOBP_TRNA_METABOLIC_PROCESS	GOBP_TRNA_METABOLIC_PROCESS	177	0.377615	1.52889	9.20599e-05	0.00217953	0.00182441	16586	tags=58%, list=29%, signal=41%	MARS2/PPA2/LARS2/TRUB1/LCMT2/TRMT10C/AIMP2/DTWD2/DPH3/NARS1/DTD2/RPP25L/NARS2/GRSF1/EARS2/ELP3/TRMT61B/TP53RK/ELAC1/THUMPD3/QRSL1/TRMO/TRNT1/CLP1/RTCB/DARS2/ELP4/EEF1E1/TRMT1L/GATB/FAM98B/PRORP/TRMT9B/PARS2/TRMT6/MTFMT/PPA1/TRMT12/DDX1/POLR3K/KTI12/FARS2/TRMT2B/RPP14/TRMT5/FARSB/TARS1/WARS2/TSEN15/IARS2/DARS1/THUMPD1/PUS3/ADAT1/METTL2A/TYW3/MOCS3/RPP25/ALKBH1/TPRKB/PSTK/SSB/ELP6/POP4/TRMT10A/AARS…
GOBP_PORPHYRIN_CONTAINING_COMPOUND_METABOLIC_PROCESS	GOBP_PORPHYRIN_CONTAINING_COMPOUND_METABOLIC_PROCESS	40	0.635228	2.01789	9.39865e-05	0.00221714	0.00185589	12142	tags=52%, list=21%, signal=41%	CYP1A2/AMBP/HPX/CYP1A1/UGT1A4/SUCLA2/ALAS1/FXN/BDH2/PGRMC1/FECH/BLVRA/IBA57/ALAD/SLC25A39/TMEM14C/COX10/IREB2/ALAS2/HMBS/COX15
GOCC_PROTON_TRANSPORTING_TWO_SECTOR_ATPASE_COMPLEX_PROTON_TRANSPORTING_DOMAIN	GOCC_PROTON_TRANSPORTING_TWO_SECTOR_ATPASE_COMPLEX_PROTON_TRANSPORTING_DOMAIN	24	0.730297	2.07349	9.52548e-05	0.002239	0.00187419	8070	tags=54%, list=14%, signal=46%	ATP6V0A4/ATP6V0D2/ATP5MC3/ATP5MG/ATP6V0B/ATP5ME/ATP6V0D1/ATP6V0E2/ATP5PF/ATP5PB/DMAC2L/ATP5MC1/ATP5PO
GOBP_HEME_METABOLIC_PROCESS	GOBP_HEME_METABOLIC_PROCESS	33	0.671121	2.0532	9.86024e-05	0.00230941	0.00193313	14377	tags=67%, list=25%, signal=50%	AMBP/HPX/UGT1A4/ALAS1/FXN/BDH2/PGRMC1/FECH/BLVRA/IBA57/ALAD/SLC25A39/TMEM14C/COX10/IREB2/ALAS2/HMBS/COX15/SLC25A38/UGT1A1/HMOX2/UROS
GOMF_ANKYRIN_BINDING	GOMF_ANKYRIN_BINDING	20	0.762981	2.16507	0.000100194	0.00233525	0.00195476	4685	tags=35%, list=8%, signal=32%	RHCG/RHBG/SLC4A1/KCNJ11/CDH1/ATP1A1/CACNA1D
GOBP_REGULATION_OF_ENDOTHELIAL_CELL_MIGRATION	GOBP_REGULATION_OF_ENDOTHELIAL_CELL_MIGRATION	212	0.352428	1.44197	0.000100418	0.00233525	0.00195476	6118	tags=15%, list=11%, signal=13%	HRG/MIR15A/APOH/MIR188/MIR200C/EGF/FGFBP1/MIR494/MIR329-1/SLIT2/MIR505/MIR200A/MIR200B/CCBE1/ATP5F1A/MIR640/MIR221/ANXA3/ATP5F1B/LGMN/DNAJA4/KLF4/MIR29A/CEACAM1/ANGPT1/MIR361/SYNJ2BP/FGF1/MIR2355/MIR27B/PPARG
GOBP_DICARBOXYLIC_ACID_TRANSPORT	GOBP_DICARBOXYLIC_ACID_TRANSPORT	93	0.460413	1.70251	0.00010173	0.00235741	0.00197331	8693	tags=33%, list=15%, signal=28%	SLC26A7/SLC13A2/RIMS1/CCK/FOLR3/SLC26A3/SLC22A6/SLC26A4/SLC25A21/SLC1A6/AVPR1A/GRM1/SLC19A2/LRP2/KCNJ10/SLC1A1/SLC17A7/SLC26A9/SLC1A2/SLC12A2/SLC13A3/STXBP1/SLC13A5/SLC25A13/FOLR1/UNC13B/SLC25A11/SLC25A30/CLN8/SLC25A12/GLS
GOBP_CHROMATIN_ASSEMBLY_OR_DISASSEMBLY	GOBP_CHROMATIN_ASSEMBLY_OR_DISASSEMBLY	221	0.361393	1.51138	0.000102331	0.00236297	0.00197796	3250	tags=10%, list=6%, signal=9%	TSPY2/TSPY1/H2BW2/H4C6/H1-5/TSPY10/H2BC3/H4C4/H4C2/H3C11/H2BC10/H3C2/H3C7/H4C1/H1-1/H1-4/H3C3/H4C13/H1-3/H4C3/H3C1/H2BC14
GOBP_NEGATIVE_REGULATION_OF_ANION_TRANSPORT	GOBP_NEGATIVE_REGULATION_OF_ANION_TRANSPORT	206	0.357681	1.47092	0.000105746	0.00243327	0.0020368	9049	tags=24%, list=16%, signal=20%	APOC3/CRH/APOA2/STXBP5L/MTNR1B/MIR130B/EGF/MIR33A/KCNJ11/ACVR1C/PKIA/PCSK9/CRHBP/MIR103A1/SFRP1/IL12B/CYP4F2/VSNL1/SVIP/FERMT1/ABCG8/LYPLA1/NDFIP1/ADTRP/NDFIP2/ANGPT1/ENPP1/MIR27B/CYP51A1/INSIG1/CRY1/DPH3/RAB11FIP5/CHP1/HMGCR/IDH2/LEP/AGTR2/FAM3D/USP17L2/SLC43A1/SHH/MIR33B/RAB11FIP1/CD36/ENHO/MIR301B/FIS1/DMTN/SLC43A2
GOBP_DRUG_METABOLIC_PROCESS	GOBP_DRUG_METABOLIC_PROCESS	45	0.584483	1.9288	0.00010747	0.00246428	0.00206277	7186	tags=42%, list=13%, signal=37%	ADH1A/CYP2A6/CYP1A2/CYP2A7/CYP1A1/CYP3A4/ABCB11/BCHE/CYP2B6/CYP4F2/FMO5/DPEP1/FMO1/CBR1/UGT1A7/CYP2C18/CYP2J2/TPMT/ADAL
GOBP_TETRAPYRROLE_METABOLIC_PROCESS	GOBP_TETRAPYRROLE_METABOLIC_PROCESS	62	0.539136	1.88838	0.0001096	0.00250438	0.00209633	9334	tags=39%, list=16%, signal=32%	CYP1A2/AMBP/HPX/CYP1A1/UGT1A4/PRSS3/MMUT/SUCLA2/CUBN/ALAS1/CLYBL/AMN/FXN/BDH2/PGRMC1/LMBRD1/FECH/MMADHC/TCN1/TCN2/BLVRA/IBA57/MMAA/ALAD
GOBP_RESPONSE_TO_ALCOHOL	GOBP_RESPONSE_TO_ALCOHOL	233	0.343119	1.42932	0.00011297	0.00257243	0.00215329	6570	tags=18%, list=12%, signal=16%	NR0B2/CFTR/CRH/DEFB104B/CYP7A1/ADCYAP1/SLC10A1/OXCT1/F7/RBP4/CES1/CSF3/DEFB104A/SLIT2/ADH6/AVPR1A/CRHBP/SFRP1/SLC2A4/TH/FDX1/CSN1S1/FOSB/CAT/CDH1/HPGD/GRAMD1C/CA3/CLDN7/UCN3/GOT2/ITPR2/KLF4/PRKCE/GGH/CDO1/PPARG/KCNC2/CPT1A/CLDN3/PRKAA2/HMGCS1
GOMF_INORGANIC_ANION_EXCHANGER_ACTIVITY	GOMF_INORGANIC_ANION_EXCHANGER_ACTIVITY	13	0.841981	2.13638	0.000114416	0.00259028	0.00216823	5380	tags=69%, list=9%, signal=63%	SLC4A1/SLC4A9/SLC22A8/SLC22A6/SLC22A11/SLC4A5/SLC4A11/SLC4A4/SLC4A10
GOBP_INORGANIC_ANION_TRANSMEMBRANE_TRANSPORT	GOBP_INORGANIC_ANION_TRANSMEMBRANE_TRANSPORT	120	0.423155	1.61198	0.000114651	0.00259028	0.00216823	5313	tags=20%, list=9%, signal=18%	BSND/SLC26A7/CLCNKB/CFTR/SLC4A1/CLCNKA/SLC12A3/SLC34A1/ANO5/SLC12A1/SLC26A3/SLC26A4/CASR/CLIC5/SLC13A1/ANO4/CLDN4/SLC4A11/GABRA2/SLC1A1/CLCN5/GABRG1/GABRB3/SLC26A9
GOBP_PROTEIN_ACTIVATION_CASCADE	GOBP_PROTEIN_ACTIVATION_CASCADE	27	0.697946	2.04414	0.000114939	0.00259028	0.00216823	1204	tags=22%, list=2%, signal=22%	SERPINC1/KNG1/F9/APOH/F7/F11
GOBP_PURINE_CONTAINING_COMPOUND_BIOSYNTHETIC_PROCESS	GOBP_PURINE_CONTAINING_COMPOUND_BIOSYNTHETIC_PROCESS	206	0.356934	1.46785	0.000115582	0.00259586	0.0021729	12916	tags=49%, list=23%, signal=38%	AK5/PPARGC1A/GMPR/ACAT1/ATP6V1A/PKLR/MTCO2P12/ELOVL4/PANK1/ATP5F1A/ACSL1/SCD5/ACSL6/AMD1/NOS2/ACSBG1/DLD/ATP5MC3/ELOVL7/ATP5MG/ATP5F1B/GUCA2B/HPRT1/PDP1/HSD17B12/AK3/HSD17B8/DLAT/ATP5ME/PDHA1/ACSL3/PDP2/GSTZ1/PDHX/PDHB/ATP5PF/ATP5PB/ADK/DMAC2L/ADAL/MPC2/CBR4/ADCY1/PRKAG2/SLC25A13/ATPSCKMT/PNP/PINK1/HACD2/ATP5MC1/ATP5PO/ACSL4/LDHC/ACSS1/SLC25A12/MLYCD/MTHFD2L/NME5/AMPD3/ATP5F1C/SHMT1/PANK3/ADCY5/P…
GOMF_PDZ_DOMAIN_BINDING	GOMF_PDZ_DOMAIN_BINDING	83	0.474535	1.72184	0.000121224	0.00271327	0.00227118	13777	tags=55%, list=24%, signal=42%	CFTR/ADRB1/SLC34A1/GRID2/SLC22A12/MUC17/GRIK5/ATP2B3/SNTB1/PDZK1/ATP2B2/SHISA6/LPAR1/SDC2/LNX2/SLC22A4/LNX1/LIN7C/ACOX1/CIT/GNG12/FZD7/LLGL2/CLCN3/PSEN1/PLEKHA1/SLC9A3R1/SHISA9/ACVR2A/TGFBR3/TMEM88/NSF/KIDINS220/SNTA1/FZD3/RAPGEF2/CRIPT/FZD4/PTEN/SLC22A5/SRR/ATP2B1/GIPC1/F11R/NLGN1/CRIM1
GOBP_PHOSPHOLIPID_TRANSPORT	GOBP_PHOSPHOLIPID_TRANSPORT	94	0.462065	1.72042	0.00012374	0.00276015	0.00231042	9535	tags=30%, list=17%, signal=25%	APOA5/APOC3/SLC4A1/APOA1/APOA2/TMEM30B/TNFAIP8L3/ABCA4/ANO4/ABCG8/ATP9A/LDLR/TRPC5/GLTPD2/ATP10D/PRELID3B/PRKCD/ATP8A1/SCP2/XKR4/GLTP/OSBPL8/MTTP/ABCB1/PLEKHA3/TMEM30A/CERT1/CETP
GOBP_REGULATION_OF_CHOLESTEROL_ESTERIFICATION	GOBP_REGULATION_OF_CHOLESTEROL_ESTERIFICATION	13	0.840425	2.13244	0.000125377	0.0027872	0.00233307	337	tags=23%, list=1%, signal=23%	APOA5/APOA1/APOA2
GOMF_SOLUTE_ANION_ANTIPORTER_ACTIVITY	GOMF_SOLUTE_ANION_ANTIPORTER_ACTIVITY	30	0.679116	2.03817	0.000126633	0.00280561	0.00234848	5380	tags=43%, list=9%, signal=39%	SLC26A7/SLC4A1/SLC4A9/SLC22A9/SLC26A3/SLC22A6/SLC26A4/SLC25A5/SLC25A4/SLC4A5/SLC4A11/SLC26A9/SLC4A10
GOBP_FATTY_ACID_DERIVATIVE_METABOLIC_PROCESS	GOBP_FATTY_ACID_DERIVATIVE_METABOLIC_PROCESS	82	0.479963	1.73254	0.0001286	0.0028396	0.00237693	8124	tags=37%, list=14%, signal=31%	GGT6/OXCT1/HMGCS2/TYRP1/CYP4A11/ACAT1/BDH1/ELOVL4/ACSS3/CYP4F2/ACSL1/DGAT2/SCD5/ACSL6/HPGD/SLC27A5/ACSBG1/ELOVL7/HSD17B12/HSD17B8/FITM2/ACSL3/HSD17B4/BDH2/GGTLC1/CBR4/ACSM2A/HACD2/NUDT7/ACSL4
GOBP_CELLULAR_GLUCOSE_HOMEOSTASIS	GOBP_CELLULAR_GLUCOSE_HOMEOSTASIS	144	0.412051	1.63276	0.000130201	0.00285633	0.00239094	7231	tags=22%, list=13%, signal=19%	MIR15A/CFTR/CRH/EPHA5/CYP7A1/CPB2/OXCT1/CASR/PDX1/KCNJ11/FOXA3/PPARGC1A/MIR103A1/GRIK5/TH/GJB6/CLTRN/VSNL1/PCK1/CMA1/PCK2/PRKCE/ENDOG/SELENOT/KLF15/RAB11FIP2/GPR27/PRKAA2/CCDC186/RAB11FIP5/FOXO1/MPC2
GOBP_POSITIVE_REGULATION_OF_TRANSPORTER_ACTIVITY	GOBP_POSITIVE_REGULATION_OF_TRANSPORTER_ACTIVITY	111	0.426029	1.60855	0.000130229	0.00285633	0.00239094	9243	tags=33%, list=16%, signal=28%	LRRC52/CFTR/LRRC38/PON1/SYNGR3/KCNA1/PLCG2/KCNJ11/WNK3/HAP1/STAC2/TRDN/ANK3/ARC/AMIGO1/RGN/CCL2/NIPSNAP2/PDZK1/SGK2/ANK2/TESC/KCNC2/FGF14/GAL/CHP1/PRKCD/ATPSCKMT/PINK1/SGK1/ADRB2/ABCB1/GSTO1/CACNB2/CALM2/AKAP6/COX17
GOBP_RESPONSE_TO_ACID_CHEMICAL	GOBP_RESPONSE_TO_ACID_CHEMICAL	118	0.421544	1.57937	0.000132289	0.00289184	0.00242066	9528	tags=32%, list=17%, signal=27%	GPRC6A/UMOD/AQP2/ARG1/F7/NEURL1/CPS1/SST/PDX1/PPARGC1A/AVPR1A/TH/RRAGD/PCK1/CPEB1/AMIGO1/CDO1/CPEB3/CHUK/LAMTOR3/SH3BP4/CPEB4/SIX1/AKR1B1/SESN3/KRT8/PDGFD/OPA1/NSMF/GSTP1/GCLM/LAMTOR1/ALAD/RRAGA/ATP7A/LAMTOR5/TMBIM6/XBP1
GOBP_ALPHA_AMINO_ACID_BIOSYNTHETIC_PROCESS	GOBP_ALPHA_AMINO_ACID_BIOSYNTHETIC_PROCESS	67	0.5069	1.8186	0.000135418	0.00295041	0.00246968	11337	tags=49%, list=20%, signal=39%	OTC/AGXT/PAH/CPS1/GOT1/SEPHS2/AGXT2/GOT2/PHGDH/PSPHP1/GLUD1/APIP/AASDHPPT/ILVBL/OAT/GLUD2/SDSL/BHMT/ENOPH1/SLC25A12/MTHFD2L/GLS/ASNSD1/NAGS/SHMT1/SDS/DHFRP1/ADI1/PSPH/BHMT2/DHFR/DHFR2/SEPHS1
GOMF_FATTY_ACID_BINDING	GOMF_FATTY_ACID_BINDING	37	0.619551	1.92867	0.000136727	0.00296906	0.0024853	9202	tags=46%, list=16%, signal=39%	ALB/FABP1/AFP/AFM/PTGDS/GSTA1/ACOX2/NDUFAB1/FABP3/PPARG/ACOX1/ADH5/STX3/SCP2/GSTP1/FABP4/DBT
GOCC_ENDOPLASMIC_RETICULUM_PROTEIN_CONTAINING_COMPLEX	GOCC_ENDOPLASMIC_RETICULUM_PROTEIN_CONTAINING_COMPLEX	124	0.418157	1.61034	0.000137659	0.00297942	0.00249397	15564	tags=59%, list=27%, signal=43%	ATP5F1B/HSD17B12/AMFR/SPTLC3/UGT3A1/INSIG1/PIGH/SPTSSA/MMGT1/SPCS1/SEC11C/SRP9/SPCS3/SPTLC2/EMC3/SRPRB/SPCS2/STT3B/EMC6/MAGT1/ALG14/ATP5F1C/PIGA/PIGK/DAD1/B2M/SPTLC1/FAM8A1/ORMDL2/HSPA5/RPN1/SEL1L/ARL6IP1/EMC8/GET3/ZW10/SELENOS/RHBDD2/SREBF2/PIGS/EMC7/ATP5F1E/SDF2L1/RNF139/SEC61B/PDIA6/OSTC/SRPRA/VCP/ELOVL6/STT3A/FAF2/SEC11A/ATP5F1D/UGT1A1/SEC63/EMC4/MAP3K5/PIGP/DNAJC10/SPTSSB/PIGM/HYOU1/TUSC3/EM…
GOBP_ANIMAL_ORGAN_REGENERATION	GOBP_ANIMAL_ORGAN_REGENERATION	73	0.490675	1.80736	0.000138251	0.00298239	0.00249646	6368	tags=18%, list=11%, signal=16%	NR0B2/BAAT/APOA1/CPB2/F7/PDX1/PTPN3/IHH/ANXA3/RGN/NR4A3/PPARG/CPT1A
GOBP_SHORT_CHAIN_FATTY_ACID_METABOLIC_PROCESS	GOBP_SHORT_CHAIN_FATTY_ACID_METABOLIC_PROCESS	17	0.797507	2.13881	0.000138997	0.00298867	0.00250171	9572	tags=76%, list=17%, signal=64%	TYRP1/PHYH/PCCA/PCCB/PCK1/ACOT4/MMUT/PCK2/ACADS/CRAT/ACSS1/MMAA/OXSM
GOCC_OUTER_MITOCHONDRIAL_MEMBRANE_PROTEIN_COMPLEX	GOCC_OUTER_MITOCHONDRIAL_MEMBRANE_PROTEIN_COMPLEX	22	0.726603	2.06798	0.0001414	0.00303039	0.00253664	13912	tags=82%, list=24%, signal=62%	APOO/APOOL/HSPA9/IMMT/MTX2/CHCHD3/TOMM70/SAMM50/MICOS10/TOMM22/TOMM40L/MICOS13/CHCHD6/TOMM5/TOMM20L/MFN1/TOMM20/DNAJC11
GOBP_INTESTINAL_ABSORPTION	GOBP_INTESTINAL_ABSORPTION	39	0.60535	1.90922	0.00014753	0.00315148	0.00263799	6855	tags=46%, list=12%, signal=41%	APOA5/APOA1/CEL/FABP1/VIL1/SLC2A2/SLC5A1/AKR1C1/PLS1/ABCG8/ENPP7/LDLR/EZR/MOGAT2/ACO1/LIMA1/GCNT3/KCNQ1
GOBP_SERINE_FAMILY_AMINO_ACID_METABOLIC_PROCESS	GOBP_SERINE_FAMILY_AMINO_ACID_METABOLIC_PROCESS	43	0.589258	1.95687	0.000149442	0.00318194	0.00266349	11377	tags=56%, list=20%, signal=45%	BAAT/AGXT/DAO/SEPHS2/AGXT2/TST/GLYAT/PHGDH/CDO1/PSPHP1/RIDA/GCLC/SDSL/GLDC/SHMT1/GCLM/SDS/GCAT/DHFRP1/PSPH/DHFR/DHFR2/SEPHS1/GCSH
GOBP_REGULATION_OF_FATTY_ACID_BIOSYNTHETIC_PROCESS	GOBP_REGULATION_OF_FATTY_ACID_BIOSYNTHETIC_PROCESS	54	0.551605	1.89087	0.000150622	0.00319669	0.00267584	2499	tags=13%, list=4%, signal=12%	APOA5/APOC3/APOA1/PLA2G3/CYP7A1/MIR33A/AVPR1A
GOBP_BLOOD_VESSEL_ENDOTHELIAL_CELL_MIGRATION	GOBP_BLOOD_VESSEL_ENDOTHELIAL_CELL_MIGRATION	158	0.381472	1.49621	0.000155054	0.00328015	0.0027457	6118	tags=15%, list=11%, signal=13%	HRG/MIR15A/APOA1/MIR188/MIR200C/FGFBP1/MIR494/MIR329-1/SLIT2/MIR505/MIR200A/MIR200B/ATP5F1A/MIR640/MIR221/ATP5F1B/KLF4/ADTRP/ANGPT1/MIR361/MIR2355/MIR27B/PPARG
GOBP_GPI_ANCHOR_METABOLIC_PROCESS	GOBP_GPI_ANCHOR_METABOLIC_PROCESS	31	0.658457	1.98965	0.00015665	0.00330324	0.00276503	14998	tags=68%, list=26%, signal=50%	CWH43/PIGH/PGAP4/PIGW/PIGO/PIGA/PIGK/PIGX/MPPE1/PIGF/PIGS/DPM1/PIGV/PIGZ/PGAP3/PIGP/PIGM/PIGN/PIGB/PGAP1/PIGU
GOBP_REGULATION_OF_GENE_SILENCING	GOBP_REGULATION_OF_GENE_SILENCING	141	0.398075	1.56224	0.000158032	0.00331583	0.00277556	3821	tags=12%, list=7%, signal=11%	H4C6/H1-5/H4C4/H4C2/H3C11/H3C2/H3C7/H4C1/H1-1/H1-4/H3C3/H4C13/H1-3/H4C3/H3C1/TRIM71/LIN28B
GOBP_NEGATIVE_REGULATION_OF_PROTEIN_BINDING	GOBP_NEGATIVE_REGULATION_OF_PROTEIN_BINDING	96	0.45371	1.69309	0.000158509	0.00331583	0.00277556	3067	tags=7%, list=5%, signal=7%	CFHR5/CFHR2/FRMD7/WFIKKN2/CFHR1/PCSK9/XIRP1
GOBP_SODIUM_ION_HOMEOSTASIS	GOBP_SODIUM_ION_HOMEOSTASIS	54	0.549753	1.88452	0.000158763	0.00331583	0.00277556	5998	tags=35%, list=11%, signal=32%	ATP6V1B1/UMOD/SLC12A3/ATP4B/SLC12A1/ATP12A/SCNN1A/CYP4A11/AVPR1A/TAC1/TFAP2B/ATP4A/NEDD4L/CYP4F2/ATP1A1/SPX/AGTR1/EDNRB/SLC12A2
GOBP_NEGATIVE_REGULATION_OF_STEROL_TRANSPORT	GOBP_NEGATIVE_REGULATION_OF_STEROL_TRANSPORT	23	0.719392	2.0562	0.000160814	0.00334799	0.00280249	2462	tags=26%, list=4%, signal=25%	APOC3/APOA2/MIR130B/EGF/MIR33A/PCSK9
GOBP_AUTOPHAGY_OF_MITOCHONDRION	GOBP_AUTOPHAGY_OF_MITOCHONDRION	75	0.490116	1.78684	0.000164439	0.00341264	0.0028566	13557	tags=44%, list=24%, signal=34%	CTSK/PPARGC1A/GABARAPL1/FZD5/GABARAPL3/CISD2/MUL1/GABARAPL2/SPATA18/PINK1/VDAC1/FBXO7/VPS13D/FIS1/MAP1LC3B/ATG5/MFN2/WIPI1/MAP1LC3A/HIF1A/ATG3/SREBF2/BNIP3/SQSTM1/FUNDC2/FUNDC1/WIPI2/DNM1L/GBA/RB1CC1/WDR45B/ATG9A/HK2
GOBP_VITAMIN_METABOLIC_PROCESS	GOBP_VITAMIN_METABOLIC_PROCESS	130	0.404221	1.56005	0.000165579	0.0034168	0.00286008	9018	tags=42%, list=16%, signal=35%	CYP1A1/GC/TTPA/CYP3A4/CYP11A1/UGT1A4/VNN1/PRSS3/SLC19A2/ALDH1A2/CYP4F2/ACP5/RLBP1/LRP2/PCCA/PCCB/VDR/ALDH1L1/RGN/ACP3/RFK/SLC19A3/MMUT/CUBN/LGMN/CLYBL/CBR1/PC/GSTO2/ENPP1/AMN/AASDHPPT/SLC52A3/LMBRD1/CYB5A/CYP26C1/MCCC2/THTPA/RDH10/FOLR1/MMADHC/CYP27A1/MTHFS/BCO1/TCN1/PNPO/BTD/TPK1/MCCC1/TCN2/GSTO1/MTHFD2L/AOX1/SHMT1
GOBP_RESPONSE_TO_TUMOR_CELL	GOBP_RESPONSE_TO_TUMOR_CELL	28	0.696947	2.05252	0.000165682	0.0034168	0.00286008	3038	tags=18%, list=5%, signal=17%	HRG/PLK5/SLC22A13/IGFBPL1/IL12B
GOBP_MULTI_MULTICELLULAR_ORGANISM_PROCESS	GOBP_MULTI_MULTICELLULAR_ORGANISM_PROCESS	202	0.361065	1.4775	0.0001697	0.0034887	0.00292027	4305	tags=14%, list=8%, signal=13%	CALCA/PSG9/CRH/PSG4/PSG5/AMBP/SLC38A3/ADCYAP1/ARG1/CYP1A1/PRLR/HSD11B2/APELA/SLC6A4/ACVR1C/AVPR1A/CRHBP/TAC1/CLIC5/CLDN4/RLN2/DSG2/FOSB/IHH/EDDM3A/PGR/HPGD/VDR
GOCC_CHITOSOME	GOCC_CHITOSOME	14	0.816135	2.09725	0.000174881	0.00358398	0.00300002	3223	tags=43%, list=6%, signal=40%	TYR/GPR143/TYRP1/GPNMB/SLC45A2/TH
GOCC_PHAGOCYTIC_VESICLE_MEMBRANE	GOCC_PHAGOCYTIC_VESICLE_MEMBRANE	76	0.484823	1.77503	0.00017923	0.00366165	0.00306504	13036	tags=42%, list=23%, signal=32%	ATP6V0A4/ATP6V0D2/ANXA3/ATP6V0B/SYT7/PIP4P2/ATP6V0D1/ATP6V0E2/RAB9A/VAMP8/HLA-G/PIK3R4/RAB11FIP1/ATP6V0E1/B2M/LAMP2/RAB10/ATP7A/RAB32/ATG5/RAB5A/LAMP1/RAB7A/RAB20/ATP6V0A1/PIP4P1/HLA-H/PIKFYVE/HLA-C/HLA-B/PIK3C3/ATP6V0A2
GOBP_TRIGLYCERIDE_CATABOLIC_PROCESS	GOBP_TRIGLYCERIDE_CATABOLIC_PROCESS	38	0.610053	1.90557	0.000180936	0.00368503	0.00308461	6067	tags=29%, list=11%, signal=26%	APOA5/APOC3/APOA1/AADAC/CPS1/FABP1/LIPH/PLIN5/PNPLA4/SORL1/FABP3
GOMF_ION_CHANNEL_BINDING	GOMF_ION_CHANNEL_BINDING	128	0.414674	1.61177	0.000181751	0.00369017	0.00308891	9993	tags=27%, list=18%, signal=22%	LRRC52/LRRC38/KCNE5/RIMS1/DPP10/CASR/KCNJ11/GPD1L/HAP1/KCNE1B/NEDD4L/TRDN/ANK3/HOMER1/ITPR2/ANK2/FGF12/KCNC2/KCNQ1/YES1/FGF13/VDAC1/KCNIP3/SCN5A/RIMS4/HERPUD1/NPTN/CALM2/PPP1R9A/AKAP6/RIMS2/CBARP/DIAPH1/USP10
GOMF_AMINO_ACID_TRANSMEMBRANE_TRANSPORTER_ACTIVITY	GOMF_AMINO_ACID_TRANSMEMBRANE_TRANSPORTER_ACTIVITY	79	0.497797	1.78298	0.00018942	0.00382139	0.00319875	7759	tags=37%, list=14%, signal=32%	SLC38A8/SLC38A3/SLC6A15/SLC36A2/SLC38A4/SLC6A18/SLC7A8/SLC7A3/SLC1A6/SLC6A19/SLC6A20/SLC7A9/SLC6A13/SFXN2/SLC16A10/SLC1A1/SLC17A7/SLC22A2/SLC25A15/SLC1A2/SLC7A7/SLC47A1/SLC6A12/SLC7A13/SLC22A4/SLC3A2/SLC25A44/SLC25A13/SLC43A1
GOBP_PIGMENT_BIOSYNTHETIC_PROCESS	GOBP_PIGMENT_BIOSYNTHETIC_PROCESS	57	0.533168	1.8618	0.000189583	0.00382139	0.00319875	12885	tags=53%, list=23%, signal=41%	PMEL/TYR/GPR143/TYRP1/SLC45A2/DDT/ALAS1/HPRT1/FXN/PGRMC1/FECH/IBA57/CDH3/SHMT1/ALAD/APPL1/SLC25A39/TMEM14C/GMPS/COX10/IREB2/ALAS2/RAPGEF2/HMBS/COX15/PPAT/PAICS/GART/PRPS1/SLC25A38
GOBP_CRISTAE_FORMATION	GOBP_CRISTAE_FORMATION	35	0.622034	1.93998	0.000189962	0.00382139	0.00319875	14124	tags=83%, list=25%, signal=62%	ATP5F1A/APOO/ATP5MC3/ATP5MG/ATP5F1B/ATP5ME/CHCHD10/AFG3L2/APOOL/ATP5PF/ATP5PB/DMAC2L/IMMT/PINK1/ATP5MC1/ATP5PO/ATP5F1C/LETM1/CHCHD3/OMA1/ATP5PD/SAMM50/ATP5F1E/MICOS13/CHCHD6/ADCK1/ATP5F1D/DNAJC11/UQCC3
GOBP_REGULATION_OF_ACTIN_FILAMENT_BUNDLE_ASSEMBLY	GOBP_REGULATION_OF_ACTIN_FILAMENT_BUNDLE_ASSEMBLY	100	0.433582	1.62389	0.000194492	0.00389939	0.00326404	6778	tags=16%, list=12%, signal=14%	APOA1/FRMD7/PPM1E/PFN3/VIL1/WNT11/TACSTD2/SFRP1/TAC1/PFN2/SDC4/RDX/LPAR1/ARHGAP6/MKKS/CGNL1
GOBP_POSITIVE_REGULATION_OF_COAGULATION	GOBP_POSITIVE_REGULATION_OF_COAGULATION	24	0.71123	2.01936	0.000195029	0.00389939	0.00326404	6190	tags=38%, list=11%, signal=33%	HRG/APOH/CPB2/F7/PLG/ST3GAL4/ENPP4/PRDX2/F12
GOBP_KIDNEY_EPITHELIUM_DEVELOPMENT	GOBP_KIDNEY_EPITHELIUM_DEVELOPMENT	131	0.408776	1.60595	0.000198915	0.00395092	0.00330718	9775	tags=37%, list=17%, signal=30%	UMOD/CALB1/BMP7/NPHS2/CER1/SLIT2/GPC3/SOX8/WNT11/IRX1/TACSTD2/KLHL3/SFRP1/FOXJ1/SIX4/TFAP2B/NPHS1/CAT/ARG2/NPNT/LGR4/LHX1/PBX1/SOX9/SDC4/FGF1/ADAMTS16/KLF15/MTSS1/FOXC1/SDC1/EPHA4/SIX1/FMN1/AGTR2/BMP2/PROM1/SHH/SALL1/WNT9B/AGT/RARB/SMAD5/MAGI2/AQP11/CD24/BCL2/SMAD4
GOMF_POTASSIUM_CHANNEL_REGULATOR_ACTIVITY	GOMF_POTASSIUM_CHANNEL_REGULATOR_ACTIVITY	53	0.554276	1.88455	0.0001991	0.00395092	0.00330718	5266	tags=25%, list=9%, signal=22%	LRRC52/LRRC38/KCNE5/DPP10/DPP6/KCNV1/WNK3/KCNE1B/NEDD4L/KCNMB2/KCNIP1/AMIGO1/SGK2
GOBP_AMINE_TRANSPORT	GOBP_AMINE_TRANSPORT	94	0.454056	1.6906	0.000199414	0.00395092	0.00330718	5172	tags=22%, list=9%, signal=20%	RHCG/CRH/SYT10/SLC38A3/ARG1/SLC18A2/CCK/SYT9/AVPR1A/SYT17/CHRNA4/DDC/TH/SYT8/ACE2/CLTRN/SLC22A16/KCNA2/SYT3/SYT7/SLC22A2
GOBP_POSITIVE_REGULATION_OF_INSULIN_SECRETION	GOBP_POSITIVE_REGULATION_OF_INSULIN_SECRETION	71	0.488861	1.77741	0.000207985	0.00410833	0.00343894	1989	tags=14%, list=3%, signal=14%	NR0B2/NKX6-1/CFTR/CRH/OXCT1/MYRIP/RBP4/PFKFB2/CASR/PDX1
GOBP_NEGATIVE_REGULATION_OF_PLASMA_MEMBRANE_BOUNDED_CELL_PROJECTION_ASSEMBLY	GOBP_NEGATIVE_REGULATION_OF_PLASMA_MEMBRANE_BOUNDED_CELL_PROJECTION_ASSEMBLY	30	0.667025	2.00189	0.000213041	0.00419557	0.00351196	3255	tags=20%, list=6%, signal=19%	HRG/STAP1/SLIT2/TACSTD2/PFN2/RAP1GAP
GOBP_MITOCHONDRIAL_RNA_METABOLIC_PROCESS	GOBP_MITOCHONDRIAL_RNA_METABOLIC_PROCESS	47	0.557615	1.84758	0.000215314	0.00422763	0.0035388	14144	tags=62%, list=25%, signal=46%	SLC25A33/PDE12/FASTKD5/CHCHD10/TRMT10C/TFAM/GRSF1/FASTKD1/LRPPRC/EARS2/TRMT61B/TFB2M/TRNT1/DARS2/MTRES1/PRORP/PNPT1/PRKAA1/TRMT5/WARS2/MRPL12/TWNK/TRMT10A/MTERF1/METTL4/HSD17B10/TEFM/TFB1M/MTO1
GOBP_TRANSEPITHELIAL_TRANSPORT	GOBP_TRANSEPITHELIAL_TRANSPORT	30	0.665537	1.99742	0.000216812	0.00424433	0.00355278	7007	tags=40%, list=12%, signal=35%	RHCG/RHBG/CFTR/CLDN19/SLC5A1/SLC1A1/SLC1A2/EDNRB/SLC12A2/AQP1/CLDN3/ABCG2
GOBP_PHOSPHATIDYLINOSITOL_METABOLIC_PROCESS	GOBP_PHOSPHATIDYLINOSITOL_METABOLIC_PROCESS	185	0.35654	1.48202	0.000219125	0.00425686	0.00356327	11505	tags=33%, list=20%, signal=26%	PLA2G4F/INPP5J/PIK3C2G/CWH43/PLA2G3/PLCG2/P3R3URF/CDS1/PIP5K1B/HTR2C/IMPA2/CISH/SACM1L/PIGH/PIP4P2/PGAP4/PIGW/SOCS4/PLCH2/IP6K3/SOCS2/PIP4K2C/MTM1/PLA2G12A/MTMR6/PIGO/FAM126B/RAB14/PIK3R4/PLA2G4A/SOCS6/PIK3C2A/PLEKHA3/TTC7B/PIGA/BPNT1/PI4K2B/SH3YL1/PIGK/BPNT2/PLCD4/PLEKHA1/IMPA1/MTMR12/PIGX/MPPE1/LCLAT1/MTMR9/RAB5A/PIK3CA/PIK3R3/PIGF/PIGS/MTMR10/DPM1/INPP1/RAB4A/INPP4B/PTPN13/EFR3B/PIK3CB
GOBP_CELLULAR_RESPONSE_TO_TOXIC_SUBSTANCE	GOBP_CELLULAR_RESPONSE_TO_TOXIC_SUBSTANCE	119	0.410886	1.56461	0.000219526	0.00425686	0.00356327	11264	tags=41%, list=20%, signal=33%	ADH4/ALB/BMP7/FABP1/RDH12/IYD/DUOX2/NNT/APOM/CAT/RDH11/HP/GSTA1/ABTB2/PRDX2/GSTO2/PRDX3/SELENOT/KCNC2/GSTZ1/TXNDC2/FANCC/HBG1/MTARC2/ABCG2/ADH5/PINK1/GPX3/MGST2/GSTO1/CD36/PRDX5/GSTP1/PPP1R9A/GSTM3/NFE2L2/ATP7A/HBB/IPCEF1/DHFRP1/GSR/TXNRD3/MGST3/SELENOS/GCH1/TXNRD2/TXN/DHFR/UBIAD1
GOBP_REGULATION_OF_TRIGLYCERIDE_METABOLIC_PROCESS	GOBP_REGULATION_OF_TRIGLYCERIDE_METABOLIC_PROCESS	38	0.605485	1.8913	0.00021994	0.00425686	0.00356327	5746	tags=29%, list=10%, signal=26%	APOA5/APOC3/APOA1/THRSP/AADAC/DGAT2/PLIN5/RGN/LDLR/FITM2/SORL1
GOBP_PROTEIN_STABILIZATION	GOBP_PROTEIN_STABILIZATION	190	0.355567	1.47174	0.000220048	0.00425686	0.00356327	13976	tags=47%, list=25%, signal=35%	APOA1/APOA2/H1-5/PPARGC1A/USP2/PFN2/GBA3/AFM/A1CF/BAG1/ANK2/HSP90AA1/CDC37L1/TESC/MUL1/RTN4/PLPP3/TSPAN1/EPHA4/HSPD1/CHP1/STXBP1/PRKCD/PDCD10/SAV1/PINK1/RABL3/NAA15/BAG5/SAXO1/PHB/STK3/NAPG/HSP90AB3P/NLK/LAMP2/RAB21/UBE2B/SUMO1/GOLGA7/IGF1/MARCHF7/WFS1/USP9X/BAG3/MTMR9/PEX19/SEL1L/LAMP1/CLU/USP7/TAF9/TRIM44/MFSD1/TMEM88/CREBL2/ZSWIM7/CCT4/TBL1X/CCT6A/BAG4/STX12/CCT2/CAMLG/PIK3R1/PDCL3/PTEN/PTGES3…
GOBP_OLEFINIC_COMPOUND_METABOLIC_PROCESS	GOBP_OLEFINIC_COMPOUND_METABOLIC_PROCESS	119	0.409906	1.56088	0.000227707	0.00439206	0.00367644	9013	tags=34%, list=16%, signal=29%	CYP2A6/CYP17A1/CYP1A2/CYP2A7/AKR1C4/CYP1A1/CYP11A1/CYP2B6/CYP4A22/PPARGC1A/CYP4A11/ALDH8A1/ALDH1A2/AKR1C1/CYP4F2/ACSL1/PTGDS/RDH11/PNPLA8/GSTA1/CBR1/FSHB/SRD5A2/HSD17B4/CYP2C18/CYP2J2/EPHX2/ACOX1/PTGES2/SCP2/RDH10/BMP2/FAAH2/BCO1/PLA2G4A/ALOXE3/CYP2E1/BMP5/GSTP1/DHRS9/BCO2
GOBP_ASPARTATE_FAMILY_AMINO_ACID_METABOLIC_PROCESS	GOBP_ASPARTATE_FAMILY_AMINO_ACID_METABOLIC_PROCESS	50	0.559138	1.8845	0.0002312	0.00444637	0.0037219	11270	tags=62%, list=20%, signal=50%	GNMT/SLC25A21/CRYM/GOT1/DLD/MSRA/ASRGL1/GOT2/DDO/PHGDH/APIP/RIDA/AASDHPPT/OGDH/SDSL/BHMT/DLST/ENOPH1/MAT1A/MTHFD2L/ASNSD1/ALDH7A1/SDS/ADSS2/GCAT/GCDH/AADAT/SMS/ADI1/BHMT2/HYKK
GOBP_NADH_DEHYDROGENASE_COMPLEX_ASSEMBLY	GOBP_NADH_DEHYDROGENASE_COMPLEX_ASSEMBLY	65	0.519671	1.82618	0.000235474	0.00451532	0.00377962	14244	tags=71%, list=25%, signal=53%	NDUFS1/NDUFAF4/NDUFB6/NDUFB5/NDUFC2/NDUFAB1/NDUFB2/NDUFA6/DMAC1/NDUFB1/NDUFA5/NDUFB3/NDUFAF5/NDUFB9/NDUFA9/NDUFA8/TMEM126A/NDUFS4/TMEM126B/NUBPL/TIMM21/NDUFS3/NDUFAF1/NDUFS6/NDUFC1/NDUFA10/NDUFV1/TIMMDC1/NDUFB7/ECSIT/NDUFA2/NDUFS8/NDUFA1/NDUFS2/NDUFB10/NDUFB11/NDUFB4/NDUFS7/NDUFB8/NDUFA12/ACAD9/FOXRED1/DMAC2/NDUFAF2/NDUFA11/NDUFA3
GOBP_ISOPRENOID_BIOSYNTHETIC_PROCESS	GOBP_ISOPRENOID_BIOSYNTHETIC_PROCESS	28	0.686126	2.02065	0.000236264	0.00451725	0.00378123	8999	tags=54%, list=16%, signal=45%	CYP1A1/HMGCS2/ALDH8A1/ALDH1A2/IDI1/PDSS2/HMGCS1/HMGCR/COQ2/RDH10/CRPPA/BCO1/PDSS1/DHRS9/NUS1
GOBP_RENAL_WATER_HOMEOSTASIS	GOBP_RENAL_WATER_HOMEOSTASIS	38	0.601216	1.87797	0.000250426	0.00477411	0.00399624	9825	tags=50%, list=17%, signal=41%	ATP6V1B1/UMOD/AQP2/CYP4A11/TFAP2B/CYP4F2/MYO5B/AQP1/RAB11FIP2/PRKAR1A/AKR1B1/ADCY1/PRKACB/AQP4/RAB11A/ADCY5/PRKAR2A/ADCY9/WFS1
GOMF_IRON_ION_BINDING	GOMF_IRON_ION_BINDING	150	0.38819	1.53613	0.00025157	0.00478201	0.00400285	3928	tags=17%, list=7%, signal=16%	CYP2A6/CYP17A1/CYP1A2/CYP2A7/CYP7A1/PAH/CYP1A1/FA2H/LCN2/CYP3A4/CYP11A1/CYP2B6/CYP4A22/CYP4A11/SC5D/MIOX/TH/CYP4F2/FDX1/ACP5/PHYH/CYP39A1/CYP3A7/BBOX1/SCD5
GOMF_HYDRO_LYASE_ACTIVITY	GOMF_HYDRO_LYASE_ACTIVITY	64	0.511191	1.79249	0.000260604	0.00493456	0.00413054	9334	tags=44%, list=16%, signal=37%	CA10/CYP1A2/CYP1A1/CA2/HACD3/AUH/CA4/EHHADH/CA3/ACO2/FH/ENO3/ECHDC3/ACO1/HADHB/APIP/HSD17B4/PCBD1/CA5A/ECHDC1/HADHA/HACD2/ALOXE3/ECHS1/ECI1/DGLUCY/CA13/ALAD
GOBP_CHLORIDE_TRANSPORT	GOBP_CHLORIDE_TRANSPORT	109	0.412167	1.53606	0.0002611	0.00493456	0.00413054	5380	tags=20%, list=9%, signal=18%	BSND/SLC26A7/CLCNKB/CFTR/SLC4A1/CLCNKA/SLC12A3/ANO5/SLC12A1/SLC26A3/SLC26A4/CASR/CLIC5/ANO4/CLDN4/GABRA2/SLC1A1/CLCN5/GABRG1/GABRB3/SLC26A9/SLC4A10
GOBP_REGULATION_OF_FIBRINOLYSIS	GOBP_REGULATION_OF_FIBRINOLYSIS	14	0.805196	2.06914	0.000263009	0.00495636	0.0041488	1836	tags=36%, list=3%, signal=35%	HRG/APOH/CPB2/F11/PLG
GOBP_ACETYL_COA_BIOSYNTHETIC_PROCESS	GOBP_ACETYL_COA_BIOSYNTHETIC_PROCESS	22	0.712808	2.02872	0.000264483	0.00496986	0.0041601	11050	tags=73%, list=19%, signal=59%	ACAT1/DLD/PDP1/DLAT/PDHA1/PDP2/GSTZ1/PDHX/PDHB/MPC2/ACSS1/MLYCD/PDK2/PDK4/PPCS/ACLY
GOBP_MITOCHONDRIAL_ELECTRON_TRANSPORT_NADH_TO_UBIQUINONE	GOBP_MITOCHONDRIAL_ELECTRON_TRANSPORT_NADH_TO_UBIQUINONE	55	0.540785	1.87055	0.000272611	0.00510795	0.00427569	13159	tags=71%, list=23%, signal=55%	NDUFC2-KCTD14/NDUFA4/NDUFS1/DLD/NDUFB6/NDUFB5/NDUFC2/NDUFAB1/COQ9/NDUFB2/NDUFA6/NDUFB1/NDUFA5/NDUFB3/NDUFB9/NDUFA9/ISCU/PINK1/NDUFA8/NDUFS4/NDUFS3/NDUFAF1/NDUFS6/NDUFC1/NDUFA10/NDUFV1/NDUFB7/NDUFA2/NDUFS8/SNCA/NDUFA1/DNAJC15/NDUFS2/NDUFB10/NDUFB11/NDUFB4/NDUFS7/NDUFB8/NDUFA12
GOBP_REGULATION_OF_CELL_PROJECTION_ASSEMBLY	GOBP_REGULATION_OF_CELL_PROJECTION_ASSEMBLY	185	0.353072	1.46761	0.000280735	0.00524518	0.00439056	12116	tags=32%, list=21%, signal=25%	HRG/STAP1/FRMD7/KIT/NEURL1/OCLN/SLIT2/TACSTD2/HAP1/PFN2/RAP1GAP/GPM6A/COBL/CCDC151/KLF5/FAM110C/F2RL1/TWF1/AKIRIN1/ADAMTS16/RDX/ARHGAP24/EPS8/EVI5L/RAB17/PRKCD/WASL/USP17L2/PLEK2/NCKAP1/SAXO1/EPHA2/CDKL1/MYO10/DMTN/SRF/PPP1R9A/ATP7A/ATG5/ARF6/RAB5A/FNBP1L/FAM98A/PIK3CA/ATG3/DYNC2LI1/ATMIN/VDAC3/RHOQ/TAPT1/PODXL/RALA/FMR1/ACTR2/CDC42/APC/IFT88/CDC42EP4/ABITRAM
GOCC_POTASSIUM_CHANNEL_COMPLEX	GOCC_POTASSIUM_CHANNEL_COMPLEX	99	0.4331	1.63321	0.000281557	0.00524559	0.0043909	4853	tags=20%, list=9%, signal=19%	LRRC52/LRRC38/KCNE5/KCNG3/HCN2/DPP10/KCNJ1/KCNA1/DPP6/KCNJ11/CNTNAP2/KCNV1/GRIK5/DLG2/KCNE1B/KCNMB2/KCNIP1/AMIGO1/KCNMA1/KCNA2
GOCC_TRIGLYCERIDE_RICH_PLASMA_LIPOPROTEIN_PARTICLE	GOCC_TRIGLYCERIDE_RICH_PLASMA_LIPOPROTEIN_PARTICLE	20	0.738238	2.09486	0.000285987	0.0052778	0.00441786	360	tags=25%, list=1%, signal=25%	APOA5/APOC3/APOA1/APOA2/APOH
GOCC_INTRINSIC_COMPONENT_OF_ENDOPLASMIC_RETICULUM_MEMBRANE	GOCC_INTRINSIC_COMPONENT_OF_ENDOPLASMIC_RETICULUM_MEMBRANE	163	0.373367	1.46625	0.000286183	0.0052778	0.00441786	15564	tags=55%, list=27%, signal=40%	G6PC/ELOVL4/SLC27A2/RETREG1/DGAT2/HACD3/RNF180/SLC27A5/TM7SF2/TMEM33/SGMS2/ELOVL7/AMFR/FITM2/DHCR7/INSIG1/RTN4/MMGT1/SGMS1/SPCS1/FICD/DOLK/HLA-G/ZMPSTE24/KTN1/HACD2/EMC3/CYP2E1/EMC6/EIF2AK3/SPPL2A/DHRS9/PIGK/B2M/SEC62/HSPA5/WFS1/TRAM1/HLA-DQA2/SLC35B4/TRAM1L1/ARL6IP1/EMC8/SELENOS/RHBDD2/SREBF2/PIGS/EMC7/CANX/TAPT1/SARAF/STIM1/DOLPP1/SLC35B1/PREB/LNPK/TMCO1/HLA-H/HLA-C/SLC35B2/ELOVL6/BNIP1/RHBDD1/…
GOBP_REGULATION_OF_ACTIN_FILAMENT_ORGANIZATION	GOBP_REGULATION_OF_ACTIN_FILAMENT_ORGANIZATION	269	0.329307	1.44508	0.000286384	0.0052778	0.00441786	12292	tags=31%, list=22%, signal=24%	APOA1/CTNNA2/FRMD7/CAPZA3/PPM1E/PFN3/SCIN/VIL1/SPTBN2/CSF3/SLIT2/WNT11/TACSTD2/SFRP1/TAC1/PFN2/NPHS1/DNAI3/IQGAP2/GMFB/CYFIP2/CFL2/PRKCE/F2RL1/TWF1/SDC4/TMSB15A/RDX/LPAR1/ARHGAP6/CAPZA2/LIMA1/MKKS/CGNL1/EPS8/AP1AR/FMN1/ARHGAP40/PRKCD/WASL/NCKAP1/BIN1/ADD3/BAIAP2/ARHGAP18/DSTN/LIMCH1/DMTN/JMY/PPP1R9A/ARFIP1/NOX4/CX3CL1/ARF6/CARMIL1/SEMA5A/SPTBN4/PIK3CA/TMSB4Y/ARFGEF1/MYADM/RGCC/WASF3/SPTBN1/WDR1/R…
GOCC_CLATHRIN_COATED_VESICLE	GOCC_CLATHRIN_COATED_VESICLE	190	0.351115	1.45331	0.000286504	0.0052778	0.00441786	8379	tags=23%, list=15%, signal=20%	CFTR/SFTPB/SH3GL2/SLC18A2/EPN3/TYRP1/EGF/SFTPC/CPNE6/ASTN1/SFTA3/SYT9/EREG/SLC2A4/BTC/AP1M2/LRP2/STEAP2/CD9/ASTN2/SLC17A7/LDLR/FZD5/CLVS2/NCALD/MYO6/SCAMP1/HSPA8/AFTPH/VPS18/SH3BP4/VAMP8/SNAP91/DENND1B/SLC2A8/SCYL2/CLINT1/FOLR1/RAB14/ADRB2/AP1G1/CLTC/CD207/PIK3C2A
GOMF_KINASE_INHIBITOR_ACTIVITY	GOMF_KINASE_INHIBITOR_ACTIVITY	73	0.476249	1.75422	0.00028785	0.00528772	0.00442617	10996	tags=30%, list=19%, signal=24%	AHSG/PPP1R1B/PKIA/GMFB/TESC/GSKIP/PKIB/MAPK8IP1/PRKAR1A/CHP1/MBIP/CIT/PRKAG2/SFN/CAMK2N1/DNAJC3/TRIB1/IBTK/PRKAR2A/SPRY2/YWHAB/SNCA
GOMF_POTASSIUM_ION_BINDING	GOMF_POTASSIUM_ION_BINDING	11	0.852972	2.11165	0.000289861	0.00530981	0.00444465	4303	tags=36%, list=8%, signal=34%	KCNJ11/ACAT1/PKLR/ATP1A1
GOBP_ERAD_PATHWAY	GOBP_ERAD_PATHWAY	101	0.424969	1.60537	0.000299186	0.00546535	0.00457485	15729	tags=59%, list=28%, signal=43%	UMOD/FBXO2/DNAJB9/SVIP/MAN1A1/AMFR/DNAJB14/TMEM129/HERPUD1/CCDC47/UBQLN1/STT3B/NFE2L2/AQP11/USP14/ERLIN2/HSPA5/WFS1/YOD1/RNF103/JKAMP/RNF185/TRIM13/SEL1L/ERLEC1/SELENOS/RNF5/RHBDD2/STUB1/TOR1A/PSMC6/FOXRED2/SDF2L1/RNF139/RNF121/SEC61B/ERLIN1/UBQLN2/UBXN4/VCP/USP25/RHBDD1/FAF2/SGTB/UBXN8/USP19/EDEM3/BCAP31/DNAJC10/FBXO27/UGGT1/UBE2J1/UBE4A/RNFT1/DNAJB2/DERL2/UGGT2/MARCHF6/ECPAS/POMT2
GOBP_CALCIUM_INDEPENDENT_CELL_CELL_ADHESION_VIA_PLASMA_MEMBRANE_CELL_ADHESION_MOLECULES	GOBP_CALCIUM_INDEPENDENT_CELL_CELL_ADHESION_VIA_PLASMA_MEMBRANE_CELL_ADHESION_MOLECULES	22	0.708351	2.01603	0.000307194	0.00559606	0.00468427	10182	tags=68%, list=18%, signal=56%	CLDN8/CLDN6/CLDN19/CLDN4/CLDN16/CLDN7/CLDN10/CLDN3/CLDN23/BMP2/CLDN14/CX3CL1/CLDN2/CLDN12/CLDN17
GOBP_UBIQUITIN_DEPENDENT_ERAD_PATHWAY	GOBP_UBIQUITIN_DEPENDENT_ERAD_PATHWAY	79	0.483862	1.73307	0.000310794	0.00564594	0.00472602	15647	tags=62%, list=28%, signal=45%	UMOD/FBXO2/DNAJB9/SVIP/MAN1A1/AMFR/DNAJB14/TMEM129/HERPUD1/CCDC47/UBQLN1/STT3B/NFE2L2/USP14/ERLIN2/HSPA5/WFS1/YOD1/RNF103/JKAMP/RNF185/TRIM13/SEL1L/SELENOS/RNF5/RHBDD2/STUB1/PSMC6/FOXRED2/RNF121/SEC61B/ERLIN1/UBQLN2/UBXN4/VCP/FAF2/SGTB/UBXN8/USP19/EDEM3/BCAP31/DNAJC10/FBXO27/UBE2J1/UBE4A/DNAJB2/DERL2/MARCHF6/ECPAS
GOBP_PROTEIN_LIPID_COMPLEX_ASSEMBLY	GOBP_PROTEIN_LIPID_COMPLEX_ASSEMBLY	34	0.632829	1.95633	0.000312341	0.00565839	0.00473644	615	tags=15%, list=1%, signal=15%	APOA5/APOC3/APOA1/APOA2/SH3GL2
GOMF_UDP_GLYCOSYLTRANSFERASE_ACTIVITY	GOMF_UDP_GLYCOSYLTRANSFERASE_ACTIVITY	144	0.395728	1.56808	0.000316586	0.00571948	0.00478758	9206	tags=28%, list=16%, signal=23%	UGT2B10/UGT2B15/UGT2B4/GALNT17/UGT1A4/B4GALNT2/GALNTL6/UGT2B28/UGT8/B4GALNT3/B4GALT6/GYS2/UGT1A9/LARGE2/HYAL1/B3GNT3/GALNT11/UGT3A1/UGT1A7/B3GNT10/PIGH/GYG1/GCNT3/ABO/B3GALNT1/UGT2A1/UGT2A3/B3GNT2/B3GNT8/B4GALNT1/POMGNT2/UGT1A6/GALNT12/GCNT1/MGAT2/ALG5/B3GALT1/GCNT4/PIGA/GALNT3
GOMF_CHANNEL_REGULATOR_ACTIVITY	GOMF_CHANNEL_REGULATOR_ACTIVITY	144	0.395566	1.56744	0.000323906	0.00583565	0.00488482	4653	tags=15%, list=8%, signal=13%	BSND/LRRC52/CFTR/LRRC38/FXYD4/AMBP/KCNE5/DPP10/DPP6/SCN2B/PCSK9/GPD1L/KCNV1/WNK3/KCNE1B/NEDD4L/KCNMB2/PTPN3/PRSS8/KCNIP1/AMIGO1
GOBP_POSITIVE_REGULATION_OF_RESPONSE_TO_BIOTIC_STIMULUS	GOBP_POSITIVE_REGULATION_OF_RESPONSE_TO_BIOTIC_STIMULUS	253	0.324286	1.38699	0.000339882	0.0061067	0.0051117	3905	tags=8%, list=7%, signal=7%	HRG/PGC/CLNK/MUCL1/ARG1/COCH/HPX/PLCG2/MIR520B/KLK7/MUC20/SLC22A13/EREG/MUC17/MUC15/IL12B/MUC7/MUC2/IL17F/MMP12
GOBP_NEGATIVE_REGULATION_OF_CELLULAR_RESPONSE_TO_GROWTH_FACTOR_STIMULUS	GOBP_NEGATIVE_REGULATION_OF_CELLULAR_RESPONSE_TO_GROWTH_FACTOR_STIMULUS	107	0.413581	1.55141	0.000345736	0.0061949	0.00518554	6249	tags=20%, list=11%, signal=18%	HRG/MIR15A/CNMD/SOSTDC1/MIR200C/VWC2/CER1/SOST/MIR329-1/SLIT2/SFRP1/SHISA2/IL12B/LRP2/CADM4/BAMBI/RBPMS2/SORL1/PPM1A/PPARG/TOB1
GOCC_ACTIN_BASED_CELL_PROJECTION	GOCC_ACTIN_BASED_CELL_PROJECTION	215	0.336537	1.38074	0.000351754	0.00628142	0.00525796	9545	tags=28%, list=17%, signal=24%	PVALB/AQP5/ATP6V1B1/CALB1/MUC20/VIL1/SLC7A8/MYO7B/CA2/ATP6V1A/MYO3B/TSPEAR/GPM6A/ADGRV1/ANKS4B/DPEP1/PLS1/KIF13B/IQGAP2/ACP3/ENPP7/PDZK1/CIB2/ITGA6/CDHR2/MYO6/KITLG/PDPN/CEACAM1/ANGPT1/TWF1/EZR/DCXR/RDX/ESPN/SLC27A4/MYO1H/ATP6V1E1/EPS8/CLIC4/EPHA4/MTM1/S100P/AKR1B1/HLA-G/FZD9/PROM1/FGF13/STARD10/TRPV4/CLCA1/SHTN1/BAIAP2/MTTP/HOMER2/MYO10/MPP1/PPP1R9A/ATP7A/SLC9A3R1/VCAM1
GOBP_C4_DICARBOXYLATE_TRANSPORT	GOBP_C4_DICARBOXYLATE_TRANSPORT	24	0.693404	1.96874	0.00035248	0.00628142	0.00525796	12155	tags=67%, list=21%, signal=52%	SLC13A2/SLC1A6/SLC1A1/SLC1A2/SLC12A2/SLC13A3/SLC13A5/SLC25A13/SLC25A11/SLC25A30/SLC25A12/SLC25A18/LRRC8D/NTSR1/SLC25A10/LRRC8A
GOMF_QUATERNARY_AMMONIUM_GROUP_BINDING	GOMF_QUATERNARY_AMMONIUM_GROUP_BINDING	31	0.63922	1.93152	0.000356323	0.00633269	0.00530088	2089	tags=13%, list=4%, signal=12%	APOA5/APOA1/APOA2/SERPINA5
GOBP_RESPONSE_TO_ORGANOPHOSPHORUS	GOBP_RESPONSE_TO_ORGANOPHOSPHORUS	129	0.385238	1.49484	0.000369382	0.00654705	0.00548031	6855	tags=21%, list=12%, signal=18%	CFTR/DNTT/AGXT/TYR/HCN2/CPS1/SLC26A3/DUOX2/KCNJ11/SLC6A4/CRHBP/PKLR/AKR1C1/FDX1/FOSB/PCK1/GPD1/REN/CIB2/ITPR2/HCN4/EZR/CDO1/LPAR1/AQP1/SDC1/KCNQ1
GOBP_CELLULAR_AMINO_ACID_BIOSYNTHETIC_PROCESS	GOBP_CELLULAR_AMINO_ACID_BIOSYNTHETIC_PROCESS	77	0.461616	1.67511	0.000373409	0.00660058	0.00552511	11287	tags=43%, list=20%, signal=34%	OTC/AGXT/NAT8L/PAH/GOT1/AGXT2/GOT2/GPT2/PHGDH/PSPHP1/GLUD1/APIP/AASDHPPT/ILVBL/OAT/GLUD2/BHMT/UPB1/ENOPH1/GPT/SLC25A12/MTHFD2L/GLS/ASNSD1/NAGS/SHMT1/RIMKLA/DHFRP1/ADI1/PSPH/BHMT2/DHFR/DHFR2
GOBP_NUCLEOBASE_METABOLIC_PROCESS	GOBP_NUCLEOBASE_METABOLIC_PROCESS	34	0.628332	1.94243	0.000375202	0.00660231	0.00552656	13499	tags=62%, list=24%, signal=47%	TTR/CPS1/URAD/GMPR/GDA/ALDH6A1/ACP3/HPRT1/CTPS1/SHMT1/MAPK1/UMPS/GMPS/CMPK1/XDH/PPAT/PAICS/GART/PRPS1/GMPR2/DPYS
GOBP_NEGATIVE_REGULATION_OF_BLOOD_VESSEL_ENDOTHELIAL_CELL_MIGRATION	GOBP_NEGATIVE_REGULATION_OF_BLOOD_VESSEL_ENDOTHELIAL_CELL_MIGRATION	67	0.488625	1.75304	0.000375535	0.00660231	0.00552656	6118	tags=21%, list=11%, signal=19%	HRG/MIR15A/MIR188/MIR200C/MIR494/MIR329-1/MIR505/MIR200B/MIR640/MIR221/KLF4/MIR361/MIR2355/PPARG
GOBP_L_AMINO_ACID_TRANSPORT	GOBP_L_AMINO_ACID_TRANSPORT	64	0.502867	1.7633	0.000377475	0.00660231	0.00552656	10617	tags=48%, list=19%, signal=39%	SLC38A3/SLC36A2/ARG1/SLC7A8/SLC7A3/SLC1A6/GRM1/ACE2/CLTRN/SLC6A20/SLC7A9/KCNJ10/SLC1A1/SLC17A7/SLC22A2/SLC25A15/SLC1A2/SLC7A7/SLC47A1/SLC7A13/SLC3A2/SLC25A13/SLC43A1/CLN8/SLC25A12/SLC43A2/PSEN1/SLC25A18/SFXN1/ARL6IP1/ARL6IP5
GOBP_POSITIVE_REGULATION_OF_FATTY_ACID_BIOSYNTHETIC_PROCESS	GOBP_POSITIVE_REGULATION_OF_FATTY_ACID_BIOSYNTHETIC_PROCESS	23	0.700427	2.00199	0.000377534	0.00660231	0.00552656	2499	tags=17%, list=4%, signal=17%	APOA5/APOA1/PLA2G3/AVPR1A
GOBP_WATER_SOLUBLE_VITAMIN_METABOLIC_PROCESS	GOBP_WATER_SOLUBLE_VITAMIN_METABOLIC_PROCESS	84	0.469127	1.68436	0.000381746	0.00665822	0.00557337	11503	tags=52%, list=20%, signal=42%	VNN1/PRSS3/SLC19A2/ACP5/PCCA/PCCB/ALDH1L1/RGN/ACP3/RFK/SLC19A3/MMUT/CUBN/CLYBL/PC/GSTO2/ENPP1/AMN/AASDHPPT/SLC52A3/LMBRD1/CYB5A/MCCC2/THTPA/FOLR1/MMADHC/MTHFS/TCN1/PNPO/BTD/TPK1/MCCC1/TCN2/GSTO1/MTHFD2L/AOX1/SHMT1/MMAA/SLC23A1/DHFRP1/PDXP/DHFR/DHFR2/SLC46A1
GOBP_VERY_LONG_CHAIN_FATTY_ACID_METABOLIC_PROCESS	GOBP_VERY_LONG_CHAIN_FATTY_ACID_METABOLIC_PROCESS	34	0.627544	1.93999	0.000383059	0.00666341	0.00557771	8629	tags=59%, list=15%, signal=50%	ELOVL4/CYP4F2/TECRL/SLC27A2/ACOT1/ACSL1/ACSL6/HACD3/SLC27A5/ACSBG1/ACOT4/ELOVL7/ABCD3/ACOX2/ACOT2/SLC27A4/HSD17B4/ACOX1/HACD2/PEX2
GOBP_RESPONSE_TO_ANTIBIOTIC	GOBP_RESPONSE_TO_ANTIBIOTIC	43	0.568163	1.88682	0.000386792	0.00671054	0.00561716	12459	tags=37%, list=22%, signal=29%	PLA2G4F/CYP1A1/HYAL1/ENDOG/HSP90AA1/AOC1/CPT1A/PPP2CB/PLA2G4A/ATP7A/HSPA5/RSRC1/CYB5R4/ACTR2/SOD1/GJB2
GOCC_OUTER_MEMBRANE	GOCC_OUTER_MEMBRANE	221	0.342466	1.43223	0.000390196	0.00674482	0.00564586	12205	tags=42%, list=21%, signal=33%	ARG1/NEU4/DAO/UGT2B28/MGARP/ACSL1/GK/ACSL6/PGR/SYNE4/BCL2L10/APOO/ATP5MC3/NIPSNAP2/RTN4IP1/SYNJ2BP/DHCR7/HADHB/BPHL/ACSL3/APOOL/CISD2/HSPA9/CPT1A/MUL1/CISD1/RAB11FIP5/MTARC2/EPHA4/PGRMC1/CYB5A/PMAIP1/BOK/MARCHF5/IMMT/SLC25A46/SPATA18/PINK1/STARD7/VDAC1/LRPPRC/ACSL4/MOAP1/PHB/OPA1/GPAM/UBB/MTX2/ARMCX3/FIS1/CHCHD3/AGPAT5/SLC44A1/RETSAT/RMDN3/TOMM70/PSEN1/RAB32/BCL2/PGAM5/MFN2/MIEF1/TOMM34/VDAC2/RNF…
GOMF_ION_CHANNEL_REGULATOR_ACTIVITY	GOMF_ION_CHANNEL_REGULATOR_ACTIVITY	116	0.395724	1.49681	0.000390825	0.00674482	0.00564586	3549	tags=12%, list=6%, signal=11%	LRRC52/CFTR/LRRC38/FXYD4/AMBP/KCNE5/DPP10/DPP6/PCSK9/KCNV1/WNK3/KCNE1B/NEDD4L/KCNMB2
GOBP_STEROID_ESTERIFICATION	GOBP_STEROID_ESTERIFICATION	17	0.770427	2.06618	0.000412591	0.00710176	0.00594463	2442	tags=24%, list=4%, signal=23%	APOA5/APOA1/APOA2/ACAT1
GOBP_REGULATION_OF_PLASMA_LIPOPROTEIN_PARTICLE_LEVELS	GOBP_REGULATION_OF_PLASMA_LIPOPROTEIN_PARTICLE_LEVELS	96	0.429688	1.60345	0.000417239	0.00715824	0.00599191	6248	tags=18%, list=11%, signal=16%	APOA5/APOC3/ALB/APOA1/APOA2/PLA2G3/MIR33A/PCSK9/LPA/DGAT2/APOM/CUBN/LDLR/AGTR1/AMN/MIR27B/ACSL3
GOBP_PROTEIN_TRANSMEMBRANE_TRANSPORT	GOBP_PROTEIN_TRANSMEMBRANE_TRANSPORT	60	0.496543	1.73396	0.000419857	0.00715824	0.00599191	15086	tags=63%, list=27%, signal=47%	AIFM1/PEX7/HSPA8/AZGP1/TIMM17A/HSPD1/SRP54/DNAJC19/CHCHD4/PEX2/GRPEL1/TIMM21/TIMM23/TOMM70/SEC62/PEX12/HSPA5/TRAM1/PEX13/TRAM1L1/CLU/TOMM22/TOMM40L/LONP2/SEC61B/TIMM23B/PEX1/DNAJC15/PEX26/TMED10/TIMM22/TOMM20L/SEC63/TOMM20/MCL1/ZFAND2B/TIMM50/GRPEL2
GOBP_URONIC_ACID_METABOLIC_PROCESS	GOBP_URONIC_ACID_METABOLIC_PROCESS	24	0.690177	1.95958	0.000420752	0.00715824	0.00599191	8423	tags=62%, list=15%, signal=53%	UGT2B15/UGT2B4/UGT1A4/UGT2B28/SORD/UGT1A9/CRYL1/PRKCE/UGT1A7/ABHD10/DCXR/UGT2A1/UGT2A3/XYLB/UGT1A6
GOBP_POSITIVE_REGULATION_OF_PROTEIN_CATABOLIC_PROCESS	GOBP_POSITIVE_REGULATION_OF_PROTEIN_CATABOLIC_PROCESS	225	0.335278	1.39996	0.00042133	0.00715824	0.00599191	12704	tags=33%, list=22%, signal=26%	ASB5/C4BPB/TRIM67/EGF/ASB11/C4BPA/GPC3/PCSK9/NEDD4L/LRP2/RNF180/RGN/SOX9/HECW1/LDLR/ASB9/NDFIP1/SORL1/HSP90AA1/EZR/RDX/FBXL5/SOCS4/RNF14/WWP1/FOXO1/RCHY1/HERPUD1/SH3RF2/UBQLN1/ANKIB1/MAGEF1/ZYG11B/SH3D19/TMTC3/TRIB1/DDB1/NFE2L2/FAM122A/PSEN1/SUMO1/AREL1/HECTD1/RNF185/CLU/IDE/VPS35/RAB7A/PSMD10/UQCC2/GSK3B/STUB1/CDC20B/NSF/STX5/ZER1/MAPK9/ITCH/RNF139/SNX9/FBXO22/UBE2V2/FMR1/CTSC/DAB2/APC/LRRK2/UBQ…
GOMF_PHOSPHATIDYLINOSITOL_BINDING	GOMF_PHOSPHATIDYLINOSITOL_BINDING	253	0.321243	1.37398	0.00042133	0.00715824	0.00599191	11901	tags=36%, list=21%, signal=29%	PIK3C2G/KCNJ1/AMER3/TTPA/SDCBP2/TNFAIP8L3/GSDMC/SCIN/VIL1/AMER2/SYT9/PLCZ1/PXK/PFN2/RLBP1/STXBP6/DPEP1/IQGAP2/PLEKHB2/SYT7/VEPH1/CLVS2/ITPR2/TWF1/RAG2/PLEKHF2/EXOC1L/KCNQ1/SNX4/SNX13/SNAP91/DENND1B/MTM1/SNX19/SESTD1/FRMPD4/SNX24/PLEK2/OSBP/SNX29/FRMPD2/PLA2G4A/OSBPL8/SNX14/PIK3C2A/SNX30/MAPT/FZD7/MREG/PLEKHA3/MYO10/SH3YL1/PIGK/EXOC8/PICALM/ZFYVE9/LAPTM4B/ANXA9/GOLPH3/SNX3/ARFIP1/CERT1/SNX2/LANCL2…
GOBP_COMPLEMENT_ACTIVATION_ALTERNATIVE_PATHWAY	GOBP_COMPLEMENT_ACTIVATION_ALTERNATIVE_PATHWAY	18	0.749816	2.04936	0.000427347	0.00723539	0.00605649	3918	tags=33%, list=7%, signal=31%	CFHR5/C8B/C8A/MIR520B/CR2/C5
GOMF_ANTIGEN_BINDING	GOMF_ANTIGEN_BINDING	156	-0.505951	-1.48698	0.000428077	0.00723539	0.00605649	15412	tags=45%, list=27%, signal=33%	IGHA1/TRAV29DV5/IGKV2-30/IGLL1/IGKV1-5/IGHD/IGKC/IGKV5-2/IGLV3-19/IGHM/IGHV4-34/IGHV4-4/IGLC2/IGLV2-8/IGHA2/IGHG2/IGHV3-15/IGHG1/IGLV1-47/MFAP4/IGHV3-72/IGLC6/IGLV1-44/IGHV3-16/IGHV3-23/IGHV4-61/IGHV3-11/IGHV5-10-1/IGHV7-4-1/IGKV1-39/IGHV3-33/IGHV3-21/IGHV3-35/IGLV2-14/IGLV3-27/IGHV3-43/IGKV1D-39/IGKV3-20/IGHV7-81/CLEC4M/IGKV3-15/IGLV2-11/IGHV1-18/IGLV6-57/IGHV2-5/IGLV2-23/IGHV5-51/IGHV3-64D/IGHV…
GOBP_RESPONSE_TO_HEAT	GOBP_RESPONSE_TO_HEAT	161	0.369277	1.44916	0.000431143	0.00726848	0.00608419	14503	tags=44%, list=26%, signal=33%	CALCA/CPB2/SST/PKLR/CAMK2B/BAG1/DNAJA4/ARPP21/HSPH1/HSP90AA1/FGF1/DNAJA1/HSPA8/SLC52A3/CXCL10/GCLC/BAG5/TRPV4/DNAJA2/RANBP2/DNAJB1/CLPB/MAPT/TCIM/HSP90AB3P/SEH1L/EIF2S1/RPA3/NUP35/SUMO1/IGF1/HSPA2/MAPK1/BAG3/HSBP1/DNAJA3/TFEC/GSK3B/STUB1/DHX36/THBS1/YWHAE/BAG4/NUP58/NUP160/HDAC2/PDCL3/ATR/NUP98/SOD1/VCP/PTGES3/NUP153/SIRT1/BAG2/CDKN1A/CRYAB/RBBP7/CAMK2D/HSP90AB2P/HSPA1L/CHORDC1/EIF2B3/NUP88/CXCL1…
GOMF_CARBOXYLIC_ACID_BINDING	GOMF_CARBOXYLIC_ACID_BINDING	184	0.357036	1.48988	0.000454488	0.00764239	0.00639718	9271	tags=33%, list=16%, signal=27%	ALB/TAT/OTC/AGXT/GPR143/AKR1C4/FOLR3/CPS1/FABP1/MAG/GNMT/CASR/SERPINA5/DDC/AKR1C1/SIGLECL1/GOT1/TH/PHYH/PCCA/AFP/PCK1/AFM/VDR/NOS2/UGT1A9/PTGDS/GSTA1/SLC1A1/DDAH1/FTCDNL1/GOT2/ACOX2/PC/UGT1A7/NDUFAB1/FABP3/PPARG/GLUD1/ACOX1/ADH5/GLUD2/GCLC/CYP26C1/STX3/SCP2/SESN3/GLDC/NAPEPLD/FOLR1/EPDR1/MTHFS/MCCC1/TM4SF5/GSTP1/NAGS/SHMT1/FABP4/DBT/FTCD
GOMF_BETA_TUBULIN_BINDING	GOMF_BETA_TUBULIN_BINDING	38	0.584336	1.82524	0.000459559	0.0077079	0.00645201	14109	tags=47%, list=25%, signal=36%	SLC6A2/PACRG/GJB6/GABARAPL1/GABARAPL2/ARL8B/FGF13/LRPPRC/TRPV4/APPL1/PIFO/VAPB/TAOK1/CCT5/SPAST/BCAS3/EML4/ARL8A
GOBP_POSITIVE_REGULATION_OF_LIPID_TRANSPORT	GOBP_POSITIVE_REGULATION_OF_LIPID_TRANSPORT	85	0.449675	1.61843	0.000475073	0.00794777	0.0066528	7511	tags=26%, list=13%, signal=22%	CRH/APOA1/PON1/PLA2G3/CCK/CES1/CYP4A11/AVPR1A/TAC1/CYP4F2/ABCA8/ACSL1/GALR1/ENPP7/SLC12A2/FABP3/GAL/STXBP1/PRKCD/AVPR1B/ATP8A1/SCP2
GOBP_NAD_METABOLIC_PROCESS	GOBP_NAD_METABOLIC_PROCESS	50	0.537672	1.81215	0.000480436	0.00801704	0.00671079	5707	tags=20%, list=10%, signal=18%	NMRK2/ALDOB/GPD1L/PKLR/QPRT/GPD1/BPGM/PCK2/PFKM/ENO3
GOBP_MODIFIED_AMINO_ACID_TRANSPORT	GOBP_MODIFIED_AMINO_ACID_TRANSPORT	29	0.649587	1.95655	0.000483414	0.00803564	0.00672636	7858	tags=45%, list=14%, signal=39%	FOLR3/SLC19A2/SLC6A20/LRP2/SLC7A9/SLC22A16/SLC6A13/PDZK1/SLC13A3/SLC16A12/SLC22A4/FOLR1/SLC25A20
GOCC_DNA_PACKAGING_COMPLEX	GOCC_DNA_PACKAGING_COMPLEX	116	0.390177	1.47583	0.000484001	0.00803564	0.00672636	3843	tags=19%, list=7%, signal=18%	H2BW2/H4C6/H1-5/H2BC3/H4C4/H4C2/H3C11/H2BC10/H3C2/H3C7/H4C1/H2AC21/H1-1/H1-4/H3C3/H4C13/H1-3/H4C3/H3C1/H2BC14/H2AC12/H2AC4
GOMF_IMMUNOGLOBULIN_BINDING	GOMF_IMMUNOGLOBULIN_BINDING	24	0.688258	1.95413	0.000492674	0.00815898	0.0068296	645	tags=17%, list=1%, signal=16%	HRG/PIP/AMBP/UMOD
GOBP_VASCULAR_TRANSPORT	GOBP_VASCULAR_TRANSPORT	88	0.450316	1.63575	0.000496999	0.00819562	0.00686027	9456	tags=39%, list=17%, signal=32%	SLC38A3/SLC22A8/SLC16A7/SLC7A8/SLC7A3/AVPR1A/SLC2A4/SLC5A1/SLC6A20/SLC29A2/LRP2/SLC6A13/SLC15A2/SLC4A4/SLC1A1/SLC22A2/SLC1A2/ABCC4/SLC12A2/SLC13A3/SLC2A13/SLC16A12/SLC27A4/ABCG2/AVPR1B/ATP8A1/SLC22A1/ABCB1/CD36/LEPR/SLC6A17/SLC44A1/SLC9A3R1/TFRC
GOBP_NEGATIVE_REGULATION_OF_CELLULAR_RESPONSE_TO_INSULIN_STIMULUS	GOBP_NEGATIVE_REGULATION_OF_CELLULAR_RESPONSE_TO_INSULIN_STIMULUS	39	0.578468	1.82444	0.000497386	0.00819562	0.00686027	7371	tags=21%, list=13%, signal=18%	AHSG/TRIM72/MIR103A1/GRB14/ENPP1/SLC27A4/PIP4K2C/PRKCD
GOBP_SULFUR_AMINO_ACID_METABOLIC_PROCESS	GOBP_SULFUR_AMINO_ACID_METABOLIC_PROCESS	37	0.582565	1.81353	0.000503229	0.00827112	0.00692347	12157	tags=62%, list=21%, signal=49%	AGXT/CPS1/GNMT/DPEP1/TST/MMUT/MSRA/CDO1/APIP/GCLC/BHMT/ENOPH1/MAT1A/MTHFD2L/GCLM/ADO/NOX4/SMS/ADI1/BHMT2/AHCY/TXN2/MTHFD1
GOMF_RETINOL_DEHYDROGENASE_ACTIVITY	GOMF_RETINOL_DEHYDROGENASE_ACTIVITY	20	0.721034	2.04604	0.000513579	0.00842012	0.00704819	4751	tags=45%, list=8%, signal=41%	ADH4/ADH1A/ADH1C/HSD17B6/RDH12/ADH6/RDH16/RDH11/ADH1B
GOBP_PROTEIN_K48_LINKED_UBIQUITINATION	GOBP_PROTEIN_K48_LINKED_UBIQUITINATION	61	0.509356	1.79313	0.000522972	0.00855274	0.0071592	15957	tags=64%, list=28%, signal=46%	KLHL3/NEDD4L/RNF152/NHLRC4/AMFR/SKP1/UBE2D1/TOPORS/UBE2D3/UBE2Q2/UBE2B/RNF6/UBE2G1/UBE2K/TRIM44/RNF5/RNF8/ITCH/UBE3A/IFI27/UBE2A/UBE2D4/BTRC/UBE2E3/RNF146/BIRC2/TRIM32/UBE2E1/FBXO38/DTX3L/RNF187/BFAR/RNF4/UBE2D2/ARIH2/UBE2R2/MARCHF6/RBX1/PPIA
GOBP_2_OXOGLUTARATE_METABOLIC_PROCESS	GOBP_2_OXOGLUTARATE_METABOLIC_PROCESS	16	0.778947	2.06825	0.000526368	0.00857921	0.00718136	7896	tags=69%, list=14%, signal=59%	TAT/GOT1/PHYH/DLD/GOT2/GPT2/MRPS36/OGDH/L2HGDH/IDH2/DLST
GOMF_LIPOPROTEIN_PARTICLE_RECEPTOR_BINDING	GOMF_LIPOPROTEIN_PARTICLE_RECEPTOR_BINDING	28	0.664253	1.95624	0.000527207	0.00857921	0.00718136	2462	tags=18%, list=4%, signal=17%	APOA5/APOC3/APOA1/APOA2/PCSK9
GOBP_LIPID_IMPORT_INTO_CELL	GOBP_LIPID_IMPORT_INTO_CELL	34	0.619871	1.91627	0.000533012	0.00865221	0.00724246	11774	tags=56%, list=21%, signal=44%	SLC1A6/GRM1/SLC27A2/ACSL1/SLC27A5/SPX/KCNJ10/SLC1A1/SLC1A2/FABP3/ACSL3/SLC27A4/CLN8/CD36/PSEN1/ARL6IP1/ARL6IP5/THBS1/NTSR1
GOBP_RESPONSE_TO_VITAMIN	GOBP_RESPONSE_TO_VITAMIN	89	0.436045	1.58784	0.00054086	0.00875793	0.00733096	4305	tags=18%, list=8%, signal=17%	OTC/TYR/BMP7/SLC34A1/ARG1/F7/CYP1A1/BCHE/CASR/PDX1/SFRP1/NNT/ALDH1A2/ASCL1/CAT/VDR
GOMF_TRANSFERASE_ACTIVITY_TRANSFERRING_ACYL_GROUPS	GOMF_TRANSFERASE_ACTIVITY_TRANSFERRING_ACYL_GROUPS	253	0.317543	1.35815	0.000544044	0.00878778	0.00735595	11050	tags=35%, list=19%, signal=28%	HHATL/BAAT/GGT6/NAT8L/HMGCS2/CDY1B/CDY2B/GPAT3/CDY1/NAT8B/PLAAT5/ACAT1/ZDHHC23/ELOVL4/NAT8/DGAT2/ZDHHC2/GLYATL1/ACAA2/ACSM2B/ELOVL7/ZDHHC3/ALAS1/PLAAT2/GLYAT/QPCT/CLYBL/DLAT/SPTLC3/GNPNAT1/MOGAT2/HADHB/SPTSSA/OLAH/ATE1/CPT1A/PDHX/NAA30/HMGCS1/CPT2/HHAT/PIGW/ABHD5/CERS4/SCP2/CRAT/ACSM2A/NAA50/ZDHHC21/DLST/HADHA/ELP3/MBOAT2/SPTLC2/CROT/NAA15/PLA2G4A/LPCAT3/AGPAT3/GPAM/ZDHHC13/ZDHHC4/MOGAT1/NAGS/HAT…
GOCC_RIBOSOME	GOCC_RIBOSOME	227	0.32798	1.36297	0.000551681	0.00888925	0.00744088	30610	tags=95%, list=54%, signal=44%	RNA5S9/PPARGC1A/MRPL53/MRPL34/MRPS28/MRPL50/MRPS35/NDUFAB1/MRPS36/LARP4/MRPL44/MRPL19/MRPL15/MRPL49/MRPL35/MRPS30/MRPL13/MRPS16/MRPS22/MRPL3/DHX29/MRPL1/MRPS18A/MRPL47/MRPL54/SERP1/MRPS18B/DDX3X/MRPL48/MRPS9/MRPS10/MRPL30/MRPS33/MPV17L2/PNPT1/MRPL42/RPS3A/MRPL45/MRPL41/MRPL39/MALSU1/RSL24D1/DHX9/CHCHD1/MRPL4/MRPL16/MRPL32/MRPL21/MRPS23/DNAJC21/MRPS14/MRPS31/EIF2A/FMR1/MRPS7/MRPL22/RPL36AL/MRPL14/…
GOBP_LAMELLIPODIUM_ASSEMBLY	GOBP_LAMELLIPODIUM_ASSEMBLY	71	0.465928	1.69403	0.000558477	0.00897581	0.00751334	2392	tags=7%, list=4%, signal=7%	HRG/FRMD7/KIT/OCLN/SLIT2
GOBP_RESPONSE_TO_TOPOLOGICALLY_INCORRECT_PROTEIN	GOBP_RESPONSE_TO_TOPOLOGICALLY_INCORRECT_PROTEIN	205	0.339664	1.39431	0.000559791	0.00897581	0.00751334	12328	tags=42%, list=22%, signal=33%	ERP27/PACRG/UMOD/AGR2/DNAJB9/TMEM33/ERMP1/HSPA4L/CCL2/CHAC1/AMFR/CLGN/HSPH1/HSP90AA1/F12/HSPA4/DNAJA1/HSPA9/HSPA8/ATP6V0D1/DNAJB14/CCND1/PPP1R15B/CUL3/HSPD1/FICD/HSPE1/BOK/HSPA13/HSPB7/GFPT1/KLHL15/TMEM129/SRPRB/HERPUD1/STT3B/DNAJB1/SERP1/TM7SF3/DNAJC3/EIF2AK3/UBE2W/CREB3/EIF2S1/NFE2L2/DNAJB5/TMBIM6/XBP1/HSPA2/MFN2/HSPA5/WFS1/YOD1/BAG3/WIPI1/ERP44/JKAMP/RNF185/UFL1/CLU/YIF1A/GET3/ATF3/SELENOS/RNF…
GOBP_REGULATION_OF_GENE_SILENCING_BY_RNA	GOBP_REGULATION_OF_GENE_SILENCING_BY_RNA	122	0.386042	1.481	0.000567617	0.0090791	0.0075998	15319	tags=45%, list=27%, signal=33%	H4C6/H4C4/H4C2/H3C11/H3C2/H3C7/H4C1/H3C3/H4C13/H4C3/H3C1/TRIM71/LIN28B/PPARG/ZMPSTE24/RANBP2/POLR2L/H4C5/SEH1L/POLR2K/NUP35/H3C10/MYCN/POLR2C/DHX9/DDX5/IPO8/AJUBA/FMR1/NUP58/NUP160/MAP2K1/BMP4/POLR2B/NUP98/NUP153/MAEL/H4C9/ELAVL1/XPO5/NUP88/NUP133/NUP50/PUM2/NUP205/RIPK1/NUP37/NUP54/PPP3CA/DDX6/H4C15/POLR2E/EIF4ENIF1/EIF4G1/BCDIN3D
GOBP_ASPARTATE_FAMILY_AMINO_ACID_CATABOLIC_PROCESS	GOBP_ASPARTATE_FAMILY_AMINO_ACID_CATABOLIC_PROCESS	23	0.691137	1.97544	0.000574799	0.00913112	0.00764334	9879	tags=74%, list=17%, signal=61%	SLC25A21/CRYM/GOT1/DLD/ASRGL1/GOT2/DDO/RIDA/OGDH/SDSL/DLST/MAT1A/ALDH7A1/SDS/GCAT/GCDH/AADAT
GOBP_VACUOLAR_ACIDIFICATION	GOBP_VACUOLAR_ACIDIFICATION	23	0.691122	1.97539	0.000574799	0.00913112	0.00764334	86	tags=9%, list=0%, signal=9%	ATP6V0A4/ATP6V0D2
GOBP_POST_GOLGI_VESICLE_MEDIATED_TRANSPORT	GOBP_POST_GOLGI_VESICLE_MEDIATED_TRANSPORT	103	0.417891	1.56102	0.000576108	0.00913112	0.00764334	15334	tags=55%, list=27%, signal=40%	STXBP6/ANK3/STEAP2/LYPLA1/SORL1/SORCS1/SCAMP1/AMN/ACSL3/EXOC1L/VAMP8/AP1AR/EXOC5/ARFGEF2/VTI1B/RAB14/AP1G1/GOLGA4/EXOC8/RAB10/GOLPH3/PREPL/GOLGA7/ARL3/KIF16B/WIPI1/SORT1/LAMP1/EXOC6/COMMD1/SCFD1/VPS13A/SPTBN1/SYS1/NSF/VPS54/RABIF/EXOC2/RP2/BLZF1/VTI1A/RABEP1/GGA2/VPS35L/SCAMP2/ANKFY1/GOLPH3L/SEC16A/BBS2/EXOC6B/AP3D1/VAMP3/EPS15/VPS13C/GOSR2/CNST/MYO5A
GOBP_LIPOSACCHARIDE_METABOLIC_PROCESS	GOBP_LIPOSACCHARIDE_METABOLIC_PROCESS	110	0.422161	1.57432	0.000577727	0.00913112	0.00764334	11122	tags=39%, list=20%, signal=32%	CWH43/KIT/FA2H/GAL3ST3/ST8SIA5/NEU4/UGT8/ST3GAL4/B4GALT6/GBA3/ASAH1/ST3GAL6/ENPP7/SMPD1/PIGH/PGAP4/PIGW/GLB1/ST8SIA6/B3GALNT1/PRKCD/SUMF1/PIGO/GLTP/B4GALNT1/ITGB8/ST3GAL1/B3GALT1/PIGA/PIGK/FUCA1/SCCPDH/PIGX/NEU1/MPPE1/HEXB/PIGF/CLN6/PIGS/DPM1/PRKAA1/GBA2/STS
GOBP_ACID_SECRETION	GOBP_ACID_SECRETION	40	0.593173	1.8843	0.000577831	0.00913112	0.00764334	2361	tags=22%, list=4%, signal=22%	SLC26A7/SLC9A4/UMOD/SLC10A1/ABCB11/MIR33A/CES1/CASR/SLC51B
GOCC_NADH_DEHYDROGENASE_COMPLEX	GOCC_NADH_DEHYDROGENASE_COMPLEX	50	0.534996	1.80313	0.000585707	0.00923333	0.0077289	14244	tags=76%, list=25%, signal=57%	NDUFC2-KCTD14/NDUFA4/NDUFS1/NDUFB6/NDUFB5/NDUFC2/NDUFAB1/NDUFB2/NDUFA6/DMAC1/NDUFB1/NDUFA5/NDUFB3/NDUFB9/NDUFA9/NDUFA8/NDUFS4/NDUFS3/NDUFAF1/NDUFS6/NDUFC1/NDUFA10/NDUFV1/NDUFB7/NDUFA2/NDUFS8/NDUFA1/NDUFS2/NDUFB10/NDUFB11/NDUFB4/NDUFS7/NDUFB8/NDUFA12/FOXRED1/DMAC2/NDUFA11/NDUFA3
GOBP_POSITIVE_REGULATION_OF_RESPONSE_TO_TUMOR_CELL	GOBP_POSITIVE_REGULATION_OF_RESPONSE_TO_TUMOR_CELL	14	0.786659	2.02151	0.000617452	0.00969588	0.00811608	3038	tags=21%, list=5%, signal=20%	HRG/SLC22A13/IL12B
GOBP_LAMELLIPODIUM_ORGANIZATION	GOBP_LAMELLIPODIUM_ORGANIZATION	88	0.446282	1.62109	0.000618005	0.00969588	0.00811608	2392	tags=7%, list=4%, signal=7%	HRG/FRMD7/KIT/VIL1/OCLN/SLIT2
GOBP_RESPONSE_TO_PURINE_CONTAINING_COMPOUND	GOBP_RESPONSE_TO_PURINE_CONTAINING_COMPOUND	143	0.378875	1.5043	0.000621587	0.0097288	0.00814364	6855	tags=22%, list=12%, signal=19%	CFTR/DNTT/AGXT/TYR/HCN2/TMEM38A/CPS1/SLC26A3/DUOX2/KCNJ11/PPARGC1A/SLC6A4/CRHBP/PKLR/FDX1/TMEM38B/FOSB/PCK1/GPD1/REN/CIB2/ITPR2/HCN4/EZR/CDO1/PPARG/AQP1/CACNA1S/HMGCS1/SDC1/KCNQ1
GOBP_POSITIVE_REGULATION_OF_LIPID_CATABOLIC_PROCESS	GOBP_POSITIVE_REGULATION_OF_LIPID_CATABOLIC_PROCESS	27	0.656961	1.92411	0.000627741	0.00980173	0.00820469	7371	tags=44%, list=13%, signal=39%	APOA5/APOA1/APOA2/AADAC/FABP1/ANGPTL3/PLIN5/ENPP7/PRKCE/CPT1A/ABHD5/PRKCD
GOBP_SPLICEOSOMAL_TRI_SNRNP_COMPLEX_ASSEMBLY	GOBP_SPLICEOSOMAL_TRI_SNRNP_COMPLEX_ASSEMBLY	24	0.682425	1.93757	0.000629326	0.00980314	0.00820587	1425	tags=17%, list=3%, signal=16%	RNU4-2/RNU5A-1/RNU5B-1/RNU4-1
GOBP_ETHANOL_METABOLIC_PROCESS	GOBP_ETHANOL_METABOLIC_PROCESS	22	0.690623	1.96558	0.000637233	0.00990278	0.00828927	2596	tags=27%, list=5%, signal=26%	ADH4/ADH1A/ADH1C/SULT2A1/ADH6/ALDH1B1
GOBP_REGENERATION	GOBP_REGENERATION	190	0.339491	1.4052	0.000654105	0.0101177	0.00846917	6118	tags=14%, list=11%, signal=12%	NR0B2/APOA5/BAAT/OMG/APOA1/CPB2/F7/MAG/KLK6/PDX1/CHL1/ERBB4/MYMK/PTPN3/IHH/MIR221/ANXA3/CD9/KLF5/RGN/KLF4/MIR222/ENO3/AKIRIN1/NR4A3/PPARG
GOMF_IMMUNOGLOBULIN_RECEPTOR_BINDING	GOMF_IMMUNOGLOBULIN_RECEPTOR_BINDING	71	-0.574386	-1.56766	0.000654148	0.0101177	0.00846917	12745	tags=56%, list=22%, signal=44%	IGHM/IGHV4-34/IGHV4-4/IGLC2/IGHA2/IGHG2/IGHV3-15/IGHG1/IGHV3-72/IGLC6/IGHV3-16/IGHV3-23/IGHV4-61/IGHV3-11/IGHV5-10-1/IGHV7-4-1/IGHV3-33/IGHV3-21/IGHV3-35/IGHV3-43/IGHV7-81/IGHV1-18/IGHV2-5/IGHV5-51/IGHV3-64D/IGHV4-39/TARM1/IGHV2-26/IGHV1-69D/IGHV3-13/IGHG4/IGHV3-48/IGHV3-20/IGHV1-45/IGHV1OR15-1/IGHV4-59/IGHV4-28/IGHV2-70/IGHV1-69-2/IGHV3-73
GOBP_REVERSE_CHOLESTEROL_TRANSPORT	GOBP_REVERSE_CHOLESTEROL_TRANSPORT	18	0.738191	2.01759	0.000658297	0.0101444	0.00849149	1970	tags=28%, list=3%, signal=27%	APOC3/APOA1/APOA2/MIR33A/CES1
GOBP_NUCLEAR_TRANSCRIBED_MRNA_CATABOLIC_PROCESS	GOBP_NUCLEAR_TRANSCRIBED_MRNA_CATABOLIC_PROCESS	207	0.330122	1.3439	0.000658966	0.0101444	0.00849149	30352	tags=96%, list=53%, signal=45%	PDE12/DCPS/CPEB3/TOB1/EXOSC7/ETF1/PPP2CA/GSPT1/PRPF18/WDR61/NOCT/LSM3/TENT4B/SAMD4A/GSPT2/RPS3A/NCBP1/MTPAP/LSM1/XRN2/DDX5/DHX36/CNOT6L/SMG8/PNRC2/SECISBP2/NCBP2/RC3H2/EXOSC4/RPS29/PELO/RPL15/HBS1L/LSM4/PNLDC1/DIS3/RPL21/CNOT1/SSB/CNOT6/CNOT7/LSM6/EXOSC3/EXOSC6/RBM8A/ZFP36L2/TTC37/RPS13/CNOT11/MLH1/EIF4A3/UPF1/PPP2R2A/DDX6/XRN1/CNOT10/BTG2/NBAS/EIF4ENIF1/EIF4G1/RC3H1/NBDY/CSDE1/PATL1/CNOT8/RPL22/…
GOMF_ORGANIC_ACID_SODIUM_SYMPORTER_ACTIVITY	GOMF_ORGANIC_ACID_SODIUM_SYMPORTER_ACTIVITY	29	0.643108	1.93704	0.00066054	0.0101448	0.00849184	7507	tags=52%, list=13%, signal=45%	SLC13A2/SLC6A15/SLC10A1/SLC1A6/SLC5A8/SLC10A2/SLC6A20/SLC6A13/SLC1A1/SLC10A5/SLC1A2/SLC5A12/SLC13A3/SLC6A12/SLC13A5
GOBP_PROTEIN_TARGETING_TO_MITOCHONDRION	GOBP_PROTEIN_TARGETING_TO_MITOCHONDRION	99	0.419129	1.58053	0.000663601	0.010168	0.00851126	13949	tags=51%, list=25%, signal=38%	MGARP/AIFM1/FZD5/TIMM10B/MIPEP/HSP90AA1/HSPA4/TIMM17A/HSPD1/TIMM8B/TIMM10/PINK1/FBXO7/DNAJC19/CHCHD4/UBE2D3/PMPCB/GRPEL1/TIMM21/RHOU/FIS1/TIMM23/TOMM70/MFN2/BAG3/TOMM34/UBL5/SAMM50/SREBF2/PMPCA/TOMM22/PRKAA1/MFF/TOMM40L/IMMP2L/LEPROT/TIMM23B/BAG4/DNAJC15/IMMP1L/LRRK2/TIMM13/TIMM22/TIMM9/TOMM5/TOMM20L/HSPA1L/BCAP31/TOMM20/LMAN1
GOBP_NEGATIVE_REGULATION_OF_FIBRINOLYSIS	GOBP_NEGATIVE_REGULATION_OF_FIBRINOLYSIS	10	0.863595	2.07173	0.000666615	0.0101904	0.00852999	1836	tags=40%, list=3%, signal=39%	HRG/APOH/CPB2/PLG
GOBP_POSITIVE_REGULATION_OF_HORMONE_SECRETION	GOBP_POSITIVE_REGULATION_OF_HORMONE_SECRETION	123	0.385719	1.48785	0.000677855	0.0103381	0.00865364	6859	tags=21%, list=12%, signal=19%	NR0B2/NKX6-1/CFTR/CRH/PLA2G3/ADCYAP1/OXCT1/MYRIP/RBP4/PFKFB2/CASR/PDX1/TAC1/ILDR1/CLTRN/VSNL1/GALR1/UCN3/PCK2/PRKCE/SELENOT/GLUD1/GPR27/GAL/VAMP8/SNX4
GOBP_CHYLOMICRON_ASSEMBLY	GOBP_CHYLOMICRON_ASSEMBLY	11	0.831179	2.0577	0.000694034	0.0105603	0.00883963	337	tags=27%, list=1%, signal=27%	APOC3/APOA1/APOA2
GOMF_MODIFIED_AMINO_ACID_BINDING	GOMF_MODIFIED_AMINO_ACID_BINDING	93	0.429982	1.58999	0.00070018	0.0106291	0.00889727	9577	tags=37%, list=17%, signal=30%	SYT10/GPR143/TRIM72/FOLR3/CPS1/CPNE6/GSDMC/SCIN/GNMT/SYT9/SYT17/SYT8/DPEP1/ANXA13/MMUT/SYT3/FTCDNL1/SYT7/HSPA8/RS1/PTGES2/FOLR1/CAVIN2/MTHFS/OSBPL8/MGST2/HAVCR1/GSTP1/GSTM3/FTCD/ANXA9/GAS6/LANCL1/NOX4
GOMF_CARBON_OXYGEN_LYASE_ACTIVITY	GOMF_CARBON_OXYGEN_LYASE_ACTIVITY	79	0.468447	1.67786	0.000705972	0.0106635	0.00892605	9334	tags=38%, list=16%, signal=32%	CA10/CYP1A2/ETNPPL/CYP1A1/CA2/HACD3/AUH/CA4/EHHADH/CA3/ACO2/FH/ENO3/ECHDC3/ACO1/HADHB/APIP/HSD17B4/PCBD1/CA5A/ECHDC1/PTS/HADHA/HACD2/ALOXE3/ECHS1/ECI1/DGLUCY/CA13/ALAD
GOBP_AMMONIUM_TRANSPORT	GOBP_AMMONIUM_TRANSPORT	10	0.861125	2.06581	0.000707323	0.0106635	0.00892605	108	tags=20%, list=0%, signal=20%	RHCG/RHBG
GOMF_AMMONIUM_TRANSMEMBRANE_TRANSPORTER_ACTIVITY	GOMF_AMMONIUM_TRANSMEMBRANE_TRANSPORTER_ACTIVITY	10	0.861125	2.06581	0.000707323	0.0106635	0.00892605	108	tags=20%, list=0%, signal=20%	RHCG/RHBG
GOBP_IMMUNE_RESPONSE_TO_TUMOR_CELL	GOBP_IMMUNE_RESPONSE_TO_TUMOR_CELL	21	0.695339	1.97011	0.000722132	0.0108618	0.00909202	3038	tags=14%, list=5%, signal=14%	HRG/SLC22A13/IL12B
GOMF_POTASSIUM_CHANNEL_ACTIVITY	GOMF_POTASSIUM_CHANNEL_ACTIVITY	120	0.393377	1.49854	0.00074359	0.0111589	0.00934077	4853	tags=19%, list=9%, signal=18%	LRRC52/LRRC38/FXYD4/KCNE5/KCNG3/HCN2/TMEM38A/KCNJ1/KCNA1/GRIK1/KCNJ11/KCNK15/KCNV1/GRIK5/KCNE1B/TMEM38B/KCNMB2/KCNH6/KCNH7/KCNIP1/KCNJ10/KCNMA1/KCNA2
GOBP_ESTROGEN_METABOLIC_PROCESS	GOBP_ESTROGEN_METABOLIC_PROCESS	38	0.570604	1.78234	0.000748417	0.0112058	0.00937995	6760	tags=29%, list=12%, signal=26%	UGT2B15/CYP1A2/UGT2B4/CYP1A1/CYP3A4/CYP3A7/HSD17B12/HSD17B8/UGT1A7/HSD17B4/DHRS11
GOBP_CELLULAR_RESPONSE_TO_KETONE	GOBP_CELLULAR_RESPONSE_TO_KETONE	92	0.434008	1.6068	0.000785735	0.0117377	0.00982522	8184	tags=26%, list=14%, signal=22%	CFTR/CRH/DEFB104B/ARG1/DEFB104A/SFRP1/FDX1/PCK1/DCPS/PCK2/KLF4/PRKCE/PPARG/AQP1/PRKAA2/NCOA4/EIF4E/FOXO1/AKR1B1/ADCY1/FECH/AGTR2/SGK1/KLF9
GOBP_GLUTATHIONE_METABOLIC_PROCESS	GOBP_GLUTATHIONE_METABOLIC_PROCESS	63	0.498254	1.75076	0.000805728	0.012009	0.0100523	9294	tags=43%, list=16%, signal=36%	GSTA3/GGT6/EEF1G/CLIC5/NAT8/DPEP1/GSTA1/SLC1A1/CHAC1/GSTO2/GSTA5/GSTZ1/CHAC2/GSTA2/GGTLC1/GLO1/GCLC/PTGES2/CNDP2/HAGH/MGST2/GSTO1/GGTLC2/GSTP1/GCLM/GSTM3/NFE2L2
GOMF_LIPASE_ACTIVATOR_ACTIVITY	GOMF_LIPASE_ACTIVATOR_ACTIVITY	14	0.77726	1.99735	0.000839952	0.0124907	0.0104555	360	tags=14%, list=1%, signal=14%	APOA5/APOH
GOBP_MANNOSYLATION	GOBP_MANNOSYLATION	36	0.580623	1.79924	0.000846973	0.0125666	0.0105191	17062	tags=78%, list=30%, signal=54%	ALG1L/LARGE2/ALG2/CRPPA/POMGNT2/NUS1/TMTC3/ALG11/DPM1/DPY19L4/SDF2L1/ALG8/B4GAT1/PIGV/PIGZ/RXYLT1/FKTN/ALG1/PIGM/PIGB/TMTC2/ALG12/POMT2/FKRP/POMT1/ALG9/LARGE1/TMTC1
GOBP_APOPTOTIC_MITOCHONDRIAL_CHANGES	GOBP_APOPTOTIC_MITOCHONDRIAL_CHANGES	114	0.398575	1.51169	0.000852588	0.0126214	0.0105649	13929	tags=51%, list=24%, signal=38%	CCK/ERBB4/SLC25A5/HRK/SLC25A4/ACAA2/NDUFS1/BIK/GHITM/MIR29A/SLC35F6/CHCHD10/PPIF/MUL1/FXN/HSPD1/PMAIP1/BOK/TMEM14A/PINK1/FZD9/PPP2CB/SFN/MOAP1/OPA1/MPV17L/GPER1/FIS1/GCLM/IGF1/BCL2/VDAC2/CLU/BLOC1S2/VPS35/ATG3/PSMD10/MAPK8/BNIP3/GSK3B/YWHAB/MFF/TFDP2/TP73/YWHAE/FAM162A/PRELID1/DNM1L/YWHAQ/THEM4/TFDP1/PPP1R13B/ATF2/YWHAH/HK2/BAK1/TNFSF10/TMEM102
GOBP_ADIPOSE_TISSUE_DEVELOPMENT	GOBP_ADIPOSE_TISSUE_DEVELOPMENT	38	0.566779	1.7704	0.000870964	0.0128644	0.0107683	13343	tags=53%, list=23%, signal=40%	OXCT1/CASR/PPARGC1A/SOX8/DGAT2/SLC25A25/SORL1/LEP/SPTLC2/UBB/LRP5/XBP1/PIK3CA/POU4F2/SPART/PGRMC2/SIRT1/ATF2/PLAAT3/RORC
GOBP_SPLICEOSOMAL_SNRNP_ASSEMBLY	GOBP_SPLICEOSOMAL_SNRNP_ASSEMBLY	51	0.534725	1.79818	0.000883488	0.01302	0.0108986	12531	tags=31%, list=22%, signal=24%	RNU4-2/RNU5A-1/RNU5B-1/RNU4-1/RNU6-1/STRAP/RNU6ATAC/SNRPD3/SRSF12/RNU4ATAC/RNU6-7/WDR77/DDX20/PRMT5/SNRPD1/LSM4
GOBP_REGULATION_OF_CELLULAR_RESPONSE_TO_HEAT	GOBP_REGULATION_OF_CELLULAR_RESPONSE_TO_HEAT	79	0.461663	1.65356	0.000898901	0.0132175	0.0110639	24593	tags=95%, list=43%, signal=54%	CAMK2B/BAG1/HSPH1/HSP90AA1/HSPA8/BAG5/RANBP2/DNAJB1/MAPT/SEH1L/RPA3/NUP35/MAPK1/BAG3/HSBP1/GSK3B/YWHAE/BAG4/NUP58/NUP160/ATR/NUP98/PTGES3/NUP153/SIRT1/BAG2/CRYAB/CAMK2D/HSPA1L/CHORDC1/NUP88/NUP133/NUP50/NUP205/NUP37/NUP54/HSP90AB1/NDC1/HSPB8/MAPKAPK2/MTOR/NUP155/EP300/NUP42/FKBP4/RPA1/NUP43/DNAJB6/NUP93/CCAR2/SEC13/RAE1/RPTOR/MLST8/HIKESHI/DNAJC7/RPA2/MAPK3/POM121/IER5/CREBBP/NUP210/NUP214/NUP188…
GOBP_NEGATIVE_REGULATION_OF_CHEMOTAXIS	GOBP_NEGATIVE_REGULATION_OF_CHEMOTAXIS	62	0.490261	1.7172	0.000902127	0.0132352	0.0110788	3918	tags=13%, list=7%, signal=12%	HRG/MIR15A/STAP1/SLIT2/SEMA3D/DDT/DPP4/C5
GOBP_WATER_TRANSPORT	GOBP_WATER_TRANSPORT	21	0.685738	1.9429	0.000914695	0.0133897	0.011208	738	tags=19%, list=1%, signal=19%	AQP6/CFTR/AQP5/AQP2
GOBP_CIRCADIAN_RHYTHM	GOBP_CIRCADIAN_RHYTHM	212	0.323309	1.32283	0.000924009	0.0134959	0.0112969	7783	tags=17%, list=14%, signal=15%	NR0B2/PASD1/CRH/MTNR1B/ADRB1/SPSB4/F7/PPARGC1A/USP2/SLC6A4/MTNR1A/DDC/TH/CLDN4/NPS/CIPC/NOS2/PTGDS/LGR4/KLF10/FBXL17/HS3ST2/PPARG/CRY1/NR1D2/CPT1A/CRY2/PRKAA2/NAGLU/GNA11/NPY2R/LEP/ADCY1/NDUFA9/GFPT1/FBXL3
GOMF_TRANSFERASE_ACTIVITY_TRANSFERRING_HEXOSYL_GROUPS	GOMF_TRANSFERASE_ACTIVITY_TRANSFERRING_HEXOSYL_GROUPS	198	0.341071	1.41478	0.000929743	0.0135495	0.0113418	12603	tags=39%, list=22%, signal=31%	UGT2B15/UGT2B4/GALNT17/UGT1A4/B4GALNT2/FUT3/GALNTL6/UGT2B28/UGT8/B4GALNT3/B4GALT6/ALG1L/GYS2/FUT6/UGT1A9/LARGE2/FUT9/ALG2/HYAL1/B3GNT3/GALNT11/UGT3A1/UGT1A7/B3GNT10/PIGH/GYG1/AGL/GCNT3/ABO/FUT1/B3GALNT1/UGT2A1/UGT2A3/B3GNT2/B3GNT8/B4GALNT1/POMGNT2/C1GALT1C1L/STT3B/UGT1A6/GALNT12/GCNT1/MGAT2/ALG5/B3GALT1/GCNT4/PIGA/TMTC3/GALNT3/C1GALT1C1/GCNT2/C1GALT1/ALG11/HEXB/RPN1/DPM1/DPY19L4/MGAT4A/GBA2/GBE1/…
GOBP_ALDITOL_METABOLIC_PROCESS	GOBP_ALDITOL_METABOLIC_PROCESS	23	0.675493	1.93072	0.000936528	0.0136181	0.0113992	11045	tags=78%, list=19%, signal=63%	GOT1/DGAT2/GK/ANGPTL3/SORD/PCK1/PCK2/COQ3/MOGAT2/COQ2/AKR1B1/LEP/PLA2G4A/PGP/MOGAT1/GPD2/PDXP/GK5
GOBP_NUCLEOSIDE_DIPHOSPHATE_METABOLIC_PROCESS	GOBP_NUCLEOSIDE_DIPHOSPHATE_METABOLIC_PROCESS	154	0.364189	1.42288	0.00096338	0.0139775	0.0117001	14254	tags=45%, list=25%, signal=34%	SLC4A1/ALDOB/OGDHL/AK5/PFKFB2/PPARGC1A/PKLR/DLG2/FBP1/ESRRB/ENTPD5/GPD1/SLC4A4/BPGM/ENTPD8/PFKM/AK3/MAGI3/ENO3/NUDT9/PRKAA2/OGDH/PGAM4/DHTKD1/PRKAG2/NUDT7/RANBP2/NME5/MPP1/SEH1L/ENTPD2/PSEN1/NUP35/IGF1/PGAM1/PPARA/AK7/PGK1/APP/HIF1A/PRKAG1/CMPK1/PRKAA1/DLG1/NUP58/NUP160/NUP98/PRXL2C/NUP153/AK4/ALDOA/ZBTB20/NME6/HKDC1/AK9/MLXIPL/ENTPD3/PFKFB1/CMPK2/AK8/NUDT16/HK2/JMJD8/GPI/NUP88/ENTPD7/NUP133/LDHA…
GOBP_REGULATION_OF_BILE_ACID_METABOLIC_PROCESS	GOBP_REGULATION_OF_BILE_ACID_METABOLIC_PROCESS	15	0.787602	2.03246	0.000970138	0.0140445	0.0117562	3902	tags=40%, list=7%, signal=37%	CYP7A1/KIT/ABCB11/MIR33A/CES1/FGF19
GOBP_POSITIVE_REGULATION_OF_PEPTIDE_HORMONE_SECRETION	GOBP_POSITIVE_REGULATION_OF_PEPTIDE_HORMONE_SECRETION	95	0.419093	1.55812	0.000975949	0.0140735	0.0117805	1989	tags=12%, list=3%, signal=11%	NR0B2/NKX6-1/CFTR/CRH/ADCYAP1/OXCT1/MYRIP/RBP4/PFKFB2/CASR/PDX1
GOMF_STEROID_HYDROXYLASE_ACTIVITY	GOMF_STEROID_HYDROXYLASE_ACTIVITY	38	0.564244	1.76248	0.000976435	0.0140735	0.0117805	3834	tags=29%, list=7%, signal=27%	CYP2A6/CYP17A1/CYP1A2/CYP2A7/CYP7A1/CYP1A1/CYP3A4/CYP11A1/CYP2B6/CYP39A1/CYP3A7
GOBP_INTRACELLULAR_LIPID_TRANSPORT	GOBP_INTRACELLULAR_LIPID_TRANSPORT	46	0.537238	1.76934	0.000986813	0.0141919	0.0118796	9646	tags=43%, list=17%, signal=36%	THRSP/CES1/PCSK9/SGPP1/SYT7/ABCD3/LDLR/MIR27B/FABP3/CPT1A/PRKAA2/CPT2/SCP2/PRKAG2/SLC25A20/OSBP/SERAC1/NUS1/CERT1/ARV1
GOCC_SPLICEOSOMAL_TRI_SNRNP_COMPLEX	GOCC_SPLICEOSOMAL_TRI_SNRNP_COMPLEX	42	0.558679	1.81648	0.000997505	0.0143143	0.011982	13459	tags=40%, list=24%, signal=31%	RNU4-2/RNU5A-1/RNU5B-1/RNU4-1/RNU6-1/SNRPD3/PRPF18/LSM3/PRPF4/RNU6-7/TXNL4A/SNRPN/SNRPD1/LSM4/ZMAT2/SNRPG/LSM6
GOBP_DNA_PACKAGING	GOBP_DNA_PACKAGING	240	0.312423	1.30452	0.00102204	0.0146259	0.0122428	3250	tags=9%, list=6%, signal=9%	TSPY2/TSPY1/H2BW2/H4C6/H1-5/TSPY10/H2BC3/H4C4/H4C2/H3C11/H2BC10/H3C2/H3C7/H4C1/H1-1/H1-4/H3C3/H4C13/H1-3/H4C3/H3C1/H2BC14
GOBP_QUINONE_METABOLIC_PROCESS	GOBP_QUINONE_METABOLIC_PROCESS	34	0.604891	1.86996	0.00102368	0.0146259	0.0122428	8452	tags=44%, list=15%, signal=38%	ADH4/AKR1C4/AKR1C1/CYP4F2/COQ3/COQ9/PDSS2/COQ10B/COQ2/CBR4/AKR1B1/NDUFA9/PPTC7/PDSS1/AKR7A2
GOBP_TYROSINE_METABOLIC_PROCESS	GOBP_TYROSINE_METABOLIC_PROCESS	12	0.817506	2.04996	0.00103796	0.0147977	0.0123867	6340	tags=58%, list=11%, signal=52%	TAT/TYR/PAH/IYD/TH/HGD/GSTZ1
GOBP_REGULATION_OF_LAMELLIPODIUM_ORGANIZATION	GOBP_REGULATION_OF_LAMELLIPODIUM_ORGANIZATION	52	0.502253	1.70036	0.00108125	0.0153815	0.0128753	2392	tags=10%, list=4%, signal=9%	HRG/FRMD7/VIL1/OCLN/SLIT2
GOBP_ETHANOL_OXIDATION	GOBP_ETHANOL_OXIDATION	12	0.816378	2.04713	0.00109174	0.0154971	0.012972	2596	tags=42%, list=5%, signal=40%	ADH4/ADH1A/ADH1C/ADH6/ALDH1B1
GOBP_SECONDARY_METABOLITE_BIOSYNTHETIC_PROCESS	GOBP_SECONDARY_METABOLITE_BIOSYNTHETIC_PROCESS	23	0.670168	1.9155	0.00110059	0.0155889	0.0130489	3849	tags=26%, list=7%, signal=24%	CYP1A2/PMEL/TYR/TYRP1/SLC45A2/DDT
GOBP_REGULATION_OF_MITOCHONDRION_ORGANIZATION	GOBP_REGULATION_OF_MITOCHONDRION_ORGANIZATION	149	0.362685	1.42106	0.00113216	0.0160015	0.0133943	13929	tags=47%, list=24%, signal=36%	PPARGC1A/SLC25A5/MGARP/HRK/ACAA2/BIK/GHITM/FZD5/SLC35F6/CHCHD10/PPIF/MUL1/FXN/PRMT6/TMEM135/PMAIP1/BOK/MARCHF5/TMEM14A/PINK1/FZD9/VDAC1/SFN/MOAP1/FBXO7/OPA1/MPV17L/MAPT/VPS13D/GPER1/FIS1/GOLPH3/TFRC/IGF1/BCL2/MIEF1/OMA1/CLU/STOX1/HIF1A/VPS35/PSMD10/MAPK8/SREBF2/BNIP3/GSK3B/SQSTM1/MIEF2/YWHAB/MFF/MCU/SPIRE1/TFDP2/TP73/YWHAE/FAM162A/KDR/LRRK2/PRELID1/DNM1L/YWHAQ/TFDP1/ADCK1/PPP1R13B/ZDHHC6/YWHAH/PD…
GOBP_BILE_ACID_SIGNALING_PATHWAY	GOBP_BILE_ACID_SIGNALING_PATHWAY	12	0.813807	2.04068	0.00113498	0.0160068	0.0133988	5750	tags=50%, list=10%, signal=45%	CYP7A1/SLC10A1/DGAT2/VDR/ABCG8/ABCC4
GOMF_SERINE_TYPE_ENDOPEPTIDASE_INHIBITOR_ACTIVITY	GOMF_SERINE_TYPE_ENDOPEPTIDASE_INHIBITOR_ACTIVITY	96	0.411137	1.53422	0.0011375	0.016008	0.0133997	4673	tags=22%, list=8%, signal=20%	HRG/SERPINC1/SERPINA7/AMBP/ITIH2/ITIH1/SPINK7/WFIKKN2/SERPINA10/SERPIND1/SERPINA11/SERPINA4/SPINK1/SERPINA5/WFDC5/SPINK14/ITIH3/SERPINA6/WFDC2/WFDC12/EPPIN
GOMF_CARBOXYLIC_ESTER_HYDROLASE_ACTIVITY	GOMF_CARBOXYLIC_ESTER_HYDROLASE_ACTIVITY	143	0.3689	1.46469	0.00116061	0.0162982	0.0136426	6961	tags=26%, list=12%, signal=23%	PLA2G4F/BAAT/PNLIPRP3/PON1/PLA2G3/CEL/ACOT12/AADAC/BCHE/CES1/PLAAT5/CA2/LIPH/ACOT1/ACOT11/PON3/ABHD3/ABHD2/RGN/PNPLA8/LARS2/ACOT4/LYPLA1/PLAAT2/PNPLA4/CES5A/ABHD6/ABHD10/SIAE/ACOT2/BPHL/LYPLAL1/GDE1/NOTUM/PLA1A/DTD2/ABHD5
GOBP_CDC42_PROTEIN_SIGNAL_TRANSDUCTION	GOBP_CDC42_PROTEIN_SIGNAL_TRANSDUCTION	14	0.76507	1.96603	0.00117392	0.0164149	0.0137403	774	tags=21%, list=1%, signal=21%	APOC3/APOA1/NTN1
GOBP_MEDIUM_CHAIN_FATTY_ACID_METABOLIC_PROCESS	GOBP_MEDIUM_CHAIN_FATTY_ACID_METABOLIC_PROCESS	14	0.767063	1.97115	0.00117392	0.0164149	0.0137403	9572	tags=71%, list=17%, signal=59%	CES1/CYP4A22/CYP4A11/ACADM/ABHD3/ABHD2/OLAH/CRAT/CROT/OXSM
GOMF_DICARBOXYLIC_ACID_TRANSMEMBRANE_TRANSPORTER_ACTIVITY	GOMF_DICARBOXYLIC_ACID_TRANSMEMBRANE_TRANSPORTER_ACTIVITY	30	0.621814	1.8662	0.0011957	0.0166838	0.0139654	8471	tags=47%, list=15%, signal=40%	SLC26A7/SLC13A2/SLC26A3/SLC26A4/SLC25A21/SLC1A6/SLC1A1/SLC26A9/SLC13A3/SLC13A5/SLC25A13/SLC25A11/SLC25A30/SLC25A12
GOBP_HYDROGEN_PEROXIDE_BIOSYNTHETIC_PROCESS	GOBP_HYDROGEN_PEROXIDE_BIOSYNTHETIC_PROCESS	17	0.738858	1.98152	0.00121582	0.0169286	0.0141703	4280	tags=35%, list=8%, signal=33%	CYP1A2/CYP1A1/DUOX2/DUOXA2/MTCO2P12/DUOXA1
GOBP_MITOCHONDRION_LOCALIZATION	GOBP_MITOCHONDRION_LOCALIZATION	47	0.512703	1.69877	0.00123701	0.017187	0.0143867	13205	tags=53%, list=23%, signal=41%	ALB/HAP1/MGARP/SLC4A5/PLIN5/MUL1/MTM1/ACTR10/LRPPRC/OPA1/MAPT/UBB/ARMCX3/TRAK2/MFN2/ARMC1/HIF1A/CLUH/TRAK1/MARK1/LRRK2/DNM1L/MFN1/SPAST/AGBL4
GOBP_POSITIVE_REGULATION_OF_MITOCHONDRION_ORGANIZATION	GOBP_POSITIVE_REGULATION_OF_MITOCHONDRION_ORGANIZATION	82	0.42803	1.54507	0.00124521	0.0172644	0.0144514	14174	tags=56%, list=25%, signal=42%	PPARGC1A/MGARP/HRK/BIK/CHCHD10/PPIF/MUL1/PMAIP1/BOK/MARCHF5/PINK1/VDAC1/SFN/MOAP1/FBXO7/OPA1/VPS13D/GPER1/FIS1/BCL2/MIEF1/HIF1A/VPS35/MAPK8/BNIP3/GSK3B/MIEF2/YWHAB/MFF/MCU/SPIRE1/TFDP2/TP73/YWHAE/FAM162A/KDR/DNM1L/YWHAQ/TFDP1/ADCK1/PPP1R13B/ZDHHC6/YWHAH/BAK1/TNFSF10/TP53BP2
GOBP_MONOSACCHARIDE_BIOSYNTHETIC_PROCESS	GOBP_MONOSACCHARIDE_BIOSYNTHETIC_PROCESS	96	0.408938	1.52601	0.00125374	0.017346	0.0145197	10660	tags=45%, list=19%, signal=36%	ALDOB/RBP4/GNMT/PPARGC1A/MIR103A1/G6PC/FBP1/GOT1/DGAT2/SORD/PCK1/GPD1/RGN/GOT2/PCK2/MDH1/ENO3/PC/CRY1/NLN/FAM3C/AKR1B1/LEP/SLC25A13/SLC25A11/RANBP2/GPT/SLC25A12/SDHAF3/PGP/LEPR/DDB1/PDK2/SDS/PGAM1/PPARA/SLC35B4/ARPP19/USP7/MDH2/PGK1/ATF3/SELENOS
GOBP_RESPONSE_TO_KETONE	GOBP_RESPONSE_TO_KETONE	193	0.335635	1.39831	0.00126411	0.0174209	0.0145824	7636	tags=21%, list=13%, signal=18%	CFTR/CRH/DEFB104B/ARG1/F7/CPS1/KCNJ11/CATSPERG/DEFB104A/SLIT2/AVPR1A/SFRP1/TH/CLDN4/FDX1/DSG2/CSN1S1/FOSB/PCK1/ABHD2/UCN3/DCPS/PCK2/KLF4/PRKCE/PPARG/AQP1/PRKAA2/GLB1/NCOA4/EIF4E/CCND1/NKX2-2/FOXO1/FIBIN/FOSL1/AKR1B1/ADCY1/FECH/AGTR2
GOBP_ACETYL_COA_BIOSYNTHETIC_PROCESS_FROM_PYRUVATE	GOBP_ACETYL_COA_BIOSYNTHETIC_PROCESS_FROM_PYRUVATE	15	0.777785	2.00713	0.00126446	0.0174209	0.0145824	9447	tags=73%, list=17%, signal=61%	DLD/PDP1/DLAT/PDHA1/PDP2/GSTZ1/PDHX/PDHB/MPC2/PDK2/PDK4
GOBP_NEGATIVE_REGULATION_OF_MYOBLAST_DIFFERENTIATION	GOBP_NEGATIVE_REGULATION_OF_MYOBLAST_DIFFERENTIATION	24	0.651256	1.84908	0.00127932	0.0175887	0.0147229	2475	tags=12%, list=4%, signal=12%	NMRK2/SOSTDC1/SOX8
GOMF_SECONDARY_ACTIVE_MONOCARBOXYLATE_TRANSMEMBRANE_TRANSPORTER_ACTIVITY	GOMF_SECONDARY_ACTIVE_MONOCARBOXYLATE_TRANSMEMBRANE_TRANSPORTER_ACTIVITY	18	0.719869	1.96751	0.00132309	0.0181524	0.0151948	6892	tags=56%, list=12%, signal=49%	SLC10A1/SLC16A7/SLC1A6/SLC5A8/SLC10A2/SLC6A13/SLC1A1/SLC10A5/SLC1A2/SLC6A12
GOCC_ORGANELLE_ENVELOPE_LUMEN	GOCC_ORGANELLE_ENVELOPE_LUMEN	92	0.421291	1.55971	0.00133376	0.0182605	0.0152852	12455	tags=52%, list=22%, signal=41%	BCHE/CYCS/CAT/AIFM1/NDUFS1/GATM/TIMM10B/MICU2/SORL1/CHCHD10/NLN/TIMM8A/PRELID3B/COA7/TIMM8B/MICU1/IMMT/CIAPIN1/TIMM10/PINK1/NDUFA8/SIRT5/REXO2/CLPB/OPA1/CHCHD4/SDHAF3/TIMM23/COX17/GOLPH3/STOML2/CHCHD7/PNPT1/CHCHD2/NDUFB7/APP/FBXL4/UQCC2/NBR1/SUOX/IGF2R/ARL2BP/PRELID1/TIMM13/CHCHD5/THEM4/SOD1/TIMM9
GOBP_REGULATION_OF_TRIGLYCERIDE_CATABOLIC_PROCESS	GOBP_REGULATION_OF_TRIGLYCERIDE_CATABOLIC_PROCESS	14	0.761554	1.95699	0.0013528	0.0184826	0.0154712	1155	tags=29%, list=2%, signal=28%	APOA5/APOC3/APOA1/AADAC
GOBP_ANDROGEN_METABOLIC_PROCESS	GOBP_ANDROGEN_METABOLIC_PROCESS	30	0.615475	1.84717	0.00136324	0.0185866	0.0155582	2070	tags=20%, list=4%, signal=19%	CYP17A1/AKR1C4/CYP3A4/HSD17B6/AKR1D1/PPARGC1A
GOBP_NEGATIVE_REGULATION_OF_CELL_MIGRATION_INVOLVED_IN_SPROUTING_ANGIOGENESIS	GOBP_NEGATIVE_REGULATION_OF_CELL_MIGRATION_INVOLVED_IN_SPROUTING_ANGIOGENESIS	36	0.570213	1.76698	0.00137323	0.018684	0.0156397	5918	tags=25%, list=10%, signal=22%	MIR15A/MIR188/MIR200C/MIR494/MIR329-1/MIR221/KLF4/MIR361/MIR2355
GOBP_POSITIVE_REGULATION_OF_ACTIN_FILAMENT_BUNDLE_ASSEMBLY	GOBP_POSITIVE_REGULATION_OF_ACTIN_FILAMENT_BUNDLE_ASSEMBLY	62	0.479075	1.67802	0.0013938	0.0189245	0.0158411	3232	tags=13%, list=6%, signal=12%	APOA1/PPM1E/PFN3/VIL1/WNT11/SFRP1/TAC1/PFN2
GOMF_NAD_P_H_DEHYDROGENASE_QUINONE_ACTIVITY	GOMF_NAD_P_H_DEHYDROGENASE_QUINONE_ACTIVITY	48	0.536392	1.76035	0.00139745	0.0189349	0.0158497	13159	tags=69%, list=23%, signal=53%	NDUFC2-KCTD14/NDUFA4/NDUFS1/NDUFB6/NDUFB5/NDUFC2/NDUFAB1/NDUFB2/NDUFA6/NDUFB1/NDUFA5/NDUFB3/NDUFB9/CBR4/NDUFA9/NDUFA8/NDUFS4/NDUFS3/NDUFS6/NDUFC1/NDUFA10/NDUFV1/NDUFB7/NDUFA2/NDUFS8/NQO2/NDUFA1/NDUFS2/NDUFB10/NDUFB4/NDUFS7/NDUFB8/NDUFA12
GOBP_POSITIVE_REGULATION_OF_ORGANIC_ACID_TRANSPORT	GOBP_POSITIVE_REGULATION_OF_ORGANIC_ACID_TRANSPORT	36	0.569408	1.76449	0.00142257	0.0192118	0.0160816	7390	tags=36%, list=13%, signal=31%	PLA2G3/SLC38A3/CCK/CYP4A11/AVPR1A/CYP4F2/ACE2/CLTRN/ACSL1/SLC12A2/FABP3/STXBP1/AVPR1B
GOBP_NEGATIVE_REGULATION_OF_SMOOTH_MUSCLE_CELL_DIFFERENTIATION	GOBP_NEGATIVE_REGULATION_OF_SMOOTH_MUSCLE_CELL_DIFFERENTIATION	21	0.672574	1.9056	0.00142375	0.0192118	0.0160816	5444	tags=24%, list=10%, signal=22%	FGF9/MIR100/EREG/MIR221/RBPMS2
GOCC_RUFFLE	GOCC_RUFFLE	175	0.338485	1.34704	0.00143132	0.0192719	0.0161318	12491	tags=35%, list=22%, signal=27%	PLA2G4F/INPP5J/VIL1/AIF1L/COBL/EPB41L5/FERMT1/MYO6/PDPN/TWF1/EZR/TESC/MTSS1/LIMA1/PARD6A/PACSIN2/EPS8/KLHL2/MTM1/WWC1/MTMR6/AMOT/NCKAP1/PTPRJ/TRPV4/IFIT5/EPHA2/BAIAP2/ARHGAP18/PSD3/CD2AP/CLCN3/MYO10/TLN2/SH3YL1/PLEKHA1/SLC9A3R1/ARF6/DIAPH1/ARHGEF4/APPL1/MTMR9/SPRY2/RAB5A/TRPM7/FGD4/MYADM/CLASP2/PDXP/FAM107A/PODXL/ARF4/SNX9/ATP6V1B2/SNX5/APC/THEM4/TLR4/EEF1A1/ACAP2/ITGAV
GOBP_EPIDERMAL_GROWTH_FACTOR_RECEPTOR_SIGNALING_PATHWAY	GOBP_EPIDERMAL_GROWTH_FACTOR_RECEPTOR_SIGNALING_PATHWAY	121	0.376154	1.43866	0.00143408	0.0192719	0.0161318	12613	tags=33%, list=22%, signal=26%	SH3GL2/FAM83B/AGR2/PIGR/NEURL1/EGF/VIL1/EREG/HAP1/BTC/PTPN3/SOX9/GAREM1/MIR29A/CEACAM1/SOCS4/DUSP3/TSG101/PTPRJ/STAM2/PIK3C2A/AGT/GPER1/PSEN1/STAM/SLC30A10/KIF16B/SPRY2/PIK3CA/PDPK1/RAB7A/SNX6/ARF4/SNX5/CDC42/VPS25/ERBIN/PIK3R1/TGFA/PDE6G
GOBP_DNA_TEMPLATED_TRANSCRIPTION_INITIATION	GOBP_DNA_TEMPLATED_TRANSCRIPTION_INITIATION	249	0.300213	1.27486	0.00146753	0.0196757	0.0164699	14216	tags=35%, list=25%, signal=27%	NR0B2/H4C6/H4C4/H4C2/ESRRG/TAF7L/PPARGC1A/H4C1/H4C13/H4C3/ESRRB/NR3C2/PGR/VDR/THRB/SOX9/RXRG/CCNC/NR4A3/PPARG/ESRRA/NR1D2/TFAM/NR1I3/CCND1/TAF1B/FOSL1/NR4A1/MED7/TFB2M/POLR1F/POLR2L/H4C5/SRF/POLR2K/RARB/TAF13/GTF2A2/POLR2C/MED13/SUB1/PPARA/GTF3C4/MITF/RRN3/SNAPC5/TAF9/MNAT1/POLR1B/GTF2H2/DHX36/PSMC6/MED27/CTNNB1/SMARCA5/CDK8/SETX/ERCC2/TAF7/WWTR1/POLR2B/GTF2A1/GTF2B/PTEN/CDKN1A/PSMC2/TEAD1/HNF4G/…
GOBP_TYPE_B_PANCREATIC_CELL_DEVELOPMENT	GOBP_TYPE_B_PANCREATIC_CELL_DEVELOPMENT	20	0.691847	1.96322	0.00147013	0.0196757	0.0164699	1293	tags=10%, list=2%, signal=10%	NKX6-1/INSM1
GOBP_NEGATIVE_REGULATION_OF_PEPTIDE_HORMONE_SECRETION	GOBP_NEGATIVE_REGULATION_OF_PEPTIDE_HORMONE_SECRETION	40	0.566423	1.79932	0.00148052	0.0197744	0.0165525	4125	tags=20%, list=7%, signal=19%	CRH/STXBP5L/MTNR1B/KCNJ11/ACVR1C/CRHBP/SFRP1/VSNL1
GOBP_SODIUM_ION_IMPORT_ACROSS_PLASMA_MEMBRANE	GOBP_SODIUM_ION_IMPORT_ACROSS_PLASMA_MEMBRANE	19	0.70672	1.96704	0.00149027	0.0198642	0.0166276	2858	tags=32%, list=5%, signal=30%	SLC9A4/SLC9A2/HCN2/SLC34A1/SLC5A2/SLC5A1
GOBP_POTASSIUM_ION_IMPORT_ACROSS_PLASMA_MEMBRANE	GOBP_POTASSIUM_ION_IMPORT_ACROSS_PLASMA_MEMBRANE	47	0.504828	1.67268	0.0015028	0.0199906	0.0167335	6555	tags=30%, list=12%, signal=26%	SLC12A3/HCN2/ATP4B/KCNJ1/SLC12A1/ATP12A/KCNJ11/WNK3/ATP4A/ATP1A1/KCNJ10/HCN4/SLC12A2/KCNJ15
GOBP_BILE_ACID_SECRETION	GOBP_BILE_ACID_SECRETION	12	0.803198	2.01408	0.0015241	0.0202329	0.0169363	2361	tags=50%, list=4%, signal=48%	SLC10A1/ABCB11/MIR33A/CES1/CASR/SLC51B
GOBP_REGULATION_OF_RESPONSE_TO_TUMOR_CELL	GOBP_REGULATION_OF_RESPONSE_TO_TUMOR_CELL	17	0.732839	1.96537	0.00154139	0.0204211	0.0170938	3038	tags=18%, list=5%, signal=17%	HRG/SLC22A13/IL12B
GOBP_REGULATION_OF_POTASSIUM_ION_TRANSMEMBRANE_TRANSPORTER_ACTIVITY	GOBP_REGULATION_OF_POTASSIUM_ION_TRANSMEMBRANE_TRANSPORTER_ACTIVITY	60	0.467129	1.63124	0.00154964	0.0204659	0.0171313	6411	tags=22%, list=11%, signal=19%	LRRC52/LRRC38/KCNE5/MTNR1B/KCNA1/KCNE1B/NEDD4L/ANK3/AMIGO1/CACNA1D/ANK2/KCNC2/GAL
GOBP_TRNA_PROCESSING	GOBP_TRNA_PROCESSING	128	0.379502	1.47507	0.00155265	0.0204659	0.0171313	32256	tags=98%, list=57%, signal=43%	TRUB1/LCMT2/TRMT10C/DTWD2/DPH3/RPP25L/GRSF1/ELP3/TRMT61B/TP53RK/ELAC1/THUMPD3/TRMO/TRNT1/CLP1/RTCB/ELP4/TRMT1L/FAM98B/PRORP/TRMT9B/TRMT6/MTFMT/TRMT12/DDX1/POLR3K/KTI12/FARS2/TRMT2B/RPP14/TRMT5/TSEN15/THUMPD1/PUS3/ADAT1/METTL2A/TYW3/MOCS3/RPP25/ALKBH1/TPRKB/SSB/ELP6/POP4/TRMT10A/AARS1/LSM6/HSD17B10/ALKBH8/RPP40/MTO1/ELP1/C9orf64/METTL8/RPP38/CSTF2/QTRT2/TYW1/BCDIN3D/TRMT11/DUS4L/WDR4/RTRAF/RPUSD4/…
GOBP_POSITIVE_REGULATION_OF_POTASSIUM_ION_TRANSMEMBRANE_TRANSPORT	GOBP_POSITIVE_REGULATION_OF_POTASSIUM_ION_TRANSMEMBRANE_TRANSPORT	37	0.549532	1.7107	0.00155414	0.0204659	0.0171313	6855	tags=27%, list=12%, signal=24%	LRRC52/LRRC38/KCNE5/KCNA1/WNK3/AMIGO1/ANK2/KCNC2/GAL/KCNQ1
GOBP_REGULATION_OF_ENDOCYTOSIS	GOBP_REGULATION_OF_ENDOCYTOSIS	204	0.32766	1.33806	0.00155907	0.0204897	0.0171512	12357	tags=34%, list=22%, signal=27%	APOA5/APOC3/STAP1/VTN/SH3GL2/CD177/PLCG2/EGF/APELA/GPC3/PCSK9/NEDD4L/ARC/DKK1/NECAB2/SLC17A7/DNAJC6/F2RL1/ANGPT1/SMPD1/MIR27B/PPARG/PACSIN2/RSPO1/SNAP91/RAB17/SCAMP5/ATAD1/WASL/LGALS3/SCYL2/TSG101/BIN1/GSG1L/CD2AP/CD36/PICALM/B2M/RAB21/MAGI2/USP46/ARF6/APPL1/MIB1/RAB5A/CLU/GATA2/SDCBP/SNX12/RAB5C/TOR1A/SNCA/PRKD1/CBLL1/RAB4A/AP2B1/LRPAP1/PIK3CB/ZFYVE16/FMR1/DAB2/CDC42/LRRK2/HNRNPK/UBQLN2/DNM1L/NU…
GOBP_GLYCOSYLATION	GOBP_GLYCOSYLATION	262	0.299902	1.27875	0.00158042	0.0207236	0.017347	12603	tags=39%, list=22%, signal=30%	MUCL1/GALNT17/ST8SIA5/MUC20/B4GALNT2/SLC51B/FUT3/GALNTL6/MUC17/MUC15/MAN1C1/MUC7/ST3GAL4/B4GALT6/MUC2/ALG1L/ST6GALNAC2/ENTPD5/FUT6/ST3GAL6/LARGE2/MAN1A1/FUT9/ALG2/B3GNT3/SLC39A8/GALNT11/B3GNT10/MUC5AC/GCNT3/ST8SIA6/ABO/FUT1/CHP1/B3GALNT1/MAN2A1/B3GNT2/DOLK/GFPT1/B3GNT8/CRPPA/B4GALNT1/POMGNT2/C1GALT1C1L/STT3B/GALNT12/ST3GAL1/SERP1/RAMP1/GCNT1/MAGT1/MGAT2/ALG5/ALG14/MPDU1/B3GALT1/GCNT4/NUS1/TMTC3/D…
GOBP_FATTY_ACYL_COA_METABOLIC_PROCESS	GOBP_FATTY_ACYL_COA_METABOLIC_PROCESS	42	0.547649	1.78061	0.00158318	0.0207236	0.017347	11502	tags=55%, list=20%, signal=44%	ELOVL4/ACSL1/DGAT2/SCD5/ACSL6/ACSBG1/ELOVL7/HSD17B12/HSD17B8/FITM2/ACSL3/HSD17B4/CBR4/ACSM2A/HACD2/NUDT7/ACSL4/GCDH/FAR2/ACLY/THEM5/FAR1/ACOT7
GOBP_REGULATION_OF_MEGAKARYOCYTE_DIFFERENTIATION	GOBP_REGULATION_OF_MEGAKARYOCYTE_DIFFERENTIATION	83	0.415694	1.50834	0.00161016	0.0210347	0.0176074	3116	tags=14%, list=5%, signal=14%	H4C6/H4C4/H4C2/SCIN/H3C11/H3C2/H3C7/H4C1/H3C3/H4C13/H4C3/H3C1
GOCC_ENDOLYSOSOME	GOCC_ENDOLYSOSOME	23	0.653949	1.86914	0.001635	0.0212816	0.0178141	8892	tags=39%, list=16%, signal=33%	HRG/CTSK/PCSK9/LDLR/LGMN/SMPD1/PRKCD/CLTC/TLR3
GOMF_OXIDOREDUCTASE_ACTIVITY_ACTING_ON_THE_CH_CH_GROUP_OF_DONORS_NAD_OR_NADP_AS_ACCEPTOR	GOMF_OXIDOREDUCTASE_ACTIVITY_ACTING_ON_THE_CH_CH_GROUP_OF_DONORS_NAD_OR_NADP_AS_ACCEPTOR	26	0.639024	1.86259	0.00163555	0.0212816	0.0178141	9141	tags=42%, list=16%, signal=36%	AKR1D1/AKR1C1/DHDH/TM7SF2/DHCR7/PECR/SRD5A2/BDH2/DECR1/BLVRA/PTGR1
GOBP_L_PHENYLALANINE_METABOLIC_PROCESS	GOBP_L_PHENYLALANINE_METABOLIC_PROCESS	11	0.809274	2.00347	0.00165965	0.0215524	0.0180408	6691	tags=64%, list=12%, signal=56%	TAT/PAH/QDPR/ASRGL1/HGD/GSTZ1/PCBD1
GOMF_C4_DICARBOXYLATE_TRANSMEMBRANE_TRANSPORTER_ACTIVITY	GOMF_C4_DICARBOXYLATE_TRANSMEMBRANE_TRANSPORTER_ACTIVITY	16	0.745506	1.97946	0.00167492	0.0217078	0.0181709	9958	tags=62%, list=18%, signal=52%	SLC13A2/SLC1A6/SLC1A1/SLC13A3/SLC13A5/SLC25A13/SLC25A11/SLC25A30/SLC25A12/SLC25A18
GOBP_GLYCOSYL_COMPOUND_METABOLIC_PROCESS	GOBP_GLYCOSYL_COMPOUND_METABOLIC_PROCESS	129	0.361637	1.40326	0.00168035	0.0217352	0.0181938	13499	tags=47%, list=24%, signal=36%	SLC34A1/AKR1C4/GNMT/DLG2/AKR1C1/TH/GBA3/AMD1/ACP3/HPRT1/ENPP4/AK3/MAGI3/ABHD10/LCMT2/MACROD1/UPP1/ADK/ADAL/CBR4/AKR1B1/UPB1/PUDP/PNP/OPA1/AKR7A2/NME5/CDADC1/MPP1/PRPSAP2/FUCA1/DCK/DNPH1/NT5C1B/UMPS/UPRT/PRPS2/ERH/GMPS/GBA2/DLG1/ATIC/RHOQ/DHFR2/AHCY/FUCA2/LRRK2/XDH/PPAT/GBA/DERA/AK4/NME6/PRPS1/RAN/MFN1/NT5C2/NT5C3A/GMPR2/EFL1/DPYS
GOMF_VITAMIN_B6_BINDING	GOMF_VITAMIN_B6_BINDING	55	0.488417	1.68941	0.00169654	0.0218897	0.0183231	9461	tags=44%, list=17%, signal=36%	ALB/TAT/AGXT/ETNPPL/DDC/GOT1/ABAT/AGXT2/GOT2/ALAS1/GPT2/SPTLC3/OAT/MTARC2/SDSL/GLDC/SPTLC2/PNPO/GPT/SHMT1/SDS/SPTLC1/KYNU/GCAT
GOBP_NEGATIVE_REGULATION_OF_MEGAKARYOCYTE_DIFFERENTIATION	GOBP_NEGATIVE_REGULATION_OF_MEGAKARYOCYTE_DIFFERENTIATION	18	0.713101	1.94902	0.00170111	0.0218897	0.0183231	2922	tags=33%, list=5%, signal=32%	H4C6/H4C4/H4C2/H4C1/H4C13/H4C3
GOBP_VASODILATION	GOBP_VASODILATION	36	0.563418	1.74593	0.00170231	0.0218897	0.0183231	1988	tags=14%, list=3%, signal=13%	CALCA/KNG1/ADRB1/CPS1/CASR
GOBP_SULFUR_COMPOUND_TRANSPORT	GOBP_SULFUR_COMPOUND_TRANSPORT	49	0.520428	1.74956	0.00172771	0.0221728	0.0185601	10079	tags=39%, list=18%, signal=32%	SLC26A7/SLC26A3/SLC26A4/SLC13A1/SLC19A2/SLC44A4/SLC7A9/SLC6A13/SLC19A3/SLC1A1/SLC26A9/SLC13A3/ABCG2/SLC25A11/SLC25A30/SLC33A1/SLC9A3R1/SLC25A26/LRRC8D
GOBP_PHOSPHATIDYLCHOLINE_METABOLIC_PROCESS	GOBP_PHOSPHATIDYLCHOLINE_METABOLIC_PROCESS	90	0.416891	1.52845	0.00173656	0.0222428	0.0186187	458	tags=7%, list=1%, signal=7%	PLA2G4F/APOA5/APOA1/APOA2/PON1/PLA2G3
GOBP_POSITIVE_REGULATION_OF_SMALL_MOLECULE_METABOLIC_PROCESS	GOBP_POSITIVE_REGULATION_OF_SMALL_MOLECULE_METABOLIC_PROCESS	140	0.368605	1.43979	0.00174085	0.0222544	0.0186284	6467	tags=21%, list=11%, signal=18%	APOA5/APOA1/PLA2G3/CYP7A1/FABP1/LHCGR/PFKFB2/CES1/PPARGC1A/AVPR1A/MIR103A1/MTCO2P12/PTH1R/ESRRB/ENTPD5/DGAT2/NOS2/PLIN5/GPD1/RGN/SLC4A4/GUCA2B/PRKCE/CLYBL/FGF1/NR4A3/PPARG/CPT1A/PRKAA2
GOBP_NEGATIVE_REGULATION_OF_LIPID_TRANSPORT	GOBP_NEGATIVE_REGULATION_OF_LIPID_TRANSPORT	44	0.536424	1.78096	0.00174791	0.0223011	0.0186675	8916	tags=34%, list=16%, signal=29%	APOC3/APOA2/MIR130B/EGF/MIR33A/PCSK9/CYP4F2/ABCG8/MIR27B/CRY1/AGTR2/SHH/MIR33B/MIR301B/FIS1
GOBP_MITOCHONDRIAL_ELECTRON_TRANSPORT_CYTOCHROME_C_TO_OXYGEN	GOBP_MITOCHONDRIAL_ELECTRON_TRANSPORT_CYTOCHROME_C_TO_OXYGEN	21	0.663888	1.88099	0.00175549	0.0223544	0.0187121	12711	tags=76%, list=22%, signal=59%	MTCO2P12/CYCS/NDUFA4/COX7B/COX5A/COX8A/COX7A2L/COX7C/AFG1L/COX6A1/COX4I1/COX6C/COX5B/COX10/COX15/COX4I2
GOBP_NEGATIVE_REGULATION_OF_FATTY_ACID_METABOLIC_PROCESS	GOBP_NEGATIVE_REGULATION_OF_FATTY_ACID_METABOLIC_PROCESS	34	0.587359	1.81576	0.00177038	0.0225003	0.0188342	6527	tags=29%, list=11%, signal=26%	APOC3/CYP7A1/MIR33A/SLC22A13/DGAT2/PLIN5/SOX9/CEACAM1/INSIG1/ACADL
GOBP_PYRIDINE_CONTAINING_COMPOUND_BIOSYNTHETIC_PROCESS	GOBP_PYRIDINE_CONTAINING_COMPOUND_BIOSYNTHETIC_PROCESS	35	0.563712	1.75809	0.00178285	0.0226149	0.0189302	10558	tags=43%, list=19%, signal=35%	NMRK2/SLC22A13/SLC5A8/NUDT12/QPRT/ACMSD/NAXE/IDH2/PNPO/NMNAT2/KYNU/ASPDH/NMNAT3/NMNAT1/RNLS
GOBP_STEROL_IMPORT	GOBP_STEROL_IMPORT	10	0.843178	2.02275	0.00178982	0.0226595	0.0189675	337	tags=30%, list=1%, signal=30%	APOC3/APOA1/APOA2
GOBP_POSITIVE_REGULATION_OF_PEPTIDE_SECRETION	GOBP_POSITIVE_REGULATION_OF_PEPTIDE_SECRETION	151	0.345214	1.35339	0.00180326	0.0227857	0.0190731	6810	tags=17%, list=12%, signal=15%	NR0B2/NKX6-1/CFTR/CRH/ADCYAP1/OXCT1/MYRIP/RBP4/PFKFB2/CASR/PDX1/ILDR1/CLTRN/VSNL1/UCN3/EXPH5/PCK2/PRKCE/F2RL1/EZR/ANKRD1/SELENOT/GLUD1/GPR27/PARD6A/WLS
GOBP_POSITIVE_REGULATION_OF_FATTY_ACID_METABOLIC_PROCESS	GOBP_POSITIVE_REGULATION_OF_FATTY_ACID_METABOLIC_PROCESS	38	0.550244	1.71875	0.00182108	0.0229666	0.0192245	6368	tags=29%, list=11%, signal=26%	APOA5/APOA1/PLA2G3/FABP1/PPARGC1A/AVPR1A/PLIN5/RGN/NR4A3/PPARG/CPT1A
GOBP_IRON_SULFUR_CLUSTER_ASSEMBLY	GOBP_IRON_SULFUR_CLUSTER_ASSEMBLY	23	0.648847	1.85456	0.00182735	0.0230014	0.0192537	12189	tags=61%, list=21%, signal=48%	GLRX5/ISCA2/HSPA9/FXN/CIAO2A/ISCA1/CIAPIN1/ISCU/NUBPL/IBA57/NUBP1/NFU1/NFS1/GLRX3
GOBP_ANION_HOMEOSTASIS	GOBP_ANION_HOMEOSTASIS	34	0.583819	1.80482	0.00183418	0.0230432	0.0192886	5998	tags=38%, list=11%, signal=34%	ATP6V1B1/OTC/UMOD/SLC12A3/SLC34A1/SLC12A1/CPS1/TFAP2B/SLC34A3/SLC1A1/ENPP1/CKB/SLC12A2
GOBP_HIGH_DENSITY_LIPOPROTEIN_PARTICLE_CLEARANCE	GOBP_HIGH_DENSITY_LIPOPROTEIN_PARTICLE_CLEARANCE	15	0.769022	1.98452	0.00185532	0.0232642	0.0194737	5943	tags=47%, list=10%, signal=42%	APOC3/APOA1/APOA2/MIR33A/APOM/CUBN/AMN
GOBP_REGULATION_OF_ORGANIC_ACID_TRANSPORT	GOBP_REGULATION_OF_ORGANIC_ACID_TRANSPORT	60	0.459234	1.60367	0.00186688	0.0233645	0.0195576	11289	tags=43%, list=20%, signal=35%	PLA2G3/SLC38A3/ARG1/CCK/CYP4A11/AVPR1A/CYP4F2/ACE2/CLTRN/ACSL1/SLC12A2/FABP3/STXBP1/AVPR1B/LEP/AGTR2/SLC43A1/PLA2G4A/FIS1/SLC43A2/PSEN1/PPARA/ARL6IP1/ARL6IP5/THBS1/NPY5R
GOBP_GLUCOSE_METABOLIC_PROCESS	GOBP_GLUCOSE_METABOLIC_PROCESS	209	0.331727	1.35563	0.001877	0.0234464	0.0196262	10897	tags=34%, list=19%, signal=28%	GCGR/ALDOB/RBP4/GNMT/PFKFB2/PDX1/KCNJ11/PPARGC1A/MIR103A1/PKLR/G6PC/TFAP2B/FBP1/GOT1/ESRRB/DGAT2/SORD/PCK1/KHK/GPD1/RGN/BPGM/GOT2/PCK2/PFKM/DLAT/MDH1/ENO3/PC/ENPP1/PDHA1/DCXR/CRY1/NLN/CPT1A/PDHB/PGM5/FAM3C/PMAIP1/LEP/ZMPSTE24/SLC25A13/SLC25A11/RANBP2/COX11/GPT/SLC25A12/PPP1CB/MLYCD/LRP5/SDHAF3/PGP/LEPR/DDB1/PDK2/SDS/PDK4/IGF1/PGAM1/OMA1/PPARA/SLC35B4/ARPP19/USP7/MDH2/PIK3CA/PGK1/ATF3/SELENOS/GSK3…
GOBP_SULFUR_COMPOUND_BIOSYNTHETIC_PROCESS	GOBP_SULFUR_COMPOUND_BIOSYNTHETIC_PROCESS	191	0.330376	1.36885	0.00192476	0.0239972	0.0200873	9529	tags=34%, list=17%, signal=28%	GSTA3/GGT6/ACAT1/UST/ELOVL4/ST3GAL4/B4GALT6/ACSL1/SCD5/ACSL6/AMD1/ST3GAL6/ACSBG1/GSTA1/DLD/ELOVL7/DSEL/CHAC1/PDP1/B3GNT3/HSD17B12/HSD17B8/DLAT/ANGPT1/GSTO2/PDHA1/CDO1/ACSL3/PDP2/GSTZ1/PDHX/APIP/CHAC2/GSTA2/PDHB/GGTLC1/MPC2/MAT2A/GCLC/CNDP2/BHMT/CBR4/B3GNT2/HACD2/ACSL4/ENOPH1/TPK1/HAGH/ACSS1/ST3GAL1/MGST2/MLYCD/GSTO1/MAT1A/MTHFD2L/GGTLC2/MAT2B/GSTP1/GCLM/GSTM3/PDK2/NFE2L2/GLCE/PDK4/GCDH
GOBP_REGULATION_OF_POTASSIUM_ION_TRANSPORT	GOBP_REGULATION_OF_POTASSIUM_ION_TRANSPORT	97	0.40027	1.49001	0.00195248	0.0242967	0.0203379	4685	tags=15%, list=8%, signal=14%	LRRC52/LRRC38/KCNE5/MTNR1B/ADCYAP1/DPP10/KCNA1/DPP6/WNK3/KCNE1B/NEDD4L/ANK3/KCNIP1/AMIGO1/CACNA1D
GOBP_MITOCHONDRIAL_ATP_SYNTHESIS_COUPLED_PROTON_TRANSPORT	GOBP_MITOCHONDRIAL_ATP_SYNTHESIS_COUPLED_PROTON_TRANSPORT	22	0.65115	1.85323	0.00196064	0.0243521	0.0203843	13224	tags=82%, list=23%, signal=63%	ATP5F1A/ATP5MC3/ATP5MG/ATP5F1B/ATP5ME/ATP5PF/ATP5PB/DMAC2L/ATPSCKMT/ATP5MC1/ATP5PO/ATP5F1C/STOML2/DNAJC30/ATP5PD/ATP5F1E/ANTKMT/ATP5F1D
GOBP_POSITIVE_REGULATION_OF_LIPID_LOCALIZATION	GOBP_POSITIVE_REGULATION_OF_LIPID_LOCALIZATION	109	0.377145	1.40554	0.00197076	0.0244314	0.0204507	7511	tags=24%, list=13%, signal=21%	CRH/APOA1/PON1/PLA2G3/CCK/VSTM2A/CES1/CYP4A11/AVPR1A/TAC1/CYP4F2/ABCA8/ACSL1/GALR1/PLIN5/ENPP7/FITM2/SLC12A2/FABP3/GAL/PLIN2/STXBP1/PRKCD/AVPR1B/ATP8A1/SCP2
GOBP_PROSTANOID_METABOLIC_PROCESS	GOBP_PROSTANOID_METABOLIC_PROCESS	48	0.530955	1.7425	0.00198584	0.0244978	0.0205062	4787	tags=21%, list=8%, signal=19%	PLA2G4F/PLA2G3/ATP6V1B1/AKR1C4/AVPR1A/AKR1C1/HPGD/PTGDS/PNPLA8/GSTA1
GOMF_TRANSLATION_INITIATION_FACTOR_ACTIVITY	GOMF_TRANSLATION_INITIATION_FACTOR_ACTIVITY	51	0.514556	1.73036	0.00198584	0.0244978	0.0205062	18054	tags=75%, list=32%, signal=51%	EIF1B/EIF4E/EIF5/EIF1AX/EIF3CL/DHX29/EIF4E1B/EIF2S3B/EIF2S1/EIF4E3/EIF3K/EIF3M/EIF4G2/EIF3J/EIF3A/EIF2A/EIF3L/MTIF3/EIF2B3/EIF4A2/EIF1/EIF2S2/EIF4G1/EIF6/EIF2B2/EIF4H/MTIF2/EIF3F/EIF3C/MCTS1/DENR/EIF2S3/EIF4E2/EIF3H/EIF4B/COPS5/EIF3E/EIF3D
GOBP_POSITIVE_REGULATION_OF_TRIGLYCERIDE_METABOLIC_PROCESS	GOBP_POSITIVE_REGULATION_OF_TRIGLYCERIDE_METABOLIC_PROCESS	22	0.649478	1.84848	0.00198732	0.0244978	0.0205062	5150	tags=32%, list=9%, signal=29%	APOA5/APOA1/AADAC/DGAT2/PLIN5/RGN/LDLR
GOBP_MEGAKARYOCYTE_DIFFERENTIATION	GOBP_MEGAKARYOCYTE_DIFFERENTIATION	100	0.392369	1.46953	0.00200359	0.024652	0.0206354	3116	tags=13%, list=5%, signal=12%	H4C6/KIT/H4C4/H4C2/SCIN/H3C11/H3C2/H3C7/H4C1/H3C3/H4C13/H4C3/H3C1
GOMF_ION_TRANSMEMBRANE_TRANSPORTER_ACTIVITY_PHOSPHORYLATIVE_MECHANISM	GOMF_ION_TRANSMEMBRANE_TRANSPORTER_ACTIVITY_PHOSPHORYLATIVE_MECHANISM	16	0.737676	1.95866	0.00200753	0.0246543	0.0206372	6891	tags=56%, list=12%, signal=49%	ATP4B/ATP12A/ABCB11/ATP4A/ATP2B3/ABCC4/ATP2B2/ATP6V1E1/ATP2C2
GOBP_TRANSCRIPTION_BY_RNA_POLYMERASE_III	GOBP_TRANSCRIPTION_BY_RNA_POLYMERASE_III	47	0.495203	1.64079	0.00201395	0.0246869	0.0206646	28724	tags=100%, list=51%, signal=50%	POLR2L/PRDX5/POLR2K/GTF3C4/SNAPC5/POLR3K/DHX36/SNAPC3/IVNS1ABP/POLR3F/ICE1/ICE2/SNAPC1/RO60/GTF3C6/GTF3C3/AR/POLR3H/MTOR/CRCP/GTF3C1/POLR1C/NAB2/BDP1/ZNF143/TBP/BRF2/RPTOR/CHD8/BRF1/GTF3A/GTF3C5/POLR3GL/MAF1/GTF3C2/POLR3C/ELL/POLR3G/BRCA1/ZNF76/POLR3D/SNAPC2/CEBPA/ZC3H8/SNAPC4/TENM1/ZNF345
GOBP_PROTEIN_AUTOPROCESSING	GOBP_PROTEIN_AUTOPROCESSING	24	0.638082	1.81167	0.00201926	0.024692	0.0206688	6557	tags=33%, list=12%, signal=30%	TMPRSS2/HJV/KLK6/PCSK9/IHH/F12/AFG3L2/FXN
GOBP_REGULATION_OF_RECEPTOR_MEDIATED_ENDOCYTOSIS	GOBP_REGULATION_OF_RECEPTOR_MEDIATED_ENDOCYTOSIS	104	0.389961	1.46126	0.00202369	0.024692	0.0206688	7479	tags=18%, list=13%, signal=16%	APOA5/APOC3/VTN/SH3GL2/PLCG2/EGF/APELA/PCSK9/ARC/DKK1/NECAB2/DNAJC6/ANGPT1/MIR27B/RSPO1/SNAP91/ATAD1/WASL/SCYL2
GOBP_THYROID_HORMONE_METABOLIC_PROCESS	GOBP_THYROID_HORMONE_METABOLIC_PROCESS	26	0.632719	1.84421	0.00202567	0.024692	0.0206688	4721	tags=38%, list=8%, signal=35%	SULT2A1/CGA/DIO1/CTSK/IYD/DUOX2/DUOXA2/CRYM/DUOXA1/SLC16A10
GOMF_PROTEIN_TRANSPORTER_ACTIVITY	GOMF_PROTEIN_TRANSPORTER_ACTIVITY	29	0.608736	1.83351	0.00204224	0.0248096	0.0207672	14972	tags=69%, list=26%, signal=51%	LRP2/TIMM10B/AZGP1/TIMM17A/TIMM8B/TIMM10/TIMM23/TOMM70/TOMM22/TOMM40L/IGF1R/TIMM23B/TMED10/TIMM22/TIMM9/TOMM20L/SEC63/TOMM20/MCL1/GPIHBP1
GOBP_REGULATION_OF_PROTEIN_BINDING	GOBP_REGULATION_OF_PROTEIN_BINDING	196	0.319915	1.32821	0.00204664	0.0248096	0.0207672	5985	tags=10%, list=11%, signal=9%	CFHR5/CFHR2/VTN/FRMD7/WFIKKN2/PRMT8/CFHR1/CSF3/PCSK9/XIRP1/SPON1/PLCL1/EPB41L5/BAMBI/PLCL2/DKK1/AMFR/ANGPT1/SORL1/MIR27B
GOBP_NUCLEOSIDE_TRIPHOSPHATE_METABOLIC_PROCESS	GOBP_NUCLEOSIDE_TRIPHOSPHATE_METABOLIC_PROCESS	108	0.381545	1.42991	0.00204666	0.0248096	0.0207672	13711	tags=52%, list=24%, signal=39%	AK5/PPARGC1A/ATP6V1A/PKLR/MTCO2P12/ATP5F1A/ATP5MC3/ATP5MG/ATP5F1B/AK3/ATP5ME/ENPP1/DCTPP1/ATP5PF/ATP5PB/ADK/DMAC2L/CTPS1/PRKAG2/SLC25A13/ATPSCKMT/PINK1/ATP5MC1/ATP5PO/LDHC/OPA1/SLC25A12/NME5/SMPDL3A/ATP5F1C/STOML2/DNAJC30/PPARA/ATP5PD/AK7/CMPK1/DUT/NUDT15/RHOQ/ATP5F1E/LRRK2/VCP/AK4/ALDOA/NME6/AK9/RAN/ANTKMT/MFN1/ENTPD3/CMPK2/ATP5F1D/EFL1/AK8/NUDT16/TBPL1
GOBP_GLYCINE_METABOLIC_PROCESS	GOBP_GLYCINE_METABOLIC_PROCESS	19	0.696061	1.93738	0.00206044	0.0249306	0.0208686	11377	tags=79%, list=20%, signal=63%	BAAT/AGXT/AGXT2/GLYAT/PHGDH/RIDA/SDSL/GLDC/SHMT1/SDS/GCAT/DHFRP1/DHFR/DHFR2/GCSH
GOBP_PURINE_NUCLEOBASE_METABOLIC_PROCESS	GOBP_PURINE_NUCLEOBASE_METABOLIC_PROCESS	19	0.694851	1.93401	0.00208636	0.0251656	0.0210653	13301	tags=74%, list=23%, signal=56%	TTR/URAD/GMPR/GDA/ACP3/HPRT1/SHMT1/GMPS/XDH/PPAT/PAICS/GART/PRPS1/GMPR2
GOBP_ER_NUCLEUS_SIGNALING_PATHWAY	GOBP_ER_NUCLEUS_SIGNALING_PATHWAY	53	0.497332	1.69094	0.00208754	0.0251656	0.0210653	12269	tags=51%, list=22%, signal=40%	AGR2/TMEM33/SPRING1/CCL2/AMFR/INSIG1/PPP1R15B/BOK/HERPUD1/CCDC47/LPCAT3/EIF2AK3/EIF2S1/NFE2L2/XBP1/ERLIN2/HSPA5/WFS1/ATF3/SELENOS/SREBF2/GSK3B/EIF2A/TMCO1/ERLIN1/DDIT3/MBTPS2
GOBP_ALDEHYDE_CATABOLIC_PROCESS	GOBP_ALDEHYDE_CATABOLIC_PROCESS	12	0.793243	1.98912	0.00210779	0.0253301	0.021203	8394	tags=50%, list=15%, signal=43%	ADH4/AGXT/AGXT2/HOGA1/ADH5/HAGH
GOBP_GLUTAMATE_METABOLIC_PROCESS	GOBP_GLUTAMATE_METABOLIC_PROCESS	33	0.590655	1.80703	0.00210891	0.0253301	0.021203	9879	tags=64%, list=17%, signal=53%	TAT/HAL/GOT1/ALDH5A1/ALDH4A1/AMDHD1/GOT2/PRODH/GLUD1/OAT/GLUD2/GCLC/PRODH2/MTHFS/SLC25A12/DGLUCY/GLS/NAGS/GCLM/FTCD/AADAT
GOBP_NUCLEAR_TRANSCRIBED_MRNA_CATABOLIC_PROCESS_NONSENSE_MEDIATED_DECAY	GOBP_NUCLEAR_TRANSCRIBED_MRNA_CATABOLIC_PROCESS_NONSENSE_MEDIATED_DECAY	120	0.374027	1.42483	0.00215875	0.0258754	0.0216594	33881	tags=99%, list=60%, signal=40%	ETF1/PPP2CA/GSPT1/GSPT2/RPS3A/NCBP1/SMG8/PNRC2/SECISBP2/NCBP2/RPS29/RPL15/PNLDC1/RPL21/RBM8A/RPS13/EIF4A3/UPF1/PPP2R2A/NBAS/EIF4G1/RPL22/PPP2R1A/RPS23/RPS27A/SMG5/RPL34/RPS6/RPS12/RPL26/RPS28/RPL9/SMG6/RPSA/RPL10A/EIF3E/RPL7/RPL27/RPS5/DCP1A/MAGOH/RPS21/RPS14/PARN/RPS4X/SMG7/CASC3/RPL24/RPS7/RPL31/RPL7A/RPL5/PYM1/RPS16/RPL35A/RNPS1/DCP2/RPL39/RPS9/RPS15A/UBA52/RPL27A/RPL3/RPL17/RPS3/SMG1/RPS25/RP…
GOBP_NUCLEOSIDE_TRIPHOSPHATE_BIOSYNTHETIC_PROCESS	GOBP_NUCLEOSIDE_TRIPHOSPHATE_BIOSYNTHETIC_PROCESS	83	0.409218	1.48484	0.0021622	0.0258754	0.0216594	13372	tags=51%, list=24%, signal=39%	AK5/PPARGC1A/ATP6V1A/PKLR/MTCO2P12/ATP5F1A/ATP5MC3/ATP5MG/ATP5F1B/AK3/ATP5ME/ATP5PF/ATP5PB/ADK/DMAC2L/CTPS1/PRKAG2/SLC25A13/ATPSCKMT/PINK1/ATP5MC1/ATP5PO/LDHC/SLC25A12/NME5/ATP5F1C/STOML2/DNAJC30/PPARA/ATP5PD/AK7/CMPK1/ATP5F1E/VCP/AK4/ALDOA/NME6/AK9/ANTKMT/CMPK2/ATP5F1D/AK8
GOCC_MICROVILLUS	GOCC_MICROVILLUS	91	0.423787	1.55359	0.00218358	0.0260836	0.0218337	8434	tags=36%, list=15%, signal=31%	AQP5/ATP6V1B1/MUC20/VIL1/SLC7A8/MYO7B/CA2/ATP6V1A/ANKS4B/DPEP1/KIF13B/IQGAP2/ENPP7/PDZK1/CDHR2/MYO6/PDPN/CEACAM1/ANGPT1/EZR/DCXR/RDX/ESPN/SLC27A4/MYO1H/ATP6V1E1/CLIC4/S100P/AKR1B1/PROM1/STARD10/CLCA1/MTTP
GOBP_POSITIVE_REGULATION_OF_MYELOID_LEUKOCYTE_MEDIATED_IMMUNITY	GOBP_POSITIVE_REGULATION_OF_MYELOID_LEUKOCYTE_MEDIATED_IMMUNITY	17	0.717627	1.92458	0.00226821	0.0270453	0.0226387	974	tags=18%, list=2%, signal=17%	STAP1/CD177/ARG1
GOBP_NEGATIVE_REGULATION_OF_ENDOTHELIAL_CELL_PROLIFERATION	GOBP_NEGATIVE_REGULATION_OF_ENDOTHELIAL_CELL_PROLIFERATION	66	0.460213	1.64677	0.00230427	0.0274254	0.0229569	6118	tags=23%, list=11%, signal=20%	MIR15A/APOH/CNMD/MIR30E/MIR494/MIR329-1/IL12B/MIR30B/ATP5F1A/CCL2/MIR222/MIR361/SYNJ2BP/MIR2355/PPARG
GOBP_ATP_BIOSYNTHETIC_PROCESS	GOBP_ATP_BIOSYNTHETIC_PROCESS	55	0.478832	1.65626	0.00232593	0.027633	0.0231307	13224	tags=58%, list=23%, signal=45%	PPARGC1A/ATP6V1A/PKLR/MTCO2P12/ATP5F1A/ATP5MC3/ATP5MG/ATP5F1B/ATP5ME/ATP5PF/ATP5PB/DMAC2L/PRKAG2/SLC25A13/ATPSCKMT/PINK1/ATP5MC1/ATP5PO/LDHC/SLC25A12/ATP5F1C/STOML2/DNAJC30/PPARA/ATP5PD/ATP5F1E/VCP/AK4/ALDOA/AK9/ANTKMT/ATP5F1D
GOMF_CATALYTIC_ACTIVITY_ACTING_ON_A_TRNA	GOMF_CATALYTIC_ACTIVITY_ACTING_ON_A_TRNA	122	0.359714	1.38	0.00233904	0.0277385	0.0232189	16586	tags=59%, list=29%, signal=42%	MARS2/LARS2/LCMT2/TRMT10C/DTWD2/NARS1/DTD2/NARS2/EARS2/TRMT61B/THUMPD3/QRSL1/TRMO/TRNT1/DARS2/TRMT1L/GATB/PRORP/TRMT9B/PARS2/TRMT6/MTFMT/TRMT12/FARS2/TRMT2B/RPP14/TRMT5/FARSB/TARS1/WARS2/IARS2/DARS1/PUS3/METTL2A/TYW3/MRPL58/RPP25/ALKBH1/PSTK/NT5C3A/POP4/TRMT10A/AARS1/PTRHD1/WARS1/ALKBH8/RPP40/VARS1/IARS1/GATC/METTL8/LARS1/RPP38/QTRT2/TYW1/RARS1/BCDIN3D/TRMT11/DUS4L/WDR4/PTRH2/RARS2/YARS2/DUS2/TRM…
GOBP_IRON_COORDINATION_ENTITY_TRANSPORT	GOBP_IRON_COORDINATION_ENTITY_TRANSPORT	14	0.746608	1.91858	0.00235944	0.02793	0.0233792	1286	tags=21%, list=2%, signal=21%	HRG/HPX/LCN2
GOBP_C21_STEROID_HORMONE_METABOLIC_PROCESS	GOBP_C21_STEROID_HORMONE_METABOLIC_PROCESS	40	0.550293	1.74808	0.00236984	0.0279712	0.0234137	3394	tags=20%, list=6%, signal=19%	CYP17A1/DHRS2/AKR1C4/AKR1D1/CYP11A1/PPARGC1A/AKR1C1/FDX1
GOBP_ARGININE_METABOLIC_PROCESS	GOBP_ARGININE_METABOLIC_PROCESS	19	0.688288	1.91574	0.00237145	0.0279712	0.0234137	6915	tags=47%, list=12%, signal=42%	OTC/ARG1/NOS2/ARG2/DDAH1/AGMAT/SLC39A8/SLC7A7/OAT
GOBP_HETEROCHROMATIN_ORGANIZATION	GOBP_HETEROCHROMATIN_ORGANIZATION	80	0.417955	1.523	0.00240047	0.0282626	0.0236577	3660	tags=15%, list=6%, signal=14%	H4C6/H4C4/H4C2/H3C11/H3C2/H3C7/H4C1/H3C3/H4C13/H4C3/H3C1/PRDM16
GOBP_NEGATIVE_REGULATION_OF_SYSTEMIC_ARTERIAL_BLOOD_PRESSURE	GOBP_NEGATIVE_REGULATION_OF_SYSTEMIC_ARTERIAL_BLOOD_PRESSURE	16	0.730817	1.94045	0.00241141	0.0283405	0.0237228	821	tags=19%, list=1%, signal=18%	CALCA/CRH/ADRB1
GOBP_WATER_HOMEOSTASIS	GOBP_WATER_HOMEOSTASIS	79	0.441508	1.58137	0.00243378	0.0285164	0.0238701	9825	tags=41%, list=17%, signal=34%	CFTR/ATP6V1B1/UMOD/AQP2/FA2H/SCNN1A/CYP4A11/TFAP2B/CLDN4/NEDD4L/CYP4F2/MYO5B/KDF1/GRHL1/GRHL3/AQP1/RAB11FIP2/PRKAR1A/AKR1B1/ADCY1/PRKACB/SFN/TRPV4/ALOXE3/AQP4/SRF/RAB11A/ADCY5/PRKAR2A/AQP11/ADCY9/WFS1
GOBP_INTERMEMBRANE_LIPID_TRANSFER	GOBP_INTERMEMBRANE_LIPID_TRANSFER	46	0.511841	1.6857	0.00243942	0.0285164	0.0238701	9535	tags=33%, list=17%, signal=27%	APOA1/APOA2/TTPA/TNFAIP8L3/GRAMD1C/ABCG8/GLTPD2/PRELID3B/GLTP/OSBP/OSBPL8/MTTP/PLEKHA3/CERT1/CETP
GOMF_LIPID_TRANSFER_ACTIVITY	GOMF_LIPID_TRANSFER_ACTIVITY	46	0.511841	1.6857	0.00243942	0.0285164	0.0238701	9535	tags=33%, list=17%, signal=27%	APOA1/APOA2/TTPA/TNFAIP8L3/GRAMD1C/ABCG8/GLTPD2/PRELID3B/GLTP/OSBP/OSBPL8/MTTP/PLEKHA3/CERT1/CETP
GOMF_TRANSMEMBRANE_RECEPTOR_PROTEIN_SERINE_THREONINE_KINASE_ACTIVITY	GOMF_TRANSMEMBRANE_RECEPTOR_PROTEIN_SERINE_THREONINE_KINASE_ACTIVITY	19	0.687483	1.9135	0.0024492	0.0285304	0.0238818	2133	tags=21%, list=4%, signal=20%	HJV/BMPR1B/SOSTDC1/ACVR1C
GOBP_TRICARBOXYLIC_ACID_METABOLIC_PROCESS	GOBP_TRICARBOXYLIC_ACID_METABOLIC_PROCESS	14	0.743265	1.90999	0.00244932	0.0285304	0.0238818	11320	tags=64%, list=20%, signal=51%	SLC34A1/IDH3A/ACO2/ACO1/GLUD1/IDH2/CS/ACLY/IREB2
GOMF_SULFUR_COMPOUND_TRANSMEMBRANE_TRANSPORTER_ACTIVITY	GOMF_SULFUR_COMPOUND_TRANSMEMBRANE_TRANSPORTER_ACTIVITY	48	0.525113	1.72333	0.00247082	0.0287299	0.0240488	9033	tags=38%, list=16%, signal=32%	SLC26A7/SLC26A3/SLC26A4/SLC13A1/SLC19A2/SLC44A4/SLC7A9/SLC6A13/SLC19A3/SLC1A1/SLC26A9/ABCC4/SLC13A3/ABCG2/SLC25A11/SLC25A30/ABCC6/SLC33A1
GOBP_MESONEPHROS_DEVELOPMENT	GOBP_MESONEPHROS_DEVELOPMENT	91	0.421003	1.54339	0.00249306	0.0289371	0.0242222	9775	tags=40%, list=17%, signal=33%	CALB1/BMP7/CER1/SLIT2/GPC3/SOX8/WNT11/TACSTD2/SFRP1/FOXJ1/SIX4/CAT/ARG2/NPNT/LGR4/LHX1/PBX1/REN/SOX9/SDC4/FGF1/ADAMTS16/FOXC1/SDC1/SIX1/FMN1/AGTR2/BMP2/SHH/SALL1/WNT9B/AGT/RARB/SMAD5/BCL2/SMAD4
GOBP_REGULATION_OF_VASCULAR_ASSOCIATED_SMOOTH_MUSCLE_CELL_DIFFERENTIATION	GOBP_REGULATION_OF_VASCULAR_ASSOCIATED_SMOOTH_MUSCLE_CELL_DIFFERENTIATION	23	0.638752	1.82571	0.00251431	0.0291322	0.0243856	4386	tags=17%, list=8%, signal=16%	FGF9/KIT/MIR100/MIR221
GOBP_BODY_FLUID_SECRETION	GOBP_BODY_FLUID_SECRETION	86	0.411855	1.49375	0.00252359	0.0291882	0.0244324	6973	tags=24%, list=12%, signal=21%	SERPINC1/CHRM1/AQP5/CEL/AGR2/PRLR/NEURL1/ERBB4/TAC1/MTCO2P12/SLC4A5/GOT2/SLC22A2/PRKCE/CDO1/CHRM3/AQP1/VAMP8/SOCS2/CCND1/SLC22A4
GOCC_IMMUNOGLOBULIN_COMPLEX_CIRCULATING	GOCC_IMMUNOGLOBULIN_COMPLEX_CIRCULATING	69	-0.563965	-1.5334	0.00261069	0.0301424	0.0252311	12745	tags=58%, list=22%, signal=45%	IGHM/IGHV4-34/IGHV4-4/IGLC2/IGHA2/IGHG2/IGHV3-15/IGHG1/IGHV3-72/IGLC6/IGHV3-16/IGHV3-23/IGHV4-61/IGHV3-11/IGHV5-10-1/IGHV7-4-1/IGHV3-33/IGHV3-21/IGHV3-35/IGHV3-43/IGKV3-20/IGHV7-81/IGHV1-18/IGHV2-5/IGHV5-51/IGHV3-64D/IGHV4-39/IGHV2-26/IGHV1-69D/IGHV3-13/IGHG4/IGHV3-48/IGHV3-20/IGHV1-45/IGHV1OR15-1/IGHV4-59/IGHV4-28/IGHV2-70/IGHV1-69-2/IGHV3-73
GOMF_MONOCARBOXYLATE_SODIUM_SYMPORTER_ACTIVITY	GOMF_MONOCARBOXYLATE_SODIUM_SYMPORTER_ACTIVITY	15	0.757833	1.95564	0.00268392	0.0308662	0.025837	6892	tags=60%, list=12%, signal=53%	SLC10A1/SLC1A6/SLC5A8/SLC10A2/SLC6A13/SLC1A1/SLC10A5/SLC1A2/SLC6A12
GOMF_ALDO_KETO_REDUCTASE_NADP_ACTIVITY	GOMF_ALDO_KETO_REDUCTASE_NADP_ACTIVITY	27	0.608413	1.78192	0.00268587	0.0308662	0.025837	8820	tags=48%, list=16%, signal=41%	ADH4/AKR1C4/RDH12/AKR1D1/MIOX/AKR1C1/AKR7A3/RDH11/RDH14/AKR1B1/RDH10/AKR7A2/SPR
GOBP_POSITIVE_REGULATION_OF_POTASSIUM_ION_TRANSMEMBRANE_TRANSPORTER_ACTIVITY	GOBP_POSITIVE_REGULATION_OF_POTASSIUM_ION_TRANSMEMBRANE_TRANSPORTER_ACTIVITY	24	0.630774	1.79092	0.0026875	0.0308662	0.025837	6411	tags=29%, list=11%, signal=26%	LRRC52/LRRC38/KCNA1/AMIGO1/ANK2/KCNC2/GAL
GOMF_OXYGEN_BINDING	GOMF_OXYGEN_BINDING	39	0.529472	1.66991	0.00269707	0.030922	0.0258838	3834	tags=23%, list=7%, signal=22%	ALB/CYP17A1/CYP2A7/CYP1A1/CYP3A4/NGB/TH/MB/CYP3A7
GOMF_LIPASE_INHIBITOR_ACTIVITY	GOMF_LIPASE_INHIBITOR_ACTIVITY	18	0.700012	1.91324	0.00270991	0.031015	0.0259616	4425	tags=33%, list=8%, signal=31%	APOC3/APOA1/APOA2/SNCB/ANGPTL3/ANXA3
GOCC_RIBOSOMAL_SUBUNIT	GOCC_RIBOSOMAL_SUBUNIT	187	0.331399	1.37744	0.00275785	0.0315086	0.0263748	30352	tags=95%, list=53%, signal=45%	MRPL53/MRPL34/MRPS28/MRPL50/MRPS35/NDUFAB1/MRPS36/LARP4/MRPL44/MRPL19/MRPL15/MRPL49/MRPL35/MRPS30/MRPL13/MRPS16/MRPS22/MRPL3/DHX29/MRPL1/MRPS18A/MRPL47/MRPL54/MRPS18B/DDX3X/MRPL48/MRPS9/MRPS10/MRPL30/MRPS33/MPV17L2/MRPL42/RPS3A/MRPL45/MRPL41/MRPL39/MALSU1/RSL24D1/MRPL4/MRPL16/MRPL32/MRPL21/MRPS14/MRPS31/EIF2A/MRPS7/MRPL22/RPL36AL/MRPL14/MRPS18C/RPS29/RPL15/HBA2/MRPL11/MRPL12/MRPS2/MRPL58/MRPS5/RP…
GOCC_MITOCHONDRIAL_SMALL_RIBOSOMAL_SUBUNIT	GOCC_MITOCHONDRIAL_SMALL_RIBOSOMAL_SUBUNIT	28	0.618731	1.82217	0.00276408	0.0315249	0.0263884	13868	tags=71%, list=24%, signal=54%	MRPS28/MRPS35/MRPS36/MRPS16/MRPS22/MRPS18A/MRPS18B/MRPS9/MRPS10/MRPS33/MRPL42/MRPS14/MRPS31/MRPS7/MRPS18C/MRPS2/MRPS5/MRPS12/MRPS17/MRPS27
GOBP_CELLULAR_RESPONSE_TO_HEAT	GOBP_CELLULAR_RESPONSE_TO_HEAT	120	0.369187	1.40639	0.00278131	0.0316663	0.0265068	14503	tags=47%, list=26%, signal=35%	CAMK2B/BAG1/ARPP21/HSPH1/HSP90AA1/FGF1/HSPA8/SLC52A3/CXCL10/BAG5/TRPV4/RANBP2/DNAJB1/CLPB/MAPT/TCIM/HSP90AB3P/SEH1L/EIF2S1/RPA3/NUP35/SUMO1/MAPK1/BAG3/HSBP1/TFEC/GSK3B/STUB1/DHX36/THBS1/YWHAE/BAG4/NUP58/NUP160/HDAC2/PDCL3/ATR/NUP98/VCP/PTGES3/NUP153/SIRT1/BAG2/CDKN1A/CRYAB/RBBP7/CAMK2D/HSP90AB2P/HSPA1L/CHORDC1/NUP88/NUP133/NUP50/NUP205/NUP37/NUP54
GOBP_FIBRINOLYSIS	GOBP_FIBRINOLYSIS	25	0.63992	1.84734	0.00280816	0.0319167	0.0267163	1836	tags=20%, list=3%, signal=19%	HRG/APOH/CPB2/F11/PLG
GOBP_ENDOPLASMIC_RETICULUM_ORGANIZATION	GOBP_ENDOPLASMIC_RETICULUM_ORGANIZATION	86	0.40966	1.48578	0.00282845	0.0320917	0.0268628	15152	tags=60%, list=27%, signal=44%	UMOD/TMEM38A/TRDN/TMEM38B/TMEM33/RTN4/RAB18/MMGT1/ATL2/REEP1/EMC3/REEP5/SHTN1/REEP3/CCDC47/EMC6/GET1/LPCAT3/EIF2AK3/POLR2M/RAB10/CERT1/TMEM170A/TRAM1/TRAM1L1/RTN3/ARL6IP1/EMC8/GET3/EMC7/LNPK/VAPB/LRRK2/STX18/BNIP1/EMC4/JAGN1/ZBED3/SEC16A/TOR1B/LMAN1/LMAN2L/ESYT1/VCPIP1/SPTSSB/EMC2/EMC10/ATL3/UBL4A/RAB3GAP2/SEC31A/ESYT3
GOMF_POTASSIUM_ION_ANTIPORTER_ACTIVITY	GOMF_POTASSIUM_ION_ANTIPORTER_ACTIVITY	16	0.721176	1.91486	0.00284115	0.0321801	0.0269368	564	tags=19%, list=1%, signal=19%	SLC9A4/SLC24A2/SLC9A2
GOBP_POSITIVE_REGULATION_OF_VIRAL_RELEASE_FROM_HOST_CELL	GOBP_POSITIVE_REGULATION_OF_VIRAL_RELEASE_FROM_HOST_CELL	14	0.737187	1.89437	0.00285378	0.0322442	0.0269905	10705	tags=64%, list=19%, signal=52%	PC/CHMP2B/TSG101/VAPA/DDB1/VPS37B/VPS4B/CHMP3/CHMP4C
GOCC_PROTON_TRANSPORTING_V_TYPE_ATPASE_V0_DOMAIN	GOCC_PROTON_TRANSPORTING_V_TYPE_ATPASE_V0_DOMAIN	10	0.828903	1.98851	0.00285731	0.0322442	0.0269905	86	tags=20%, list=0%, signal=20%	ATP6V0A4/ATP6V0D2
GOBP_REGULATION_OF_URINE_VOLUME	GOBP_REGULATION_OF_URINE_VOLUME	21	0.642985	1.82177	0.00286156	0.0322442	0.0269905	3042	tags=24%, list=5%, signal=23%	SLC4A1/UMOD/TRPV5/BTC/TFAP2B
GOBP_NEGATIVE_REGULATION_OF_LIPID_LOCALIZATION	GOBP_NEGATIVE_REGULATION_OF_LIPID_LOCALIZATION	61	0.463597	1.63204	0.00288734	0.0324789	0.0271869	8916	tags=34%, list=16%, signal=29%	APOC3/APOA2/MIR130B/EGF/MIR33A/CES1/PCSK9/CYP4F2/TTC39B/ABCG8/MIR27B/PPARG/CRY1/ABHD5/LEP/AGTR2/SHH/OSBPL8/MIR33B/MIR301B/FIS1
GOBP_RESPONSE_TO_AMINO_ACID_STARVATION	GOBP_RESPONSE_TO_AMINO_ACID_STARVATION	49	0.504573	1.69626	0.00289717	0.0325336	0.0272327	16559	tags=67%, list=29%, signal=48%	DAPL1/RRAGD/RNF152/SESN3/EIF2AK3/SEH1L/EIF2S1/RRAGA/MAPK1/MAP1LC3A/IMPACT/ATF3/MAPK8/BMT2/PRKD1/DAP/EIF2A/RRAGC/SESN1/CDKN1A/FAS/MAP3K5/C12orf66/MIOS/EIF2AK2/LARS1/RRAGB/LARP1/TFEB/MTOR/BECN1/SLC38A2/SESN2
GOBP_REGULATION_OF_CELLULAR_RESPONSE_TO_VASCULAR_ENDOTHELIAL_GROWTH_FACTOR_STIMULUS	GOBP_REGULATION_OF_CELLULAR_RESPONSE_TO_VASCULAR_ENDOTHELIAL_GROWTH_FACTOR_STIMULUS	27	0.606057	1.77502	0.00292595	0.0328006	0.0274563	4182	tags=19%, list=7%, signal=17%	HRG/MIR329-1/IL12B/CCBE1/CADM4
GOBP_HIGH_DENSITY_LIPOPROTEIN_PARTICLE_ASSEMBLY	GOBP_HIGH_DENSITY_LIPOPROTEIN_PARTICLE_ASSEMBLY	15	0.756184	1.95139	0.00296893	0.033211	0.0277998	337	tags=20%, list=1%, signal=20%	APOA5/APOA1/APOA2
GOBP_GLYCOSIDE_METABOLIC_PROCESS	GOBP_GLYCOSIDE_METABOLIC_PROCESS	21	0.640609	1.81504	0.00297269	0.033211	0.0277998	9407	tags=48%, list=17%, signal=40%	SLC34A1/AKR1C4/AKR1C1/TH/GBA3/ABHD10/CBR4/AKR1B1/AKR7A2/FUCA1
GOBP_PEPTIDYL_METHIONINE_MODIFICATION	GOBP_PEPTIDYL_METHIONINE_MODIFICATION	13	0.760698	1.93014	0.00298861	0.0333321	0.0279011	337	tags=15%, list=1%, signal=15%	APOA1/APOA2
GOBP_MULTICELLULAR_ORGANISMAL_RESPONSE_TO_STRESS	GOBP_MULTICELLULAR_ORGANISMAL_RESPONSE_TO_STRESS	67	0.4422	1.58648	0.00300099	0.0334134	0.0279692	3889	tags=13%, list=7%, signal=13%	CALCA/CRH/SLC6A2/ADRB1/ADCYAP1/CCK/TAC1/HTR2C/DPP4
GOBP_REGULATION_OF_CELL_SUBSTRATE_JUNCTION_ORGANIZATION	GOBP_REGULATION_OF_CELL_SUBSTRATE_JUNCTION_ORGANIZATION	69	0.426387	1.54231	0.00301479	0.0335102	0.0280502	12448	tags=33%, list=22%, signal=26%	HRG/SFRP1/EPB41L5/SDC4/ARHGAP6/DUSP3/FMN1/PTPRJ/MAPRE2/LIMCH1/DMTN/SLK/CAMSAP3/ARF6/TEK/RHOA/CLASP2/FAM107A/THBS1/FERMT2/KDR/PIK3R1/PTEN
GOBP_REGULATION_OF_SMOOTH_MUSCLE_CELL_DIFFERENTIATION	GOBP_REGULATION_OF_SMOOTH_MUSCLE_CELL_DIFFERENTIATION	39	0.527003	1.66212	0.00302289	0.0335433	0.028078	5444	tags=15%, list=10%, signal=14%	FGF9/KIT/MIR100/EREG/MIR221/RBPMS2
GOBP_RESPONSE_TO_CORTICOSTEROID	GOBP_RESPONSE_TO_CORTICOSTEROID	152	0.332649	1.30722	0.00303	0.0335654	0.0280965	7639	tags=24%, list=13%, signal=21%	TRIM63/CRH/TAT/AGXT/ADCYAP1/ARG1/CPN1/CPS1/HSD11B2/BCHE/PDX1/SLIT2/AVPR1A/GOT1/TH/SSTR5/CSN1S1/FOSB/PCK1/ANXA3/ACSBG1/UCN3/PCK2/CDO1/AQP1/AGL/SDC1/GLB1/EIF4E/CCND1/FOXO1/FIBIN/FOSL1/FECH/AGTR2/KRAS
GOBP_SUBSTANTIA_NIGRA_DEVELOPMENT	GOBP_SUBSTANTIA_NIGRA_DEVELOPMENT	43	0.515399	1.71159	0.00303514	0.0335657	0.0280967	12308	tags=53%, list=22%, signal=42%	FGF9/SYNGR3/MBP/NDRG2/CKB/SYPL2/GLUD1/PLP1/ATP5PF/ATP5PB/POTEE/H2BS1/NDUFS3/CALM2/HSPA5/MAPKAP1/RHOA/ZNF148/YWHAE/CDC42/RAD1/YWHAQ/CALM1
GOBP_RESPONSE_TO_THYROID_HORMONE	GOBP_RESPONSE_TO_THYROID_HORMONE	23	0.628223	1.79561	0.00306524	0.0337963	0.0282897	9220	tags=48%, list=16%, signal=40%	SLC34A1/F7/KIT/PPARGC1A/THRB/RDX/AKR1B1/CAB39/KLF9/GCLM/CTSH
GOBP_NEGATIVE_REGULATION_OF_GENE_EXPRESSION_EPIGENETIC	GOBP_NEGATIVE_REGULATION_OF_GENE_EXPRESSION_EPIGENETIC	124	0.368476	1.41902	0.0030663	0.0337963	0.0282897	5154	tags=17%, list=9%, signal=15%	H4C6/H1-5/H4C4/H4C2/H3C11/H3C2/H3C7/H4C1/H2AC21/H1-1/H1-4/H3C3/H4C13/H1-3/H4C3/H3C1/H2AC12/H2AC4/H2AP/HMGA1/H2AW
GOBP_NEGATIVE_REGULATION_OF_CELL_PROJECTION_ORGANIZATION	GOBP_NEGATIVE_REGULATION_OF_CELL_PROJECTION_ORGANIZATION	178	0.334746	1.36083	0.00310529	0.0341687	0.0286014	3255	tags=8%, list=6%, signal=7%	HRG/STAP1/INPP5J/OMG/NTN1/MAG/FSTL4/NEU4/SLIT2/TACSTD2/SEMA3D/MIR30B/PFN2/RAP1GAP
GOBP_REACTIVE_OXYGEN_SPECIES_BIOSYNTHETIC_PROCESS	GOBP_REACTIVE_OXYGEN_SPECIES_BIOSYNTHETIC_PROCESS	119	0.357327	1.36066	0.00313731	0.0344631	0.0288478	10734	tags=28%, list=19%, signal=23%	PAGE4/CYP1A2/SLC18A2/CYP1A1/DUOX2/DUOXA2/MTCO2P12/CCN6/AGXT2/DUOXA1/SLC25A33/NOS2/ARG2/RGN/DDAH1/KLF4/HSP90AA1/MTARC2/ACOX1/AGTR2/MPV17L/CLCN3/CD36/SPR/NOX4/SLC30A10/HBB/PPARA/MIR132/CLU/SLC5A3/CYB5B/GCH1
GOBP_NONRIBOSOMAL_PEPTIDE_BIOSYNTHETIC_PROCESS	GOBP_NONRIBOSOMAL_PEPTIDE_BIOSYNTHETIC_PROCESS	19	0.678672	1.88898	0.00320361	0.0351326	0.0294083	9294	tags=53%, list=16%, signal=44%	GGT6/CHAC1/CHAC2/BDH2/GCLC/CNDP2/HAGH/MGST2/GCLM/NFE2L2
GOMF_SODIUM_CHLORIDE_SYMPORTER_ACTIVITY	GOMF_SODIUM_CHLORIDE_SYMPORTER_ACTIVITY	11	0.789174	1.95371	0.0032129	0.0351757	0.0294443	2088	tags=45%, list=4%, signal=44%	SLC6A2/SLC12A3/SLC18A2/SLC12A1/SLC6A4
GOMF_VOLTAGE_GATED_ANION_CHANNEL_ACTIVITY	GOMF_VOLTAGE_GATED_ANION_CHANNEL_ACTIVITY	17	0.70492	1.8905	0.00324912	0.0355129	0.0297266	8622	tags=41%, list=15%, signal=35%	CLCNKB/CLCNKA/CLCN5/CLCN4/SLC17A3/VDAC1/CLCN3
GOBP_RESPONSE_TO_ETHER	GOBP_RESPONSE_TO_ETHER	13	0.757698	1.92253	0.00325825	0.0355534	0.0297605	3223	tags=23%, list=6%, signal=22%	CRH/PPARGC1A/TH
GOBP_VESICLE_LOCALIZATION	GOBP_VESICLE_LOCALIZATION	223	0.311674	1.30477	0.00328314	0.0357655	0.0299381	15631	tags=56%, list=27%, signal=40%	GPR143/MYO7B/SLC2A4/HAP1/LIN7A/F8A2/AP1M2/MYO5B/F5/ARL6/MYO6/CD59/BICDL1/SAR1B/MKKS/MYO1H/CCDC186/SNAP91/AP1AR/CUL3/CHP1/RAB17/WASL/CNIH1/PPP6C/KIF1A/FOLR1/PINK1/SEC24A/MREG/TRAPPC6A/FBXW11/C17orf75/CDH3/RAB1A/FAM91A1/RAB11A/PICALM/FYCO1/KIF3B/PCLO/TRAK2/NAPA/PSEN1/TRIP11/SEC23IP/KIF5B/TRAPPC4/TMEM230/STARD3NL/WIPI1/F8/FNBP1L/BLOC1S2/TRAPPC6B/USO1/AP3S2/SCFD1/ARFGAP3/SEC24B/AP3B1/TOR1A/CLASP2/NSF…
GOBP_TRNA_MODIFICATION	GOBP_TRNA_MODIFICATION	88	0.409896	1.48893	0.00329955	0.0358648	0.0300211	33587	tags=100%, list=59%, signal=41%	TRUB1/LCMT2/TRMT10C/DTWD2/DPH3/ELP3/TRMT61B/THUMPD3/TRMO/ELP4/TRMT1L/PRORP/TRMT9B/TRMT6/MTFMT/TRMT12/KTI12/TRMT2B/TRMT5/THUMPD1/PUS3/METTL2A/TYW3/MOCS3/ALKBH1/TPRKB/SSB/ELP6/TRMT10A/AARS1/HSD17B10/ALKBH8/MTO1/ELP1/C9orf64/METTL8/QTRT2/TYW1/BCDIN3D/TRMT11/DUS4L/WDR4/ELP5/DUS2/TRMT61A/CDKAL1/METTL1/TRDMT1/NSUN2/TYW5/THADA/URM1/NAT10/METTL2B/TRMT112/ELP2/NSUN3/OSGEPL1/DTWD1/PUS7/METTL6/CTU2/ADAT3/TH…
GOBP_POSITIVE_REGULATION_OF_VOLTAGE_GATED_POTASSIUM_CHANNEL_ACTIVITY	GOBP_POSITIVE_REGULATION_OF_VOLTAGE_GATED_POTASSIUM_CHANNEL_ACTIVITY	14	0.734255	1.88684	0.00330319	0.0358648	0.0300211	1113	tags=21%, list=2%, signal=21%	LRRC52/LRRC38/KCNA1
GOBP_UREA_METABOLIC_PROCESS	GOBP_UREA_METABOLIC_PROCESS	13	0.755648	1.91733	0.00334813	0.0362926	0.0303793	5255	tags=38%, list=9%, signal=35%	OTC/ARG1/CPS1/ARG2/SLC25A15
GOBP_PROTEIN_MANNOSYLATION	GOBP_PROTEIN_MANNOSYLATION	23	0.622844	1.78024	0.0033966	0.0367573	0.0307683	17062	tags=74%, list=30%, signal=52%	LARGE2/CRPPA/POMGNT2/NUS1/TMTC3/DPM1/DPY19L4/SDF2L1/B4GAT1/RXYLT1/FKTN/TMTC2/POMT2/FKRP/POMT1/LARGE1/TMTC1
GOBP_KETONE_BODY_METABOLIC_PROCESS	GOBP_KETONE_BODY_METABOLIC_PROCESS	12	0.775773	1.94531	0.00341085	0.0368022	0.0308058	4415	tags=58%, list=8%, signal=54%	OXCT1/HMGCS2/TYRP1/ACAT1/BDH1/ACSS3/SLC27A5
GOBP_CELLULAR_GLUCURONIDATION	GOBP_CELLULAR_GLUCURONIDATION	19	0.674349	1.87695	0.00341198	0.0368022	0.0308058	8423	tags=58%, list=15%, signal=49%	UGT2B15/UGT2B4/UGT1A4/UGT2B28/UGT1A9/PRKCE/UGT1A7/ABHD10/UGT2A1/UGT2A3/UGT1A6
GOBP_BIOLOGICAL_PROCESS_INVOLVED_IN_INTERACTION_WITH_SYMBIONT	GOBP_BIOLOGICAL_PROCESS_INVOLVED_IN_INTERACTION_WITH_SYMBIONT	90	0.406727	1.49119	0.00342149	0.0368442	0.030841	2814	tags=10%, list=5%, signal=10%	HRG/CFHR5/CFHR2/ARG1/CFHR1/PLG/REG3G/LRRC19/CXCL6
GOBP_FATTY_ACID_TRANSMEMBRANE_TRANSPORT	GOBP_FATTY_ACID_TRANSMEMBRANE_TRANSPORT	50	0.486001	1.638	0.00343177	0.0368505	0.0308462	10617	tags=46%, list=19%, signal=37%	THRSP/SLC1A6/GRM1/ACSL1/SLC27A5/KCNJ10/SLC1A1/SLC17A7/ABCD3/SLC1A2/CPT1A/PRKAA2/CPT2/PRKAG2/SLC25A13/SLC25A20/CLN8/SLC25A12/CD36/PSEN1/SLC25A18/ARL6IP1/ARL6IP5
GOBP_HEPATICOBILIARY_SYSTEM_DEVELOPMENT	GOBP_HEPATICOBILIARY_SYSTEM_DEVELOPMENT	140	0.355914	1.39021	0.00343585	0.0368505	0.0308462	7696	tags=21%, list=14%, signal=18%	BAAT/OTC/CPB2/ARG1/CYP1A1/CPS1/PDX1/PCSK9/ZIC3/ALDH1A2/PTPN3/COBL/IHH/PCK1/RGN/SOX9/QDPR/PCK2/CEACAM1/FGF1/GNPNAT1/CPT1A/FGL1/HMGCS1/CCND1/CUL3/MAN2A1/KRAS/ZMPSTE24
GOBP_ONE_CARBON_METABOLIC_PROCESS	GOBP_ONE_CARBON_METABOLIC_PROCESS	40	0.537324	1.70688	0.00343893	0.0368505	0.0308462	11530	tags=55%, list=20%, signal=44%	CA10/GNMT/CA2/AHCYL2/CA4/ALDH1L1/CA3/CA5A/MAT2A/MTHFS/MAT1A/MTHFD2L/MAT2B/SHMT1/CA13/FTCD/SFXN1/DHFRP1/DHFR/DHFR2/CA8/AHCY
GOBP_REGULATION_OF_ENDOPLASMIC_RETICULUM_STRESS_INDUCED_INTRINSIC_APOPTOTIC_SIGNALING_PATHWAY	GOBP_REGULATION_OF_ENDOPLASMIC_RETICULUM_STRESS_INDUCED_INTRINSIC_APOPTOTIC_SIGNALING_PATHWAY	30	0.590521	1.77228	0.00347649	0.0371343	0.0310839	15069	tags=53%, list=27%, signal=39%	PDX1/PMAIP1/BOK/HERPUD1/OPA1/EIF2AK3/CREB3/TMBIM6/XBP1/SELENOS/LRRK2/DDIT3/SIRT1/RNF183/ERP29/BCL2L1
GOCC_TRANSPORT_VESICLE_MEMBRANE	GOCC_TRANSPORT_VESICLE_MEMBRANE	201	0.324421	1.32158	0.00347674	0.0371343	0.0310839	11407	tags=34%, list=20%, signal=28%	SCG3/SYT10/ATP6V1B1/UNC13C/SH3GL2/AQP2/SYNGR3/SV2B/SLC18A2/DGKI/SYT9/SVOP/SYT8/SV2C/BSN/CA4/GABRA2/SYT3/SLC17A7/SYT7/NCALD/TMED7/CEACAM1/SORL1/SYNPR/SYPL1/SCAMP1/CD59/SYPL2/SAR1B/AFTPH/RAB11FIP5/SLC17A5/SEC23B/SCGN/SCAMP5/CNIH1/HLA-G/FOLR1/VTI1B/SEC24A/UNC13B/MAP6/AP1G1/CLTC/RAB1A/B2M/SLC6A17/ICA1/TMEM30A/SEC23IP/CBARP/SLC30A8/HLA-DQA2/RAB5A/TPRG1L/CLTA/LAMP1/PTPRN2/USO1/VMA21/SREBF2/SEC24B/RAB4A…
GOMF_PRIMARY_ACTIVE_TRANSMEMBRANE_TRANSPORTER_ACTIVITY	GOMF_PRIMARY_ACTIVE_TRANSMEMBRANE_TRANSPORTER_ACTIVITY	62	0.454407	1.59161	0.00349549	0.0372739	0.0312007	8862	tags=29%, list=16%, signal=25%	CFTR/ABCB5/ATP12A/ABCB11/ABCA4/ATP4A/ABCA8/ATP1A1/ABCA6/ABCG8/ABCD3/ABCC4/ABCG2/LMBRD1/ABCB1/ATP7B/ABCB10/ABCC6
GOBP_NEGATIVE_REGULATION_OF_EPITHELIAL_CELL_PROLIFERATION	GOBP_NEGATIVE_REGULATION_OF_EPITHELIAL_CELL_PROLIFERATION	150	0.346366	1.37062	0.00350446	0.0373089	0.03123	6385	tags=18%, list=11%, signal=16%	MIR15A/APOH/CPB2/CNMD/MIR30E/MIR494/MIR329-1/EREG/GPC3/SFRP1/IL12B/MIR30B/ATP5F1A/KDF1/MARVELD3/VDR/RGN/SOX9/CCL2/MIR222/CEACAM1/MIR361/SYNJ2BP/MIR2355/PPARG/PBLD/MTSS1
GOBP_RESPONSE_TO_ALKALOID	GOBP_RESPONSE_TO_ALKALOID	98	0.381326	1.42854	0.00352177	0.0374323	0.0313333	6428	tags=23%, list=11%, signal=21%	CRH/TMEM38A/SLC34A1/TACR3/BCHE/PPP1R1B/PDX1/PPARGC1A/CRHBP/TAC1/DDC/TH/ABAT/TMEM38B/FOSB/HOMER1/GOT2/UQCRC1/PRKCE/SMPD1/PPARG/CPT1A/CACNA1S
GOMF_LIPASE_ACTIVITY	GOMF_LIPASE_ACTIVITY	130	0.356695	1.37663	0.00353941	0.037559	0.0314393	6780	tags=23%, list=12%, signal=20%	PLA2G4F/CHRM1/PNLIPRP3/PLA2G3/CEL/AADAC/PLCG2/CES1/CASR/PLAAT5/PLCZ1/LIPH/PLCL1/ABHD3/ABHD2/PNPLA8/PLCL2/ENPP7/LYPLA1/PLAAT2/PNPLA4/CES5A/ABHD6/SMPD1/CHRM3/LYPLAL1/GDE1/NOTUM/PLCH2/PLA1A
GOBP_STEROID_CATABOLIC_PROCESS	GOBP_STEROID_CATABOLIC_PROCESS	26	0.616253	1.79622	0.00358882	0.0379607	0.0317756	3701	tags=27%, list=7%, signal=25%	CYP1A2/CYP7A1/CEL/CYP3A4/HSD17B6/AKR1D1/CYP39A1
GOBP_POSITIVE_REGULATION_OF_ENDOCYTOSIS	GOBP_POSITIVE_REGULATION_OF_ENDOCYTOSIS	97	0.387064	1.44086	0.00358885	0.0379607	0.0317756	3270	tags=9%, list=6%, signal=9%	APOA5/STAP1/VTN/PLCG2/EGF/APELA/GPC3/PCSK9/NEDD4L
GOBP_POSITIVE_REGULATION_OF_CELL_SUBSTRATE_JUNCTION_ORGANIZATION	GOBP_POSITIVE_REGULATION_OF_CELL_SUBSTRATE_JUNCTION_ORGANIZATION	30	0.588414	1.76596	0.00359955	0.0380126	0.031819	10121	tags=33%, list=18%, signal=27%	HRG/SFRP1/EPB41L5/SDC4/DUSP3/FMN1/PTPRJ/MAPRE2/ARF6/TEK
GOBP_REGULATION_OF_CHOLESTEROL_METABOLIC_PROCESS	GOBP_REGULATION_OF_CHOLESTEROL_METABOLIC_PROCESS	61	0.456363	1.60658	0.00366375	0.0385847	0.0322979	13035	tags=49%, list=23%, signal=38%	CYP7A1/CES1/SC5D/TTC39B/FMO5/DGAT2/TM7SF2/IDI1/FGF1/DHCR7/CYP51A1/ACADL/HMGCS1/EPHX2/HMGCR/LPCAT3/GPAM/FDFT1/ARV1/ERLIN2/SREBF2/PRKAA1/GGPS1/ERLIN1/MBTPS2/SOD1/SQLE/ELOVL6/RAN/APOB
GOMF_MONOCARBOXYLIC_ACID_BINDING	GOMF_MONOCARBOXYLIC_ACID_BINDING	71	0.421366	1.53201	0.00366549	0.0385847	0.0322979	9202	tags=39%, list=16%, signal=33%	ALB/AKR1C4/FABP1/SERPINA5/AKR1C1/PCCA/AFP/AFM/VDR/UGT1A9/PTGDS/GSTA1/ACOX2/PC/UGT1A7/NDUFAB1/FABP3/PPARG/ACOX1/ADH5/CYP26C1/STX3/SCP2/NAPEPLD/MCCC1/GSTP1/FABP4/DBT
GOBP_PROTEIN_QUALITY_CONTROL_FOR_MISFOLDED_OR_INCOMPLETELY_SYNTHESIZED_PROTEINS	GOBP_PROTEIN_QUALITY_CONTROL_FOR_MISFOLDED_OR_INCOMPLETELY_SYNTHESIZED_PROTEINS	28	0.608492	1.79202	0.0036733	0.038605	0.0323149	15729	tags=68%, list=28%, signal=49%	FBXL17/CUL3/KLHL15/UBE2W/ZYG11B/OMA1/RNF185/RNF5/STUB1/TOR1A/ZER1/LONP2/SDF2L1/VCP/YME1L1/NGLY1/UGGT1/UGGT2/POMT2
GOMF_CARBON_CARBON_LYASE_ACTIVITY	GOMF_CARBON_CARBON_LYASE_ACTIVITY	51	0.490046	1.64794	0.00369565	0.03873	0.0324195	9018	tags=39%, list=16%, signal=33%	CYP17A1/ALDOB/URAD/DDC/GOT1/DDT/AMD1/PCK1/ACMSD/PCK2/FAHD1/CLYBL/ODC1/HOGA1/ME1/HACL1/ECHDC1/MLYCD/UXS1/SHMT1
GOBP_DEVELOPMENTAL_PIGMENTATION	GOBP_DEVELOPMENTAL_PIGMENTATION	44	0.516378	1.7144	0.003697	0.03873	0.0324195	10102	tags=39%, list=18%, signal=32%	TYR/GPR143/KIT/TYRP1/SLC45A2/IHH/ATP6AP2/KITLG/EDNRB/ENPP1/GNA11/SPNS2/AP1G1/MREG/RAB32/BCL2/MITF
GOCC_LOW_DENSITY_LIPOPROTEIN_PARTICLE	GOCC_LOW_DENSITY_LIPOPROTEIN_PARTICLE	13	0.752686	1.90981	0.00370766	0.0387796	0.0324611	5150	tags=38%, list=9%, signal=35%	APOA1/APOF/APOM/APOO/LDLR
GOMF_PEROXISOME_PROLIFERATOR_ACTIVATED_RECEPTOR_BINDING	GOMF_PEROXISOME_PROLIFERATOR_ACTIVATED_RECEPTOR_BINDING	12	0.771121	1.93364	0.003715	0.0387946	0.0324736	2070	tags=17%, list=4%, signal=16%	NR0B2/PPARGC1A
GOBP_REGULATION_OF_REACTIVE_OXYGEN_SPECIES_METABOLIC_PROCESS	GOBP_REGULATION_OF_REACTIVE_OXYGEN_SPECIES_METABOLIC_PROCESS	188	0.316789	1.3074	0.00372633	0.0388294	0.0325028	11315	tags=34%, list=20%, signal=27%	PAGE4/CD177/BMP7/SLC18A2/DUOXA2/NNT/MTCO2P12/CCN6/ACE2/AGXT2/PON3/DUOXA1/SLC25A33/PLIN5/ARG2/RGN/HP/DDAH1/PRDX2/KLF4/F2RL1/AGTR1/HSP90AA1/MIR27B/NOXO1/PRCP/PRKCD/LEP/TUSC2/AGTR2/PINK1/VDAC1/SIRT5/GADD45A/MPV17L/MAPT/CLCN3/CD36/AGT/GSTP1/BCO2/NFE2L2/ATG5/NOX4/SLC30A10/BCL2/HBB/PPARA/MIR132/CLU/SLC5A3/DHFRP1/HIF1A/TGFBR2/F2/SELENOS/GCH1/BNIP3/COQ7/SNCA/DHFR/NQO2/THBS1/ARF4
GOBP_POSITIVE_REGULATION_OF_RECEPTOR_MEDIATED_ENDOCYTOSIS	GOBP_POSITIVE_REGULATION_OF_RECEPTOR_MEDIATED_ENDOCYTOSIS	50	0.483887	1.63088	0.00373018	0.0388294	0.0325028	2462	tags=12%, list=4%, signal=11%	APOA5/VTN/PLCG2/EGF/APELA/PCSK9
GOBP_POSITIVE_REGULATION_OF_PHAGOCYTOSIS	GOBP_POSITIVE_REGULATION_OF_PHAGOCYTOSIS	65	0.457254	1.60684	0.0037434	0.0389052	0.0325662	337	tags=6%, list=1%, signal=6%	STAP1/AHSG/APOA1/APOA2
GOBP_PROTEIN_TRANSMEMBRANE_IMPORT_INTO_INTRACELLULAR_ORGANELLE	GOBP_PROTEIN_TRANSMEMBRANE_IMPORT_INTO_INTRACELLULAR_ORGANELLE	36	0.534514	1.65636	0.0037536	0.0389495	0.0326033	15086	tags=64%, list=27%, signal=47%	AIFM1/PEX7/TIMM17A/HSPD1/DNAJC19/CHCHD4/PEX2/GRPEL1/TIMM21/TIMM23/TOMM70/PEX12/PEX13/TOMM40L/LONP2/TIMM23B/PEX1/DNAJC15/PEX26/TOMM20L/TOMM20/TIMM50/GRPEL2
GOCC_ENDOPEPTIDASE_COMPLEX	GOCC_ENDOPEPTIDASE_COMPLEX	68	0.444699	1.60628	0.0037608	0.0389626	0.0326143	15998	tags=63%, list=28%, signal=45%	PSME3/UBQLN1/RAD23B/PIGK/TXNL1/USP14/PSMD14/IDE/PSMD10/PSMD6/PIGS/PSMC6/UCHL5/PSMD12/UBE3A/UBR1/PSMD1/PSMB5/VCP/PSME4/PSMD7/PSMA3/PSMA7/PSMC2/UBE3C/PSME1/PSMA1/PSMA5/ZFAND2B/PSMB6/PSMA4/PSMD5/PIGU/PSMD11/PSMB8/DNAJB2/PSMB7/PSMB1/PSMD2/PSMC4/ECPAS/HTRA2/PSMC1
GOBP_STRESS_FIBER_ASSEMBLY	GOBP_STRESS_FIBER_ASSEMBLY	102	0.389876	1.46063	0.00377635	0.039062	0.0326974	7101	tags=15%, list=12%, signal=13%	APOA1/FRMD7/PPM1E/WNT11/TACSTD2/SFRP1/TAC1/PFN2/FHDC1/SDC4/LPAR1/ARHGAP6/MKKS/CGNL1/CUL3
GOMF_CATION_CHLORIDE_SYMPORTER_ACTIVITY	GOMF_CATION_CHLORIDE_SYMPORTER_ACTIVITY	17	0.698805	1.8741	0.00380322	0.039278	0.0328783	2088	tags=29%, list=4%, signal=28%	SLC6A2/SLC12A3/SLC18A2/SLC12A1/SLC6A4
GOBP_COENZYME_A_METABOLIC_PROCESS	GOBP_COENZYME_A_METABOLIC_PROCESS	15	0.745179	1.92299	0.00387147	0.03992	0.0334156	11502	tags=67%, list=20%, signal=53%	ACAT1/PANK1/HMGCR/MCCC2/NUDT7/CROT/PANK3/PPCS/ACLY/ACOT7
GOBP_FLUID_TRANSPORT	GOBP_FLUID_TRANSPORT	31	0.57023	1.72305	0.00390719	0.040162	0.0336182	738	tags=13%, list=1%, signal=13%	AQP6/CFTR/AQP5/AQP2
GOMF_ACID_THIOL_LIGASE_ACTIVITY	GOMF_ACID_THIOL_LIGASE_ACTIVITY	31	0.570487	1.72383	0.00390719	0.040162	0.0336182	11247	tags=58%, list=20%, signal=47%	ACSS3/SLC27A2/ACSL1/ACSL6/SUCLG1/SLC27A5/ACSBG1/ACSM2B/SUCLA2/ACSL3/SLC27A4/SUCLG2/ACSM2A/ACSL4/ACSS1/ACSM3/ACSM5/ACSF2
GOCC_PRERIBOSOME	GOCC_PRERIBOSOME	77	0.406428	1.47485	0.00392177	0.0401717	0.0336263	26002	tags=96%, list=46%, signal=52%	SRFBP1/NIP7/UTP4/UTP3/ZNF622/UTP20/RRS1/RIOK3/UTP18/IMP3/WDR12/XRCC5/RRP15/WDR36/RRP36/DCAF13/BYSL/NOP9/EBNA1BP2/RPF1/MAK16/NOL6/RIOK1/RIOK2/SNU13/KRR1/WDR3/UTP23/NSA2/FCF1/NOL10/RRP9/NGDN/FTSJ3/LTV1/EIF6/EMG1/NOP14/PRKDC/TBL3/IMP4/NOP58/UTP11/TSR1/FP565260.1/NOB1/RRP7A/FBXW9/PES1/WDR46/MPHOSPH10/BMS1/UTP25/RSL1D1/FAM207A/MDN1/RPS7/PDCD11/RRP1B/HEATR1/PPAN/WDR74/WDR37/UTP6/UTP14A/LAS1L/NOC2L/MRTO…
GOCC_PROTON_TRANSPORTING_TWO_SECTOR_ATPASE_COMPLEX_CATALYTIC_DOMAIN	GOCC_PROTON_TRANSPORTING_TWO_SECTOR_ATPASE_COMPLEX_CATALYTIC_DOMAIN	18	0.687873	1.88006	0.00392554	0.0401717	0.0336263	11832	tags=78%, list=21%, signal=62%	ATP6V1B1/ATP6V1C2/ATP6V1A/ATP5F1A/ATP5F1B/ATP6V1H/ATP6V1E1/ATP5PO/ATP6V1C1/ATP5F1C/ATP6V1F/ATP5F1E/ATP6V1B2/ATP6AP1
GOBP_ENDOTHELIAL_CELL_PROLIFERATION	GOBP_ENDOTHELIAL_CELL_PROLIFERATION	178	0.330984	1.34554	0.00392651	0.0401717	0.0336263	6118	tags=15%, list=11%, signal=13%	MIR15A/APOA1/APOH/CNMD/ARG1/EGF/APELA/MIR30E/FGFBP1/MIR494/MIR329-1/NOX5/IL12B/MIR30B/ALDH1A2/ATP5F1A/WNT2/CCL2/MIR29A/AGTR1/MIR222/MIR361/SYNJ2BP/MIR2355/MIR27B/PPARG
GOBP_POLYOL_CATABOLIC_PROCESS	GOBP_POLYOL_CATABOLIC_PROCESS	26	0.610059	1.77816	0.00395071	0.0403563	0.0337809	14489	tags=73%, list=25%, signal=54%	INPP5J/MIOX/GK/IMPA2/SORD/BPNT1/BPNT2/GPD2/IMPA1/INPP1/GK5/NTSR1/PTEN/MTMR2/INPP5A/OCRL/TKFC/SYNJ1/NUDT3
GOMF_LIGASE_ACTIVITY_FORMING_CARBON_SULFUR_BONDS	GOMF_LIGASE_ACTIVITY_FORMING_CARBON_SULFUR_BONDS	41	0.537208	1.72071	0.00398775	0.0406713	0.0340446	12628	tags=59%, list=22%, signal=46%	ACSS3/SLC27A2/ACSL1/ACSL6/SUCLG1/SLC27A5/ACSBG1/ACSM2B/SUCLA2/ACSL3/SLC27A4/SUCLG2/ACSM2A/ACSL4/ACSS1/UBA5/ACSM3/UBA3/ACSM5/ACSF2/NAE1/ACSS2/UBA1/MOCS3
GOBP_PTERIDINE_CONTAINING_COMPOUND_BIOSYNTHETIC_PROCESS	GOBP_PTERIDINE_CONTAINING_COMPOUND_BIOSYNTHETIC_PROCESS	15	0.74369	1.91915	0.00401398	0.0408753	0.0342153	12623	tags=87%, list=22%, signal=67%	QDPR/PCBD1/PTS/MTHFS/SPR/DHFRP1/GCH1/ATIC/DHFR/DHFR2/MTHFD1/PCBD2/GART
GOMF_VOLTAGE_GATED_CHLORIDE_CHANNEL_ACTIVITY	GOMF_VOLTAGE_GATED_CHLORIDE_CHANNEL_ACTIVITY	11	0.783689	1.94013	0.00403147	0.0409897	0.0343111	542	tags=18%, list=1%, signal=18%	CLCNKB/CLCNKA
GOBP_REGULATION_OF_LIPASE_ACTIVITY	GOBP_REGULATION_OF_LIPASE_ACTIVITY	97	0.385189	1.43388	0.0040584	0.041082	0.0343883	1102	tags=6%, list=2%, signal=6%	APOA5/APOC3/APOA1/APOA2/APOH/KIT
GOBP_AMELOGENESIS	GOBP_AMELOGENESIS	23	0.615403	1.75897	0.00405934	0.041082	0.0343883	1833	tags=17%, list=3%, signal=17%	KLK4/AMTN/AMELX/ENAM
GOMF_BILE_ACID_TRANSMEMBRANE_TRANSPORTER_ACTIVITY	GOMF_BILE_ACID_TRANSMEMBRANE_TRANSPORTER_ACTIVITY	20	0.65499	1.85863	0.00405934	0.041082	0.0343883	6960	tags=50%, list=12%, signal=44%	SLCO1B1/AKR1C4/SLC10A1/ABCB11/SLC51B/SLC10A2/SLC10A5/CEACAM1/SLC51A/SLCO1A2
GOBP_ERBB2_SIGNALING_PATHWAY	GOBP_ERBB2_SIGNALING_PATHWAY	32	0.555662	1.68655	0.00408509	0.0412301	0.0345123	13382	tags=53%, list=24%, signal=41%	EGF/ERBB4/EREG/NRG2/BTC/NRG4/HSP90AA1/CUL5/ERBB2/PTPRR/CPNE3/PIK3CA/STUB1/ERBIN/PIK3R1/GAB1/PRKCA
GOMF_CHANNEL_INHIBITOR_ACTIVITY	GOMF_CHANNEL_INHIBITOR_ACTIVITY	38	0.523273	1.6345	0.00408655	0.0412301	0.0345123	3549	tags=18%, list=6%, signal=17%	CFTR/AMBP/PCSK9/KCNV1/WNK3/NEDD4L/KCNMB2
GOBP_PROTEIN_O_LINKED_MANNOSYLATION	GOBP_PROTEIN_O_LINKED_MANNOSYLATION	18	0.686539	1.87642	0.00412814	0.0415858	0.03481	17062	tags=83%, list=30%, signal=58%	LARGE2/CRPPA/POMGNT2/TMTC3/DPM1/SDF2L1/B4GAT1/RXYLT1/FKTN/TMTC2/POMT2/FKRP/POMT1/LARGE1/TMTC1
GOBP_RESPONSE_TO_MERCURY_ION	GOBP_RESPONSE_TO_MERCURY_ION	11	0.782555	1.93732	0.00415425	0.0417208	0.034923	916	tags=27%, list=2%, signal=27%	TAT/AQP2/SLC34A1
GOMF_ASPARTIC_TYPE_PEPTIDASE_ACTIVITY	GOMF_ASPARTIC_TYPE_PEPTIDASE_ACTIVITY	25	0.625378	1.80536	0.00415427	0.0417208	0.034923	4712	tags=20%, list=8%, signal=18%	PIP/PGC/NAPSA/NRIP3/REN
GOMF_CHLORIDE_CHANNEL_REGULATOR_ACTIVITY	GOMF_CHLORIDE_CHANNEL_REGULATOR_ACTIVITY	16	0.7053	1.8727	0.00417813	0.0418963	0.03507	2931	tags=19%, list=5%, signal=18%	BSND/CFTR/WNK3
GOCC_CATALYTIC_STEP_2_SPLICEOSOME	GOCC_CATALYTIC_STEP_2_SPLICEOSOME	87	0.392737	1.43079	0.00419256	0.0419631	0.0351258	28555	tags=97%, list=50%, signal=48%	PPIL1/SNRPD3/BCAS2/LSM3/MTREX/SRSF1/DDX5/PLRG1/HNRNPF/CRNKL1/HNRNPM/SNRPN/HNRNPK/FRG1/SYNCRIP/AQR/SNRPD1/CWC22/CDC40/SNRPG/TFIP11/SNRNP40/HNRNPR/CDC5L/RBM8A/SF3B6/ALYREF/EIF4A3/HNRNPA3/HNRNPU/SNRPB2/SLU7/SF3A1/HNRNPC/PRPF19/DHX8/LSM2/CWC27/PRPF4B/SNRPE/SF3B2/PRPF8/SNRNP200/CWC15/SNW1/RBM22/DHX35/RBMX/MAGOH/SNRPB/SF3B1/EFTUD2/PRPF6/BUD31/SF3B3/SF3A3/SYF2/SNRPD2/HNRNPA2B1/PPIL3/PNN/DDX23/RALY/HNRNP…
GOBP_POSITIVE_REGULATION_OF_CELL_SUBSTRATE_ADHESION	GOBP_POSITIVE_REGULATION_OF_CELL_SUBSTRATE_ADHESION	121	0.350734	1.34144	0.00419864	0.0419631	0.0351258	5768	tags=12%, list=10%, signal=11%	HRG/APOA1/VWC2/OLFM4/AGR2/SFRP1/COL26A1/EPB41L5/NPNT/FERMT1/DMP1/ITGA6/HSD17B12/PRKCE/SDC4
GOBP_MONOVALENT_INORGANIC_ANION_HOMEOSTASIS	GOBP_MONOVALENT_INORGANIC_ANION_HOMEOSTASIS	15	0.741091	1.91244	0.00420399	0.0419631	0.0351258	1146	tags=27%, list=2%, signal=26%	ATP6V1B1/UMOD/SLC12A3/SLC12A1
GOMF_FMN_BINDING	GOMF_FMN_BINDING	16	0.704946	1.87176	0.00422588	0.0421175	0.0352551	4383	tags=25%, list=8%, signal=23%	HAO1/IYD/HAO2/NOS2
GOBP_REGULATION_OF_GENERATION_OF_PRECURSOR_METABOLITES_AND_ENERGY	GOBP_REGULATION_OF_GENERATION_OF_PRECURSOR_METABOLITES_AND_ENERGY	159	0.341745	1.33927	0.00427789	0.0425712	0.0356349	13062	tags=42%, list=23%, signal=32%	GCGR/SLC4A1/PFKFB2/PPARGC1A/FBP1/COX7A1/ESRRB/PRDM16/ENTPD5/SLC25A33/NOS2/KHK/GPD1/PDE12/SLC4A4/GHITM/ENPP1/PPIF/COX7A2/PRKAA2/CISD1/TACO1/COX7A2L/PRKAG2/ATPSCKMT/ISCU/PINK1/RANBP2/SLC25A12/PPP1CB/SEH1L/COX17/ATP7A/PSEN1/NUP35/DNAJC30/IGF1/PNPT1/PGAM1/PPARA/CHCHD2/PIK3CA/IDE/APP/HIF1A/PRKAG1/SELENOS/UQCC2/BNIP3/GSK3B/PRKAA1/SNCA/NUP58/DNAJC15/NUP160/PRELID1/NUP98/PRXL2C/VCP/NUP153/AK4/ZBTB20/PPP1…
GOCC_APICOLATERAL_PLASMA_MEMBRANE	GOCC_APICOLATERAL_PLASMA_MEMBRANE	21	0.630199	1.78554	0.0043062	0.0427879	0.0358163	4664	tags=24%, list=8%, signal=22%	CLDN8/CLDN6/OCLN/CLDN4/CLDN7
GOBP_CELL_MIGRATION_INVOLVED_IN_SPROUTING_ANGIOGENESIS	GOBP_CELL_MIGRATION_INVOLVED_IN_SPROUTING_ANGIOGENESIS	82	0.402365	1.45243	0.00440528	0.043689	0.0365705	5985	tags=16%, list=11%, signal=14%	MIR15A/MIR188/MIR200C/FGFBP1/MIR494/MIR329-1/SLIT2/MIR221/KLF4/ADTRP/MIR361/MIR2355/MIR27B
GOBP_DISTAL_TUBULE_DEVELOPMENT	GOBP_DISTAL_TUBULE_DEVELOPMENT	12	0.764843	1.9179	0.0044102	0.043689	0.0365705	3042	tags=33%, list=5%, signal=32%	UMOD/CALB1/KLHL3/TFAP2B
GOBP_REGULATION_OF_OSSIFICATION	GOBP_REGULATION_OF_OSSIFICATION	111	0.352858	1.33228	0.00443712	0.0438867	0.036736	5023	tags=14%, list=9%, signal=12%	CALCA/AHSG/BMPR1B/BMP7/SOST/GFRA4/SFRP1/TAC1/KL/ADGRV1/MIR208A/PBX1/SGMS2/SOX9/DKK1
GOBP_NEPHRON_EPITHELIUM_DEVELOPMENT	GOBP_NEPHRON_EPITHELIUM_DEVELOPMENT	106	0.372626	1.39902	0.00444355	0.0438867	0.036736	9775	tags=35%, list=17%, signal=29%	UMOD/CALB1/NPHS2/GPC3/SOX8/WNT11/IRX1/TACSTD2/KLHL3/FOXJ1/SIX4/TFAP2B/NPHS1/NPNT/LGR4/LHX1/PBX1/SOX9/FGF1/ADAMTS16/KLF15/MTSS1/FOXC1/SIX1/FMN1/AGTR2/BMP2/PROM1/SHH/SALL1/WNT9B/AGT/MAGI2/AQP11/CD24/BCL2/SMAD4
GOBP_REGULATION_OF_MITOCHONDRIAL_FISSION	GOBP_REGULATION_OF_MITOCHONDRIAL_FISSION	27	0.588617	1.72394	0.00449354	0.0443138	0.0370935	12205	tags=63%, list=21%, signal=49%	PPARGC1A/MUL1/TMEM135/MARCHF5/PINK1/MAPT/FIS1/MIEF1/VPS35/BNIP3/MIEF2/MFF/MCU/SPIRE1/KDR/LRRK2/DNM1L
GOMF_TRANSFERASE_ACTIVITY_TRANSFERRING_NITROGENOUS_GROUPS	GOMF_TRANSFERASE_ACTIVITY_TRANSFERRING_NITROGENOUS_GROUPS	23	0.608123	1.73816	0.00450117	0.0443223	0.0371007	8347	tags=52%, list=15%, signal=45%	TAT/AGXT/ETNPPL/GOT1/ABAT/AGXT2/GOT2/GATM/GPT2/OAT/GFPT1/GPT
GOCC_TRICARBOXYLIC_ACID_CYCLE_ENZYME_COMPLEX	GOCC_TRICARBOXYLIC_ACID_CYCLE_ENZYME_COMPLEX	14	0.723641	1.85956	0.00451659	0.044396	0.0371624	9202	tags=79%, list=16%, signal=66%	OGDHL/BCKDHB/SUCLG1/DLD/SUCLA2/FH/SUCLG2/MRPS36/OGDH/DLST/DBT
GOBP_NON_RECOMBINATIONAL_REPAIR	GOBP_NON_RECOMBINATIONAL_REPAIR	106	0.372121	1.39713	0.00452219	0.044396	0.0371624	11544	tags=25%, list=20%, signal=20%	DNTT/H4C6/H4C4/H4C2/H4C1/H4C13/H4C3/RBBP8/SETMAR/NUDT16L1/NHEJ1/SHLD3/USP51/H4C5/UBE2N/SHLD2/LIG4/RNF138/SUMO1/BRCC3/PSMD14/ERCC4/ERCC8/XRCC5/DCLRE1A/RNF8/UBE2V2
GOBP_REGULATION_OF_MITOCHONDRIAL_OUTER_MEMBRANE_PERMEABILIZATION_INVOLVED_IN_APOPTOTIC_SIGNALING_PATHWAY	GOBP_REGULATION_OF_MITOCHONDRIAL_OUTER_MEMBRANE_PERMEABILIZATION_INVOLVED_IN_APOPTOTIC_SIGNALING_PATHWAY	44	0.509804	1.69258	0.00454707	0.0445735	0.0373109	14174	tags=57%, list=25%, signal=43%	SLC25A5/ACAA2/SLC35F6/CHCHD10/MUL1/PMAIP1/BOK/TMEM14A/FZD9/SFN/MPV17L/BCL2/MAPK8/GSK3B/YWHAB/TFDP2/TP73/YWHAE/YWHAQ/TFDP1/PPP1R13B/YWHAH/BAK1/TMEM102/TP53BP2
GOMF_MODIFIED_AMINO_ACID_TRANSMEMBRANE_TRANSPORTER_ACTIVITY	GOMF_MODIFIED_AMINO_ACID_TRANSMEMBRANE_TRANSPORTER_ACTIVITY	21	0.62804	1.77943	0.00458401	0.0448686	0.0375579	6973	tags=38%, list=12%, signal=33%	SLC19A2/SLC6A20/SLC7A9/SLC22A16/SLC6A13/SLC13A3/SLC16A12/SLC22A4
GOBP_ACTIN_FILAMENT_BUNDLE_ORGANIZATION	GOBP_ACTIN_FILAMENT_BUNDLE_ORGANIZATION	155	0.33817	1.325	0.00466068	0.0455511	0.0381292	11841	tags=30%, list=21%, signal=24%	APOA1/FRMD7/PPM1E/PFN3/VIL1/WNT11/TACSTD2/SFRP1/TAC1/PFN2/AIF1L/FHDC1/PLS1/SDC4/EZR/RDX/LPAR1/ARHGAP6/ESPN/LIMA1/MKKS/CGNL1/EPS8/CUL3/SHTN1/BAIAP2/LIMCH1/DMTN/SRF/PPP1R9A/FAM171A1/NOX4/CX3CL1/CARMIL1/RGCC/RHOA/RHOD/CLASP2/PDXP/SPIRE1/FAM107A/USH1C/CDC42/FERMT2/BAG4/BAIAP2L2
GOBP_NEGATIVE_REGULATION_OF_CELL_ADHESION_MEDIATED_BY_INTEGRIN	GOBP_NEGATIVE_REGULATION_OF_CELL_ADHESION_MEDIATED_BY_INTEGRIN	12	0.762118	1.91107	0.00467218	0.0455955	0.0381664	2901	tags=17%, list=5%, signal=16%	HRG/PDE3B
GOBP_NUCLEOTIDE_PHOSPHORYLATION	GOBP_NUCLEOTIDE_PHOSPHORYLATION	131	0.352891	1.3864	0.0047238	0.0459847	0.0384922	14503	tags=46%, list=26%, signal=34%	SLC4A1/ALDOB/OGDHL/AK5/PFKFB2/PPARGC1A/PKLR/FBP1/ESRRB/ENTPD5/GPD1/SLC4A4/BPGM/PFKM/ENO3/PRKAA2/OGDH/PGAM4/DHTKD1/PRKAG2/RANBP2/NME5/SEH1L/PSEN1/NUP35/IGF1/PGAM1/PPARA/AK7/PGK1/APP/HIF1A/PRKAG1/CMPK1/PRKAA1/NUP58/NUP160/NUP98/PRXL2C/NUP153/AK4/ALDOA/ZBTB20/NME6/HKDC1/AK9/MLXIPL/PFKFB1/CMPK2/AK8/HK2/JMJD8/GPI/NUP88/NUP133/LDHA/NUP50/NUP205/NUP37/NUP54
GOBP_FATTY_ACID_BETA_OXIDATION_USING_ACYL_COA_DEHYDROGENASE	GOBP_FATTY_ACID_BETA_OXIDATION_USING_ACYL_COA_DEHYDROGENASE	11	0.779501	1.92976	0.00473007	0.0459847	0.0384922	11133	tags=82%, list=20%, signal=66%	ACADM/ETFDH/ETFA/ACADL/IVD/ACAD11/ACADS/GCDH/ETFB
GOBP_PYRIDINE_CONTAINING_COMPOUND_METABOLIC_PROCESS	GOBP_PYRIDINE_CONTAINING_COMPOUND_METABOLIC_PROCESS	41	0.533302	1.7082	0.0047331	0.0459847	0.0384922	11323	tags=46%, list=20%, signal=37%	NMRK2/SLC22A13/SLC5A8/NUDT12/QPRT/ACMSD/NAXE/IDH2/PNP/PNPO/AOX1/NMNAT2/KYNU/ASPDH/NMNAT3/NMNAT1/RNLS/PDXP/NADK2
GOBP_PHENOL_CONTAINING_COMPOUND_BIOSYNTHETIC_PROCESS	GOBP_PHENOL_CONTAINING_COMPOUND_BIOSYNTHETIC_PROCESS	43	0.498578	1.65573	0.00476033	0.0461809	0.0386564	4711	tags=28%, list=8%, signal=26%	PMEL/TYR/PAH/INSM1/TYRP1/PNMT/DAO/SLC45A2/DDC/TH/DDT/HAND2
GOCC_PROTON_TRANSPORTING_ATP_SYNTHASE_COMPLEX	GOCC_PROTON_TRANSPORTING_ATP_SYNTHASE_COMPLEX	23	0.605405	1.7304	0.00477731	0.0462771	0.038737	10038	tags=65%, list=18%, signal=54%	ATP5F1A/ATP5MC3/ATP5MG/ATP5F1B/ATP5ME/PPIF/ATP5PF/ATP5PB/ATP5MPL/DMAC2L/ATP5MC1/ATP5PO/ATP5MD/ATP5F1C/ATP5PD
GOBP_POSITIVE_REGULATION_OF_CATION_CHANNEL_ACTIVITY	GOBP_POSITIVE_REGULATION_OF_CATION_CHANNEL_ACTIVITY	70	0.41478	1.48548	0.00480297	0.0464571	0.0388876	6411	tags=24%, list=11%, signal=22%	LRRC52/LRRC38/KCNA1/PLCG2/KCNJ11/HAP1/STAC2/TRDN/ANK3/ARC/AMIGO1/CCL2/NIPSNAP2/ANK2/KCNC2/FGF14/GAL
GOMF_PROTEIN_MACROMOLECULE_ADAPTOR_ACTIVITY	GOMF_PROTEIN_MACROMOLECULE_ADAPTOR_ACTIVITY	262	0.286788	1.22283	0.00482082	0.0465383	0.0389556	13176	tags=35%, list=23%, signal=27%	STAP1/SLC4A1/SPSB4/MPP7/FLRT1/FLRT3/GRB14/TRDN/AP1M2/ANK3/GAS2/HOMER1/PDZK1/PEX3/ANK2/AMFR/HSPA8/G3BP2/VPS18/MAPK8IP1/VAMP8/SOCS2/EPS8/SKP1/INSC/STX3/SAV1/VTI1B/BLNK/SERINC1/CDC42SE2/ROPN1B/AP1G1/FBXO7/HERPUD1/BAIAP2/CRADD/MAPT/HOMER2/CNKSR1/NAPG/AKAP6/DDB1/NAPA/GAS6/SLC9A3R1/PPP4R2/MAGI2/SH3RF1/CRK/ARRDC4/ST13/SPTBN4/ERG28/SDCBP/GAS2L3/STUB1/STX7/EPB41L3/SPAG9/PSMC6/AP2B1/STX5/STX19/FRS2/COL19A1…
GOBP_GOLGI_TO_PLASMA_MEMBRANE_TRANSPORT	GOBP_GOLGI_TO_PLASMA_MEMBRANE_TRANSPORT	58	0.452528	1.5745	0.00482556	0.0465383	0.0389556	14311	tags=53%, list=25%, signal=40%	STXBP6/ANK3/STEAP2/LYPLA1/AMN/ACSL3/EXOC1L/EXOC5/ARFGEF2/GOLGA4/EXOC8/RAB10/GOLPH3/PREPL/GOLGA7/ARL3/EXOC6/COMMD1/SPTBN1/SYS1/NSF/EXOC2/BLZF1/RABEP1/GGA2/VPS35L/GOLPH3L/SEC16A/BBS2/EXOC6B/VAMP3
GOMF_MAGNESIUM_ION_TRANSMEMBRANE_TRANSPORTER_ACTIVITY	GOMF_MAGNESIUM_ION_TRANSMEMBRANE_TRANSPORTER_ACTIVITY	16	0.69544	1.84652	0.00484663	0.0466728	0.0390682	14454	tags=69%, list=25%, signal=51%	NIPAL1/CLDN16/MMGT1/NIPA2/MRS2/MAGT1/ZDHHC13/CNNM2/NIPAL4/NIPA1/TUSC3
GOCC_VESICLE_TETHERING_COMPLEX	GOCC_VESICLE_TETHERING_COMPLEX	73	0.415532	1.53058	0.00486015	0.0467344	0.0391197	15277	tags=52%, list=27%, signal=38%	MYRIP/STXBP6/EXOC1L/VPS18/EXOC5/TRAPPC8/DNAJC28/HOOK1/TRAPPC13/TRAPPC6A/EXOC8/RAB10/AKTIP/TRAPPC2B/TRAPPC4/EXOC6/TRAPPC6B/ZW10/COG2/VPS54/EXOC2/EIPR1/CDC42/COG8/STX17/COG6/TMEM115/TRAPPC11/SEPTIN2/COG5/EXOC6B/VPS41/TRAPPC10/TRAPPC3/TRAPPC9/TRAPPC2L/VPS51/NBAS
GOBP_CELLULAR_SODIUM_ION_HOMEOSTASIS	GOBP_CELLULAR_SODIUM_ION_HOMEOSTASIS	19	0.653709	1.8195	0.00487051	0.0467654	0.0391457	5998	tags=37%, list=11%, signal=33%	UMOD/ATP4B/ATP12A/ATP4A/NEDD4L/ATP1A1/SLC12A2
GOMF_TRANSCRIPTION_REGULATOR_INHIBITOR_ACTIVITY	GOMF_TRANSCRIPTION_REGULATOR_INHIBITOR_ACTIVITY	18	0.678346	1.85402	0.00488792	0.046864	0.0392282	197	tags=11%, list=0%, signal=11%	NR0B2/PASD1
GOBP_REGULATION_OF_ERBB_SIGNALING_PATHWAY	GOBP_REGULATION_OF_ERBB_SIGNALING_PATHWAY	94	0.38739	1.44238	0.00493044	0.0472026	0.0395117	9421	tags=23%, list=17%, signal=20%	SH3GL2/AGR2/NEURL1/EGF/EREG/HAP1/BTC/PTPN3/LGMN/MIR29A/CEACAM1/RTN4/SOCS4/DUSP3/ERBB2/TSG101/PTPRJ/STAM2/AGT/GPER1/PSEN1/STAM
GOMF_ALDEHYDE_DEHYDROGENASE_NAD_P_PLUS_ACTIVITY	GOMF_ALDEHYDE_DEHYDROGENASE_NAD_P_PLUS_ACTIVITY	16	0.694054	1.84284	0.0049426	0.0472501	0.0395514	11230	tags=75%, list=20%, signal=60%	ADH4/ALDH1B1/ALDH1A2/ALDH1L1/ALDH4A1/ADH5/ALDH9A1/ALDH7A1/ALDH3A2/ALDH1A1/ALDH2/ALDH1A3
GOBP_UNSATURATED_FATTY_ACID_BIOSYNTHETIC_PROCESS	GOBP_UNSATURATED_FATTY_ACID_BIOSYNTHETIC_PROCESS	51	0.483153	1.62476	0.00496604	0.0474021	0.0396786	5907	tags=20%, list=10%, signal=18%	PLA2G4F/PLA2G3/AVPR1A/ELOVL4/SCD5/PTGDS/PNPLA8/ELOVL7/CBR1/FADS2B
GOMF_ALCOHOL_DEHYDROGENASE_NADPPLUS_ACTIVITY	GOMF_ALCOHOL_DEHYDROGENASE_NADPPLUS_ACTIVITY	21	0.626775	1.77584	0.00497295	0.0474021	0.0396786	8452	tags=48%, list=15%, signal=41%	ADH4/AKR1C4/RDH12/AKR1D1/AKR1C1/RDH11/RDH14/AKR1B1/RDH10/AKR7A2
GOBP_RESPONSE_TO_ESTRADIOL	GOBP_RESPONSE_TO_ESTRADIOL	125	0.345769	1.34401	0.00499827	0.0475743	0.0398228	4172	tags=13%, list=7%, signal=12%	CYP1A2/BMP7/SLC34A1/TACR3/F7/KCNJ11/PPARGC1A/SLC6A4/CRHBP/SFRP1/ALDH1A2/TH/CSN1S1/IHH/CAT/HPGD
GOCC_U5_SNRNP	GOCC_U5_SNRNP	22	0.622067	1.77046	0.00501292	0.0476445	0.0398816	14423	tags=50%, list=25%, signal=37%	RNU5A-1/RNU5B-1/SNRPD3/PRPF18/TXNL4A/SNRPN/SNRPD1/SNRPG/SNRNP40/CD2BP2/AAR2
GOBP_OLIGOSACCHARIDE_LIPID_INTERMEDIATE_BIOSYNTHETIC_PROCESS	GOBP_OLIGOSACCHARIDE_LIPID_INTERMEDIATE_BIOSYNTHETIC_PROCESS	21	0.625195	1.77136	0.00502852	0.0477236	0.0399478	16786	tags=76%, list=30%, signal=54%	ALG2/DOLK/ALG14/MPDU1/NUS1/ALG11/DOLPP1/ALG8/DHDDS/ALG1/ALG10/RFT1/ALG12/DPAGT1/ALG6/ALG9
GOBP_MEMBRANE_LIPID_BIOSYNTHETIC_PROCESS	GOBP_MEMBRANE_LIPID_BIOSYNTHETIC_PROCESS	146	0.34413	1.36979	0.00504673	0.0478272	0.0400345	10997	tags=38%, list=19%, signal=31%	CWH43/FA2H/GAL3ST3/ST8SIA5/CERKL/UGT8/ELOVL4/ST3GAL4/B4GALT6/ABCA8/HACD3/ASAH1/SGPP1/SGMS2/ELOVL7/ENPP7/DEGS2/SPTLC3/SMPD1/PIGH/SPTSSA/PGAP4/PLPP3/PIGW/ST8SIA6/SGMS1/PRKCD/CERS4/PIGO/VAPA/HACD2/SPTLC2/B4GALNT1/KDSR/ALOXE3/CLN8/ST3GAL1/PPM1L/PLPP1/B3GALT1/PIGA/PIGK/SPTLC1/ALDH3A2/SCCPDH/CERT1/PIGX/ORMDL2/SGPP2/MPPE1/CERS6/PIGF/PIGS/DPM1/PRKAA1/PRKD1
GOBP_REGULATION_OF_CELLULAR_PROTEIN_CATABOLIC_PROCESS	GOBP_REGULATION_OF_CELLULAR_PROTEIN_CATABOLIC_PROCESS	251	0.299352	1.27412	0.00508137	0.048086	0.0402511	15451	tags=48%, list=27%, signal=35%	F13B/TRIM67/EGF/PCSK9/F8A2/LRP2/RNF180/SVIP/RGN/LDLR/HSP90AA1/EZR/RDX/FBXL5/SOCS4/RNF14/EPHA4/MTM1/GABARAPL2/RCHY1/PINK1/BAG5/SHH/HERPUD1/PSME3/SH3RF2/UBQLN1/UBB/RAD23B/ANKIB1/MFSD8/MAGEF1/ZYG11B/TMTC3/TRIB1/LAPTM4B/NFE2L2/FAM122A/ALAD/PSEN1/SUMO1/AQP11/USP14/MARCHF7/HECTD1/PSMD14/RGP1/RNF185/UFL1/CLU/USP7/TAF9/SDCBP/COMMD1/UBE2K/VPS35/PSMD10/UQCC2/GSK3B/STUB1/HIPK2/NUDT15/CDC20B/UCHL5/ZER1/MAPK9…
GOMF_ALCOHOL_DEHYDROGENASE_NAD_P_PLUS_ACTIVITY	GOMF_ALCOHOL_DEHYDROGENASE_NAD_P_PLUS_ACTIVITY	10	0.813638	1.95189	0.00516443	0.0488016	0.0408501	2495	tags=40%, list=4%, signal=38%	ADH4/ADH1A/ADH1C/ADH6
GOBP_PROTEIN_MONOUBIQUITINATION	GOBP_PROTEIN_MONOUBIQUITINATION	66	0.435674	1.55897	0.00519213	0.0489928	0.0410102	16081	tags=58%, list=28%, signal=41%	NEURL1/FBXL2/SKP1/CUL3/PCGF5/CTR9/TSG101/TOPORS/BMI1/UBE2D3/UBB/UBE2W/DDB1/UBE2B/PEX12/MARCHF7/RAG1/TRIM37/RNF2/RYBP/WDR48/CDC73/KLHL22/RNF20/KLHL12/BCOR/BIRC2/UBE2E1/PEF1/WAC/RNF40/PCGF6/DTX3L/KBTBD8/UBE2R2/TRIM21/RBX1/OBI1
GOBP_AROMATIC_AMINO_ACID_FAMILY_CATABOLIC_PROCESS	GOBP_AROMATIC_AMINO_ACID_FAMILY_CATABOLIC_PROCESS	20	0.642551	1.82333	0.00521914	0.0491769	0.0411643	6691	tags=40%, list=12%, signal=35%	TAT/PAH/ACMSD/QDPR/ASRGL1/HGD/GSTZ1/PCBD1
GOMF_STRUCTURAL_CONSTITUENT_OF_RIBOSOME	GOMF_STRUCTURAL_CONSTITUENT_OF_RIBOSOME	165	0.324874	1.29503	0.00522806	0.0491903	0.0411754	35939	tags=99%, list=63%, signal=36%	RNA5S9/MRPL34/MRPS35/MRPS36/MRPL19/MRPL15/MRPL49/MRPL35/MRPS30/MRPL13/MRPS16/MRPS22/MRPL3/MRPL1/MRPS18A/MRPL47/MRPL54/MRPS18B/MRPS9/MRPL30/MRPS33/MRPL42/RPS3A/SRBD1/MRPL41/RSL24D1/MRPL4/MRPL16/MRPL32/MRPL21/MRPS23/MRPS14/MRPS31/MRPS7/MRPL22/RPL36AL/MRPL14/MRPS25/MRPS18C/RPS29/RPL15/MRPL11/MRPL12/MRPS2/MRPS5/RPL21/MRPL33/MRPL27/MRPL43/MRPS12/MRPS17/MRPL36/RPL7L1/MRPL28/MRPL57/MRPL52/MRPL20/RPS10P5…
GOCC_NUCLEOID	GOCC_NUCLEOID	44	0.505236	1.67741	0.00528641	0.049668	0.0415754	14140	tags=61%, list=25%, signal=46%	CPS1/SLC25A5/ATP5F1B/FASTKD5/DDX28/TRMT10C/HADHB/HSPA9/TFAM/GRSF1/VDAC1/LRPPRC/HADHA/TFB2M/FASTKD2/DBT/CLPX/VDAC2/UQCC2/POLDIP2/TUFM/LRRC59/TWNK/MTERF1/HSD17B10/TEFM/TFB1M
GOBP_REGULATION_OF_PROTEIN_POLYMERIZATION	GOBP_REGULATION_OF_PROTEIN_POLYMERIZATION	223	0.305644	1.27952	0.00532838	0.0499907	0.0418455	12174	tags=31%, list=21%, signal=24%	INPP5J/CTNNA2/CAPZA3/PFN3/SCIN/VIL1/SPTBN2/TUBB4A/CSF3/TPPP2/OCLN/SLIT2/PFN2/NPHS1/DNAI3/IQGAP2/GMFB/CYFIP2/PRKCE/TWF1/HSP90AA1/TMSB15A/RDX/CAPZA2/MKKS/EPS8/AP1AR/FMN1/ARHGAP40/PRKCD/WASL/TPPP/NCKAP1/PINK1/BIN1/ADD3/BAIAP2/ARHGAP18/MAPT/DMTN/JMY/PPP1R9A/ARFIP1/CAMSAP3/SLAIN2/ARF6/CARMIL1/VDAC2/SPTBN4/MAPRE1/TMSB4Y/ARFGEF1/MYADM/WASF3/SPTBN1/GBA2/SNCA/DLG1/SPIRE1/MAP2/TOGARAM1/SNX9/TMOD1/ACTR2/BAG…
GOBP_REGULATION_OF_STEROID_BIOSYNTHETIC_PROCESS	GOBP_REGULATION_OF_STEROID_BIOSYNTHETIC_PROCESS	91	0.404086	1.48137	0.00535629	0.0501719	0.0419971	8581	tags=26%, list=15%, signal=22%	CGA/CYP7A1/MIR33A/CES1/PPARGC1A/SC5D/FGF19/ASAH1/ATP1A1/TM7SF2/IDI1/FSHB/FGF1/DHCR7/CYP51A1/INSIG1/HMGCS1/HMGCR/LEP/BMP2/LPCAT3/GPAM/BMP5/FDFT1
GOBP_NAD_BIOSYNTHETIC_PROCESS	GOBP_NAD_BIOSYNTHETIC_PROCESS	29	0.56842	1.71208	0.00536299	0.0501719	0.0419971	10558	tags=45%, list=19%, signal=37%	NMRK2/SLC22A13/SLC5A8/NUDT12/QPRT/ACMSD/NAXE/NMNAT2/KYNU/ASPDH/NMNAT3/NMNAT1/RNLS
GOMF_S_ADENOSYLMETHIONINE_DEPENDENT_METHYLTRANSFERASE_ACTIVITY	GOMF_S_ADENOSYLMETHIONINE_DEPENDENT_METHYLTRANSFERASE_ACTIVITY	157	0.339239	1.33511	0.00539017	0.0503543	0.0421498	16069	tags=48%, list=28%, signal=34%	METTL21C/PRMT8/GNMT/PNMT/PRDM16/SETMAR/COQ3/TRMT10C/ARMT1/SETD3/TPMT/PRMT6/CARNMT1/CMTR2/SETD9/ATPSCKMT/TRMT61B/TFB2M/THUMPD3/EEF2KMT/SUZ12/PCMT1/TRMO/HNMT/METTL14/PRMT3/TRMT1L/MECOM/METTL15/TRMT6/SMYD2/BMT2/TRMT2B/PRMT9/TRMT5/SETDB2/COMTD1/KMT5B/RBBP5/PRMT5/EEF1AKMT2/METTL2A/MEPCE/FDXACB1/ANTKMT/SETD7/COQ5/SUV39H2/ICMT/METTL5/FBXO11/TRMT10A/METTL4/METTL21A/LCMT1/MRM3/TFB1M/METTL8/METTL15P1/METTL…
GOCC_COMPACT_MYELIN	GOCC_COMPACT_MYELIN	11	0.771488	1.90993	0.00547041	0.0510312	0.0427165	8828	tags=64%, list=16%, signal=54%	MAG/MARVELD2/PLLP/MBP/MPP5/AKR1B1/PRKCI
GOMF_THIOLESTER_HYDROLASE_ACTIVITY	GOMF_THIOLESTER_HYDROLASE_ACTIVITY	40	0.521783	1.65751	0.00547933	0.0510418	0.0427254	8394	tags=42%, list=15%, signal=36%	BAAT/ACOT12/ACOT1/ACOT11/HIBCH/ACAA2/ACOT4/ABHD17C/LYPLA1/ABHD10/ACOT2/OLAH/LYPLAL1/ABHD17B/ABHD13/NUDT7/HAGH
GOBP_REGULATION_OF_EXOCYTOSIS	GOBP_REGULATION_OF_EXOCYTOSIS	194	0.304756	1.26595	0.00549231	0.0510901	0.0427658	11034	tags=29%, list=19%, signal=24%	CFTR/SYT10/LGI3/PLA2G3/STXBP5L/CD177/RIMS1/SYT9/SYT17/TRPV6/HAP1/SYT8/STXBP6/CLTRN/VSNL1/EXPH5/SYT3/SYT7/F2RL1/CEACAM1/SDC4/VPS18/SDC1/RAB9A/VAMP8/SNX4/CADPS2/STXBP1/SCAMP5/ADCY1/TSG101/CADPS/RIMS4/AP1G1/PDCD6IP/CACNB2/PCLO/RAB21/RAB10/PREPL/STAM/RIMS2/CBARP/STXBP3/RAPGEF4/VPS4B/RAB5A/LAMP1/PDPK1/GATA2/SDCBP/RAB7A/GSK3B/REST/CLASP2/SNCA/NSF
GOBP_FATTY_ACID_DERIVATIVE_BIOSYNTHETIC_PROCESS	GOBP_FATTY_ACID_DERIVATIVE_BIOSYNTHETIC_PROCESS	62	0.441919	1.54787	0.00553075	0.0513749	0.0430041	8124	tags=34%, list=14%, signal=29%	GGT6/HMGCS2/ACAT1/BDH1/ELOVL4/ACSS3/ACSL1/SCD5/ACSL6/HPGD/SLC27A5/ACSBG1/ELOVL7/HSD17B12/HSD17B8/ACSL3/BDH2/GGTLC1/CBR4/HACD2/ACSL4
GOBP_REGULATION_OF_EXCITATORY_SYNAPSE_ASSEMBLY	GOBP_REGULATION_OF_EXCITATORY_SYNAPSE_ASSEMBLY	13	0.736794	1.86949	0.0055551	0.0515281	0.0431324	1130	tags=15%, list=2%, signal=15%	LRRTM1/GRID2
GOCC_LATERAL_PLASMA_MEMBRANE	GOCC_LATERAL_PLASMA_MEMBRANE	62	0.440429	1.54265	0.0056304	0.0520792	0.0435937	14047	tags=50%, list=25%, signal=38%	ATP6V1B1/OCLN/MPP7/TACSTD2/EPCAM/CLDN4/DSG2/ANK3/CDH1/ATP1A1/CLDN7/CEACAM1/SLC12A2/CLDN3/FGF13/SCN5A/ABCC6/CLDN12/DLG1/SNTA1/CTNNB1/FZD3/APC/NSG1/GJB2/GPSM2/VANGL1/ATP1B1/CORO1C/CLDN1/ANXA1
GOCC_MAIN_AXON	GOCC_MAIN_AXON	62	0.441009	1.54468	0.0056304	0.0520792	0.0435937	5345	tags=24%, list=9%, signal=22%	CRH/KCNA1/CCK/MAG/KCNJ11/TUBB4A/CRHBP/CNTNAP2/DLG2/ANK3/SCN2A/KIF13B/UCN3/KCNA2/MBP
GOBP_NEGATIVE_REGULATION_OF_ERBB_SIGNALING_PATHWAY	GOBP_NEGATIVE_REGULATION_OF_ERBB_SIGNALING_PATHWAY	52	0.458481	1.55217	0.00566517	0.052327	0.0438011	12612	tags=40%, list=22%, signal=31%	SH3GL2/EGF/EREG/BTC/PTPN3/LGMN/SOCS4/DUSP3/ERBB2/TSG101/PTPRJ/STAM2/PSEN1/STAM/SPRY2/RAB7A/SNX6/SNX5/CDC42/VPS25/TGFA
GOBP_SYNAPTIC_TRANSMISSION_DOPAMINERGIC	GOBP_SYNAPTIC_TRANSMISSION_DOPAMINERGIC	24	0.603345	1.71304	0.00569351	0.0525148	0.0439583	3223	tags=21%, list=6%, signal=20%	CRH/SLC6A2/SLC6A4/CRHBP/TH
GOCC_LARGE_RIBOSOMAL_SUBUNIT	GOCC_LARGE_RIBOSOMAL_SUBUNIT	115	0.36612	1.38701	0.00570187	0.0525181	0.0439611	29912	tags=97%, list=53%, signal=46%	MRPL53/MRPL34/MRPL50/NDUFAB1/MRPL44/MRPL19/MRPL15/MRPL49/MRPL35/MRPS30/MRPL13/MRPL3/MRPL1/MRPS18A/MRPL47/MRPL54/MRPL48/MRPL30/MPV17L2/MRPL42/MRPL45/MRPL41/MRPL39/MALSU1/RSL24D1/MRPL4/MRPL16/MRPL32/MRPL21/MRPL22/RPL36AL/MRPL14/RPL15/MRPL11/MRPL12/MRPL58/RPL21/MRPL33/MRPL27/MRPL43/MRPL36/RPL7L1/MRPL28/MRPL57/MRPL52/MRPL20/MRPL37/RPL26L1/RPL22/FXR2/RPL34/RPL26/NSUN4/RPL39P5/MRPL10/RPL9/RBM3/MRPL51/M…
GOBP_DETOXIFICATION	GOBP_DETOXIFICATION	135	0.339193	1.32473	0.00573517	0.0527507	0.0441558	12546	tags=44%, list=22%, signal=35%	ADH4/ALB/BMP7/FABP1/RDH12/IYD/DUOX2/NNT/APOM/AKR7A3/CAT/RDH11/HP/GSTA1/SLC15A2/PDZK1/PRDX2/GSTO2/PRDX3/SELENOT/GSTZ1/TXNDC2/FANCC/HBG1/MTARC2/ABCG2/ADH5/SLC17A3/GPX3/MGST2/GSTO1/SLC30A1/CD36/PRDX5/GSTP1/GSTM3/NFE2L2/ATP7A/SLC30A10/HBB/IPCEF1/DHFRP1/GSR/TXNRD3/MGST3/SELENOS/GCH1/TXNRD2/TXN/DHFR/UBIAD1/SESN1/ESD/OSCP1/RALBP1/SRXN1/PRXL2C/SOD1/HBA2/SLC22A5
GOMF_GLUCURONOSYLTRANSFERASE_ACTIVITY	GOMF_GLUCURONOSYLTRANSFERASE_ACTIVITY	33	0.558095	1.70741	0.00574571	0.0527736	0.0441749	7422	tags=30%, list=13%, signal=26%	UGT2B15/UGT2B4/UGT1A4/UGT2B28/UGT1A9/LARGE2/UGT3A1/UGT1A7/UGT2A1/UGT2A3
GOBP_RIBOSOMAL_SMALL_SUBUNIT_BIOGENESIS	GOBP_RIBOSOMAL_SMALL_SUBUNIT_BIOGENESIS	75	0.404625	1.47516	0.00577051	0.052885	0.0442682	33881	tags=100%, list=60%, signal=40%	SRFBP1/UTP4/UTP3/UTP20/RRS1/RIOK3/DDX52/XRCC5/NOL11/RRP36/DCAF13/MRPS7/ERCC2/BYSL/NOP9/LSM6/GTF2H5/RIOK1/RPP40/RPS10P5/RIOK2/TSR2/SNU13/WDR3/NPM1/UTP23/ERAL1/NOL10/NGDN/TSR3/LTV1/MRPS11/SURF6/EMG1/NOP14/PRKDC/RPS27L/TBL3/RPS6/ABT1/RPS28/RCL1/RPSA/TSR1/FP565260.1/NOB1/RRP7A/RPS5/NAT10/NOM1/RPS21/WDR46/RPS14/BMS1/UTP25/FAM207A/RPS7/RPS16/HEATR1/UTP6/RPS25/RPS27/RPL38/METTL17/PWP2/DHX37/RPS24/RPS8/H…
GOBP_FATTY_ACID_TRANSPORT	GOBP_FATTY_ACID_TRANSPORT	150	0.336057	1.32983	0.00577396	0.052885	0.0442682	9056	tags=33%, list=16%, signal=28%	PLA2G4F/PLA2G3/THRSP/RIMS1/SLC22A9/CCK/FABP1/CYP4A11/SLC1A6/AVPR1A/GRM1/SLC5A8/CYP4F2/SLC27A2/ACSL1/SLC27A5/SPX/KCNJ10/PNPLA8/SLC1A1/SLC17A7/ABCD3/GOT2/SLC1A2/FABP3/PPARG/ACSL3/SLC27A4/CPT1A/PRKAA2/CPT2/PLIN2/STXBP1/AVPR1B/PLA2G12A/AGTR2/PRKAG2/SLC25A13/SLC25A20/UNC13B/CROT/ACSL4/PLA2G4A/CLN8/SLC25A12/PLA2G12B/CD36/GLS/FIS1/FABP4
GOBP_NEGATIVE_REGULATION_OF_RESPONSE_TO_ENDOPLASMIC_RETICULUM_STRESS	GOBP_NEGATIVE_REGULATION_OF_RESPONSE_TO_ENDOPLASMIC_RETICULUM_STRESS	44	0.50233	1.66777	0.00580395	0.0530855	0.0444361	13318	tags=48%, list=23%, signal=37%	PDX1/DNAJB9/SVIP/PPP1R15B/HERPUD1/OPA1/LPCAT3/DNAJC3/CREB3/TMBIM6/XBP1/AQP11/USP14/HSPA5/WFS1/UFL1/CLU/SELENOS/LRRK2/USP25/DDRGK1
GOBP_REGULATION_OF_LAMELLIPODIUM_ASSEMBLY	GOBP_REGULATION_OF_LAMELLIPODIUM_ASSEMBLY	40	0.518151	1.64598	0.00590908	0.0538967	0.0451151	2392	tags=10%, list=4%, signal=10%	HRG/FRMD7/OCLN/SLIT2
GOBP_VIRION_ASSEMBLY	GOBP_VIRION_ASSEMBLY	40	0.517946	1.64533	0.00590908	0.0538967	0.0451151	16921	tags=72%, list=30%, signal=51%	PC/CHMP2B/CHMP5/SPCS1/TSG101/PDCD6IP/UBB/RAB1A/VPS37D/VTA1/VPS37B/CHMP1B/VPS4B/CHMP3/CHMP4C/RAB1B/USP6NL/CHMP6/VPS37A/RAB43/DDX6/VPS37C/APOE/PPIA/VPS4A/RPS27A/MVB12B/CHMP7/CHMP1A
GOBP_PROTEIN_DEMANNOSYLATION	GOBP_PROTEIN_DEMANNOSYLATION	20	0.637674	1.80949	0.00593874	0.054092	0.0452786	15496	tags=75%, list=27%, signal=55%	MAN1C1/MAN1A1/AMFR/RNF103/RNF185/MAN1A2/TRIM13/SEL1L/RNF5/RNF139/EDEM3/UGGT1/DERL2/UGGT2/MARCHF6
GOBP_REGULATION_OF_EARLY_ENDOSOME_TO_LATE_ENDOSOME_TRANSPORT	GOBP_REGULATION_OF_EARLY_ENDOSOME_TO_LATE_ENDOSOME_TRANSPORT	18	0.672372	1.8377	0.00595559	0.0541703	0.0453441	13072	tags=67%, list=23%, signal=51%	EZR/RDX/DENND10/RAB21/SNX3/MAPK1/CHMP3/SNX12/DAB2/MAP2K1/DNAJC13/MTMR2
GOBP_CHROMATIN_REMODELING_AT_CENTROMERE	GOBP_CHROMATIN_REMODELING_AT_CENTROMERE	47	0.467338	1.54846	0.00598813	0.0543908	0.0455287	2922	tags=13%, list=5%, signal=12%	H4C6/H4C4/H4C2/H4C1/H4C13/H4C3
GOBP_ACYLGLYCEROL_HOMEOSTASIS	GOBP_ACYLGLYCEROL_HOMEOSTASIS	39	0.503545	1.58814	0.00607563	0.0551093	0.0461301	5600	tags=26%, list=10%, signal=23%	APOA5/APOC3/APOA1/MIR33A/MIR208A/DGAT2/ANGPTL3/PNPLA8/ABCG8/FITM2
GOBP_NEGATIVE_REGULATION_OF_FATTY_ACID_BIOSYNTHETIC_PROCESS	GOBP_NEGATIVE_REGULATION_OF_FATTY_ACID_BIOSYNTHETIC_PROCESS	20	0.636294	1.80558	0.00616074	0.0557368	0.0466553	6527	tags=30%, list=11%, signal=27%	APOC3/CYP7A1/MIR33A/CEACAM1/INSIG1/ACADL
GOCC_PROTEASOME_ACCESSORY_COMPLEX	GOCC_PROTEASOME_ACCESSORY_COMPLEX	24	0.601572	1.70801	0.00616181	0.0557368	0.0466553	16882	tags=71%, list=30%, signal=50%	PSME3/PSMD14/PSMD10/PSMD6/PSMC6/PSMD12/PSMD1/PSMD7/PSMC2/PSME1/PSMD5/PSMD11/PSMD2/PSMC4/PSMC1/PSMD8/PSMC3
GOMF_C_ACYLTRANSFERASE_ACTIVITY	GOMF_C_ACYLTRANSFERASE_ACTIVITY	20	0.635136	1.80229	0.00627174	0.056653	0.0474223	10606	tags=75%, list=19%, signal=61%	ACAT1/ACAA2/ACSM2B/SPTLC3/HADHB/SPTSSA/SCP2/ACSM2A/HADHA/SPTLC2/SPTLC1/GCAT/ACAA1/ACSM3/ACSM5
GOBP_MITOCHONDRIAL_OUTER_MEMBRANE_PERMEABILIZATION	GOBP_MITOCHONDRIAL_OUTER_MEMBRANE_PERMEABILIZATION	55	0.455054	1.57401	0.0063087	0.0569085	0.0476361	14174	tags=53%, list=25%, signal=40%	SLC25A5/ACAA2/SLC35F6/CHCHD10/MUL1/PMAIP1/BOK/TMEM14A/FZD9/SFN/MOAP1/MPV17L/BCL2/VDAC2/BLOC1S2/MAPK8/BNIP3/GSK3B/YWHAB/TFDP2/TP73/YWHAE/YWHAQ/TFDP1/PPP1R13B/YWHAH/BAK1/TMEM102/TP53BP2
GOBP_VASCULAR_ENDOTHELIAL_GROWTH_FACTOR_SIGNALING_PATHWAY	GOBP_VASCULAR_ENDOTHELIAL_GROWTH_FACTOR_SIGNALING_PATHWAY	47	0.465631	1.54281	0.00631851	0.0569187	0.0476446	4182	tags=11%, list=7%, signal=10%	HRG/MIR329-1/IL12B/CCBE1/CADM4
GOMF_AMINO_ACID_BINDING	GOMF_AMINO_ACID_BINDING	54	0.455972	1.56305	0.00636422	0.0571537	0.0478414	7710	tags=33%, list=14%, signal=29%	TAT/OTC/AGXT/GPR143/CPS1/GNMT/CASR/DDC/TH/NOS2/SLC1A1/DDAH1/GOT2/GLUD1/GLUD2/GCLC/SESN3/GLDC
GOBP_RIBONUCLEOSIDE_TRIPHOSPHATE_METABOLIC_PROCESS	GOBP_RIBONUCLEOSIDE_TRIPHOSPHATE_METABOLIC_PROCESS	86	0.389841	1.4139	0.00636565	0.0571537	0.0478414	13369	tags=49%, list=24%, signal=37%	PPARGC1A/ATP6V1A/PKLR/MTCO2P12/ATP5F1A/ATP5MC3/ATP5MG/ATP5F1B/AK3/ATP5ME/ATP5PF/ATP5PB/DMAC2L/CTPS1/PRKAG2/SLC25A13/ATPSCKMT/PINK1/ATP5MC1/ATP5PO/LDHC/OPA1/SLC25A12/NME5/ATP5F1C/STOML2/DNAJC30/PPARA/ATP5PD/RHOQ/ATP5F1E/LRRK2/VCP/AK4/ALDOA/NME6/AK9/RAN/ANTKMT/MFN1/ATP5F1D/EFL1
GOBP_NEGATIVE_REGULATION_OF_DELAYED_RECTIFIER_POTASSIUM_CHANNEL_ACTIVITY	GOBP_NEGATIVE_REGULATION_OF_DELAYED_RECTIFIER_POTASSIUM_CHANNEL_ACTIVITY	11	0.764631	1.89295	0.00637528	0.0571537	0.0478414	3891	tags=36%, list=7%, signal=34%	KCNE5/MTNR1B/KCNE1B/ANK3
GOBP_VESICLE_MEDIATED_TRANSPORT_TO_THE_PLASMA_MEMBRANE	GOBP_VESICLE_MEDIATED_TRANSPORT_TO_THE_PLASMA_MEMBRANE	92	0.383682	1.42048	0.00637946	0.0571537	0.0478414	14311	tags=49%, list=25%, signal=37%	STXBP6/ANK3/STEAP2/ZDHHC2/SLC1A1/LYPLA1/AMN/ACSL3/EXOC1L/EXOC5/STX3/ARFGEF2/GOLGA4/VPS26A/RAB11A/EXOC8/RAB10/GOLPH3/PREPL/GOLGA7/ARL3/SNX31/EXOC6/COMMD1/VPS35/RAB7A/SPTBN1/SYS1/NSF/VPS26C/EXOC2/VPS29/BLZF1/RABEP1/NSG1/SNX17/GGA2/VPS35L/GRIP1/GOLPH3L/SEC16A/ANKRD27/BBS2/EXOC6B/VAMP3
GOBP_NEGATIVE_REGULATION_OF_PEPTIDE_SECRETION	GOBP_NEGATIVE_REGULATION_OF_PEPTIDE_SECRETION	71	0.404265	1.46984	0.00649405	0.058101	0.0486343	7670	tags=24%, list=13%, signal=21%	CRH/STXBP5L/MTNR1B/KCNJ11/ACVR1C/CRHBP/SFRP1/IL12B/VSNL1/ADTRP/CYP51A1/DPH3/RAB11FIP5/HMGCR/IDH2/LEP/FAM3D
GOBP_CYTOPLASM_ORGANIZATION	GOBP_CYTOPLASM_ORGANIZATION	11	0.762989	1.88888	0.0065398	0.0582285	0.0487411	751	tags=18%, list=1%, signal=18%	TFCP2L1/CAPZA3
GOBP_PROGESTERONE_METABOLIC_PROCESS	GOBP_PROGESTERONE_METABOLIC_PROCESS	15	0.72461	1.86991	0.00654003	0.0582285	0.0487411	3167	tags=27%, list=6%, signal=25%	CYP17A1/AKR1C4/PPARGC1A/AKR1C1
GOBP_INTESTINAL_LIPID_ABSORPTION	GOBP_INTESTINAL_LIPID_ABSORPTION	19	0.641752	1.78622	0.00654356	0.0582285	0.0487411	8692	tags=58%, list=15%, signal=49%	APOA5/APOA1/CEL/AKR1C1/ABCG8/ENPP7/LDLR/LIMA1/LEP/LPCAT3/CD36
GOBP_REGULATION_OF_NECROTIC_CELL_DEATH	GOBP_REGULATION_OF_NECROTIC_CELL_DEATH	37	0.502943	1.56567	0.00654383	0.0582285	0.0487411	4554	tags=19%, list=8%, signal=17%	MIR485/MIR103A1/MTCO2P12/SLC25A4/ASAH1/MIR221/SLC6A13
GOMF_VOLTAGE_GATED_POTASSIUM_CHANNEL_ACTIVITY	GOMF_VOLTAGE_GATED_POTASSIUM_CHANNEL_ACTIVITY	87	0.381925	1.3914	0.00660743	0.0587148	0.0491482	6907	tags=24%, list=12%, signal=21%	LRRC52/LRRC38/KCNE5/KCNG3/HCN2/KCNJ1/KCNA1/KCNJ11/KCNV1/KCNE1B/KCNH6/KCNH7/KCNJ10/KCNMA1/KCNA2/HCN4/KCNC2/KCNJ15/KCNQ4/KCNQ1/KCNB2
GOBP_GAS_TRANSPORT	GOBP_GAS_TRANSPORT	20	0.631716	1.79259	0.00671575	0.0595966	0.0498862	3593	tags=25%, list=6%, signal=23%	AQP6/AQP5/NGB/CA2/MB
GOBP_PEPTIDYL_ASPARAGINE_MODIFICATION	GOBP_PEPTIDYL_ASPARAGINE_MODIFICATION	31	0.552422	1.66924	0.00673998	0.0597308	0.0499986	15862	tags=71%, list=28%, signal=51%	B4GALNT2/STT3B/MAGT1/MGAT2/ALG5/DAD1/ST6GAL1/RPN1/DPM1/ASGR2/MCFD2/ALG8/OSTC/STT3A/NUDT14/LMAN1/TUSC3/UGGT1/UBE2J1/UGGT2/FUT8/RPN2
GOBP_NEPHRON_DEVELOPMENT	GOBP_NEPHRON_DEVELOPMENT	137	0.338342	1.31777	0.00684229	0.0604821	0.0506275	9775	tags=31%, list=17%, signal=25%	UMOD/CALB1/BMP7/NPHS2/GPC3/SOX8/WNT11/IRX1/TACSTD2/KLHL3/FOXJ1/SIX4/TFAP2B/NPHS1/COL4A4/NPNT/LGR4/LHX1/PBX1/SOX9/ANGPT1/FGF1/ADAMTS16/KLF15/MTSS1/FOXC1/SIX1/FMN1/AGTR2/BMP2/PROM1/PDGFD/SHH/SALL1/COL4A3/WNT9B/AGT/MAGI2/AQP11/CD24/BCL2/SMAD4
GOBP_REGULATION_OF_CELL_JUNCTION_ASSEMBLY	GOBP_REGULATION_OF_CELL_JUNCTION_ASSEMBLY	192	0.308156	1.2807	0.00685226	0.0604821	0.0506275	7202	tags=15%, list=13%, signal=13%	HRG/LRRTM1/NTN1/GRID2/LHFPL4/LRRN1/CLSTN2/OCLN/CLDN19/SFRP1/FLRT3/LRFN5/SIX4/ACE2/EPB41L5/AMIGO1/PTPRD/FZD5/GPC4/SDC4/ARHGAP6/CLDN3/CRB3/VSTM5/DUSP3/SIX1/FMN1/RAB17
GOBP_RESPONSE_TO_IMMOBILIZATION_STRESS	GOBP_RESPONSE_TO_IMMOBILIZATION_STRESS	25	0.608681	1.75716	0.00685243	0.0604821	0.0506275	6411	tags=36%, list=11%, signal=32%	CRH/CYP1A2/CYP1A1/GOT1/TH/REN/UCN3/PPARG/GAL
GOBP_POSITIVE_REGULATION_OF_STRESS_FIBER_ASSEMBLY	GOBP_POSITIVE_REGULATION_OF_STRESS_FIBER_ASSEMBLY	52	0.454066	1.53723	0.00687602	0.0606088	0.0507335	3232	tags=12%, list=6%, signal=11%	APOA1/PPM1E/WNT11/SFRP1/TAC1/PFN2
GOBP_REGULATION_OF_INSULIN_RECEPTOR_SIGNALING_PATHWAY	GOBP_REGULATION_OF_INSULIN_RECEPTOR_SIGNALING_PATHWAY	69	0.398748	1.44234	0.00690239	0.0606635	0.0507793	8723	tags=23%, list=15%, signal=20%	AHSG/TRIM72/MIR103A1/GRB14/VWA2/SORL1/ENPP1/SLC27A4/PIP4K2C/PRKCD/LEP/SESN3/SIK2/OSBPL8/OPA1/ENHO
GOBP_MITOCHONDRIAL_ELECTRON_TRANSPORT_UBIQUINOL_TO_CYTOCHROME_C	GOBP_MITOCHONDRIAL_ELECTRON_TRANSPORT_UBIQUINOL_TO_CYTOCHROME_C	14	0.707162	1.81722	0.00690998	0.0606635	0.0507793	11442	tags=79%, list=20%, signal=63%	CYCS/UQCRFS1/UQCRFS1P1/UQCRC1/UQCRQ/UQCRC2/CYC1/UQCR10/UQCR11/UQCRB/UQCRH
GOCC_SAM_COMPLEX	GOCC_SAM_COMPLEX	13	0.73042	1.85332	0.00690998	0.0606635	0.0507793	13912	tags=85%, list=24%, signal=64%	APOO/APOOL/HSPA9/IMMT/MTX2/CHCHD3/SAMM50/MICOS10/MICOS13/CHCHD6/DNAJC11
GOBP_POSITIVE_REGULATION_OF_POTASSIUM_ION_TRANSPORT	GOBP_POSITIVE_REGULATION_OF_POTASSIUM_ION_TRANSPORT	44	0.497786	1.65268	0.00698691	0.0612569	0.051276	6855	tags=23%, list=12%, signal=20%	LRRC52/LRRC38/KCNE5/KCNA1/WNK3/AMIGO1/ANK2/KCNC2/GAL/KCNQ1
GOBP_UREA_CYCLE	GOBP_UREA_CYCLE	11	0.760441	1.88258	0.00703336	0.0615818	0.051548	5255	tags=45%, list=9%, signal=41%	OTC/ARG1/CPS1/ARG2/SLC25A15
GOMF_COA_HYDROLASE_ACTIVITY	GOMF_COA_HYDROLASE_ACTIVITY	21	0.616879	1.7478	0.00709148	0.0619324	0.0518415	6065	tags=38%, list=11%, signal=34%	BAAT/ACOT12/ACOT1/ACOT11/HIBCH/ACAA2/ACOT4/ACOT2
GOBP_NEGATIVE_REGULATION_OF_CYTOSKELETON_ORGANIZATION	GOBP_NEGATIVE_REGULATION_OF_CYTOSKELETON_ORGANIZATION	155	0.332301	1.302	0.00709229	0.0619324	0.0518415	11197	tags=28%, list=20%, signal=22%	INPP5J/CTNNA2/FRMD7/CAPZA3/SCIN/VIL1/SPTBN2/TUBB4A/SLIT2/TACSTD2/PFN2/DNAI3/GMFB/TWF1/TMSB15A/RDX/ARHGAP6/CAPZA2/LIMA1/MKKS/IQCJ-SCHIP1/CGNL1/EPS8/PRKCD/FGF13/ADD3/DMTN/PPP1R9A/NUBP1/CAMSAP3/SMAD4/CARMIL1/SPTBN4/MAPRE1/PIK3CA/TMSB4Y/ARFGEF1/MYADM/SPTBN1/CLASP2/SNCA/MAP2/TRIM37
GOMF_GDP_BINDING	GOMF_GDP_BINDING	74	0.407099	1.50044	0.00717265	0.0625509	0.0523592	12896	tags=58%, list=23%, signal=45%	DIRAS1/RRAGD/PCK1/RRAS2/SUCLG2/RAB9A/RAB18/RAB17/RAB29/RASEF/ARL8B/KRAS/RHOB/SRP54/RAB14/DIRAS2/RAB21/RAB10/ARL3/ARF6/RHEB/MIEF1/RAB5A/DYNC1LI1/RALB/RAB7A/RAB2A/PRPS2/RAB5C/NRAS/RAB4A/TRIM23/RAB28/GBP1/RALA/RAP1A/RRAGC/GNAI1/RAP2A/MRAS/RIT1/RAB12/RAN
GOBP_POSITIVE_REGULATION_OF_FOCAL_ADHESION_ASSEMBLY	GOBP_POSITIVE_REGULATION_OF_FOCAL_ADHESION_ASSEMBLY	25	0.60679	1.7517	0.00719792	0.0626879	0.0524738	7874	tags=24%, list=14%, signal=21%	HRG/SFRP1/EPB41L5/SDC4/FMN1/PTPRJ
GOBP_ATP_SYNTHESIS_COUPLED_PROTON_TRANSPORT	GOBP_ATP_SYNTHESIS_COUPLED_PROTON_TRANSPORT	27	0.573181	1.67873	0.00721308	0.0627366	0.0525146	10038	tags=59%, list=18%, signal=49%	ATP6V1A/ATP5F1A/ATP5MC3/ATP5MG/ATP5F1B/ATP5ME/ATP5PF/ATP5PB/DMAC2L/ATPSCKMT/ATP5MC1/ATP5PO/ATP5F1C/STOML2/DNAJC30/ATP5PD
GOMF_ACYL_COA_DEHYDROGENASE_ACTIVITY	GOMF_ACYL_COA_DEHYDROGENASE_ACTIVITY	11	0.758331	1.87735	0.00728014	0.063236	0.0529327	11080	tags=82%, list=19%, signal=66%	ACADM/ACADSB/ACADL/IVD/ACAD11/ACAD8/ACADS/GCDH/ACAD10
GOMF_TRANSLATION_REPRESSOR_ACTIVITY	GOMF_TRANSLATION_REPRESSOR_ACTIVITY	25	0.605412	1.74772	0.00731308	0.0634381	0.0531018	11573	tags=60%, list=20%, signal=48%	TRIM71/PAIP2B/CPEB1/CPEB3/CPEB4/PURA/SHMT1/CPEB2/SAMD4A/EIF4EBP2/DHFRP1/PAIP2/DHFR/IREB2/FMR1
GOBP_RESPONSE_TO_FATTY_ACID	GOBP_RESPONSE_TO_FATTY_ACID	60	0.419316	1.46428	0.00734429	0.0636246	0.0532579	7710	tags=23%, list=14%, signal=20%	PON1/AKR1C4/CPS1/PDX1/PPARGC1A/AKR1C1/ACSL1/DGAT2/CAT/SOX9/FABP3/CPT1A/FOXO1/GLDC
GOBP_PROTON_TRANSPORTING_TWO_SECTOR_ATPASE_COMPLEX_ASSEMBLY	GOBP_PROTON_TRANSPORTING_TWO_SECTOR_ATPASE_COMPLEX_ASSEMBLY	14	0.704918	1.81145	0.00736161	0.0636905	0.0533131	13224	tags=57%, list=23%, signal=44%	ALDOB/ATPAF1/TMEM70/VMA21/TMEM199/PIP4P1/FMC1/ATP5F1D
GOBP_THYROID_HORMONE_TRANSPORT	GOBP_THYROID_HORMONE_TRANSPORT	10	0.802105	1.92422	0.00739542	0.063848	0.053445	4721	tags=50%, list=8%, signal=46%	SERPINA7/TTR/SLC7A8/CRYM/SLC16A10
GOCC_INTRINSIC_COMPONENT_OF_PEROXISOMAL_MEMBRANE	GOCC_INTRINSIC_COMPONENT_OF_PEROXISOMAL_MEMBRANE	15	0.719496	1.85671	0.00739929	0.063848	0.053445	12083	tags=80%, list=21%, signal=63%	SLC27A2/PEX3/PEX2/FIS1/PEX12/PEX11G/PEX13/FAR2/SLC25A17/FAR1/PEX11B/PEX26
GOMF_PHOSPHORIC_DIESTER_HYDROLASE_ACTIVITY	GOMF_PHOSPHORIC_DIESTER_HYDROLASE_ACTIVITY	88	0.38995	1.41647	0.00754605	0.0650289	0.0544334	9971	tags=30%, list=18%, signal=24%	CHRM1/PLCG2/CASR/PLCZ1/PDE3B/MPPED2/PLCXD3/PLCL1/PDE1C/PLCL2/ENPP7/ENPP1/SMPD1/CHRM3/GDE1/NOTUM/PLCH2/FICD/NAPEPLD/TDP2/SMPDL3A/PLCB4/PLCD4/PDE7B/MPPE1/ENPP6
GOBP_RESPONSE_TO_MISFOLDED_PROTEIN	GOBP_RESPONSE_TO_MISFOLDED_PROTEIN	24	0.592123	1.68118	0.00757019	0.0651513	0.0545359	15729	tags=62%, list=28%, signal=45%	F12/DNAJB14/CUL3/KLHL15/UBE2W/RNF185/CLU/RNF5/STUB1/TOR1A/SDF2L1/VCP/UGGT1/UGGT2/POMT2
GOBP_MATURATION_OF_SSU_RRNA	GOBP_MATURATION_OF_SSU_RRNA	50	0.46657	1.57251	0.00758289	0.0651528	0.0545371	30352	tags=100%, list=53%, signal=47%	SRFBP1/UTP4/UTP3/UTP20/RRS1/RIOK3/DDX52/NOL11/RRP36/DCAF13/ERCC2/BYSL/NOP9/LSM6/GTF2H5/RIOK1/RPP40/RIOK2/TSR2/SNU13/WDR3/UTP23/NOL10/NGDN/TSR3/MRPS11/NOP14/TBL3/ABT1/RPS28/RCL1/TSR1/FP565260.1/NOB1/NAT10/RPS21/WDR46/RPS14/BMS1/UTP25/FAM207A/RPS16/HEATR1/UTP6/PWP2/DHX37/RPS8/HELB/KRI1/RPS19
GOBP_TERPENOID_BIOSYNTHETIC_PROCESS	GOBP_TERPENOID_BIOSYNTHETIC_PROCESS	15	0.71868	1.85461	0.00759023	0.0651528	0.0545371	8965	tags=53%, list=16%, signal=45%	CYP1A1/HMGCS2/ALDH8A1/ALDH1A2/HMGCS1/RDH10/BCO1/DHRS9
GOMF_2_IRON_2_SULFUR_CLUSTER_BINDING	GOMF_2_IRON_2_SULFUR_CLUSTER_BINDING	22	0.60597	1.72465	0.0077047	0.0660489	0.0552873	8789	tags=73%, list=15%, signal=62%	UQCRFS1/FDX1/UQCRFS1P1/NDUFS1/GLRX5/ISCA2/CISD2/FXN/CISD1/SDHB/ISCA1/FECH/CIAPIN1/ISCU/CISD3/AOX1
GOBP_ATRIAL_SEPTUM_MORPHOGENESIS	GOBP_ATRIAL_SEPTUM_MORPHOGENESIS	15	-0.726474	-1.56799	0.00777484	0.0665306	0.0556904	6931	tags=27%, list=12%, signal=23%	GATA4/TBX5/NKX2-5/ISL1
GOBP_FATTY_ACID_BETA_OXIDATION_USING_ACYL_COA_OXIDASE	GOBP_FATTY_ACID_BETA_OXIDATION_USING_ACYL_COA_OXIDASE	15	0.715788	1.84714	0.00778118	0.0665306	0.0556904	10053	tags=67%, list=18%, signal=55%	EHHADH/ACOX2/ECI2/AMACR/HSD17B4/ACOX1/SCP2/CRAT/CROT/ACAA1
GOMF_RETINOIC_ACID_RECEPTOR_BINDING	GOMF_RETINOIC_ACID_RECEPTOR_BINDING	26	0.581784	1.69575	0.00781921	0.0667687	0.0558898	6118	tags=15%, list=11%, signal=14%	NR0B2/VDR/HMGA1/PPARG
GOMF_RETINOID_X_RECEPTOR_BINDING	GOMF_RETINOID_X_RECEPTOR_BINDING	17	0.670446	1.79805	0.00784649	0.0669146	0.0560119	6118	tags=24%, list=11%, signal=21%	NR0B2/VDR/HMGA1/PPARG
GOBP_PIGMENT_GRANULE_ORGANIZATION	GOBP_PIGMENT_GRANULE_ORGANIZATION	28	0.583175	1.71746	0.00787099	0.0670291	0.0561077	14724	tags=61%, list=26%, signal=45%	PMEL/GPR143/TYRP1/RAB29/AP1G1/TRAPPC6A/RAB32/BCL2/BLOC1S2/AP3B1/SHROOM2/PIKFYVE/BLOC1S6/BLOC1S5/AP3D1/BLOC1S4/RAB38
GOBP_CELLULAR_PROTEIN_COMPLEX_DISASSEMBLY	GOBP_CELLULAR_PROTEIN_COMPLEX_DISASSEMBLY	221	0.299647	1.25315	0.00788037	0.0670291	0.0561077	13593	tags=48%, list=24%, signal=36%	CAPZA3/SCIN/VIL1/SPTBN2/MRPL53/NCKAP5/MRPL34/DNAJC6/CFL2/MRPS28/EIF5A2/MRPL50/F2RL1/MRPS35/TWF1/APEH/RDX/CAPZA2/HSPA8/MRPS36/LIMA1/MRPL44/MRPL19/ETF1/MRPL15/GFM2/EPS8/MRPL49/MRPL35/MRPS30/MRPL13/MRPS16/MRPS22/GSPT1/FGF13/MRPL3/MRPL1/TRPV4/MRPS18A/MRPL47/MRPL54/ADD3/MRPS18B/MRPL48/MRPS9/DSTN/MRPS10/DMTN/NAPA/ABCE1/MRPL30/MRPS33/CAMSAP3/MRPL42/GSPT2/CARMIL1/MRPL45/VPS4B/SEMA5A/SPTBN4/MRPL41/PIK3CA/…
GOBP_NEGATIVE_REGULATION_OF_PROTEIN_POLYMERIZATION	GOBP_NEGATIVE_REGULATION_OF_PROTEIN_POLYMERIZATION	77	0.387918	1.40768	0.00799408	0.0679083	0.0568437	11169	tags=35%, list=20%, signal=28%	INPP5J/CAPZA3/SCIN/VIL1/SPTBN2/TUBB4A/SLIT2/PFN2/TWF1/TMSB15A/RDX/CAPZA2/MKKS/EPS8/PRKCD/ADD3/DMTN/CARMIL1/VDAC2/SPTBN4/MAPRE1/TMSB4Y/ARFGEF1/MYADM/SPTBN1/SNCA/MAP2
GOBP_REGULATION_OF_CHOLESTEROL_BIOSYNTHETIC_PROCESS	GOBP_REGULATION_OF_CHOLESTEROL_BIOSYNTHETIC_PROCESS	48	0.491076	1.61163	0.00802201	0.0680573	0.0569684	13523	tags=50%, list=24%, signal=38%	CYP7A1/SC5D/TM7SF2/IDI1/FGF1/DHCR7/CYP51A1/HMGCS1/HMGCR/LPCAT3/GPAM/FDFT1/ERLIN2/SREBF2/PRKAA1/GGPS1/ERLIN1/MBTPS2/SOD1/SQLE/ELOVL6/RAN/APOB/SCAP
GOBP_HEME_TRANSPORT	GOBP_HEME_TRANSPORT	10	0.797736	1.91374	0.00805646	0.0682613	0.0571391	1098	tags=20%, list=2%, signal=20%	HRG/HPX
GOBP_NCRNA_EXPORT_FROM_NUCLEUS	GOBP_NCRNA_EXPORT_FROM_NUCLEUS	38	0.494016	1.54311	0.00807062	0.068293	0.0571657	28787	tags=100%, list=51%, signal=49%	RANBP2/SEH1L/NUP35/PHAX/NCBP2/NUP58/NUP160/NUP98/NUP153/RAN/SSB/NOL6/NUP88/NUP133/NUP50/NUP205/NUP37/NUP54/NPM1/NDC1/NUP155/NUP42/NUP43/NUP93/SEC13/RAE1/POM121/NUP210/NUP214/NUP188/XPOT/POM121C/NUP107/TPR/TSC1/NUP62/AAAS/NUP85
GOCC_MULTIVESICULAR_BODY	GOCC_MULTIVESICULAR_BODY	62	0.43118	1.51026	0.00812167	0.0686365	0.0574532	10705	tags=39%, list=19%, signal=31%	SFTPB/PMEL/SFTPC/CRHBP/SLC2A4/NAPSA/NEDD4L/NDFIP2/SORL1/PRKAR1A/CHMP2B/CHMP5/TSG101/PGA4/RAB11A/CD300LG/CTSH/LAPTM4B/VTA1/CHMP1B/LAMP1/CTSL/CHMP3/CHMP4C
GOMF_TRANSFERASE_ACTIVITY_TRANSFERRING_ONE_CARBON_GROUPS	GOMF_TRANSFERASE_ACTIVITY_TRANSFERRING_ONE_CARBON_GROUPS	223	0.300658	1.25865	0.0081562	0.0688396	0.0576232	13758	tags=37%, list=24%, signal=28%	OTC/METTL21C/PRMT8/GNMT/PNMT/PRDM16/ALDH1L1/METTL24/SETMAR/NSUN7/GATM/METTL7A/COQ3/LCMT2/TRMT10C/ARMT1/SETD3/TPMT/PRMT6/CARNMT1/NDUFAF5/METTL27/CMTR2/BHMT/SETD9/ATPSCKMT/CIAPIN1/TRMT61B/TFB2M/THUMPD3/EEF2KMT/SUZ12/PCMT1/TRMO/SHMT1/HNMT/FTCD/METTL14/PRMT3/TRMT1L/MECOM/FAM98B/TRMT9B/METTL15/TRMT6/MTFMT/FAM98A/TRMT12/PRDM5/SMYD2/NTMT1/BMT2/TRMT2B/PRMT9/ATIC/BHMT2/TRMT5/GCSH/SETDB2/COMTD1/KMT5B/PRDM4…
GOBP_REGULATION_OF_ACTOMYOSIN_STRUCTURE_ORGANIZATION	GOBP_REGULATION_OF_ACTOMYOSIN_STRUCTURE_ORGANIZATION	95	0.373135	1.38726	0.00818577	0.0689916	0.0577505	6778	tags=14%, list=12%, signal=12%	APOA1/FRMD7/PPM1E/WNT11/TACSTD2/SFRP1/TAC1/PFN2/SDC4/LPAR1/ARHGAP6/MKKS/CGNL1
GOCC_TRANSLATION_PREINITIATION_COMPLEX	GOCC_TRANSLATION_PREINITIATION_COMPLEX	18	0.658723	1.80039	0.00819525	0.0689916	0.0577505	11739	tags=50%, list=21%, signal=40%	EIF1B/EIF3CL/DHX29/EIF2S1/EIF3K/EIF3M/EIF3J/EIF3A/EIF3L
GOBP_REGULATION_OF_ARP2_3_COMPLEX_MEDIATED_ACTIN_NUCLEATION	GOBP_REGULATION_OF_ARP2_3_COMPLEX_MEDIATED_ACTIN_NUCLEATION	21	0.609824	1.72781	0.00820822	0.0690122	0.0577677	10624	tags=38%, list=19%, signal=31%	CTNNA2/DNAI3/GMFB/AP1AR/WASL/NCKAP1/ARFIP1/WASF3
GOBP_POSITIVE_REGULATION_OF_CYTOSKELETON_ORGANIZATION	GOBP_POSITIVE_REGULATION_OF_CYTOSKELETON_ORGANIZATION	217	0.2984	1.23046	0.00825862	0.069347	0.058048	12754	tags=30%, list=22%, signal=24%	STAP1/APOA1/CTNNA2/PPM1E/PFN3/SCIN/VIL1/CSF3/OCLN/WNT11/SFRP1/TAC1/PFN2/NPHS1/DNAI3/IQGAP2/GMFB/CFL2/PRKCE/F2RL1/SDC4/LPAR1/AP1AR/FMN1/WASL/NCKAP1/TRPV4/BIN1/BAIAP2/MAPT/SPAG5/DSTN/LIMCH1/JMY/ARFIP1/NOX4/SLAIN2/CX3CL1/ARF6/CARMIL1/VPS4B/SEMA5A/TEK/MAPRE1/RGCC/WASF3/WDR1/RHOA/PDXP/DLG1/SPIRE1/TOGARAM1/SNX9/ACTR2/CDC42/FERMT2/BAG4/BAIAP2L2/CDC42EP4/WASHC5/ARHGEF5/TGFBR1/GPSM2/ACTR3/AKAP9/MET
GOBP_OXIDATIVE_DEMETHYLATION	GOBP_OXIDATIVE_DEMETHYLATION	19	0.631205	1.75686	0.00832338	0.0698014	0.0584284	3834	tags=16%, list=7%, signal=15%	CYP1A2/CYP3A4/CYP3A7
GOBP_AROMATIC_AMINO_ACID_FAMILY_METABOLIC_PROCESS	GOBP_AROMATIC_AMINO_ACID_FAMILY_METABOLIC_PROCESS	32	0.528628	1.60449	0.00833587	0.0698169	0.0584413	6691	tags=34%, list=12%, signal=30%	TAT/TYR/PAH/IYD/TH/ACMSD/QDPR/ASRGL1/HGD/GSTZ1/PCBD1
GOBP_TRNA_THREONYLCARBAMOYLADENOSINE_METABOLIC_PROCESS	GOBP_TRNA_THREONYLCARBAMOYLADENOSINE_METABOLIC_PROCESS	17	0.667721	1.79074	0.00835271	0.0698687	0.0584847	9769	tags=41%, list=17%, signal=34%	CTAG1B/CTAG2/CTAG1A/TRMT10C/TRMT61B/TP53RK/PRORP
GOBP_MAINTENANCE_OF_BLOOD_BRAIN_BARRIER	GOBP_MAINTENANCE_OF_BLOOD_BRAIN_BARRIER	33	0.543685	1.66333	0.00839296	0.0700268	0.058617	6372	tags=30%, list=11%, signal=27%	SH3GL2/OCLN/TJP3/WNK3/GJB6/SLC1A1/MBP/ANGPT1/SLC12A2/CLDN3
GOMF_FAD_BINDING	GOMF_FAD_BINDING	33	0.543572	1.66298	0.00839296	0.0700268	0.058617	12624	tags=58%, list=22%, signal=45%	LDHD/DAO/AIFM1/PRODH/DDO/ACOX2/CRY1/CRY2/ACOX1/AGPS/PRODH2/AOX1/NQO2/CYB5R1/DHCR24/XDH/SQLE/MMACHC/STEAP4
GOMF_RIBOSOME_BINDING	GOMF_RIBOSOME_BINDING	56	0.448776	1.56758	0.00843284	0.0702701	0.0588206	16977	tags=68%, list=30%, signal=48%	CPEB1/MAIP1/EIF5A2/CPEB3/ETF1/TACO1/CPEB4/SPCS1/NAA15/YTHDF3/C1QBP/LETM1/EIF2S1/CPEB2/PRMT3/HSPA5/GUF1/EIF3K/OLA1/SRP19/EIF2A/FMR1/SBDS/YTHDF1/LETM2/EFL1/MRPS27/MTIF3/ERI1/SRP72/EIF6/RICTOR/RPN2/MTOR/GEMIN5/SRP68/EIF3C/OXA1L
GOBP_NEGATIVE_REGULATION_OF_CIRCADIAN_RHYTHM	GOBP_NEGATIVE_REGULATION_OF_CIRCADIAN_RHYTHM	15	0.712576	1.83886	0.00844949	0.0703195	0.058862	6418	tags=33%, list=11%, signal=30%	PASD1/CRH/CIPC/CRY1/CRY2
GOBP_VITAMIN_TRANSPORT	GOBP_VITAMIN_TRANSPORT	41	0.513557	1.64495	0.00846431	0.0703535	0.0588905	8540	tags=44%, list=15%, signal=37%	APOA1/GC/TTPA/FOLR3/SLC2A2/SLC19A2/LRP2/AFM/SLC19A3/CUBN/AMN/SLC52A3/ABCG2/LMBRD1/SLC2A8/FOLR1/TCN1/TCN2
GOBP_NEGATIVE_REGULATION_OF_LIPID_METABOLIC_PROCESS	GOBP_NEGATIVE_REGULATION_OF_LIPID_METABOLIC_PROCESS	100	0.357951	1.34063	0.00852344	0.0706841	0.0591672	10048	tags=26%, list=18%, signal=21%	APOC3/APOA2/CYP7A1/MIR33A/SLC22A13/PDE3B/DGAT2/FGF19/ATP1A1/PLIN5/SOX9/CEACAM1/SORL1/INSIG1/ACADL/PIP4K2C/PPP2R5A/BMP2/BMP5/ENHO/GPER1/MALRD1/ORMDL2/ERLIN2/MIR132/PIK3IP1
GOBP_NEGATIVE_REGULATION_OF_VASCULATURE_DEVELOPMENT	GOBP_NEGATIVE_REGULATION_OF_VASCULATURE_DEVELOPMENT	129	0.335247	1.30086	0.00852564	0.0706841	0.0591672	6118	tags=18%, list=11%, signal=16%	HRG/MIR15A/APOH/KLK3/CNMD/MIR30E/MIR494/MIR329-1/MIR505/PDE3B/MIR30B/CCN6/MIR200B/IL17F/MIR640/MIR221/KLF4/MIR29A/MIR222/MIR361/SYNJ2BP/SLC12A2/PPARG
GOBP_RESPONSE_TO_ETHANOL	GOBP_RESPONSE_TO_ETHANOL	126	0.336431	1.30607	0.00867673	0.071714	0.0600293	6372	tags=19%, list=11%, signal=17%	NR0B2/CRH/CYP7A1/ADCYAP1/SLC10A1/OXCT1/RBP4/CSF3/ADH6/CRHBP/SLC2A4/TH/CAT/HPGD/CA3/CLDN7/GOT2/ITPR2/PRKCE/GGH/CDO1/KCNC2/CPT1A/CLDN3
GOBP_POSITIVE_REGULATION_OF_TRANSMEMBRANE_TRANSPORT	GOBP_POSITIVE_REGULATION_OF_TRANSMEMBRANE_TRANSPORT	204	0.300482	1.22708	0.00868098	0.071714	0.0600293	9817	tags=29%, list=17%, signal=24%	LRRC52/CFTR/LRRC38/KCNE5/SLC34A1/KCNA1/PLCG2/ITLN1/KCNJ11/OCLN/GPC3/CA2/WNK3/HAP1/STAC2/TRDN/ACE2/CLTRN/ACSL1/ANK3/FGF19/ARC/AMIGO1/RGN/CCL2/NIPSNAP2/PDZK1/ANK2/TESC/NR4A3/KLF15/KCNC2/FGF14/GAL/PLP1/KCNQ1/CXCL10/CHP1/ATPSCKMT/PINK1/CXCL11/ADRB2/OSBPL8/ABCB1/GSTO1/CACNB2/F2RL3/PRKCI/GPER1/CALM2/AKAP6/COX17/NFE2L2/PSEN1/SLC9A3R1/IGF1/HSPA2/CX3CL1/KIF5B
GOBP_REGULATION_OF_MITOCHONDRIAL_MEMBRANE_PERMEABILITY	GOBP_REGULATION_OF_MITOCHONDRIAL_MEMBRANE_PERMEABILITY	72	0.405305	1.48431	0.00868266	0.071714	0.0600293	14174	tags=50%, list=25%, signal=38%	SLC25A5/ACAA2/MIR29A/SLC35F6/CHCHD10/PPIF/MUL1/PMAIP1/BOK/TMEM14A/FZD9/SFN/MOAP1/MPV17L/BCL2/ALKBH7/VDAC2/BLOC1S2/MAPK8/BNIP3/GSK3B/YWHAB/TFDP2/TP73/YWHAE/DYNLT1/YWHAQ/THEM4/TFDP1/PPP1R13B/ATF2/YWHAH/HK2/BAK1/TMEM102/TP53BP2
GOBP_EPITHELIAL_CELL_DEVELOPMENT	GOBP_EPITHELIAL_CELL_DEVELOPMENT	206	0.301081	1.23816	0.00869989	0.0717659	0.0600727	6962	tags=17%, list=12%, signal=15%	NKX6-1/SLC9A4/TFCP2L1/CNMD/NPHS2/INSM1/PROC/RAB25/GRHL2/MARVELD2/TJP3/SOX8/FOXJ1/NPHS1/SHROOM3/ST14/IHH/KDF1/PLS1/PGR/SLC4A5/EPB41L5/POF1B/KLF5/EXPH5/SOX9/F2RL1/EZR/RDX/CLDN3/HSD17B4/BMP15/SDC1/CLIC4/NKX2-2
GOBP_POSITIVE_REGULATION_OF_PROTEIN_LOCALIZATION_TO_MEMBRANE	GOBP_POSITIVE_REGULATION_OF_PROTEIN_LOCALIZATION_TO_MEMBRANE	126	0.335495	1.30243	0.0087759	0.0723019	0.0605214	11546	tags=37%, list=20%, signal=29%	DPP10/AGR2/VIL1/KCNJ11/SLC51B/WNK3/STAC2/ANK3/PLS1/ZDHHC2/NECAB2/PDZK1/PRKCE/EZR/ACSL3/RAB11FIP2/CHP1/STX3/LGALS3/ERBB2/PMAIP1/SFN/EPHA2/PRKCI/GPER1/FIS1/RAB11A/BCL2/ARF6/KIF5B/MIEF1/PRNP/SLC5A3/PDPK1/MAPK8/SPTBN1/SQSTM1/MIEF2/YWHAB/DLG1/MFF/AP2B1/TFDP2/ZDHHC5/TP73/YWHAE
GOCC_INCLUSION_BODY	GOCC_INCLUSION_BODY	74	0.399252	1.47151	0.00879052	0.0723315	0.0605462	12502	tags=42%, list=22%, signal=33%	SNCB/MIOX/HAP1/PRDM16/NEFM/URB2/AGL/STRADB/HSPB7/PINK1/BAG5/RANBP2/FBXO7/HERPUD1/TDP2/UBQLN1/MAPT/PICALM/PSEN1/BAG3/PRNP/CLU/SQSTM1/STUB1/XRN2/SNCA/TRIM37/WDFY3/LRRK2/NUP98/NUP153
GOMF_PHOSPHATIDYLINOSITOL_BISPHOSPHATE_PHOSPHATASE_ACTIVITY	GOMF_PHOSPHATIDYLINOSITOL_BISPHOSPHATE_PHOSPHATASE_ACTIVITY	23	0.587092	1.67805	0.00882479	0.0725225	0.0607061	14599	tags=61%, list=26%, signal=45%	INPP5J/PIP4P2/PTPMT1/MTM1/MTMR6/INPP4B/PIP4P1/PIKFYVE/PTEN/MTMR2/OCRL/MTMR1/SYNJ1/INPP4A
GOBP_NEGATIVE_REGULATION_OF_VASCULAR_ASSOCIATED_SMOOTH_MUSCLE_CELL_DIFFERENTIATION	GOBP_NEGATIVE_REGULATION_OF_VASCULAR_ASSOCIATED_SMOOTH_MUSCLE_CELL_DIFFERENTIATION	12	0.737773	1.85002	0.00886396	0.0727532	0.0608992	4386	tags=25%, list=8%, signal=23%	FGF9/MIR100/MIR221
GOCC_PLATELET_DENSE_GRANULE	GOCC_PLATELET_DENSE_GRANULE	21	0.60798	1.72259	0.00887827	0.0727796	0.0609213	7906	tags=48%, list=14%, signal=41%	APOH/SPP2/SERPINA4/ITIH3/ABCC4/CLEC3B/CDC37L1/TIMP3/FAM3C/SELENOP
GOMF_CARBON_NITROGEN_LYASE_ACTIVITY	GOMF_CARBON_NITROGEN_LYASE_ACTIVITY	13	0.720198	1.82738	0.00889714	0.0728432	0.0609745	13589	tags=77%, list=24%, signal=59%	HAL/GGACT/CHAC1/CHAC2/SDSL/SDS/FTCD/SRR/APMAP/PAM
GOCC_COATED_VESICLE_MEMBRANE	GOCC_COATED_VESICLE_MEMBRANE	179	0.309019	1.25971	0.00893012	0.072974	0.061084	14372	tags=46%, list=25%, signal=35%	CFTR/SH3GL2/SLC18A2/EPN3/TYRP1/EGF/SYT9/EREG/BTC/AP1M2/LRP2/CD9/SLC17A7/LDLR/FZD5/NCALD/MYO6/TMED7/CD59/SAR1B/HSPA8/AFTPH/VAMP8/SEC23B/SLC2A8/CLINT1/CNIH1/HLA-G/FOLR1/VTI1B/SEC24A/ADRB2/AP1G1/CLTC/CD207/COPB1/PICALM/B2M/TFRC/SEC23IP/HLA-DQA2/RAB5A/CLTA/USO1/VMA21/SREBF2/SEC24B/AP3B1/AP2B1/MCFD2/STX5/AP1S1/IGF2R/COPG2/DAB2/TMEM199/ARCN1/VTI1A/TMED10/FZD4/DENND1A/HLA-H/STX17/HLA-C/TGFA/DIPK2A/HLA-B…
GOMF_PHOSPHOTRANSFERASE_ACTIVITY_FOR_OTHER_SUBSTITUTED_PHOSPHATE_GROUPS	GOMF_PHOSPHOTRANSFERASE_ACTIVITY_FOR_OTHER_SUBSTITUTED_PHOSPHATE_GROUPS	20	0.619585	1.75816	0.00893579	0.072974	0.061084	16000	tags=70%, list=28%, signal=50%	CDS1/SGMS2/CHPT1/SELENOI/AASDHPPT/SGMS1/PIGO/PIGF/CEPT1/SAMD8/PIGN/PTDSS2/GNPTAB/DPAGT1
GOBP_CYTOPLASMIC_TRANSLATION	GOBP_CYTOPLASMIC_TRANSLATION	101	0.347753	1.31367	0.00895319	0.072974	0.061084	28150	tags=95%, list=50%, signal=48%	CPEB1/DPH6/CPEB3/DPH3/ETF1/CPEB4/EIF5/RBM24/EIF3CL/GSPT1/ZC3H15/DHX29/EIF2S3B/CPEB2/GSPT2/EIF3K/EIF3M/YTHDF2/EIF3J/DHX9/EIF3A/DHX36/RWDD1/FMR1/EIF3L/RPS29/RPL15/EIF2B3/DPH2/DNAJC24/CNBP/EIF4A2/EIF2S2/DPH5/TMA7/DRG1/EIF4G1/RPL26L1/RPL22/EIF4H/MTOR/RPS23/NCK1/EIF3F/EIF3C/PKM/RPL26/RPS28/RPL9/MCTS1/DENR/EIF2S3/RPSA/EIF3H/EIF4B/RPL10A/EIF3E/EIF3D/LIN28A/EEF2/RPS21/EIF3G/RPL24/RPL31/DRG2/RPL35A/RPL39/…
GOBP_PROSTANOID_BIOSYNTHETIC_PROCESS	GOBP_PROSTANOID_BIOSYNTHETIC_PROCESS	31	0.542017	1.63781	0.00896598	0.072974	0.061084	5691	tags=19%, list=10%, signal=17%	PLA2G4F/PLA2G3/AVPR1A/PTGDS/PNPLA8/CBR1
GOBP_CELLULAR_OXIDANT_DETOXIFICATION	GOBP_CELLULAR_OXIDANT_DETOXIFICATION	99	0.35979	1.35676	0.00896875	0.072974	0.061084	11264	tags=38%, list=20%, signal=31%	ALB/BMP7/FABP1/IYD/DUOX2/NNT/APOM/CAT/HP/GSTA1/PRDX2/GSTO2/PRDX3/SELENOT/GSTZ1/TXNDC2/FANCC/HBG1/GPX3/MGST2/GSTO1/CD36/PRDX5/GSTP1/NFE2L2/ATP7A/HBB/IPCEF1/DHFRP1/GSR/TXNRD3/MGST3/SELENOS/GCH1/TXNRD2/TXN/DHFR/UBIAD1
GOBP_REGULATION_OF_POSTSYNAPTIC_DENSITY_ORGANIZATION	GOBP_REGULATION_OF_POSTSYNAPTIC_DENSITY_ORGANIZATION	14	0.696188	1.78902	0.00907779	0.0737697	0.06175	1130	tags=14%, list=2%, signal=14%	LRRTM1/GRID2
GOBP_PHOSPHATIDYLINOSITOL_PHOSPHORYLATION	GOBP_PHOSPHATIDYLINOSITOL_PHOSPHORYLATION	57	0.437128	1.52643	0.00921339	0.074779	0.0625949	13001	tags=49%, list=23%, signal=38%	PIK3C2G/P3R3URF/PIP5K1B/IMPA2/CISH/SOCS4/IP6K3/SOCS2/PIP4K2C/FAM126B/SOCS6/PIK3C2A/TTC7B/BPNT1/PI4K2B/BPNT2/IMPA1/PIK3CA/PIK3R3/INPP1/EFR3B/PIK3CB/PIK3R1/PIKFYVE/IP6K1/PI4K2A/EFR3A/PIK3C3
GOBP_RESPONSE_TO_CAMP	GOBP_RESPONSE_TO_CAMP	92	0.371827	1.37659	0.00923448	0.0748575	0.0626606	6855	tags=23%, list=12%, signal=20%	CFTR/AGXT/TYR/HCN2/CPS1/SLC26A3/DUOX2/CRHBP/PKLR/FDX1/FOSB/PCK1/GPD1/REN/ITPR2/HCN4/EZR/CDO1/AQP1/SDC1/KCNQ1
GOBP_TRNA_TRANSPORT	GOBP_TRNA_TRANSPORT	37	0.494007	1.53785	0.00928008	0.0751343	0.0628923	28787	tags=100%, list=51%, signal=49%	RANBP2/SEH1L/NUP35/NUP58/NUP160/NUP98/NUP153/RAN/TOMM20L/SSB/NOL6/TOMM20/NUP88/NUP133/NUP50/NUP205/NUP37/NUP54/NDC1/NUP155/NUP42/NUP43/NUP93/SEC13/RAE1/POM121/NUP210/NUP214/NUP188/XPOT/YBX1/POM121C/NUP107/TPR/NUP62/AAAS/NUP85
GOBP_CELLULAR_RESPONSE_TO_ALKALOID	GOBP_CELLULAR_RESPONSE_TO_ALKALOID	32	0.524363	1.59155	0.00933866	0.0755153	0.0632113	3492	tags=25%, list=6%, signal=23%	CRH/TMEM38A/SLC34A1/PPARGC1A/CRHBP/DDC/TH/TMEM38B
GOBP_RESPONSE_TO_SALT_STRESS	GOBP_RESPONSE_TO_SALT_STRESS	26	0.575099	1.67627	0.00939514	0.0758785	0.0635153	7707	tags=31%, list=14%, signal=27%	SLC9A4/PAPPA2/TACR3/TH/EFHD1/AQP1/AKR1B1/MICU1
GOCC_PHAGOCYTIC_VESICLE	GOCC_PHAGOCYTIC_VESICLE	135	0.330422	1.29047	0.00943119	0.0760759	0.0636805	12491	tags=33%, list=22%, signal=26%	ATP6V0A4/ATP6V0D2/ANXA3/ATP6V0B/SYT7/PIP4P2/ATP6V0D1/ATP6V0E2/RAB9A/VAMP8/RAB11FIP5/STXBP1/HLA-G/RAB14/PIK3R4/RAB11FIP1/CLCN3/CD36/ATP6V0E1/RAB11A/B2M/LAMP2/RAB10/ATP7A/RAB32/ATG5/SNX3/STXBP3/KIF5B/APPL1/RAB5A/LAMP1/RAB7A/ZDHHC5/RAB20/RAP1A/ATP6V0A1/CDC42/STX12/PIP4P1/CDC42EP4/HLA-H/PIKFYVE/HLA-C/ITGAV
GOBP_VESICLE_BUDDING_FROM_MEMBRANE	GOBP_VESICLE_BUDDING_FROM_MEMBRANE	109	0.348216	1.29773	0.00960055	0.0773469	0.0647444	15737	tags=62%, list=28%, signal=45%	SLC2A4/F5/INSIG1/CD59/SAR1B/SNAP91/SEC23B/CHMP5/CUL3/WASL/CNIH1/PPP6C/FOLR1/SEC24A/VAPA/TRAPPC6A/PRKCI/RAB1A/PICALM/NAPA/GOLPH3/SNX3/SEC23IP/TRAPPC4/F8/FNBP1L/TRAPPC6B/USO1/RAB7A/SCFD1/CHMP4C/ARFGAP3/SEC24B/AP3B1/NSF/MCFD2/STX5/CTSC/RAB1B/PREB/VAPB/DNM1/TMED10/TGFA/PPP6R3/KLHL12/CHMP6/SCAP/SAR1A/RILP/GOLPH3L/SEC16A/LMAN1/TFG/AP3D1/SEC24C/PEF1/TRAPPC10/TRAPPC3/SEC22B/TRAPPC9/SEC23A/TRAPPC2L/SEC31A…
GOBP_POSITIVE_REGULATION_OF_ACTIN_CYTOSKELETON_REORGANIZATION	GOBP_POSITIVE_REGULATION_OF_ACTIN_CYTOSKELETON_REORGANIZATION	18	0.651009	1.77931	0.0096205	0.0774126	0.0647994	2041	tags=11%, list=4%, signal=11%	STAP1/CSF3
GOBP_REGULATION_OF_ACTIN_NUCLEATION	GOBP_REGULATION_OF_ACTIN_NUCLEATION	30	0.556502	1.67018	0.00970798	0.0780207	0.0653084	7857	tags=30%, list=14%, signal=26%	CTNNA2/SCIN/VIL1/DNAI3/GMFB/AP1AR/FMN1/WASL/NCKAP1
GOBP_NEGATIVE_REGULATION_OF_CELLULAR_RESPONSE_TO_VASCULAR_ENDOTHELIAL_GROWTH_FACTOR_STIMULUS	GOBP_NEGATIVE_REGULATION_OF_CELLULAR_RESPONSE_TO_VASCULAR_ENDOTHELIAL_GROWTH_FACTOR_STIMULUS	18	0.649946	1.7764	0.0097223	0.0780402	0.0653248	4182	tags=22%, list=7%, signal=21%	HRG/MIR329-1/IL12B/CADM4
GOBP_REGULATION_OF_PROGRAMMED_NECROTIC_CELL_DEATH	GOBP_REGULATION_OF_PROGRAMMED_NECROTIC_CELL_DEATH	26	0.572141	1.66764	0.00975882	0.0782326	0.0654858	4386	tags=19%, list=8%, signal=18%	MIR485/MIR103A1/SLC25A4/ASAH1/MIR221
GOMF_PRENYLTRANSFERASE_ACTIVITY	GOMF_PRENYLTRANSFERASE_ACTIVITY	17	0.658952	1.76722	0.00977013	0.0782326	0.0654858	12955	tags=71%, list=23%, signal=55%	PDSS2/COQ2/PDSS1/CHM/FDFT1/PTAR1/NUS1/PGGT1B/COX10/UBIAD1/GGPS1/DHDDS
GOBP_REGULATION_OF_MYELOID_LEUKOCYTE_MEDIATED_IMMUNITY	GOBP_REGULATION_OF_MYELOID_LEUKOCYTE_MEDIATED_IMMUNITY	51	0.461274	1.55118	0.00981052	0.0784602	0.0656763	7283	tags=22%, list=13%, signal=19%	STAP1/PLA2G3/CD177/ARG1/CXCL6/DNASE1/DNASE1L3/F2RL1/VAMP8/SNX4/STXBP1
GOCC_CORTICAL_ACTIN_CYTOSKELETON	GOCC_CORTICAL_ACTIN_CYTOSKELETON	78	0.408249	1.46386	0.00992235	0.0791582	0.0662606	4099	tags=13%, list=7%, signal=12%	PVALB/MYZAP/CALB1/MYRIP/SPTBN2/SHROOM3/COBL/GYS2/PLS1/CDH1
GOMF_PEPTIDE_TRANSMEMBRANE_TRANSPORTER_ACTIVITY	GOMF_PEPTIDE_TRANSMEMBRANE_TRANSPORTER_ACTIVITY	35	0.507004	1.58123	0.00992701	0.0791582	0.0662606	14251	tags=49%, list=25%, signal=36%	CDH17/SLC15A2/SLC13A3/AZGP1/TIMM17A/TIMM23/TOMM70/TOMM22/TOMM40L/TIMM23B/TMED10/TIMM22/SLC15A1/TOMM20L/SEC63/TOMM20/MCL1
GOBP_METHIONINE_METABOLIC_PROCESS	GOBP_METHIONINE_METABOLIC_PROCESS	16	0.663983	1.763	0.00993401	0.0791582	0.0662606	14405	tags=81%, list=25%, signal=61%	GNMT/MSRA/APIP/BHMT/ENOPH1/MAT1A/MTHFD2L/SMS/ADI1/BHMT2/MTHFD1/MTAP/MTRR
GOBP_POSITIVE_REGULATION_OF_MITOCHONDRIAL_FISSION	GOBP_POSITIVE_REGULATION_OF_MITOCHONDRIAL_FISSION	17	0.65847	1.76593	0.00997262	0.0793694	0.0664374	12205	tags=76%, list=21%, signal=60%	MUL1/MARCHF5/PINK1/FIS1/MIEF1/VPS35/BNIP3/MIEF2/MFF/MCU/SPIRE1/KDR/DNM1L
GOBP_ACUTE_INFLAMMATORY_RESPONSE	GOBP_ACUTE_INFLAMMATORY_RESPONSE	105	0.347081	1.30613	0.0100085	0.0795582	0.0665954	6190	tags=20%, list=11%, signal=18%	SERPINC1/ORM2/AHSG/ORM1/ADCYAP1/MBL2/HPR/REG3G/VNN1/TAC1/DNASE1/MRGPRX1/HP/PTGER3/KLKB1/DNASE1L3/EDNRB/REG3A/C2CD4A/PPARG/F12
GOBP_PROTEOGLYCAN_METABOLIC_PROCESS	GOBP_PROTEOGLYCAN_METABOLIC_PROCESS	87	0.366848	1.33647	0.0100444	0.0797471	0.0667535	3768	tags=10%, list=7%, signal=10%	SPOCK3/HS6ST3/BMPR1B/CNMD/HYAL4/GAL3ST3/HS6ST2/UST/IHH
GOBP_QUATERNARY_AMMONIUM_GROUP_TRANSPORT	GOBP_QUATERNARY_AMMONIUM_GROUP_TRANSPORT	13	0.71435	1.81254	0.0100758	0.0798999	0.0668814	8346	tags=62%, list=15%, signal=53%	SLC25A48/SLC6A20/SLC22A16/PDZK1/SLC22A4/SLC25A20/SLC22A1/SLC25A47
GOCC_MITOCHONDRIA_ASSOCIATED_ENDOPLASMIC_RETICULUM_MEMBRANE	GOCC_MITOCHONDRIA_ASSOCIATED_ENDOPLASMIC_RETICULUM_MEMBRANE	20	0.611782	1.73602	0.0101568	0.0804378	0.0673317	14724	tags=70%, list=26%, signal=52%	BCL2L10/TMX2/PDZD8/ACSL4/SERAC1/RAB32/ATG5/TMEM41B/CANX/ZFYVE1/STX17/BCAP31/TOMM20/RAB38
GOBP_CHOLESTEROL_CATABOLIC_PROCESS	GOBP_CHOLESTEROL_CATABOLIC_PROCESS	11	0.747257	1.84994	0.0101682	0.0804378	0.0673317	3701	tags=36%, list=7%, signal=34%	CYP7A1/CEL/AKR1D1/CYP39A1
GOBP_ODONTOGENESIS_OF_DENTIN_CONTAINING_TOOTH	GOBP_ODONTOGENESIS_OF_DENTIN_CONTAINING_TOOTH	84	0.397172	1.42601	0.0101943	0.0805473	0.0674234	2820	tags=12%, list=5%, signal=11%	KLK4/ODAM/BMP7/SOSTDC1/SLC34A1/AMTN/AMELX/ENAM/CA2/EDAR
GOCC_EUKARYOTIC_TRANSLATION_INITIATION_FACTOR_3_COMPLEX	GOCC_EUKARYOTIC_TRANSLATION_INITIATION_FACTOR_3_COMPLEX	17	0.657068	1.76217	0.0102763	0.0810978	0.0678842	11739	tags=47%, list=21%, signal=37%	EIF3CL/DDX3X/ABCE1/EIF3K/EIF3M/EIF3J/EIF3A/EIF3L
GOBP_RESPONSE_TO_TEMPERATURE_STIMULUS	GOBP_RESPONSE_TO_TEMPERATURE_STIMULUS	228	0.290307	1.19193	0.010294	0.0811396	0.0679191	12695	tags=34%, list=22%, signal=26%	CALCA/CPB2/ADRB1/SST/PPARGC1A/GMPR/PKLR/MTCO2P12/ACOT11/CAMK2B/BAG1/DNAJA4/ARPP21/HSPH1/HSP90AA1/FGF1/PPARG/TRPM3/DNAJA1/HSPA8/SLC52A3/HSPD1/CXCL10/FOXO1/TMEM135/GCLC/BAG5/TRPV4/DNAJA2/ADRB2/RANBP2/SAXO1/DNAJB1/CLPB/MAPT/TCIM/DNAJC3/EIF2AK3/HSP90AB3P/SEH1L/EIF2S1/RPA3/NUP35/SUMO1/IGF1/HSPA2/MMP24/MAPK1/BAG3/HSBP1/DNAJA3/TFEC/GSK3B/STUB1/PRKAA1/DHX36/THBS1/YWHAE/NGFR/NTSR1/BAG4/NUP58/NUP160/HDAC2/…
GOBP_ESTABLISHMENT_OF_PROTEIN_LOCALIZATION_TO_MITOCHONDRIAL_MEMBRANE	GOBP_ESTABLISHMENT_OF_PROTEIN_LOCALIZATION_TO_MITOCHONDRIAL_MEMBRANE	53	0.452915	1.53992	0.0103433	0.0814301	0.0681623	13401	tags=53%, list=24%, signal=40%	MAIP1/TIMM10B/HSP90AA1/HSPA4/PMAIP1/TIMM8B/TIMM10/SFN/MOAP1/COX18/TOMM70/BCL2/SAMM50/MAPK8/TOMM22/YWHAB/AP3B1/TFDP2/TP73/YWHAE/TIMM13/YWHAQ/TIMM22/CALM1/TIMM9/TFDP1/PPP1R13B/YWHAH
GOBP_GLYCOLYTIC_PROCESS_THROUGH_FRUCTOSE_6_PHOSPHATE	GOBP_GLYCOLYTIC_PROCESS_THROUGH_FRUCTOSE_6_PHOSPHATE	28	0.572391	1.6857	0.0104336	0.0820082	0.0686462	5707	tags=21%, list=10%, signal=19%	SLC4A1/ALDOB/PKLR/BPGM/PFKM/ENO3
GOBP_GLUTATHIONE_DERIVATIVE_METABOLIC_PROCESS	GOBP_GLUTATHIONE_DERIVATIVE_METABOLIC_PROCESS	21	0.59916	1.6976	0.0104417	0.0820082	0.0686462	11867	tags=52%, list=21%, signal=41%	GSTA3/GSTA1/GSTO2/GSTZ1/GSTA2/MGST2/GSTO1/GSTP1/GSTM3/MGST3/ESD
GOBP_DNA_REPLICATION_INDEPENDENT_NUCLEOSOME_ORGANIZATION	GOBP_DNA_REPLICATION_INDEPENDENT_NUCLEOSOME_ORGANIZATION	54	0.440847	1.5112	0.0104657	0.0820978	0.0687212	2922	tags=11%, list=5%, signal=11%	H4C6/H4C4/H4C2/H4C1/H4C13/H4C3
GOBP_AMINO_ACID_BETAINE_METABOLIC_PROCESS	GOBP_AMINO_ACID_BETAINE_METABOLIC_PROCESS	17	0.654945	1.75647	0.0104798	0.0821108	0.0687321	10521	tags=88%, list=19%, signal=72%	BBOX1/ACADM/CPT1A/CHDH/ACADL/CPT2/SLC22A4/ALDH9A1/BHMT/CRAT/CROT/DMGDH/ALDH7A1/SHMT1/TMLHE
GOBP_NEGATIVE_REGULATION_OF_BINDING	GOBP_NEGATIVE_REGULATION_OF_BINDING	157	0.325735	1.28196	0.0105078	0.0822313	0.068833	5023	tags=7%, list=9%, signal=6%	CFHR5/CFHR2/FRMD7/WFIKKN2/CFHR1/PCSK9/XIRP1/EPB41L5/HAND2/HABP4/DKK1
GOMF_LONG_CHAIN_FATTY_ACID_COA_LIGASE_ACTIVITY	GOMF_LONG_CHAIN_FATTY_ACID_COA_LIGASE_ACTIVITY	14	0.69304	1.78093	0.0106204	0.0830141	0.0694883	8124	tags=57%, list=14%, signal=49%	SLC27A2/ACSL1/ACSL6/SLC27A5/ACSBG1/ACSL3/SLC27A4/ACSL4
GOBP_REGULATION_OF_CHOLESTEROL_EFFLUX	GOBP_REGULATION_OF_CHOLESTEROL_EFFLUX	41	0.505746	1.61994	0.0107114	0.0835783	0.0699605	3597	tags=20%, list=6%, signal=18%	APOA1/PON1/MIR130B/EGF/MIR33A/CES1/TTC39B/ABCA8
GOBP_REGULATION_OF_NOTCH_SIGNALING_PATHWAY	GOBP_REGULATION_OF_NOTCH_SIGNALING_PATHWAY	108	0.347234	1.30133	0.0107234	0.0835783	0.0699605	8828	tags=22%, list=16%, signal=19%	BMP7/KIT/NEURL1/EGF/CNTN6/MAGEA1/TSPAN5/MIR1224/TSPEAR/NOTCH2NLB/ASCL1/GAS2/CHAC1/GALNT11/SYNJ2BP/GATA5/DLK1/ELF3/PDCD10/CD46/LLGL2/ENHO/TCIM/PRKCI
GOCC_NEURON_PROJECTION_TERMINUS	GOCC_NEURON_PROJECTION_TERMINUS	128	0.343078	1.33349	0.0107309	0.0835783	0.0699605	3223	tags=13%, list=6%, signal=13%	CALCA/CHRM1/UNC13C/CALB1/ADCYAP1/SLC18A2/KCNA1/SNCB/CCK/CASR/CRHBP/GRIK5/FLRT1/FLRT3/CNGB1/GOT1/TH
GOBP_PROTEIN_LOCALIZATION_TO_CELL_SURFACE	GOBP_PROTEIN_LOCALIZATION_TO_CELL_SURFACE	67	0.409963	1.47082	0.0107651	0.0837455	0.0701004	11718	tags=34%, list=21%, signal=27%	CD177/EGF/MIR520B/ERBB4/WNT11/GPD1L/NEDD4L/ASTN2/ANK2/ANGPT1/RAB11FIP5/STX3/RAB11A/PIGK/PICALM/ARF6/FGF7/COMMD1/AP3B1/TOR1A/CTNNB1/LEPROT/RIC3
GOBP_MESENCHYMAL_CELL_APOPTOTIC_PROCESS	GOBP_MESENCHYMAL_CELL_APOPTOTIC_PROCESS	12	0.727698	1.82476	0.0107947	0.0837768	0.0701267	860	tags=17%, list=2%, signal=16%	POU3F4/BMP7
GOBP_REGULATION_OF_BILE_ACID_BIOSYNTHETIC_PROCESS	GOBP_REGULATION_OF_BILE_ACID_BIOSYNTHETIC_PROCESS	12	0.727538	1.82436	0.0107947	0.0837768	0.0701267	3902	tags=33%, list=7%, signal=31%	CYP7A1/MIR33A/CES1/FGF19
GOMF_TRANSLATION_REPRESSOR_ACTIVITY_MRNA_REGULATORY_ELEMENT_BINDING	GOMF_TRANSLATION_REPRESSOR_ACTIVITY_MRNA_REGULATORY_ELEMENT_BINDING	15	0.700318	1.80722	0.010842	0.0840445	0.0703508	15267	tags=87%, list=27%, signal=63%	PAIP2B/CPEB1/CPEB3/CPEB4/PURA/SHMT1/CPEB2/DHFRP1/PAIP2/DHFR/ZNF540/TYMS/CELF4
GOBP_REGULATION_OF_CIRCADIAN_RHYTHM	GOBP_REGULATION_OF_CIRCADIAN_RHYTHM	118	0.338977	1.27002	0.0108758	0.084165	0.0704516	7783	tags=18%, list=14%, signal=15%	PASD1/CRH/MTNR1B/ADRB1/SPSB4/PPARGC1A/USP2/NPS/CIPC/PTGDS/KLF10/FBXL17/PPARG/CRY1/NR1D2/CRY2/PRKAA2/GNA11/NPY2R/ADCY1/FBXL3
GOBP_PROTEIN_LOCALIZATION_TO_ENDOSOME	GOBP_PROTEIN_LOCALIZATION_TO_ENDOSOME	25	0.589663	1.70226	0.0108832	0.084165	0.0704516	10528	tags=44%, list=19%, signal=36%	EGF/ABHD17C/SORL1/EZR/RDX/PACSIN2/TOLLIP/ABHD17B/TMEM30A/ARF6/VPS35
GOBP_PTERIDINE_CONTAINING_COMPOUND_METABOLIC_PROCESS	GOBP_PTERIDINE_CONTAINING_COMPOUND_METABOLIC_PROCESS	33	0.530342	1.62251	0.0109171	0.084328	0.070588	14865	tags=70%, list=26%, signal=52%	ALDH1L1/QDPR/GGH/PCBD1/PTS/FOLR1/MTHFS/MTHFD2L/SPR/SHMT1/FTCD/DHFRP1/GCH1/ATIC/DHFR/DHFR2/SLC46A1/MTHFD1/PCBD2/GART/PIPOX/MTRR/TYMS
GOBP_EXPORT_ACROSS_PLASMA_MEMBRANE	GOBP_EXPORT_ACROSS_PLASMA_MEMBRANE	58	0.425359	1.47997	0.010959	0.0845523	0.0707758	8515	tags=31%, list=15%, signal=26%	KCNE5/ATP4B/ATP12A/KCNE1B/ATP4A/ATP2B3/ATP1A1/SLC15A2/SLC4A4/PDZK1/SLC22A2/ABCC4/SLC40A1/KCNQ1/ABCG2/SLC17A3/KCNK5/ABCB1
GOMF_PROTEIN_SERINE_THREONINE_PHOSPHATASE_ACTIVITY	GOMF_PROTEIN_SERINE_THREONINE_PHOSPHATASE_ACTIVITY	101	0.343539	1.29775	0.0111019	0.0855539	0.0716142	12839	tags=45%, list=23%, signal=35%	DUSP15/PPM1E/MYH8/CYCS/LRRC39/PPM1H/DUSP26/PPA2/DUSP8/LRRC2/PDP1/PPM1A/CTDSPL/DUSP9/PDP2/PPP2R1B/CDC14C/PHLPP2/DUSP3/PPP2CA/PTPMT1/PPP6C/MTMR6/PPM1B/PPP2CB/PPTC7/PPP1CB/UBLCP1/PPM1L/CPPED1/CDC14B/DUSP5/PGAM5/LRRC40/PHLPP1/PPM1K/DUSP14/DUSP6/SSU72/LRRK2/PTEN/DUSP16/PPP1R3D/PPP4R1/PPP3CB
GOMF_PHOSPHATIDYLINOSITOL_PHOSPHATE_BINDING	GOMF_PHOSPHATIDYLINOSITOL_PHOSPHATE_BINDING	171	0.308352	1.24471	0.0111187	0.0855826	0.0716382	11885	tags=37%, list=21%, signal=29%	KCNJ1/AMER3/TTPA/SDCBP2/GSDMC/SCIN/VIL1/AMER2/SYT9/PLCZ1/PFN2/RLBP1/STXBP6/IQGAP2/PLEKHB2/SYT7/VEPH1/CLVS2/TWF1/RAG2/EXOC1L/KCNQ1/SNX13/SNAP91/DENND1B/SNX19/SESTD1/FRMPD4/SNX24/PLEK2/OSBP/PLA2G4A/OSBPL8/SNX14/MAPT/FZD7/PLEKHA3/MYO10/PICALM/LAPTM4B/ANXA9/GOLPH3/SNX3/ARFIP1/CERT1/LANCL2/MAPKAP1/KIF16B/WIPI1/SNX18/FCHO2/SDCBP/COMMD1/VPS36/SNX12/SNX11/ZFYVE1/ZFYVE16/SAP30L/SNX5/WIPI2/FERMT2/MARK1
GOBP_POSITIVE_REGULATION_OF_TRIGLYCERIDE_LIPASE_ACTIVITY	GOBP_POSITIVE_REGULATION_OF_TRIGLYCERIDE_LIPASE_ACTIVITY	11	0.738343	1.82787	0.0111602	0.0856723	0.0717133	360	tags=27%, list=1%, signal=27%	APOA5/APOA1/APOH
GOMF_ALDEHYDE_LYASE_ACTIVITY	GOMF_ALDEHYDE_LYASE_ACTIVITY	11	0.738496	1.82825	0.0111602	0.0856723	0.0717133	1024	tags=18%, list=2%, signal=18%	CYP17A1/ALDOB
GOBP_VIRAL_RELEASE_FROM_HOST_CELL	GOBP_VIRAL_RELEASE_FROM_HOST_CELL	33	0.529548	1.62008	0.0111695	0.0856723	0.0717133	16412	tags=67%, list=29%, signal=47%	PC/CHMP2B/TRIM15/TSG101/VAPA/DDB1/VPS37B/VPS4B/PPID/TRIM13/RAB7A/CHMP3/CHMP4C/MID2/TRIM26/TRIM35/IST1/TRIM32/TRIM21/PPIA/CAV2/VPS4A
GOBP_REGULATION_OF_AUTOPHAGY_OF_MITOCHONDRION	GOBP_REGULATION_OF_AUTOPHAGY_OF_MITOCHONDRION	31	0.534008	1.6136	0.011192	0.0857442	0.0717734	26511	tags=100%, list=47%, signal=53%	FZD5/PINK1/VDAC1/FBXO7/VPS13D/HIF1A/SREBF2/BNIP3/DNM1L/RNF41/USP30/VPS13C/HTRA2/HTT/HAX1/BNIP3L/PARK7/TIGAR/CSNK2A2/SREBF1/USP36/PRKN/CTTN/GSK3A/HDAC6/TSPO/FBXW7/CAMKK2/ATP13A2/TP53/TSC2
GOBP_REGULATION_OF_PRODUCTION_OF_MOLECULAR_MEDIATOR_OF_IMMUNE_RESPONSE	GOBP_REGULATION_OF_PRODUCTION_OF_MOLECULAR_MEDIATOR_OF_IMMUNE_RESPONSE	145	0.315869	1.25668	0.0112867	0.0863692	0.0722967	1752	tags=6%, list=3%, signal=5%	APOA1/PGC/APOA2/CLNK/ARG1/HPX/KLK7/RBP4
GOBP_NEGATIVE_REGULATION_OF_SUPRAMOLECULAR_FIBER_ORGANIZATION	GOBP_NEGATIVE_REGULATION_OF_SUPRAMOLECULAR_FIBER_ORGANIZATION	157	0.32409	1.27549	0.0113223	0.0865403	0.0724399	11169	tags=28%, list=20%, signal=23%	INPP5J/CTNNA2/FRMD7/CAPZA3/SCIN/VIL1/SPTBN2/TUBB4A/SLIT2/TACSTD2/PFN2/DNAI3/LDLR/GMFB/TWF1/TMSB15A/RDX/ARHGAP6/CAPZA2/HSPA8/LIMA1/MKKS/CGNL1/EPS8/PRKCD/VBP1/FGF13/ADD3/DMTN/PPP1R9A/CAMSAP3/SMAD4/CARMIL1/SPTBN4/MAPRE1/CLU/PIK3CA/TMSB4Y/ARFGEF1/MYADM/SPTBN1/CLASP2/SNCA/MAP2
GOBP_RESPONSE_TO_NICOTINE	GOBP_RESPONSE_TO_NICOTINE	43	0.472481	1.56907	0.0114103	0.0871116	0.0729181	3223	tags=14%, list=6%, signal=13%	NKX6-1/PPP1R1B/PDX1/KCNJ11/CHRNA4/TH
GOBP_PHOSPHORYLATED_CARBOHYDRATE_DEPHOSPHORYLATION	GOBP_PHOSPHORYLATED_CARBOHYDRATE_DEPHOSPHORYLATION	17	0.648078	1.73806	0.0114973	0.0876733	0.0733883	14207	tags=71%, list=25%, signal=53%	INPP5J/G6PC/IMPA2/BPNT1/BPNT2/IMPA1/INPP1/PTEN/MTMR2/INPP5A/OCRL/SYNJ1
GOBP_CALCIUM_IMPORT_INTO_THE_MITOCHONDRION	GOBP_CALCIUM_IMPORT_INTO_THE_MITOCHONDRION	13	0.710271	1.80219	0.0115282	0.087768	0.0734675	11059	tags=77%, list=19%, signal=62%	MAIP1/MICU2/AFG3L2/SMDT1/MICU1/VDAC1/OPA1/MICU3/MCUR1/MCU
GOMF_PHOSPHATIDYLINOSITOL_BISPHOSPHATE_BINDING	GOMF_PHOSPHATIDYLINOSITOL_BISPHOSPHATE_BINDING	105	0.342268	1.28802	0.0115364	0.087768	0.0734675	10495	tags=35%, list=18%, signal=29%	KCNJ1/AMER3/TTPA/SDCBP2/GSDMC/SCIN/VIL1/AMER2/SYT9/PLCZ1/PFN2/RLBP1/STXBP6/SYT7/CLVS2/TWF1/RAG2/EXOC1L/KCNQ1/SNAP91/SESTD1/FRMPD4/PLEK2/SNX14/MAPT/FZD7/PICALM/LAPTM4B/ANXA9/SNX3/MAPKAP1/KIF16B/WIPI1/SNX18/FCHO2/SDCBP/COMMD1
GOCC_CATENIN_COMPLEX	GOCC_CATENIN_COMPLEX	32	0.517266	1.57001	0.0115949	0.0881109	0.0737545	4099	tags=22%, list=7%, signal=20%	CTNNA2/CDH12/CDH17/CDH7/CDH20/CDH19/CDH1
GOBP_TISSUE_HOMEOSTASIS	GOBP_TISSUE_HOMEOSTASIS	260	0.271928	1.17428	0.0117023	0.0886999	0.0742476	6799	tags=17%, list=12%, signal=15%	CALCA/PIP/ALB/SH3GL2/PIGR/RDH12/RBP4/USH1G/OCLN/TJP3/CA2/ABCA4/NAPSA/WNK3/SIGLEC15/CNGB1/PTH1R/ACP5/ESRRB/GJB6/ADGRV1/MUC2/IHH/NXNL1/HOMER1/SOX9/SLC1A1/ILDR2/CUBN/MBP/CIB2/FH/SLC39A8/GPR137B/FSHB/ANGPT1/TUB/SLC12A2/IL20RA/PBLD/CLDN3/MKKS/FOXC1/AZGP1/ADGRF5
GOBP_HISTONE_UBIQUITINATION	GOBP_HISTONE_UBIQUITINATION	47	0.440408	1.45923	0.0117034	0.0886999	0.0742476	15272	tags=53%, list=27%, signal=39%	UBE2U/SKP1/PCGF5/CTR9/BMI1/UBE2N/DDB1/UBE2B/RAG1/TRIM37/RNF8/RNF2/RYBP/UBE2A/CDC73/USP22/RNF20/BCOR/TRIP12/UBE2E1/WAC/RNF40/PCGF6/DTX3L/OTUB1
GOBP_EPOXYGENASE_P450_PATHWAY	GOBP_EPOXYGENASE_P450_PATHWAY	20	0.602744	1.71038	0.011713	0.0886999	0.0742476	3350	tags=35%, list=6%, signal=33%	CYP2A6/CYP1A2/CYP2A7/CYP1A1/CYP2B6/CYP4A11/CYP4F2
GOBP_CATECHOL_CONTAINING_COMPOUND_METABOLIC_PROCESS	GOBP_CATECHOL_CONTAINING_COMPOUND_METABOLIC_PROCESS	52	0.436947	1.47927	0.0117339	0.0887175	0.0742623	6163	tags=27%, list=11%, signal=24%	PAH/TACR3/SNCB/INSM1/RTL4/PNMT/DAO/DDC/TH/RNF180/HAND2/HPRT1/GPR37/SNCAIP
GOBP_CELLULAR_RESPONSE_TO_DEXAMETHASONE_STIMULUS	GOBP_CELLULAR_RESPONSE_TO_DEXAMETHASONE_STIMULUS	29	0.535732	1.61362	0.0117424	0.0887175	0.0742623	7636	tags=31%, list=13%, signal=27%	CRH/ARG1/PCK1/PCK2/AQP1/EIF4E/FOXO1/FECH/AGTR2
GOBP_CHROMATIN_ORGANIZATION_INVOLVED_IN_REGULATION_OF_TRANSCRIPTION	GOBP_CHROMATIN_ORGANIZATION_INVOLVED_IN_REGULATION_OF_TRANSCRIPTION	153	0.316983	1.24603	0.0117838	0.0889281	0.0744386	5154	tags=14%, list=9%, signal=13%	H4C6/H1-5/H4C4/H4C2/H3C11/H3C2/H3C7/H4C1/H2AC21/H1-1/H1-4/H3C3/H4C13/H1-3/H4C3/H3C1/H2AC12/H2AC4/SERTAD1/H2AP/HMGA1/H2AW
GOBP_BRANCHING_INVOLVED_IN_LABYRINTHINE_LAYER_MORPHOGENESIS	GOBP_BRANCHING_INVOLVED_IN_LABYRINTHINE_LAYER_MORPHOGENESIS	12	0.721135	1.8083	0.0118478	0.0893077	0.0747564	9278	tags=58%, list=16%, signal=49%	GRHL2/ST14/FZD5/GCM1/RSPO3/SPINT1/SPINT2
GOBP_URATE_METABOLIC_PROCESS	GOBP_URATE_METABOLIC_PROCESS	14	0.688323	1.76881	0.0118912	0.0895324	0.0749445	9991	tags=79%, list=18%, signal=65%	UMOD/SLC22A12/URAD/G6PC/SLC16A9/SLC22A11/ABCG2/SLC17A3/PNP/SLC2A9/CARMIL1
GOBP_REGULATION_OF_POSTSYNAPTIC_SPECIALIZATION_ASSEMBLY	GOBP_REGULATION_OF_POSTSYNAPTIC_SPECIALIZATION_ASSEMBLY	11	0.734469	1.81828	0.0119869	0.0901488	0.0754604	1130	tags=18%, list=2%, signal=18%	LRRTM1/GRID2
GOBP_LYSINE_METABOLIC_PROCESS	GOBP_LYSINE_METABOLIC_PROCESS	13	0.706295	1.7921	0.0120728	0.090691	0.0759143	11270	tags=77%, list=20%, signal=62%	SLC25A21/CRYM/DLD/AASDHPPT/OGDH/DLST/ALDH7A1/GCDH/AADAT/HYKK
GOMF_METAL_CLUSTER_BINDING	GOMF_METAL_CLUSTER_BINDING	66	0.411509	1.4725	0.0121278	0.0909998	0.0761727	12874	tags=53%, list=23%, signal=41%	UQCRFS1/FDX1/ABAT/UQCRFS1P1/NDUFS1/ACO2/ETFDH/GLRX5/ISCA2/ACO1/CISD2/FXN/CISD1/SDHB/ISCA1/FECH/CIAPIN1/ISCU/ELP3/CISD3/NUBPL/AOX1/NUBP1/NDUFV1/NDUFS8/NFU1/IREB2/ERCC2/NFS1/NDUFS2/XDH/PPAT/GLRX3/GLRX2/NDUFS7
GOBP_MICROVILLUS_ORGANIZATION	GOBP_MICROVILLUS_ORGANIZATION	24	0.566724	1.60907	0.0121486	0.091052	0.0762165	13504	tags=75%, list=24%, signal=57%	GLDN/VIL1/RAP1GAP/PLS1/KLF5/CDHR2/EZR/ESPN/SLC9A3R1/TNIK/PODXL/CDHR5/USH1C/RAPGEF2/RAP2A/PTPN11/STK26/PLD1
GOBP_INOSITOL_PHOSPHATE_CATABOLIC_PROCESS	GOBP_INOSITOL_PHOSPHATE_CATABOLIC_PROCESS	18	0.634646	1.73459	0.0121746	0.0911428	0.0762925	14489	tags=72%, list=25%, signal=54%	INPP5J/IMPA2/BPNT1/BPNT2/IMPA1/INPP1/NTSR1/PTEN/MTMR2/INPP5A/OCRL/SYNJ1/NUDT3
GOCC_ADHERENS_JUNCTION	GOCC_ADHERENS_JUNCTION	172	0.310543	1.24096	0.0121971	0.0912069	0.0763461	12561	tags=34%, list=22%, signal=26%	CTNNA2/CDH12/CDH7/CDH20/MPP7/CDH19/WNK3/LIN7A/SHROOM3/STXBP6/CDH1/NECTIN3/EPB41L5/TSPAN33/POF1B/AJAP1/PDLIM4/ITGA6/CEACAM1/MPP5/RDX/ARHGAP24/PLPP3/PGM5/EPHA4/DSC2/LIN7C/FMN1/SSX2IP/TRPV4/PLEKHA7/BAIAP2/CDH3/CCDC85C/RAB10/FAT2/CNN3/CAMSAP3/PKP4/MAGI1/SPTBN4/SDCBP/EIF4G2/TMEM47/CTNNA1/DLG1/BMPR2/CTNNB1/FRS2/AJUBA/FERMT2/APC/DAG1/CDC42EP4/SHROOM2/TMOD3/CDH9/KLHL24
GOBP_RESPONSE_TO_LEUCINE	GOBP_RESPONSE_TO_LEUCINE	13	0.704252	1.78692	0.0122543	0.0915306	0.0766171	16559	tags=85%, list=29%, signal=60%	PDX1/PPARGC1A/RRAGD/SESN3/UBR1/SESN1/KLHL22/LARS1/UBR2/MTOR/SESN2
GOMF_DEMETHYLASE_ACTIVITY	GOMF_DEMETHYLASE_ACTIVITY	39	0.482041	1.52031	0.0123575	0.0921963	0.0771743	1179	tags=5%, list=2%, signal=5%	CYP1A2/CYP1A1
GOBP_THYROID_HORMONE_GENERATION	GOBP_THYROID_HORMONE_GENERATION	21	0.593324	1.68107	0.0124574	0.0928358	0.0777096	4721	tags=38%, list=8%, signal=35%	CGA/DIO1/CTSK/IYD/DUOX2/DUOXA2/DUOXA1/SLC16A10
GOBP_CELLULAR_RESPONSE_TO_ANTIBIOTIC	GOBP_CELLULAR_RESPONSE_TO_ANTIBIOTIC	13	0.702508	1.7825	0.0126174	0.0938372	0.0785478	119	tags=8%, list=0%, signal=8%	PLA2G4F
GOBP_HISTONE_MRNA_METABOLIC_PROCESS	GOBP_HISTONE_MRNA_METABOLIC_PROCESS	24	0.565562	1.60577	0.0126204	0.0938372	0.0785478	24714	tags=100%, list=43%, signal=57%	SNRPD3/CPSF2/SLBP/TENT4B/NCBP1/MTPAP/LSM1/NCBP2/EXOSC4/SSB/SNRPG/CPSF3/UPF1/XRN1/ZNF473/SNRPE/TENT2/SNRPB/LSM10/DCP2/LSM11/SNRPF/ATM/EXOSC10
GOBP_ACTIVATION_OF_ADENYLATE_CYCLASE_ACTIVITY	GOBP_ACTIVATION_OF_ADENYLATE_CYCLASE_ACTIVITY	39	0.480267	1.51472	0.01265	0.0939509	0.078643	1481	tags=10%, list=3%, signal=10%	CALCA/ADRB1/ADCYAP1/LHCGR
GOBP_ARACHIDONIC_ACID_METABOLIC_PROCESS	GOBP_ARACHIDONIC_ACID_METABOLIC_PROCESS	59	0.423137	1.48311	0.0127047	0.094084	0.0787545	8410	tags=32%, list=15%, signal=27%	CYP2A6/CYP1A2/CYP2A7/CYP1A1/CYP2B6/CYP4A22/CYP4A11/CYP4F2/PTGDS/PNPLA8/CBR1/CYP2C18/CYP2J2/EPHX2/PTGES2/FAAH2/PLA2G4A/ALOXE3/CYP2E1
GOBP_REGULATION_OF_ENDOPLASMIC_RETICULUM_UNFOLDED_PROTEIN_RESPONSE	GOBP_REGULATION_OF_ENDOPLASMIC_RETICULUM_UNFOLDED_PROTEIN_RESPONSE	29	0.532852	1.60495	0.0127083	0.094084	0.0787545	13595	tags=48%, list=24%, signal=37%	AGR2/DNAJB9/TMEM33/PPP1R15B/FICD/BOK/XBP1/HSPA5/WFS1/UFL1/PIK3R1/ATF6/DDRGK1/BAK1
GOCC_TERMINAL_BOUTON	GOCC_TERMINAL_BOUTON	51	0.455421	1.5315	0.012711	0.094084	0.0787545	3223	tags=18%, list=6%, signal=17%	CALCA/UNC13C/CALB1/ADCYAP1/SLC18A2/CCK/GRIK5/CNGB1/TH
GOBP_CYTOCHROME_COMPLEX_ASSEMBLY	GOBP_CYTOCHROME_COMPLEX_ASSEMBLY	36	0.491391	1.52273	0.0127517	0.0942407	0.0788856	15503	tags=69%, list=27%, signal=51%	UQCRFS1/SLC25A33/HCCS/PET117/COA3/TACO1/SMIM20/COX18/SURF1/SCO1/TIMM21/COX14/COX17/COX16/LYRM7/TTC19/UQCC2/COX10/COX15/COA6/COA5/UQCC3/FASTKD3/COA1/COA4
GOMF_NADPH_BINDING	GOMF_NADPH_BINDING	15	0.693359	1.78926	0.0127609	0.0942407	0.0788856	16994	tags=93%, list=30%, signal=65%	QDPR/CRYZ/GRHPR/HMGCR/DECR1/CBR4/DHFRP1/DHFR/LBR/KCNAB1/MTRR/SRD5A1/DUS2/TP53I3
GOBP_GLUTAMINE_FAMILY_AMINO_ACID_CATABOLIC_PROCESS	GOBP_GLUTAMINE_FAMILY_AMINO_ACID_CATABOLIC_PROCESS	26	0.563881	1.64357	0.0127919	0.0942574	0.0788996	8693	tags=58%, list=15%, signal=49%	ARG1/DAO/GOT1/NOS2/ARG2/ALDH4A1/DDAH1/ASRGL1/GOT2/PRODH/GLUD1/OAT/GLUD2/PRODH2/GLS
GOBP_RESPONSE_TO_PAIN	GOBP_RESPONSE_TO_PAIN	27	0.552378	1.6178	0.0127919	0.0942574	0.0788996	2704	tags=15%, list=5%, signal=14%	CALCA/CRH/SLC6A2/TAC1
GOBP_REGULATION_OF_FATTY_ACID_OXIDATION	GOBP_REGULATION_OF_FATTY_ACID_OXIDATION	33	0.521997	1.59698	0.0128102	0.0942868	0.0789242	9975	tags=45%, list=18%, signal=38%	FABP1/ABCB11/PPARGC1A/DGAT2/PLIN5/SOX9/FABP3/NR4A3/PPARG/CPT1A/ACADL/PRKAG2/MLYCD/PDK4/PPARA
GOBP_PEPTIDYL_THREONINE_DEPHOSPHORYLATION	GOBP_PEPTIDYL_THREONINE_DEPHOSPHORYLATION	22	0.587961	1.67339	0.0128866	0.0947424	0.0793055	9419	tags=41%, list=17%, signal=34%	PPM1E/DUSP8/PDP1/PPM1A/DUSP9/PPP2CA/PPM1B/PPP2CB/DUSP5
GOBP_REGULATION_OF_ACTIN_FILAMENT_LENGTH	GOBP_REGULATION_OF_ACTIN_FILAMENT_LENGTH	184	0.302984	1.26433	0.0129514	0.0951121	0.079615	12174	tags=34%, list=21%, signal=27%	CTNNA2/CAPZA3/PFN3/SCIN/VIL1/SPTBN2/CSF3/SLIT2/PFN2/NPHS1/DNAI3/IQGAP2/GMFB/CYFIP2/CFL2/PRKCE/F2RL1/TWF1/TMSB15A/RDX/CAPZA2/LIMA1/MKKS/EPS8/AP1AR/FMN1/ARHGAP40/PRKCD/WASL/NCKAP1/BIN1/ADD3/BAIAP2/ARHGAP18/DSTN/DMTN/JMY/PPP1R9A/ARFIP1/ARF6/CARMIL1/SEMA5A/SPTBN4/PIK3CA/TMSB4Y/ARFGEF1/MYADM/WASF3/SPTBN1/WDR1/GBA2/PDXP/DLG1/SPIRE1/SNX9/TMOD1/ACTR2/BAG4/BAIAP2L2/CDC42EP4/ABITRAM/WASHC5
GOBP_VESICLE_TARGETING	GOBP_VESICLE_TARGETING	95	0.36287	1.3491	0.0130317	0.0955947	0.080019	15737	tags=65%, list=28%, signal=47%	AP1M2/F5/CD59/SAR1B/AP1AR/CUL3/CHP1/CNIH1/PPP6C/FOLR1/SEC24A/TRAPPC6A/C17orf75/RAB1A/FAM91A1/NAPA/PSEN1/TRIP11/SEC23IP/TRAPPC4/STARD3NL/WIPI1/F8/TRAPPC6B/USO1/SCFD1/ARFGAP3/SEC24B/CLASP2/NSF/MCFD2/STX5/CTSC/RAB1B/PREB/TMED10/TBC1D23/GOSR1/TGFA/PPP6R3/KLHL12/SAR1A/NLGN1/WDR11/SEC16A/LMAN1/TFG/SNAP29/SEC24C/PEF1/TRAPPC10/TRAPPC3/SEC22B/TRAPPC9/SEC23A/TRAPPC2L/SEC31A/GOSR2/GORASP1/YKT6/TMED2/BET1
GOBP_REGULATION_OF_MITOCHONDRIAL_GENE_EXPRESSION	GOBP_REGULATION_OF_MITOCHONDRIAL_GENE_EXPRESSION	29	0.531269	1.60018	0.0131924	0.0966654	0.0809153	15657	tags=69%, list=28%, signal=50%	CHCHD10/TRMT10C/COA3/TACO1/LRPPRC/C1QBP/FASTKD2/TRUB2/MTRES1/MPV17L2/MALSU1/UQCC2/NGRN/PRKAA1/ALKBH1/METTL4/MRPS27/RMND1/FASTKD3/RPUSD4
GOBP_REGULATION_OF_CELL_MIGRATION_INVOLVED_IN_SPROUTING_ANGIOGENESIS	GOBP_REGULATION_OF_CELL_MIGRATION_INVOLVED_IN_SPROUTING_ANGIOGENESIS	66	0.408576	1.462	0.0132559	0.0970225	0.0812142	5985	tags=17%, list=11%, signal=15%	MIR15A/MIR188/MIR200C/FGFBP1/MIR494/MIR329-1/MIR221/KLF4/MIR361/MIR2355/MIR27B
GOMF_STEROID_DEHYDROGENASE_ACTIVITY	GOMF_STEROID_DEHYDROGENASE_ACTIVITY	34	0.517023	1.59833	0.013338	0.0975144	0.0816259	6760	tags=38%, list=12%, signal=34%	AKR1C4/HSD17B6/HSD11B2/AKR1D1/RDH16/AKR1C1/HSD17B13/HSD17B12/HSD17B8/SRD5A2/SDR42E1/HSD17B4/DHRS11
GOBP_TRAIL_ACTIVATED_APOPTOTIC_SIGNALING_PATHWAY	GOBP_TRAIL_ACTIVATED_APOPTOTIC_SIGNALING_PATHWAY	12	0.710707	1.78215	0.0134275	0.0980593	0.082082	12448	tags=67%, list=22%, signal=52%	MIR221/ZDHHC3/MIR222/TIMP3/TNFRSF10C/FADD/ATF3/PTEN
GOBP_PHAGOCYTOSIS_RECOGNITION	GOBP_PHAGOCYTOSIS_RECOGNITION	90	-0.496914	-1.39	0.0135062	0.0985248	0.0824717	12745	tags=49%, list=22%, signal=38%	IGHM/IGHV4-34/IGHV4-4/IGLC2/IGHA2/IGHG2/IGHV3-15/IGHG1/IGHV3-72/IGLC6/PTX3/IGHV3-16/MEGF10/IGHV3-23/IGHV4-61/IGHV3-11/IGHV5-10-1/IGHV7-4-1/IGHV3-33/IGHV3-21/IGHV3-35/IGHV3-43/IGHV7-81/IGHV1-18/IGHV2-5/LBP/IGHV5-51/IGHV3-64D/IGHV4-39/IGHV2-26/SFTPA1/IGHV1-69D/IGHV3-13/IGHG4/IGHV3-48/IGHV3-20/IGHV1-45/IGHV1OR15-1/CRP/IGHV4-59/IGHV4-28/IGHV2-70/IGHV1-69-2/IGHV3-73
GOMF_ENOYL_COA_HYDRATASE_ACTIVITY	GOMF_ENOYL_COA_HYDRATASE_ACTIVITY	10	0.775559	1.86054	0.0135353	0.0986271	0.0825573	8369	tags=90%, list=15%, signal=77%	AUH/EHHADH/ECHDC3/HADHB/HSD17B4/ECHDC1/HADHA/ECHS1/ECI1
GOMF_PHOSPHOLIPASE_C_ACTIVITY	GOMF_PHOSPHOLIPASE_C_ACTIVITY	28	0.561338	1.65315	0.0136124	0.0990787	0.0829353	6748	tags=32%, list=12%, signal=28%	CHRM1/PLCG2/CASR/PLCZ1/PLCL1/PLCL2/CHRM3/NOTUM/PLCH2
GOBP_L_GLUTAMATE_IMPORT_ACROSS_PLASMA_MEMBRANE	GOBP_L_GLUTAMATE_IMPORT_ACROSS_PLASMA_MEMBRANE	15	0.688808	1.77752	0.0137203	0.0997537	0.0835003	11774	tags=67%, list=21%, signal=53%	SLC1A6/GRM1/KCNJ10/SLC1A1/SLC1A2/CLN8/PSEN1/ARL6IP1/ARL6IP5/NTSR1
GOBP_MITOCHONDRIAL_TRANSCRIPTION	GOBP_MITOCHONDRIAL_TRANSCRIPTION	17	0.640696	1.71826	0.0137356	0.0997543	0.0835009	14140	tags=71%, list=25%, signal=53%	SLC25A33/CHCHD10/TFAM/TFB2M/MTRES1/PRKAA1/MRPL12/TWNK/MTERF1/METTL4/TEFM/TFB1M
GOBP_REGULATION_OF_PROTEIN_LOCALIZATION_TO_MEMBRANE	GOBP_REGULATION_OF_PROTEIN_LOCALIZATION_TO_MEMBRANE	192	0.293315	1.21902	0.0137722	0.0999093	0.0836306	12292	tags=39%, list=22%, signal=30%	DPP10/AGR2/VIL1/KCNJ11/SLC51B/GPC3/WNK3/STAC2/ANK3/PLS1/ZDHHC2/SLC1A1/NECAB2/PDZK1/LYPLA1/PRKCE/GPC4/SHISA6/EZR/ACSL3/RAB11FIP2/VAMP8/PPP2R5A/CHP1/STX3/LGALS3/ERBB2/PMAIP1/USP17L2/VTI1B/FZD9/SFN/CLTC/EPHA2/PRKCI/GPER1/FIS1/DMTN/RAB11A/PICALM/BCL2/ARF6/KIF5B/MIEF1/APPL1/PRNP/SLC5A3/PDPK1/LZTFL1/MAPK8/TMEM59/SPTBN1/SQSTM1/MIEF2/STX7/YWHAB/DLG1/MFF/TMBIM1/AP2B1/TFDP2/RHOQ/GBP1/ZDHHC5/TP73/YWHAE/RAP1…
GOBP_ESTABLISHMENT_OF_PIGMENT_GRANULE_LOCALIZATION	GOBP_ESTABLISHMENT_OF_PIGMENT_GRANULE_LOCALIZATION	24	0.560273	1.59075	0.0137998	0.0999991	0.0837058	14086	tags=62%, list=25%, signal=47%	GPR143/ARL6/MKKS/RAB17/MREG/CDH3/RAB1A/RAB11A/SHROOM2/MYO7A/BLOC1S6/BBS7/BLOC1S5/RAB27A/BBS2
GOBP_S_ADENOSYLMETHIONINE_METABOLIC_PROCESS	GOBP_S_ADENOSYLMETHIONINE_METABOLIC_PROCESS	15	0.688627	1.77705	0.0139122	0.100702	0.0842943	11530	tags=60%, list=20%, signal=48%	GNMT/AHCYL2/APIP/MAT2A/ENOPH1/MAT1A/MAT2B/BHMT2/AHCY
GOCC_CYTOPLASMIC_DYNEIN_COMPLEX	GOCC_CYTOPLASMIC_DYNEIN_COMPLEX	20	0.594301	1.68642	0.013944	0.100821	0.084394	14275	tags=65%, list=25%, signal=49%	DYNLL2/DYNLT3/SNX4/TOPORS/DYNC1LI1/DYNC2LI1/DYNLT1/DYNC1I2/DYNC2H1/DYNC2I2/DYNC1H1/DCTN4/DYNLRB1
GOMF_MAGNESIUM_DEPENDENT_PROTEIN_SERINE_THREONINE_PHOSPHATASE_ACTIVITY	GOMF_MAGNESIUM_DEPENDENT_PROTEIN_SERINE_THREONINE_PHOSPHATASE_ACTIVITY	11	0.726681	1.799	0.0139709	0.100904	0.0844632	8835	tags=45%, list=16%, signal=38%	PPM1E/PPM1H/PDP1/PDP2/PPM1L
GOMF_TESTOSTERONE_DEHYDROGENASE_NAD_P_ACTIVITY	GOMF_TESTOSTERONE_DEHYDROGENASE_NAD_P_ACTIVITY	10	0.77356	1.85574	0.0140335	0.101245	0.0847487	6078	tags=50%, list=11%, signal=45%	AKR1C4/HSD17B6/AKR1C1/HSD17B8/SRD5A2
GOBP_AMINO_ACID_IMPORT	GOBP_AMINO_ACID_IMPORT	48	0.470104	1.5428	0.0140759	0.101439	0.0849111	10617	tags=50%, list=19%, signal=41%	SLC7A8/SLC7A3/SLC1A6/GRM1/ACE2/CLTRN/SLC6A20/SLC6A13/SFXN2/KCNJ10/SLC1A1/SLC22A2/SLC1A2/SLC47A1/SLC22A4/SLC3A2/SLC43A1/CLN8/SLC43A2/PSEN1/SLC9A3R1/SFXN1/ARL6IP1/ARL6IP5
GOMF_ALDITOL_NADPPLUS_1_OXIDOREDUCTASE_ACTIVITY	GOMF_ALDITOL_NADPPLUS_1_OXIDOREDUCTASE_ACTIVITY	12	0.705625	1.76941	0.0141295	0.101714	0.0851413	3167	tags=33%, list=6%, signal=31%	ADH4/AKR1C4/AKR1D1/AKR1C1
GOBP_SEX_DIFFERENTIATION	GOBP_SEX_DIFFERENTIATION	261	0.26696	1.15628	0.0142555	0.102419	0.0857311	4887	tags=10%, list=9%, signal=9%	TSPY2/DMRT2/CYP17A1/FGF9/TSPY1/LHX9/BMPR1B/ADCYAP1/TSPY10/KIT/LHCGR/RBP4/EREG/SLIT2/SOX8/SFRP1/SIX4/CNTFR/LRP2/PGR/GAS2/BIK/LGR4/LHX1/PBX1/REN/SOX9
GOBP_NEGATIVE_REGULATION_OF_BLOOD_PRESSURE	GOBP_NEGATIVE_REGULATION_OF_BLOOD_PRESSURE	39	0.476401	1.50253	0.0142586	0.102419	0.0857311	821	tags=8%, list=1%, signal=8%	CALCA/CRH/ADRB1
GOMF_MEMBRANE_INSERTASE_ACTIVITY	GOMF_MEMBRANE_INSERTASE_ACTIVITY	12	0.704714	1.76713	0.0143051	0.102612	0.0858929	14617	tags=75%, list=26%, signal=56%	MMGT1/EMC3/COX18/EMC6/EMC8/EMC7/EMC4/EMC2/EMC10
GOBP_PROTEIN_TARGETING_TO_VACUOLE	GOBP_PROTEIN_TARGETING_TO_VACUOLE	40	0.481303	1.52893	0.0143238	0.102612	0.0858929	15686	tags=70%, list=28%, signal=51%	SORL1/HSPA8/NCOA4/VTI1B/PIK3R4/VPS13D/LAMP2/VPS37D/VPS37B/SORT1/CLU/RAB7A/VPS13A/AP3B1/AP3M1/ZFYVE16/GCC2/VTI1A/SCARB2/SNX16/AP3D1/VPS41/VPS37A/VPS37C/VPS13C/GOSR2/GNPTAB/M6PR
GOBP_LACTATION	GOBP_LACTATION	46	0.454752	1.49768	0.0143407	0.102612	0.0858929	7540	tags=22%, list=13%, signal=19%	SERPINC1/PRLR/NEURL1/ERBB4/MTCO2P12/GOT2/CDO1/SOCS2/CCND1/DDR1
GOBP_MITOCHONDRIAL_FUSION	GOBP_MITOCHONDRIAL_FUSION	28	0.558232	1.644	0.0143481	0.102612	0.0858929	15691	tags=71%, list=28%, signal=52%	AFG3L2/MUL1/OPA1/FIS1/CHCHD3/TFRC/STOML2/MFN2/OMA1/MIGA1/BNIP3/MFF/DNM1L/ADCK1/MFN1/ZDHHC6/BAK1/USP30/GDAP1/VAT1
GOBP_REGULATION_OF_CELLULAR_RESPONSE_TO_INSULIN_STIMULUS	GOBP_REGULATION_OF_CELLULAR_RESPONSE_TO_INSULIN_STIMULUS	66	0.405652	1.45154	0.014384	0.102757	0.0860139	8723	tags=21%, list=15%, signal=18%	AHSG/TRIM72/MIR103A1/GRB14/SORL1/ENPP1/ECHDC3/SLC27A4/PIP4K2C/PRKCD/LEP/OSBPL8/OPA1/ENHO
GOBP_ACTION_POTENTIAL	GOBP_ACTION_POTENTIAL	133	0.332794	1.30336	0.0144229	0.102922	0.0861526	8905	tags=30%, list=16%, signal=25%	KCNE5/MTNR1B/HCN2/KCNA1/SCN2B/CLDN19/GPD1L/TAC1/CHRNA4/MYH14/KCNE1B/NEDD4L/DSG2/NPS/KCNMB2/MIR208A/PTPN3/ANK3/SCN2A/ATP1A1/CACNA1D/KCNA2/DSP/ANK2/HCN4/FGF12/KCNC2/KCNQ1/USP53/DSC2/GNA11/SCN4A/SCN3A/FGF13/SCN5A/BIN1/CD36/CACNB2/GPER1/SLMAP
GOBP_POSITIVE_REGULATION_OF_MITOCHONDRIAL_TRANSLATION	GOBP_POSITIVE_REGULATION_OF_MITOCHONDRIAL_TRANSLATION	16	0.644925	1.7124	0.0145633	0.103811	0.0868967	16326	tags=81%, list=29%, signal=58%	TRMT10C/COA3/C1QBP/FASTKD2/TRUB2/MPV17L2/UQCC2/NGRN/MRPS27/RMND1/FASTKD3/RPUSD4/RCC1L
GOMF_ALPHA_TUBULIN_BINDING	GOMF_ALPHA_TUBULIN_BINDING	37	0.483261	1.5044	0.0146263	0.104147	0.0871779	8135	tags=24%, list=14%, signal=21%	SLC6A2/PACRG/C9orf24/PPARGC1A/FAM110C/HSPH1/BEX4/ARL8B/TRPV4
GOBP_RUFFLE_ASSEMBLY	GOBP_RUFFLE_ASSEMBLY	43	0.456906	1.51734	0.0146718	0.104345	0.0873438	7747	tags=21%, list=14%, signal=18%	STAP1/TACSTD2/PFN2/AIF1L/COBL/RDX/ARHGAP24/EPS8/USP17L2
GOMF_TRANSFERASE_ACTIVITY_TRANSFERRING_ALKYL_OR_ARYL_OTHER_THAN_METHYL_GROUPS	GOMF_TRANSFERASE_ACTIVITY_TRANSFERRING_ALKYL_OR_ARYL_OTHER_THAN_METHYL_GROUPS	56	0.432344	1.51018	0.0146891	0.104345	0.0873438	11913	tags=52%, list=21%, signal=41%	GSTA3/GSTA1/GSTO2/GSTA5/DTWD2/GSTZ1/PDSS2/GSTA2/COQ2/MAT2A/AGPS/PDSS1/CHM/MGST2/FDFT1/GSTO1/MAT1A/PTAR1/GSTP1/NUS1/GSTM3/LANCL1/TRMT12/SMS/PGGT1B/COX10/UBIAD1/GGPS1/HMBS
GOBP_SERINE_FAMILY_AMINO_ACID_BIOSYNTHETIC_PROCESS	GOBP_SERINE_FAMILY_AMINO_ACID_BIOSYNTHETIC_PROCESS	21	0.58535	1.65847	0.0147019	0.104345	0.0873438	15362	tags=81%, list=27%, signal=59%	AGXT/SEPHS2/AGXT2/PHGDH/PSPHP1/SHMT1/DHFRP1/PSPH/DHFR/DHFR2/SEPHS1/MTHFD1/SRR/CBSL/GGT1/CTH/SERINC5
GOMF_ADENYLATE_CYCLASE_BINDING	GOMF_ADENYLATE_CYCLASE_BINDING	12	0.702602	1.76183	0.0148316	0.105068	0.0879488	16828	tags=92%, list=30%, signal=65%	ADRB2/CALM2/AKAP6/ADCY5/CAP2/AKAP12/ADCY2/CALM1/RAF1/CALM3/AKAP5
GOBP_REGULATION_OF_SYSTEMIC_ARTERIAL_BLOOD_PRESSURE_BY_RENIN_ANGIOTENSIN	GOBP_REGULATION_OF_SYSTEMIC_ARTERIAL_BLOOD_PRESSURE_BY_RENIN_ANGIOTENSIN	22	0.578884	1.64756	0.0148358	0.105068	0.0879488	8811	tags=50%, list=15%, signal=42%	CES1/ACE2/SUCNR1/ATP6AP2/REN/CMA1/F2RL1/AGTR1/AGTR2/AGT/CTSG
GOBP_PROLINE_TRANSPORT	GOBP_PROLINE_TRANSPORT	10	0.770443	1.84827	0.0148639	0.105084	0.0879625	3802	tags=50%, list=7%, signal=47%	SLC6A15/SLC36A2/ACE2/CLTRN/SLC6A20
GOMF_RIBONUCLEOPROTEIN_COMPLEX_BINDING	GOMF_RIBONUCLEOPROTEIN_COMPLEX_BINDING	133	0.332	1.30024	0.0148701	0.105084	0.0879625	16977	tags=62%, list=30%, signal=43%	CPEB1/MAIP1/EIF1B/EIF5A2/CPEB3/ETF1/TACO1/CPEB4/SPCS1/SRP9/SRP54/DHX29/NAA15/SECISBP2L/YTHDF3/C1QBP/DDX3X/LETM1/UHMK1/EIF2S1/ABCE1/CPEB2/PRMT3/HSPA5/GUF1/EIF3K/OLA1/MALSU1/IFIH1/PHF6/DHX9/WDR12/DDX5/SRP19/ITCH/SECISBP2/EIF2A/FMR1/SBDS/NMD3/NOLC1/YTHDF1/SRPRA/PRMT5/SNRPD1/LETM2/UNG/EFL1/XPO5/MRPS27/PPP1CA/MTIF3/NEMF/CD2BP2/ERI1/LTN1/NPM1/EIF1/EIF4A3/MRRF/HNRNPU/TIMM50/SNRPB2/SRP72/EEFSEC/ERAL1/PIM…
GOBP_REGULATION_OF_ATP_METABOLIC_PROCESS	GOBP_REGULATION_OF_ATP_METABOLIC_PROCESS	117	0.328071	1.25249	0.0149189	0.105315	0.0881557	13361	tags=44%, list=23%, signal=33%	SLC4A1/PFKFB2/PPARGC1A/MTCO2P12/FBP1/COX7A1/ESRRB/ENTPD5/SLC25A33/GPD1/PDE12/SLC4A4/PPIF/COX7A2/PRKAA2/COX7A2L/PRKAG2/ATPSCKMT/PINK1/RANBP2/SLC25A12/FIS1/SEH1L/ATP7A/PSEN1/NUP35/DNAJC30/IGF1/PGAM1/PPARA/APP/HIF1A/PRKAG1/UQCC2/PRKAA1/SNCA/NUP58/DNAJC15/NUP160/DNM1L/NUP98/PRXL2C/VCP/NUP153/AK4/ZBTB20/ANTKMT/MLXIPL/PFKFB1/BEND3/SLC25A23
GOBP_REGULATION_OF_INTRINSIC_APOPTOTIC_SIGNALING_PATHWAY	GOBP_REGULATION_OF_INTRINSIC_APOPTOTIC_SIGNALING_PATHWAY	158	0.308095	1.20841	0.0151205	0.106624	0.089251	14251	tags=41%, list=25%, signal=30%	MIR15A/PDX1/VNN1/BCL2L10/MIR27B/PPIF/IL20RA/DNAJA1/MAPK8IP1/PTPMT1/SGMS1/PMAIP1/BOK/PINK1/BAG5/HERPUD1/UBQLN1/OPA1/UBB/NME5/DDX3X/NDUFS3/EIF2AK3/FIS1/CREB3/NFE2L2/SLC9A3R1/TMBIM6/XBP1/BCL2/PLAGL2/MARCHF7/ING2/MIR132/VDAC2/BCL2L2/CLU/TAF9/HIF1A/SELENOS/SIAH1/IVNS1ABP/URI1/LRRK2/HNRNPK/DNM1L/DDIT3/NACC2/USP47/SOD1/BDKRB2/SIRT1/NKX3-1/TRAP1/TAF9B/ARMC10/BCAP31/PRKRA/CYLD/TRIM32/CXCL12/BCLAF1/RNF183/…
GOCC_SPANNING_COMPONENT_OF_PLASMA_MEMBRANE	GOCC_SPANNING_COMPONENT_OF_PLASMA_MEMBRANE	13	0.694093	1.76114	0.015159	0.106781	0.0893823	5481	tags=38%, list=10%, signal=35%	SLC24A2/SLC15A2/AJAP1/SLC4A4/CDHR2
GOMF_CAMP_DEPENDENT_PROTEIN_KINASE_REGULATOR_ACTIVITY	GOMF_CAMP_DEPENDENT_PROTEIN_KINASE_REGULATOR_ACTIVITY	10	0.769987	1.84717	0.015196	0.106927	0.0895045	10599	tags=70%, list=19%, signal=57%	PKIA/PKIB/PRKAR1A/CXCL10/PRKAG2/PRKAR2A/PRKAG1
GOMF_PROTEIN_SERINE_THREONINE_KINASE_INHIBITOR_ACTIVITY	GOMF_PROTEIN_SERINE_THREONINE_KINASE_INHIBITOR_ACTIVITY	32	0.504206	1.53037	0.0152424	0.107138	0.0896817	28205	tags=100%, list=50%, signal=50%	PKIA/PKIB/PRKAR1A/CIT/PRKAG2/SFN/PRKAR2A/SPRY2/CDKN1A/KAT2B/SPRED2/MACROH2A1/CDKN2B/SPRED1/YWHAG/PRKAR1B/CDKN1C/CASP3/RPTOR/PKIG/INKA2/HEXIM1/CDKN1B/PRKAR2B/CDKN2D/HEXIM2/CDKN2C/INCA1/CIB1/HSPB1/INKA1/CDKN2A
GOBP_FOCAL_ADHESION_ASSEMBLY	GOBP_FOCAL_ADHESION_ASSEMBLY	85	0.3717	1.33779	0.0153104	0.107501	0.0899853	11926	tags=28%, list=21%, signal=22%	HRG/SFRP1/EPB41L5/SDC4/ARHGAP6/DUSP3/FMN1/PTPRJ/LIMCH1/DMTN/SLK/BCR/CAMSAP3/BCL2/TEK/PDPK1/RHOA/RHOD/CLASP2/FAM107A/THBS1/AJUBA/FERMT2/KDR
GOBP_POSITIVE_REGULATION_OF_AMINO_ACID_TRANSPORT	GOBP_POSITIVE_REGULATION_OF_AMINO_ACID_TRANSPORT	16	0.64232	1.70548	0.0153349	0.107501	0.0899856	7283	tags=44%, list=13%, signal=38%	SLC38A3/CCK/AVPR1A/ACE2/CLTRN/SLC12A2/STXBP1
GOBP_REGULATION_OF_PHAGOCYTOSIS	GOBP_REGULATION_OF_PHAGOCYTOSIS	92	0.359719	1.33176	0.0153556	0.107501	0.0899856	337	tags=4%, list=1%, signal=4%	STAP1/AHSG/APOA1/APOA2
GOBP_RESPONSE_TO_DEXAMETHASONE	GOBP_RESPONSE_TO_DEXAMETHASONE	38	0.469554	1.4667	0.0153597	0.107501	0.0899856	7636	tags=29%, list=13%, signal=25%	CRH/ARG1/CPS1/PCK1/PCK2/AQP1/EIF4E/FOXO1/FIBIN/FECH/AGTR2
GOBP_REGULATION_OF_CYTOPLASMIC_TRANSPORT	GOBP_REGULATION_OF_CYTOPLASMIC_TRANSPORT	27	0.544813	1.59565	0.015472	0.108172	0.090547	13072	tags=70%, list=23%, signal=54%	SORL1/EZR/RDX/RAB29/DENND10/RAB21/SNX3/ARFIP1/MAPK1/USP7/CHMP3/SNX12/MAP2/EIPR1/DAB2/MAP2K1/DNAJC13/LRRK2/MTMR2
GOBP_RENAL_TUBULE_DEVELOPMENT	GOBP_RENAL_TUBULE_DEVELOPMENT	90	0.369998	1.35653	0.0154952	0.108177	0.0905514	9775	tags=34%, list=17%, signal=29%	UMOD/CALB1/GPC3/SOX8/WNT11/IRX1/TACSTD2/KLHL3/SIX4/TFAP2B/NPNT/LGR4/LHX1/PBX1/SOX9/FGF1/ADAMTS16/MTSS1/SIX1/FMN1/AGTR2/BMP2/PROM1/SHH/SALL1/WNT9B/AGT/AQP11/CD24/BCL2/SMAD4
GOCC_PRERIBOSOME_LARGE_SUBUNIT_PRECURSOR	GOCC_PRERIBOSOME_LARGE_SUBUNIT_PRECURSOR	23	0.554906	1.58606	0.0155057	0.108177	0.0905514	25319	tags=100%, list=45%, signal=55%	NIP7/ZNF622/RRS1/WDR12/RRP15/EBNA1BP2/RPF1/MAK16/NSA2/FTSJ3/EIF6/FBXW9/PES1/MDN1/RRP1B/PPAN/WDR74/WDR37/LAS1L/NOC2L/MRTO4/RRP1/BOP1
GOBP_CELLULAR_RESPONSE_TO_OXYGEN_LEVELS	GOBP_CELLULAR_RESPONSE_TO_OXYGEN_LEVELS	225	0.282927	1.18137	0.015697	0.109395	0.0915708	13223	tags=35%, list=23%, signal=27%	BMP7/FABP1/CASR/PPARGC1A/HIGD1A/ATP6V1A/SFRP1/SLC2A4/MGARP/SCN2A/PCK1/CPEB1/ACAA2/UCN3/DDAH1/PRKCE/ENDOG/ANKRD1/PPARG/LPAR1/AQP1/ATP6V0D1/CPEB4/FOXO1/PMAIP1/ATP6V1G1/PINK1/CLCA1/PSME3/UBQLN1/OPA1/UBB/NFE2L2/ATP7A/TMBIM6/CPEB2/BCL2/PSMD14/CHCHD2/STOX1/NDNF/PGK1/HIF1A/PSMD10/RGCC/PSMD6/MPL/BNIP3/STUB1/HIPK2/PRKAA1/PSMC6/PSMD12/POU4F2/AJUBA/FAM162A/TMEM199/ATP6AP1/PSMD1/PSMB5/DNM1L/LMNA/PTEN/PSME4/A…
GOBP_DNA_TEMPLATED_TRANSCRIPTION_TERMINATION	GOBP_DNA_TEMPLATED_TRANSCRIPTION_TERMINATION	75	0.377426	1.376	0.0157168	0.109417	0.0915893	25790	tags=93%, list=45%, signal=51%	TAF1B/ZMPSTE24/SNRPD3/CPSF2/POLR1F/POLR2L/CLP1/POLR2K/SLBP/NUDT21/NCBP1/MNAT1/POLR1B/DHX9/GTF2H2/POLR3K/XRN2/PAPOLA/NCBP2/SETX/ERCC2/SSU72/CSTF2T/PRMT5/CSTF1/SNRPG/CPSF3/SCAF8/MTERF1/CSTF3/GTF2H5/CSTF2/POLR1A/CCNH/MED18/POLR2E/ZNF473/POLR1H/SNRPE/GTF2H3/GTF2H1/POLR1C/CDK7/SCAF4/WDR33/PCF11/TBP/FIP1L1/SNRPB/POLR2F/UBTF/POLR2A/LSM10/TTF1/CPSF7/CPSF4/TTF2/SMN1/LSM11/MAZ/TAF1A/SNRPF/TAF1D/SYMPK/POLR1…
GOBP_REGULATION_OF_CATION_CHANNEL_ACTIVITY	GOBP_REGULATION_OF_CATION_CHANNEL_ACTIVITY	175	0.300703	1.19668	0.015748	0.109518	0.0916737	6518	tags=17%, list=11%, signal=15%	LRRC52/LRRC38/CRH/KCNE5/MTNR1B/KCNA1/PLCG2/KCNJ11/PPARGC1A/CRHBP/DLG2/HAP1/KCNE1B/STAC2/GRIA2/TRDN/ANK3/ARC/AMIGO1/HOMER1/CCL2/NIPSNAP2/ANK2/SHISA6/FGF12/KCNC2/FGF14/GAL/SHISA8
GOBP_TRIGLYCERIDE_BIOSYNTHETIC_PROCESS	GOBP_TRIGLYCERIDE_BIOSYNTHETIC_PROCESS	41	0.490614	1.57147	0.0158078	0.109818	0.0919245	8872	tags=39%, list=16%, signal=33%	THRSP/GPAT3/ACSL1/DGAT2/GK/PCK1/PLIN5/RGN/LDLR/PCK2/FITM2/MOGAT2/ACSL4/GPAM/AGMO/MOGAT1
GOBP_REGULATION_OF_INTRACELLULAR_PROTEIN_TRANSPORT	GOBP_REGULATION_OF_INTRACELLULAR_PROTEIN_TRANSPORT	246	0.268652	1.12792	0.0158386	0.109915	0.0920057	14503	tags=38%, list=26%, signal=29%	CHRM1/TMEM30B/PKIA/SLC51B/ANK3/CDH1/SVIP/ZDHHC2/FERMT1/SLC1A1/PDZK1/FZD5/ANGPT1/SORL1/PPM1A/INSIG1/SAR1B/CHP1/PRKCD/ERBB2/RAB29/PDCD10/PMAIP1/LEP/AGTR2/USP17L2/PINK1/SFN/SHH/UBE2D3/CD36/RHOU/FIS1/DMTN/UHMK1/TMEM30A/GAS6/PSEN1/BCL2/MAPK1/KIF5B/YOD1/MIEF1/BAG3/XPO4/UBL5/PRNP/ERLEC1/MAPK8/SREBF2/GSK3B/MIEF2/YWHAB/PRKAA1/MFF/TFDP2/TXN/ZFAND1/LEPROT/UFM1/TP73/YWHAE/GCC2/IFI27/CDC42/BAG4/NUP58/ICE1/BMP…
GOBP_REGULATION_OF_IRE1_MEDIATED_UNFOLDED_PROTEIN_RESPONSE	GOBP_REGULATION_OF_IRE1_MEDIATED_UNFOLDED_PROTEIN_RESPONSE	14	0.678714	1.74411	0.0158852	0.110122	0.0921789	15451	tags=71%, list=27%, signal=52%	AGR2/DNAJB9/TMEM33/FICD/HSPA5/UFL1/DDRGK1/BAK1/BFAR/DAB2IP
GOBP_ICOSANOID_BIOSYNTHETIC_PROCESS	GOBP_ICOSANOID_BIOSYNTHETIC_PROCESS	56	0.429216	1.49926	0.015906	0.110149	0.092202	2499	tags=11%, list=4%, signal=10%	PLA2G4F/PLA2G3/GGT6/CYP4A22/CYP4A11/AVPR1A
GOBP_PEPTIDYL_THREONINE_MODIFICATION	GOBP_PEPTIDYL_THREONINE_MODIFICATION	126	0.32187	1.24954	0.016044	0.110903	0.0928329	13453	tags=40%, list=24%, signal=31%	MIR15A/UMOD/BMP7/EGF/GALNTL6/MIR103A1/WNK3/CADM4/TRPC5/GALNT11/PRKCD/CIT/PRKAG2/CAB39/HIPK3/DMTN/CALM2/NLK/GALNT3/BCL2/MAPK1/SPRY2/DCAF1/STOX1/PDPK1/APP/UBE2K/CDC42BPG/TGFBR2/MAPK8/GSK3B/HIPK2/ACVR1/PRKD1/CDC42BPB/TRIM6/MAP2K1/LRRK2/GALNT4/CALM1/TGFBR1/VRK1/DYRK3/GALNT16/TTC36/CSNK2B/LMTK2/PRKCA/CAMK2D/OXSR1/CDC42BPA
GOBP_REGULATION_OF_TRANSLATION_IN_RESPONSE_TO_STRESS	GOBP_REGULATION_OF_TRANSLATION_IN_RESPONSE_TO_STRESS	21	0.57991	1.64306	0.0160486	0.110903	0.0928329	16559	tags=71%, list=29%, signal=51%	PPP1R15B/DDX3X/DNAJC3/EIF2AK3/EIF2S1/RPS6KA3/IMPACT/PPP1CA/EIF2AK2/NPM1/EIF2AK1/EIF4G1/TMED2/NCK1/SESN2
GOBP_POSITIVE_REGULATION_OF_STEROID_BIOSYNTHETIC_PROCESS	GOBP_POSITIVE_REGULATION_OF_STEROID_BIOSYNTHETIC_PROCESS	19	0.598728	1.66647	0.0160977	0.111125	0.0930188	5897	tags=26%, list=10%, signal=24%	CGA/CYP7A1/PPARGC1A/FSHB/FGF1
GOBP_CAMP_MEDIATED_SIGNALING	GOBP_CAMP_MEDIATED_SIGNALING	62	0.413321	1.4477	0.0161233	0.111184	0.0930686	9878	tags=35%, list=17%, signal=29%	CRH/EPHA5/ADCYAP1/DEFB1/PDE3B/GPR61/SOX9/RNF157/LPAR1/GAL/PRKAR1A/NPY2R/ADCY1/NDUFS4/PCLO/AKAP6/CAP2/UBE2B/PRKAR2A/RIMS2/RAPGEF4/PDE7B
GOBP_RESPONSE_TO_GLUCAGON	GOBP_RESPONSE_TO_GLUCAGON	37	0.473658	1.4745	0.0162365	0.111848	0.0936239	9628	tags=38%, list=17%, signal=31%	GCGR/ARG1/CPS1/PCK1/QDPR/CDO1/CRY1/PRKAR1A/CYC1/ADCY1/PRKACB/ADCY5/PRKAR2A/ADCY9
GOBP_REGULATION_OF_TUBE_SIZE	GOBP_REGULATION_OF_TUBE_SIZE	126	0.321228	1.24705	0.0164426	0.113149	0.094713	9426	tags=26%, list=17%, signal=22%	CALCA/KNG1/ADRB1/CPS1/CASR/UTS2R/SLC6A4/AVPR1A/ACE2/KCNMB2/HRH2/KCNMA1/SMTNL2/F2RL1/AGTR1/EDNRB/CHRM3/MKKS/FOXC1/SCPEP1/GCLC/AVPR1B/LEP/AGTR2/ZDHHC21/ADRB2/PIK3C2A/WNT9B/AGT/GPER1/GCLM/ATG5/ADRA1D
GOBP_POSITIVE_REGULATION_OF_INSULIN_SECRETION_INVOLVED_IN_CELLULAR_RESPONSE_TO_GLUCOSE_STIMULUS	GOBP_POSITIVE_REGULATION_OF_INSULIN_SECRETION_INVOLVED_IN_CELLULAR_RESPONSE_TO_GLUCOSE_STIMULUS	35	0.484841	1.51211	0.0165616	0.113729	0.0951982	4125	tags=17%, list=7%, signal=16%	CFTR/CRH/OXCT1/PDX1/CLTRN/VSNL1
GOCC_ENDOSOME_LUMEN	GOCC_ENDOSOME_LUMEN	35	0.485598	1.51447	0.0165616	0.113729	0.0951982	5251	tags=26%, list=9%, signal=23%	SFTPB/PRLR/CTSK/SFTPC/NAPSA/IL12B/LRP2/LGMN/PDLIM4
GOBP_CARNITINE_SHUTTLE	GOBP_CARNITINE_SHUTTLE	11	0.714738	1.76943	0.0166162	0.113984	0.0954123	7858	tags=55%, list=14%, signal=47%	THRSP/CPT1A/PRKAA2/CPT2/PRKAG2/SLC25A20
GOBP_POSITIVE_REGULATION_BY_SYMBIONT_OF_ENTRY_INTO_HOST	GOBP_POSITIVE_REGULATION_BY_SYMBIONT_OF_ENTRY_INTO_HOST	11	0.714117	1.7679	0.0167815	0.11494	0.0962123	1224	tags=18%, list=2%, signal=18%	TMPRSS2/TMPRSS4
GOBP_LIPID_PHOSPHORYLATION	GOBP_LIPID_PHOSPHORYLATION	72	0.3889	1.42423	0.0168007	0.11494	0.0962123	13001	tags=42%, list=23%, signal=32%	PIK3C2G/DGKI/CERKL/P3R3URF/PIP5K1B/IMPA2/CISH/SOCS4/IP6K3/SOCS2/PIP4K2C/FAM126B/SOCS6/PIK3C2A/TTC7B/BPNT1/PI4K2B/BPNT2/IMPA1/PIK3CA/PIK3R3/INPP1/EFR3B/PIK3CB/PIK3R1/PIKFYVE/IP6K1/PI4K2A/EFR3A/PIK3C3
GOBP_NUCLEOSIDE_PHOSPHATE_CATABOLIC_PROCESS	GOBP_NUCLEOSIDE_PHOSPHATE_CATABOLIC_PROCESS	83	0.361028	1.30998	0.0168081	0.11494	0.0962123	14698	tags=52%, list=26%, signal=38%	GDA/ACAT1/ENTPD5/NUDT12/NUDT4B/ENTPD8/HPRT1/FITM2/ENPP1/NUDT9/DCTPP1/UPP1/UPB1/PNP/NUDT7/NUDT4/MLYCD/AMPD3/SMPDL3A/ENTPD2/DNPH1/NT5C1B/PDE7B/PDE4D/HINT1/DUT/NUDT15/ACOT7/XDH/PDE1A/DERA/VCP/UNG/ENTPD3/NT5C2/DPYS/NUDT16/PDE2A/ENTPD7/NT5M/NUDT3/NT5E/UPP2
GOBP_CELL_KILLING	GOBP_CELL_KILLING	175	0.298286	1.18706	0.0168341	0.114998	0.0962606	3196	tags=9%, list=6%, signal=9%	HRG/CFHR5/CFHR2/STAP1/DEFB132/ARG1/CR1L/CFHR1/DEFA3/REG3G/SLC22A13/CXCL6/CD5L/IL12B/MUC7/DNASE1
GOBP_MODULATION_BY_HOST_OF_VIRAL_GENOME_REPLICATION	GOBP_MODULATION_BY_HOST_OF_VIRAL_GENOME_REPLICATION	18	0.623712	1.7047	0.0168807	0.115196	0.0964266	15020	tags=67%, list=26%, signal=49%	MIR221/MIR222/HSPA8/FBXL2/VAPA/PHB/FMR1/IFI27/CCL8/STOM/YTHDC2/CCNK
GOBP_POSITIVE_REGULATION_OF_EXOCYTOSIS	GOBP_POSITIVE_REGULATION_OF_EXOCYTOSIS	84	0.376112	1.3504	0.016914	0.115304	0.0965168	10996	tags=38%, list=19%, signal=31%	CFTR/SYT10/PLA2G3/CD177/SYT9/CLTRN/VSNL1/EXPH5/SYT7/F2RL1/SDC4/SDC1/RAB9A/VAMP8/SNX4/CADPS2/STXBP1/SCAMP5/TSG101/CADPS/AP1G1/PDCD6IP/CACNB2/STAM/VPS4B/RAB5A/LAMP1/GATA2/SDCBP/RAB7A/CLASP2/SNCA
GOBP_ONE_CARBON_COMPOUND_TRANSPORT	GOBP_ONE_CARBON_COMPOUND_TRANSPORT	12	0.698335	1.75113	0.0169379	0.115346	0.0965524	2632	tags=33%, list=5%, signal=32%	AQP6/AQP5/SLC14A2/CA2
GOBP_NEGATIVE_REGULATION_OF_PEPTIDYL_THREONINE_PHOSPHORYLATION	GOBP_NEGATIVE_REGULATION_OF_PEPTIDYL_THREONINE_PHOSPHORYLATION	21	0.57505	1.62929	0.0171709	0.116812	0.0977791	4182	tags=14%, list=7%, signal=13%	MIR15A/MIR103A1/CADM4
GOBP_REGULATION_OF_RUFFLE_ASSEMBLY	GOBP_REGULATION_OF_RUFFLE_ASSEMBLY	29	0.521518	1.57081	0.0173073	0.117514	0.0983672	7747	tags=28%, list=14%, signal=24%	STAP1/TACSTD2/PFN2/COBL/RDX/ARHGAP24/EPS8/USP17L2
GOBP_NEGATIVE_REGULATION_OF_OSSIFICATION	GOBP_NEGATIVE_REGULATION_OF_OSSIFICATION	37	0.471244	1.46699	0.01731	0.117514	0.0983672	5826	tags=24%, list=10%, signal=22%	CALCA/AHSG/SOST/GFRA4/SFRP1/MIR208A/SOX9/DKK1/ENPP1
GOBP_NEGATIVE_REGULATION_OF_SMALL_MOLECULE_METABOLIC_PROCESS	GOBP_NEGATIVE_REGULATION_OF_SMALL_MOLECULE_METABOLIC_PROCESS	99	0.344265	1.29821	0.017492	0.118627	0.0992986	6527	tags=17%, list=11%, signal=15%	APOC3/SLC4A1/CYP7A1/MIR33A/PPARGC1A/SLC22A13/FBP1/DGAT2/FGF19/PLIN5/ACMSD/SOX9/CEACAM1/INSIG1/CRY1/SLC27A4/ACADL
GOBP_CELLULAR_CARBOHYDRATE_CATABOLIC_PROCESS	GOBP_CELLULAR_CARBOHYDRATE_CATABOLIC_PROCESS	47	0.425721	1.41057	0.0175168	0.118662	0.0993277	13954	tags=51%, list=25%, signal=39%	TREH/G6PC/MIOX/GBA3/GK/SORD/PHKA1/ABHD10/AGL/MGAM/IDNK/PPP1CB/PHKB/GPD2/PGAM1/GK5/PYGB/PGM2/CALM1/PPP1R3D/RB1CC1/SCARB2/TKFC/PPP1CA
GOBP_ENDOSOMAL_TRANSPORT	GOBP_ENDOSOMAL_TRANSPORT	241	0.278716	1.16202	0.0175333	0.118662	0.0993277	14662	tags=50%, list=26%, signal=37%	PLA2G3/NDRG4/TBC1D14/MYO5B/RAB6D/ZDHHC2/AP5M1/SORL1/RAB11FIP4/RAB9A/SNX4/CHMP2B/AP5B1/DENND1B/CHMP5/PLEKHJ1/RAB17/RAB29/ARL8B/TSG101/VTI1B/TMEM50B/STAM2/RAB14/CLTC/DENND10/UBB/ARL1/VPS26A/RAB11A/PICALM/ZFYVE9/LAMTOR1/LAPTM4B/RAB10/PREPL/VPS37D/STAM/SNX3/ARFIP1/VTA1/SNX2/RHOBTB3/VPS37B/ARF6/HEATR5A/CHMP1B/SNX31/VPS4B/RGP1/SNX18/SORT1/USP7/BLOC1S2/VPS35/RAB7A/SRL/VPS36/CHMP3/CHMP4C/SNX12/SQSTM1/SPA…
GOBP_LEARNING	GOBP_LEARNING	130	0.318923	1.23085	0.017572	0.118802	0.0994446	3959	tags=11%, list=7%, signal=10%	CRH/PAK5/SLC24A2/KIT/CCK/BCHE/PPP1R1B/NDRG4/CNTNAP2/TAC1/PAK6/TH/NPS/ARC
GOBP_BIOMINERALIZATION	GOBP_BIOMINERALIZATION	160	0.317615	1.24539	0.0176073	0.118917	0.0995416	5037	tags=14%, list=9%, signal=13%	KLK4/AHSG/ODAM/BMPR1B/BMP7/AMTN/CER1/AMELX/ENAM/GPC3/WNT11/WDR72/TSPEAR/PTH1R/KL/ADGRV1/TMEM38B/MIR208A/LGR4/SGMS2/SOX9/DMP1/KLF10
GOBP_NEGATIVE_REGULATION_OF_ENDOPLASMIC_RETICULUM_STRESS_INDUCED_INTRINSIC_APOPTOTIC_SIGNALING_PATHWAY	GOBP_NEGATIVE_REGULATION_OF_ENDOPLASMIC_RETICULUM_STRESS_INDUCED_INTRINSIC_APOPTOTIC_SIGNALING_PATHWAY	18	0.622326	1.70091	0.0176991	0.119414	0.0999577	12096	tags=44%, list=21%, signal=35%	PDX1/HERPUD1/OPA1/CREB3/TMBIM6/XBP1/SELENOS/LRRK2
GOBP_CHAPERONE_MEDIATED_PROTEIN_TRANSPORT	GOBP_CHAPERONE_MEDIATED_PROTEIN_TRANSPORT	11	0.710146	1.75806	0.0177784	0.119826	0.100302	12455	tags=91%, list=22%, signal=71%	HSPA8/TIMM8A/TIMM8B/TIMM10/BAG3/PEX19/CLU/TOR1A/TIMM13/TIMM9
GOCC_GOLGI_ASSOCIATED_VESICLE	GOCC_GOLGI_ASSOCIATED_VESICLE	92	0.355036	1.31443	0.0180261	0.121371	0.101595	13938	tags=41%, list=25%, signal=31%	CFTR/TYR/SLC2A4/CNGB1/STEAP2/NCALD/TMED7/AFTPH/ITM2B/RAB14/MAP6/AP1G1/CLTC/ZDHHC13/SPPL2A/COPB1/ATP7A/SORT1/CLTA/APP/SCFD1/RHOQ/AP1S1/IGF2R/COPG2/TMEM199/ARCN1/LRRK2/TMED10/SPG21/BNIP1/DIPK2A/STK26/TGOLN2/OCRL/PACSIN1/COPB2/PI4KA
GOBP_RRNA_METABOLIC_PROCESS	GOBP_RRNA_METABOLIC_PROCESS	236	0.279586	1.15781	0.0180832	0.12163	0.101812	32405	tags=97%, list=57%, signal=42%	C1D/EXOSC7/SRFBP1/DDX10/UTP4/UTP3/TRMT61B/MRPL1/TFB2M/MAPT/DDX21/UTP15/UTP20/RRS1/WDR43/METTL15/RIOK3/TENT4B/UTP18/DDX52/IMP3/MTREX/WDR12/BMT2/XRN2/RRP15/MPHOSPH6/SHQ1/RPUSD2/DDX18/NAF1/NOL11/WDR36/RRP36/DCAF13/SBDS/ERCC2/EXOSC4/FRG1/NOLC1/RRP12/THUMPD1/BYSL/PELO/NOP10/DIS3/NIFK/RPP25/FDXACB1/NOP9/EBNA1BP2/SENP3/METTL5/KAT2B/RPF1/POP4/RPL7L1/LSM6/MAK16/EXOSC3/NUDT16/NOL6/GTPBP4/EXOSC6/MRM3/GTF2H5…
GOBP_REGULATION_OF_SODIUM_ION_TRANSMEMBRANE_TRANSPORTER_ACTIVITY	GOBP_REGULATION_OF_SODIUM_ION_TRANSMEMBRANE_TRANSPORTER_ACTIVITY	54	0.427821	1.46654	0.0181582	0.12201	0.10213	7142	tags=28%, list=13%, signal=24%	FXYD4/SCN2B/PCSK9/GPD1L/WNK3/NEDD4L/PTPN3/ANK3/HECW1/PRKCE/FGF12/TESC/FGF14/FXYD6/CHP1
GOMF_ANION_CHANNEL_ACTIVITY	GOMF_ANION_CHANNEL_ACTIVITY	86	0.36306	1.31677	0.0182891	0.122764	0.102761	1042	tags=7%, list=2%, signal=7%	BSND/SLC26A7/CLCNKB/CFTR/CLCNKA/ANO5
GOBP_TELOMERE_CAPPING	GOBP_TELOMERE_CAPPING	55	0.422745	1.46225	0.0183353	0.122948	0.102915	2922	tags=11%, list=5%, signal=10%	H4C6/H4C4/H4C2/H4C1/H4C13/H4C3
GOMF_HSP70_PROTEIN_BINDING	GOMF_HSP70_PROTEIN_BINDING	39	0.466973	1.47279	0.0183707	0.123059	0.103009	10996	tags=38%, list=19%, signal=31%	PACRG/CYP1A1/DNAJB9/GPR37/FGF1/DNAJA1/DNAJB14/FICD/DNAJB1/CYP2E1/ST13/PPID/DNAJA3/STUB1/SNCA
GOBP_MULTIVESICULAR_BODY_ORGANIZATION	GOBP_MULTIVESICULAR_BODY_ORGANIZATION	31	0.51997	1.57118	0.0185176	0.123917	0.103726	14996	tags=68%, list=26%, signal=50%	CHMP2B/CHMP5/TSG101/STAM2/PDCD6IP/RAB11A/VPS37D/STAM/VTA1/VPS37B/CHMP1B/VPS4B/VPS36/CHMP3/CHMP4C/VPS25/CHMP6/IST1/RAB27A/VPS37A/VPS37C
GOBP_NUCLEAR_TRANSCRIBED_MRNA_CATABOLIC_PROCESS_EXONUCLEOLYTIC	GOBP_NUCLEAR_TRANSCRIBED_MRNA_CATABOLIC_PROCESS_EXONUCLEOLYTIC	35	0.481934	1.50304	0.018648	0.124535	0.104244	29472	tags=100%, list=52%, signal=48%	DCPS/EXOSC7/WDR61/LSM3/LSM1/EXOSC4/HBS1L/LSM4/DIS3/CNOT6/CNOT7/LSM6/EXOSC3/EXOSC6/TTC37/DDX6/PATL1/CNOT8/LSM2/LSM5/DCP1A/NT5C3B/EXOSC9/EXOSC2/EDC3/POLR2G/DCP2/DIS3L2/EDC4/EXOSC1/SKIV2L/EXOSC8/DCP1B/LSM7/EXOSC5
GOCC_ORGANELLE_MEMBRANE_CONTACT_SITE	GOCC_ORGANELLE_MEMBRANE_CONTACT_SITE	39	0.463036	1.46037	0.0186646	0.124535	0.104244	15152	tags=62%, list=27%, signal=45%	GRAMD1C/BCL2L10/SACM1L/TMX2/PDZD8/OSBPL1A/ACSL4/PIK3R4/SERAC1/RMDN3/RAB32/ATG5/STARD3NL/TMEM41B/CANX/ZFYVE1/SARAF/MICOS13/STX17/BCAP31/TOMM20/RAB38/MOSPD2/ESYT3
GOBP_REGULATION_OF_KERATINOCYTE_DIFFERENTIATION	GOBP_REGULATION_OF_KERATINOCYTE_DIFFERENTIATION	42	0.459277	1.49328	0.018667	0.124535	0.104244	6894	tags=29%, list=12%, signal=25%	CTSK/GRHL2/REG3G/OVOL2/CTSV/IL20/VDR/SGPP1/GRHL1/REG3A/FOXC1/ETV4
GOBP_REGULATION_OF_DEFENSE_RESPONSE_TO_BACTERIUM	GOBP_REGULATION_OF_DEFENSE_RESPONSE_TO_BACTERIUM	17	0.628266	1.68492	0.0188228	0.125349	0.104925	5980	tags=29%, list=11%, signal=26%	PGC/KLK7/ARG2/F2RL1/KLK5
GOCC_COPII_COATED_ER_TO_GOLGI_TRANSPORT_VESICLE	GOCC_COPII_COATED_ER_TO_GOLGI_TRANSPORT_VESICLE	92	0.354288	1.31165	0.0188272	0.125349	0.104925	15647	tags=61%, list=28%, signal=44%	TMED6/PCSK9/F5/IER3IP1/TMED7/TMED5/CD59/SAR1B/SEC23B/CNIH1/HLA-G/FOLR1/VTI1B/SEC24A/B2M/YIPF6/SEC23IP/HLA-DQA2/F8/USO1/YIF1A/APP/VMA21/SREBF2/SEC24B/TMED1/MCFD2/STX5/CTSC/YIPF5/VTI1A/TMED10/HLA-H/STX17/HLA-C/TGFA/HLA-B/ERGIC2/KLHL12/SCAP/SAR1A/CNIH4/SEC16A/LMAN1/LMAN2L/HLA-DRB5/TMED4/SEC24C/PEF1/SEC22B/SEC23A/SEC31A/GOSR2/TEX261/TMED2/ECPAS
GOBP_ER_OVERLOAD_RESPONSE	GOBP_ER_OVERLOAD_RESPONSE	12	0.690785	1.7322	0.0188738	0.125532	0.105078	12265	tags=75%, list=22%, signal=59%	PPP1R15B/CCDC47/EIF2AK3/HSPA5/WFS1/SELENOS/GSK3B/TMCO1/DDIT3
GOMF_STEROL_TRANSFER_ACTIVITY	GOMF_STEROL_TRANSFER_ACTIVITY	22	0.570038	1.62238	0.0189507	0.12576	0.10527	4852	tags=18%, list=9%, signal=17%	APOA1/APOA2/GRAMD1C/ABCG8
GOBP_REGULATION_OF_NEURON_MIGRATION	GOBP_REGULATION_OF_NEURON_MIGRATION	39	0.462399	1.45837	0.0189586	0.12576	0.10527	2317	tags=10%, list=4%, signal=10%	NKX6-1/CTNNA2/SCRT1/ERBB4
GOBP_MITOCHONDRIAL_FISSION	GOBP_MITOCHONDRIAL_FISSION	42	0.458495	1.49074	0.0189657	0.12576	0.10527	12205	tags=55%, list=21%, signal=43%	PPARGC1A/MUL1/MTFR1/TMEM135/MARCHF5/SLC25A46/PINK1/OPA1/MAPT/FIS1/MIEF1/VPS35/BNIP3/MIEF2/AP3B1/COX10/MFF/MCU/SPIRE1/KDR/DNM1/LRRK2/DNM1L
GOCC_M_BAND	GOCC_M_BAND	24	0.54081	1.53549	0.0189894	0.12579	0.105295	7877	tags=29%, list=14%, signal=25%	TRIM63/LRRC39/ANK2/SMTNL2/CMYA5/PPP2R5A/KCTD6
GOCC_LAMELLAR_BODY	GOCC_LAMELLAR_BODY	17	0.62731	1.68236	0.0190263	0.125908	0.105393	5980	tags=41%, list=11%, signal=37%	SFTPB/KLK7/SFTPC/SFTA3/NAPSA/SMPD1/KLK5
GOCC_PARALLEL_FIBER_TO_PURKINJE_CELL_SYNAPSE	GOCC_PARALLEL_FIBER_TO_PURKINJE_CELL_SYNAPSE	12	0.68997	1.73015	0.0192265	0.127104	0.106395	2021	tags=33%, list=4%, signal=32%	UNC13C/GRID2/CNTN6/SPTBN2
GOCC_EXTRINSIC_COMPONENT_OF_PLASMA_MEMBRANE	GOCC_EXTRINSIC_COMPONENT_OF_PLASMA_MEMBRANE	169	0.291784	1.16268	0.019253	0.127151	0.106434	4547	tags=10%, list=8%, signal=9%	CTNNA2/MYZAP/CDH12/RGS8/CDH17/EPN3/PLG/CDH7/CDH20/PCSK9/CDH19/STAC2/ST14/WNT2/CDH1/GNG13/KCNIP1
GOMF_SOLUTE_PROTON_SYMPORTER_ACTIVITY	GOMF_SOLUTE_PROTON_SYMPORTER_ACTIVITY	20	0.580423	1.64704	0.0192984	0.127323	0.106578	9437	tags=50%, list=17%, signal=42%	SLC36A2/SLC45A2/SLC15A2/SLC39A8/SLC2A13/MFSD3/SLC25A3/SLC17A5/SLC33A1/SLC2A9
GOBP_FORMATION_OF_CYTOPLASMIC_TRANSLATION_INITIATION_COMPLEX	GOBP_FORMATION_OF_CYTOPLASMIC_TRANSLATION_INITIATION_COMPLEX	16	0.628173	1.66792	0.0193856	0.127678	0.106875	18054	tags=81%, list=32%, signal=55%	EIF5/EIF3CL/EIF3K/EIF3M/EIF3J/EIF3A/EIF3L/EIF2S2/EIF3F/EIF3C/EIF3H/EIF3E/EIF3D
GOMF_CYSTEINE_TYPE_ENDOPEPTIDASE_INHIBITOR_ACTIVITY	GOMF_CYSTEINE_TYPE_ENDOPEPTIDASE_INHIBITOR_ACTIVITY	56	0.425394	1.48591	0.0193912	0.127678	0.106875	2116	tags=12%, list=4%, signal=12%	HRG/KNG1/AHSG/CST9LP1/CST5/VIL1/CST6
GOBP_MATURATION_OF_5_8S_RRNA	GOBP_MATURATION_OF_5_8S_RRNA	35	0.480315	1.49799	0.0194305	0.127808	0.106984	29564	tags=100%, list=52%, signal=48%	C1D/EXOSC7/UTP20/RRS1/MTREX/WDR12/RRP15/MPHOSPH6/EXOSC4/NOP9/RPF1/MAK16/EXOSC3/RPP40/ERI1/NSA2/FTSJ3/ERI2/EIF6/NOP14/ERI3/PRKDC/ABT1/RCL1/RPS21/PES1/URB1/EXOSC9/EXOSC2/LAS1L/NOL9/EXOSC10/BOP1/EXOSC8/KRI1
GOBP_NUCLEOTIDE_SUGAR_METABOLIC_PROCESS	GOBP_NUCLEOTIDE_SUGAR_METABOLIC_PROCESS	37	0.467592	1.45562	0.0194569	0.127854	0.107022	11846	tags=46%, list=21%, signal=36%	B4GALNT2/GNPNAT1/RENBP/GFPT1/GNPDA1/UAP1/UXS1/PARG/GNE/SLC35A3/GNPDA2/SLC35D1/UGP2/GMDS/TGDS/EXTL2/CSGALNACT1
GOBP_PHOSPHATE_ION_TRANSMEMBRANE_TRANSPORT	GOBP_PHOSPHATE_ION_TRANSMEMBRANE_TRANSPORT	15	0.668507	1.72513	0.019477	0.127858	0.107026	14008	tags=60%, list=25%, signal=45%	SLC34A1/SLC25A3/SLC25A11/SLC25A30/SLC20A2/XPR1/SLC25A10/SLC37A4/SLC20A1
GOMF_TRANSMEMBRANE_RECEPTOR_PROTEIN_TYROSINE_KINASE_ADAPTOR_ACTIVITY	GOMF_TRANSMEMBRANE_RECEPTOR_PROTEIN_TYROSINE_KINASE_ADAPTOR_ACTIVITY	13	0.681332	1.72876	0.0195214	0.128021	0.107162	211	tags=8%, list=0%, signal=8%	STAP1
GOBP_KILLING_OF_CELLS_IN_OTHER_ORGANISM_INVOLVED_IN_SYMBIOTIC_INTERACTION	GOBP_KILLING_OF_CELLS_IN_OTHER_ORGANISM_INVOLVED_IN_SYMBIOTIC_INTERACTION	26	0.545796	1.59086	0.019614	0.128369	0.107453	2814	tags=27%, list=5%, signal=26%	HRG/CFHR5/CFHR2/ARG1/CFHR1/REG3G/CXCL6
GOMF_CATION_CATION_ANTIPORTER_ACTIVITY	GOMF_CATION_CATION_ANTIPORTER_ACTIVITY	26	0.545381	1.58964	0.019614	0.128369	0.107453	564	tags=12%, list=1%, signal=11%	SLC9A4/SLC24A2/SLC9A2
GOBP_TRANSCRIPTION_COUPLED_NUCLEOTIDE_EXCISION_REPAIR	GOBP_TRANSCRIPTION_COUPLED_NUCLEOTIDE_EXCISION_REPAIR	73	0.375022	1.38136	0.0196331	0.128369	0.107453	32836	tags=99%, list=58%, signal=42%	COPS4/UBB/POLR2L/POLR2K/DDB1/RPA3/POLR2C/ERCC4/USP7/MNAT1/ERCC8/GTF2H2/POLK/COPS8/COPS3/XPA/ERCC2/AQR/POLR2B/PCNA/RFC3/COPS2/GTF2H5/TCEA1/CUL4A/CCNH/POLR2E/PRPF19/GPS1/RBX1/POLR2D/RPS27A/RFC1/GTF2H3/GTF2H1/EP300/RPA1/CDK7/COPS7A/ZNF830/COPS5/LIG3/POLR2F/POLD2/POLR2A/COPS6/POLR2G/RPA2/CUL4B/HMGN1/UBA52/POLR2I/ERCC1/UBC/ERCC6/POLD3/XAB2/POLD4/ISY1/RFC5/ERCC3/COPS7B/POLR2H/POLR2J/PPIE/RFC4/ERCC5/RFC…
GOBP_CYTOKINE_PRODUCTION_INVOLVED_IN_IMMUNE_RESPONSE	GOBP_CYTOKINE_PRODUCTION_INVOLVED_IN_IMMUNE_RESPONSE	93	0.353684	1.30785	0.0196642	0.128427	0.107502	1102	tags=5%, list=2%, signal=5%	APOA1/APOA2/CLNK/ARG1/KIT
GOMF_OXIDOREDUCTASE_ACTIVITY_ACTING_ON_PAIRED_DONORS_WITH_INCORPORATION_OR_REDUCTION_OF_MOLECULAR_OXYGEN_REDUCED_FLAVIN_OR_FLAVOPROTEIN_AS_ONE_DONOR_AND_INCORPORATION_OF_ONE_ATOM_OF_OXYGEN	GOMF_OXIDOREDUCTASE_ACTIVITY_ACTING_ON_PAIRED_DONORS_WITH_INCORPORATION_OR_REDUCTION_OF_MOLECULAR_OXYGEN_REDUCED_FLAVIN_OR_FLAVOPROTEIN_AS_ONE_DONOR_AND_INCORPORATION_OF_ONE_ATOM_OF_OXYGEN	35	0.479693	1.49605	0.0196913	0.128427	0.107502	3834	tags=26%, list=7%, signal=24%	CYP2A6/CYP1A2/CYP2A7/CYP1A1/CYP3A4/CYP2B6/CYP4A11/CYP4F2/CYP3A7
GOBP_PLASMA_LIPOPROTEIN_PARTICLE_CLEARANCE	GOBP_PLASMA_LIPOPROTEIN_PARTICLE_CLEARANCE	61	0.411728	1.44944	0.0197007	0.128427	0.107502	5985	tags=18%, list=11%, signal=16%	APOC3/APOA1/APOA2/MIR33A/PCSK9/DGAT2/APOM/CUBN/LDLR/AMN/MIR27B
GOBP_BLOOD_VESSEL_ENDOTHELIAL_CELL_PROLIFERATION_INVOLVED_IN_SPROUTING_ANGIOGENESIS	GOBP_BLOOD_VESSEL_ENDOTHELIAL_CELL_PROLIFERATION_INVOLVED_IN_SPROUTING_ANGIOGENESIS	45	0.437271	1.443	0.019742	0.128568	0.10762	5985	tags=22%, list=11%, signal=20%	MIR15A/APELA/FGFBP1/MIR494/IL12B/AGTR1/MIR222/MIR361/MIR2355/MIR27B
GOBP_CELLULAR_RESPONSE_TO_TOPOLOGICALLY_INCORRECT_PROTEIN	GOBP_CELLULAR_RESPONSE_TO_TOPOLOGICALLY_INCORRECT_PROTEIN	168	0.308716	1.24788	0.0198096	0.12888	0.107881	13318	tags=43%, list=23%, signal=33%	PACRG/UMOD/AGR2/DNAJB9/TMEM33/ERMP1/CCL2/AMFR/CLGN/HSPA9/HSPA8/ATP6V0D1/DNAJB14/CCND1/PPP1R15B/CUL3/HSPD1/FICD/BOK/HSPA13/GFPT1/KLHL15/SRPRB/HERPUD1/SERP1/TM7SF3/DNAJC3/EIF2AK3/UBE2W/CREB3/EIF2S1/NFE2L2/TMBIM6/XBP1/HSPA2/HSPA5/WFS1/YOD1/BAG3/WIPI1/RNF185/UFL1/YIF1A/GET3/ATF3/SELENOS/RNF5/RHBDD2/STUB1/TOR1A/CANX/CREBRF/SSR1/SDF2L1/TPP1/EXTL2/RNF121/PREB/PDIA6/VAPB/EXTL3/LMNA/DDIT3/MBTPS2/PIK3R1/SR…
GOBP_REGULATION_OF_MITOCHONDRIAL_MEMBRANE_POTENTIAL	GOBP_REGULATION_OF_MITOCHONDRIAL_MEMBRANE_POTENTIAL	71	0.371692	1.35141	0.0198524	0.128918	0.107913	12589	tags=44%, list=22%, signal=34%	CCK/NNT/GOT1/CCN6/SLC25A33/NDUFS1/PPA2/PRDX3/MUL1/PMAIP1/TUSC2/BOK/PINK1/FZD9/MAPT/UBB/BCO2/GCLM/STOML2/BCL2/STOX1/ARL6IP5/BNIP3/PPP2R3C/SPART/KDR/LRRK2/PRELID1/SOD1/VCP/MIR181B1
GOBP_NOTCH_SIGNALING_PATHWAY	GOBP_NOTCH_SIGNALING_PATHWAY	185	0.28276	1.17534	0.0198642	0.128918	0.107913	10743	tags=24%, list=19%, signal=19%	NR0B2/BMP7/KIT/NEURL1/EGF/CNTN6/MAGEA1/TSPAN5/MIR1224/GOT1/TSPEAR/NOTCH2NLB/ASCL1/GAS2/PBX1/SOX9/CHAC1/DNER/GALNT11/SYNJ2BP/FOXC1/GATA5/CNTN1/DLK1/ELF3/WWC1/PDCD10/BMP2/CD46/LLGL2/ENHO/TCIM/PRKCI/PSEN1/MIB1/NOTCH2NLA/SEL1L/YTHDF2/IL6ST/GATA2/APP/TGFBR2/SREBF2/WDR12
GOCC_RUFFLE_MEMBRANE	GOCC_RUFFLE_MEMBRANE	95	0.352146	1.30922	0.0198744	0.128918	0.107913	12491	tags=35%, list=22%, signal=27%	PLA2G4F/AIF1L/EPB41L5/FERMT1/MYO6/PDPN/TWF1/EZR/TESC/PACSIN2/EPS8/WWC1/MTMR6/PTPRJ/TRPV4/IFIT5/EPHA2/PSD3/CLCN3/SH3YL1/PLEKHA1/DIAPH1/ARHGEF4/MTMR9/SPRY2/CLASP2/PDXP/FAM107A/ARF4/APC/THEM4/EEF1A1/ITGAV
GOMF_PHOSPHATIDYLINOSITOL_PHOSPHATE_5_PHOSPHATASE_ACTIVITY	GOMF_PHOSPHATIDYLINOSITOL_PHOSPHATE_5_PHOSPHATASE_ACTIVITY	12	0.687932	1.72504	0.0199321	0.129165	0.108119	275	tags=8%, list=0%, signal=8%	INPP5J
GOBP_MATURATION_OF_SSU_RRNA_FROM_TRICISTRONIC_RRNA_TRANSCRIPT_SSU_RRNA_5_8S_RRNA_LSU_RRNA	GOBP_MATURATION_OF_SSU_RRNA_FROM_TRICISTRONIC_RRNA_TRANSCRIPT_SSU_RRNA_5_8S_RRNA_LSU_RRNA	37	0.466464	1.45211	0.0199937	0.129436	0.108346	30352	tags=100%, list=53%, signal=47%	UTP4/UTP3/UTP20/RRS1/RRP36/DCAF13/ERCC2/BYSL/NOP9/GTF2H5/RPP40/TSR2/UTP23/NOL10/NGDN/MRPS11/NOP14/TBL3/ABT1/RCL1/TSR1/FP565260.1/RPS21/WDR46/RPS14/BMS1/UTP25/FAM207A/RPS16/HEATR1/UTP6/PWP2/DHX37/RPS8/HELB/KRI1/RPS19
GOBP_REGULATION_OF_INTESTINAL_ABSORPTION	GOBP_REGULATION_OF_INTESTINAL_ABSORPTION	11	0.706161	1.7482	0.0201045	0.130025	0.108839	306	tags=18%, list=1%, signal=18%	APOA5/APOA1
GOBP_NEUTRAL_AMINO_ACID_TRANSPORT	GOBP_NEUTRAL_AMINO_ACID_TRANSPORT	44	0.457491	1.51889	0.0201603	0.130258	0.109034	4952	tags=25%, list=9%, signal=23%	SLC38A3/SLC6A15/SLC36A2/SLC7A8/SLC6A19/ACE2/CLTRN/SLC6A20/SLC7A9/SFXN2/SLC1A1
GOCC_PLATELET_DENSE_GRANULE_LUMEN	GOCC_PLATELET_DENSE_GRANULE_LUMEN	14	0.664354	1.70721	0.0202512	0.130704	0.109407	7906	tags=64%, list=14%, signal=55%	APOH/SPP2/SERPINA4/ITIH3/CLEC3B/CDC37L1/TIMP3/FAM3C/SELENOP
GOMF_N_ACETYLTRANSFERASE_ACTIVITY	GOMF_N_ACETYLTRANSFERASE_ACTIVITY	72	0.383359	1.40394	0.0202692	0.130704	0.109407	12538	tags=33%, list=22%, signal=26%	NAT8L/CDY1B/CDY2B/CDY1/NAT8B/NAT8/GNPNAT1/NAA30/NAA50/ELP3/NAA15/NAGS/HAT1/GTF3C4/NAT1/TAF9/NAT2/CLOCK/NAA20/BRPF3/KAT5/NCOA1/GTF2B/USP22
GOBP_LIPOXYGENASE_PATHWAY	GOBP_LIPOXYGENASE_PATHWAY	16	0.624452	1.65803	0.0203538	0.13112	0.109756	4265	tags=25%, list=8%, signal=23%	PON1/PLA2G3/HPGD/PON3
GOBP_VASCULAR_ASSOCIATED_SMOOTH_MUSCLE_CELL_DIFFERENTIATION	GOBP_VASCULAR_ASSOCIATED_SMOOTH_MUSCLE_CELL_DIFFERENTIATION	34	0.494254	1.52794	0.0205895	0.132508	0.110918	1590	tags=9%, list=3%, signal=9%	FGF9/KIT/MIR100
GOBP_KETONE_CATABOLIC_PROCESS	GOBP_KETONE_CATABOLIC_PROCESS	13	0.6737	1.7094	0.020616	0.132549	0.110952	3350	tags=31%, list=6%, signal=29%	OXCT1/HSD17B6/ALDH8A1/CYP4F2
GOBP_ENDOCRINE_PROCESS	GOBP_ENDOCRINE_PROCESS	78	0.388432	1.3928	0.0206424	0.132589	0.110985	8811	tags=32%, list=15%, signal=27%	CRH/HSD11B2/CES1/AVPR1A/TRPV6/CRHBP/TAC1/ACE2/GALR1/SUCNR1/ATP6AP2/REN/CMA1/F2RL1/AGTR1/CRY1/GAL/RAB11FIP5/AVPR1B/LEP/AGTR2/KRAS/RAB11FIP1/AGT/CTSG
GOBP_GLUCOCORTICOID_METABOLIC_PROCESS	GOBP_GLUCOCORTICOID_METABOLIC_PROCESS	25	0.557661	1.60987	0.0207165	0.132903	0.111248	4303	tags=24%, list=8%, signal=22%	CYP17A1/APOA1/HSD11B2/CYP11A1/SERPINA6/ATP1A1
GOCC_SPECIFIC_GRANULE_LUMEN	GOCC_SPECIFIC_GRANULE_LUMEN	62	0.407227	1.42636	0.0207318	0.132903	0.111248	1376	tags=10%, list=2%, signal=9%	ORM2/ORM1/ARG1/OLFM4/LCN2/FOLR3
GOBP_AMINO_ACID_ACTIVATION	GOBP_AMINO_ACID_ACTIVATION	49	0.438625	1.47456	0.0208532	0.133464	0.111718	16485	tags=63%, list=29%, signal=45%	MARS2/PPA2/LARS2/AIMP2/NARS1/NARS2/EARS2/QRSL1/DARS2/EEF1E1/GATB/PARS2/PPA1/FARS2/FARSB/TARS1/WARS2/IARS2/DARS1/AARS1/WARS1/AASDH/VARS1/IARS1/GATC/LARS1/RARS1/RARS2/YARS2/FARSA/GARS1
GOBP_CATECHOL_CONTAINING_COMPOUND_BIOSYNTHETIC_PROCESS	GOBP_CATECHOL_CONTAINING_COMPOUND_BIOSYNTHETIC_PROCESS	20	0.57721	1.63792	0.0208601	0.133464	0.111718	5740	tags=40%, list=10%, signal=36%	PAH/INSM1/PNMT/DAO/DDC/TH/HAND2/GPR37
GOMF_NUCLEOTIDYLTRANSFERASE_ACTIVITY	GOMF_NUCLEOTIDYLTRANSFERASE_ACTIVITY	125	0.312922	1.21633	0.0209751	0.134069	0.112225	12766	tags=30%, list=22%, signal=23%	DNTT/CDS1/GPHN/MAB21L1/MED21/POLR3B/FICD/PCYT2/CRPPA/UAP1/POLR1F/POLR2L/TRNT1/POLR2M/POLR2K/NMNAT2/FPGT/POLR2C/PNPT1/TENT4B/YRDC/NMNAT3/NMNAT1/POLR1B/POLR3K/POLK/MTPAP/UGP2/PAPOLA/RNGTT/POLR3F/POLR2B/PTGES3/POLE4/MOCS3/TERC/CDS2
GOBP_FRUCTOSE_METABOLIC_PROCESS	GOBP_FRUCTOSE_METABOLIC_PROCESS	15	0.666095	1.71891	0.0210197	0.134223	0.112353	13831	tags=80%, list=24%, signal=61%	ALDOB/PFKFB2/FBP1/SORD/KHK/AKR1B1/ALDH1A1/FBP2/ALDOA/PFKFB1/GLYCTK/TKFC
GOMF_CARBOHYDRATE_CATION_SYMPORTER_ACTIVITY	GOMF_CARBOHYDRATE_CATION_SYMPORTER_ACTIVITY	16	0.622546	1.65297	0.0211292	0.134791	0.112829	11352	tags=62%, list=20%, signal=50%	SLC5A2/SLC5A1/SLC45A2/SLC5A10/SLC17A5/SLC5A11/SLC2A9/SLC23A1/SLC5A3/SLC45A4
GOMF_CYSTEINE_TYPE_PEPTIDASE_ACTIVITY	GOMF_CYSTEINE_TYPE_PEPTIDASE_ACTIVITY	166	0.297132	1.18716	0.0213394	0.136	0.113841	12601	tags=37%, list=22%, signal=29%	USP17L6P/CASP14/PGPEP1L/CTSK/USP17L15/USP17L10/USP2/SFRP1/CTSV/CAPN8/TINAG/USP17L8/USP17L7/USP17L3/LGMN/GGH/USP38/OTUD1/COPS4/UCHL3/CTSF/ATG4A/USP17L2/USP51/OTUD6B/SENP8/MINDY1/ATG4D/SCRN1/PIGK/CAPN5/CTSH/SCRN3/MINDY2/USP14/USP46/USP45/YOD1/USP9X/USP10/USP7/CTSL/UFSP2/OTUD7A/USP12/CAPN7/CTSO/MINDY3/UCHL5/USP28/CTSC/ZRANB1/USP8/CTSB/USP42/USP47/USP16/SENP2/USP22/USP32/USP25
GOCC_SYNAPTIC_VESICLE_MEMBRANE	GOCC_SYNAPTIC_VESICLE_MEMBRANE	101	0.327368	1.23667	0.0214497	0.136221	0.114026	6274	tags=19%, list=11%, signal=17%	ATP6V1B1/UNC13C/SH3GL2/SYNGR3/SV2B/SLC18A2/DGKI/SYT9/SVOP/SYT8/SV2C/BSN/GABRA2/SLC17A7/SYT7/SYNPR/SYPL1/SCAMP1/SYPL2
GOBP_NEGATIVE_REGULATION_OF_PROGRAMMED_NECROTIC_CELL_DEATH	GOBP_NEGATIVE_REGULATION_OF_PROGRAMMED_NECROTIC_CELL_DEATH	17	0.621642	1.66716	0.0214721	0.136221	0.114026	4386	tags=18%, list=8%, signal=16%	MIR485/SLC25A4/MIR221
GOBP_L_ALPHA_AMINO_ACID_TRANSMEMBRANE_TRANSPORT	GOBP_L_ALPHA_AMINO_ACID_TRANSMEMBRANE_TRANSPORT	61	0.407827	1.43571	0.0214727	0.136221	0.114026	10617	tags=46%, list=19%, signal=37%	SLC38A3/SLC7A8/SLC7A3/SLC1A6/GRM1/ACE2/CLTRN/SLC6A20/SLC7A9/KCNJ10/SLC1A1/SLC17A7/SLC22A2/SLC25A15/SLC1A2/SLC7A7/SLC47A1/SLC7A13/SLC3A2/SLC25A13/SLC43A1/CLN8/SLC25A12/SLC43A2/PSEN1/SLC25A18/ARL6IP1/ARL6IP5
GOMF_ALKALI_METAL_ION_BINDING	GOMF_ALKALI_METAL_ION_BINDING	16	0.621012	1.6489	0.0215168	0.136221	0.114026	4303	tags=25%, list=8%, signal=23%	KCNJ11/ACAT1/PKLR/ATP1A1
GOMF_U6_SNRNA_BINDING	GOMF_U6_SNRNA_BINDING	16	0.618576	1.64243	0.0215168	0.136221	0.114026	1425	tags=12%, list=3%, signal=12%	RNU4-2/RNU4-1
GOBP_SEROTONIN_TRANSPORT	GOBP_SEROTONIN_TRANSPORT	20	0.576232	1.63514	0.0215294	0.136221	0.114026	2088	tags=15%, list=4%, signal=14%	CRH/SLC18A2/SLC6A4
GOBP_REGULATION_OF_PROTEIN_LOCALIZATION_TO_PLASMA_MEMBRANE	GOBP_REGULATION_OF_PROTEIN_LOCALIZATION_TO_PLASMA_MEMBRANE	98	0.340791	1.27668	0.0215429	0.136221	0.114026	11413	tags=38%, list=20%, signal=30%	DPP10/AGR2/VIL1/KCNJ11/WNK3/STAC2/PLS1/ZDHHC2/LYPLA1/PRKCE/EZR/ACSL3/RAB11FIP2/VAMP8/PPP2R5A/STX3/LGALS3/VTI1B/CLTC/EPHA2/PRKCI/GPER1/RAB11A/PICALM/ARF6/KIF5B/APPL1/PDPK1/TMEM59/SPTBN1/SQSTM1/STX7/DLG1/TMBIM1/RHOQ/GBP1/ZDHHC5
GOMF_ANION_CATION_SYMPORTER_ACTIVITY	GOMF_ANION_CATION_SYMPORTER_ACTIVITY	22	0.565591	1.60973	0.0215497	0.136221	0.114026	2861	tags=27%, list=5%, signal=26%	SLC6A2/SLC12A3/SLC18A2/SLC12A1/SLC6A4/SLC13A1
GOBP_RIBONUCLEOSIDE_TRIPHOSPHATE_BIOSYNTHETIC_PROCESS	GOBP_RIBONUCLEOSIDE_TRIPHOSPHATE_BIOSYNTHETIC_PROCESS	72	0.381766	1.3981	0.0215699	0.136221	0.114026	10038	tags=38%, list=18%, signal=31%	PPARGC1A/ATP6V1A/PKLR/MTCO2P12/ATP5F1A/ATP5MC3/ATP5MG/ATP5F1B/ATP5ME/ATP5PF/ATP5PB/DMAC2L/CTPS1/PRKAG2/SLC25A13/ATPSCKMT/PINK1/ATP5MC1/ATP5PO/LDHC/SLC25A12/NME5/ATP5F1C/STOML2/DNAJC30/PPARA/ATP5PD
GOBP_METANEPHROS_DEVELOPMENT	GOBP_METANEPHROS_DEVELOPMENT	82	0.364706	1.31649	0.0215818	0.136221	0.114026	4887	tags=17%, list=9%, signal=16%	UMOD/CALB1/AQP2/BMP7/NPHS2/GPC3/SOX8/IRX1/FOXJ1/SIX4/TFAP2B/LGR4/LHX1/SOX9
GOMF_UBIQUITIN_LIKE_PROTEIN_BINDING	GOMF_UBIQUITIN_LIKE_PROTEIN_BINDING	101	0.326755	1.23435	0.0217376	0.137073	0.114739	38311	tags=100%, list=67%, signal=33%	HABP4/AMFR/TOM1L1/TOLLIP/UCHL3/TSG101/FBXO7/TAB3/UBE2N/CKS2/RAD23B/TP53INP2/PLAA/DCUN1D1/MARCHF7/RNF185/DCUN1D5/VPS36/SQSTM1/NBR1/RNF8/SPRTN/UBXN2A/UBAP1/TAB2/WDR48/USP16/USP25/UBXN2B/FAF2/SERBP1/BIRC2/TRIM32/RNF111/SMARCAD1/UBE2L6/ZFAND2B/UBA2/RNFT1/RNF4/DNAJB2/OTUB1/RNF19B/N4BP2/CUEDC2/ILRUN/DCUN1D4/SOBP/FAF1/CUEDC1/SIMC1/HERC2/USP13/OTUB2/USP5/SMAD3/RNF168/NSFL1C/RAE1/UBXN1/BUB3/UBR5/UBXN7/WDR…
GOBP_XENOBIOTIC_TRANSPORT	GOBP_XENOBIOTIC_TRANSPORT	40	0.463364	1.47194	0.021845	0.137607	0.115186	12546	tags=50%, list=22%, signal=39%	ABCB11/ABCA8/SLC6A13/SLC15A2/PDZK1/SLC22A2/ABCC4/SLC47A1/SLC22A4/ABCG2/SLC17A3/SLC22A1/ABCB1/ABCC6/SLC47A2/LRRC8D/OSCP1/LRRC8A/RALBP1/SLC22A5
GOMF_HORMONE_BINDING	GOMF_HORMONE_BINDING	84	0.368633	1.32355	0.0218644	0.137607	0.115186	4520	tags=19%, list=8%, signal=18%	GCGR/TTR/PRLR/LHCGR/MTNR1A/AVPR1A/CRHBP/MLNR/CRYM/GHR/PTH1R/LRP2/ATP1A1/GALR1/THRB/ABHD2
GOBP_CELLULAR_RESPONSE_TO_OSMOTIC_STRESS	GOBP_CELLULAR_RESPONSE_TO_OSMOTIC_STRESS	39	0.457906	1.4442	0.0218978	0.137685	0.115252	11005	tags=41%, list=19%, signal=33%	AQP5/SLC2A4/WNK3/SCN2A/EFHD1/AQP1/MBIP/AKR1B1/MICU1/CAB39/TRPV4/DDX3X/LETM1/LRRC8D/SLC12A6/XRCC5
[truncated: 300 more rows]

## Sheet: Supplementary Table 8
Supplementary Table 8. GSEA analysis of KEGG pathway enrichment items of FDX1.
ID	Description	setSize	enrichmentScore	NES	pvalue	p.adjust	qvalues	rank	leading_edge	core_enrichment
[truncated: 71 more rows]

## Sheet: Supplementary Table 10
Supplementary Table 10. Detailed information of the 75 ccRCC patients.
[truncated: 76 more rows]
